# Supplementary material
Source: PubMed Central journal article supplement (PMC2631935)

## Cyclic Ketimines as Superior Electrophiles for NHC-Catalyzed Homoenolate Additions with Broad Scope and Low Catalyst Loadings

Michael Rommel, Takeo Fukuzumi, and Jeffrey W. Bode

*Department of Chemistry, University of Pennsylvania,  
Philadelphia, PA 19104-6323, USA*

### Supporting Information

#### Table of Contents:

|      |                                                                                   |      |
|------|-----------------------------------------------------------------------------------|------|
| I.   | General Methods                                                                   | S-2  |
| II.  | Experimental Procedures and Characterization Data                                 |      |
|      | Preparation of the Cyclic Sulfonyl Ketimines                                      | S-2  |
|      | Optimization of the $\gamma$ -Lactam Forming Reaction Conditions                  | S-8  |
|      | Annulation of $\alpha,\beta$ -unsaturated Aldehydes and Cyclic Sulfonyl Ketimines | S-9  |
| III. | Determination of the Relative Configuration by X-ray Analysis                     | S-22 |
| IV.  | NMR Spectra of the Cyclic Sulfonyl Ketimines                                      | S-23 |
| V.   | NMR Spectra of the $\gamma$ -Lactam Annulation Products                           | S-47 |

**General Methods.**

All reactions utilizing air- or moisture-sensitive reagents were performed in dried glassware under an atmosphere of nitrogen.  $\text{CH}_2\text{Cl}_2$  was distilled from  $\text{CaH}_2$ . THF and  $\text{Et}_2\text{O}$  were distilled from Na/benzophenone. All aldehydes were purified by distillation or sublimation prior to use. DBU was distilled from  $\text{CaH}_2$ . Triazolium salt **1** is commercially available from Sigma-Aldrich. Other reagents were used without further purification. Thin layer chromatography (TLC) was performed on EMD precoated plates (silica gel 60 F<sub>254</sub>, Art 5715) and were visualized by fluorescence quenching under UV light and by staining with phosphomolybdic acid or potassium permanganate, respectively. Column chromatography was performed on EMD Silica Gel 60 (230–400 Mesh) using a forced flow of 0.5–1.0 bar.  $^1\text{H}$  NMR (500 MHz) and  $^{13}\text{C}$  NMR (100 MHz) were measured on a Bruker Avance AVII-500 spectrometer. Chemical shifts are expressed in parts per million (ppm) with respect to the residual solvent peak. Coupling constants are reported as Hertz (Hz), signal shapes and splitting patterns are indicated as follows: br, broad; s, singlet; d, doublet; t, triplet; q, quartet; m, multiplet; C<sub>q</sub>, quaternary carbon. Infrared (IR) spectra were recorded on a JASCO FT/IR-4100 spectrophotometer and are reported as wavenumber ( $\text{cm}^{-1}$ ).

**General Procedures for the Preparation of the Cyclic Sulfonyl Ketimines S3.**

The ketimines were prepared according to modified literature procedures, the ones used for table 1, entries 1, 8, 9, 10 and 11 are known compounds.<sup>1</sup>

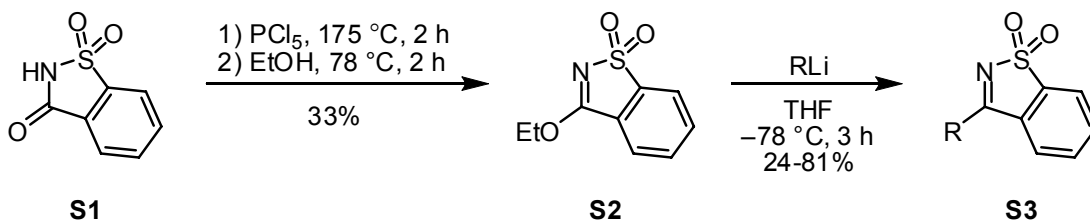**General Procedure 1:<sup>1a</sup>**

**3-Ethoxy-1,2-benzisothiazole 1,1-dioxide (S2).** Saccharin (**S1**, 52.0 g, 0.284 mol) and  $\text{PCl}_5$  (71.8 g, 0.345 mol) were gently heated until the reaction mixture became an oil, then the

<sup>1</sup> (a) For entries 1, 10 and 11 see: Davis, F. A.; Towson, J. C.; Vashi, D. B.; ThimmaReddy, R.; McCauley, J. P., Jr.; Harakal, M. E.; Gosciniak, D. J. *J. Org. Chem.* **1990**, *55*, 1254-1261. (b) For entry 8 see: Hellwinkel, D.; Karle, R. *Synthesis*, **1989**, 394-395. (c) For entry 9 see: Abramovitch, R. A.; Smith, E. M.; Humber, M.; Purtschert, B.; Srinivasan, P. C.; Singer, G. M. *J. Chem Soc. Perkin Trans. 1*, **1974**, *22*, 2589-2594.

temperature was raised to 175 °C for additional 1.5 h. The side product  $\text{POCl}_3$  was removed under reduced pressure, and the crude 3-chloro-1,2-benzisothiazole 1,1-dioxide was treated with absolute EtOH (400 mL). The reaction mixture was refluxed for 1 h, then cooled to room temperature. The precipitated product was collected by filtration and washed with ice-cold EtOH. The mother liquor was cooled in an ice bath to obtain more precipitate. The solids were combined and dried to give *O*-ethylsaccharin (**S2**, 23.7 g, 33%) as colorless fine-crystalline material. m.p. 216.0–219.0°C;  $^1\text{H}$  NMR (500 MHz,  $\text{CDCl}_3$ ):  $\delta$ =1.54 (t,  $J$ =7.0 Hz, 3H), 4.67 (q,  $J$ =7.0 Hz, 2H), 7.68–7.72 (m, 1H), 7.74–7.78 (m, 2H), 7.88 (d,  $J$ =7.5 Hz, 1H);  $^{13}\text{C}$  NMR (125 MHz,  $\text{CDCl}_3$ ):  $\delta$ =14.4, 68.6, 122.2, 123.6, 127.5, 133.7, 134.3, 143.9, 169.5. The analytical data is consistent with the literature.<sup>1a</sup>

**Cyclic Sulfonyl Ketimines S3.** The required organolithium reagent (RLi, 1.2 equiv) was prepared from the corresponding bromides and *n*-BuLi in THF at –78 °C. A suspension of 3-ethoxy-1,2-benzisothiazole 1,1-dioxide (**S2**, 1.0 equiv) was added via cannula at –78 °C. The reaction mixture was stirred for 1 h at –78 °C and warmed to room temperature over 2 h. The reaction was quenched by addition of sat aq  $\text{NH}_4\text{Cl}$  solution. The reaction mixture was extracted with EtOAc, washed with sat aq NaCl solution and dried over anhydrous  $\text{Na}_2\text{SO}_4$ . The solvent was removed under reduced pressure and the crude product was purified by silica gel chromatography (hexanes/EtOAc).

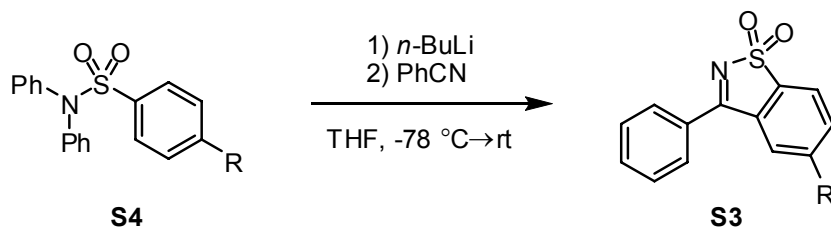

**General Procedure 2:**<sup>1b</sup> A solution of the corresponding *N,N*-diphenylbenzenesulfonamide **S4** (1.0 equiv) in THF was *ortho*-lithiated with *n*-BuLi (1.1 equiv) at –78 °C for 1 h. Benzonitrile (1.1 equiv) was added to the reaction mixture at –78 °C, which was then warmed to room temperature slowly. The reaction was quenched by addition of sat aq  $\text{NH}_4\text{Cl}$  solution. It was extracted with EtOAc, washed with sat aq NaCl solution, and dried over anhydrous  $\text{Na}_2\text{SO}_4$ . The solvent was removed under reduced pressure, and the crude product was purified by silica gel chromatography ( $\text{CH}_2\text{Cl}_2$ ).

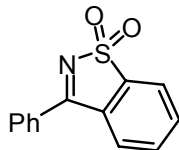

**3-Phenyl-1,2-benzisothiazole 1,1-dioxide** (for table 1, entry 1, and table 2). Prepared according to General Procedure 1. It was purified by recrystallization from EtOAc as a colorless solid in 58% yield.  $R_f=0.60$  (hexanes/EtOAc 1:1); 166.0–167.0°C;  $^1\text{H NMR}$  (500 MHz,  $\text{CDCl}_3$ ):  $\delta=7.61$  (d,  $J=7.5$  Hz, 2H), 7.68–7.81 (m, 3H), 7.91 (d,  $J=8.0$  Hz, 1H), 7.98 (d,  $J=7.5$  Hz, 2H), 8.02 (d,  $J=7.5$  Hz, 1H);  $^{13}\text{C NMR}$  (125 MHz,  $\text{CDCl}_3$ ):  $\delta=123.2, 126.8, 129.4, 129.7, 130.6, 130.7, 133.6, 133.8, 141.2, 171.2$ ; Spectral data is consistent with published data.<sup>1a</sup>

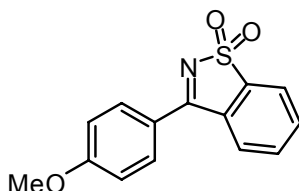

**3-(4-Methoxyphenyl)-1,2-benzisothiazole 1,1-dioxide** (for table 1, entry 2). Prepared according to General Procedure 1 as a colorless solid in 31% yield.  $R_f=0.40$  (hexanes/EtOAc 1:1); m.p. 210.0–211.5°C;  $^1\text{H NMR}$  (500 MHz,  $\text{CDCl}_3$ ):  $\delta=3.93$  (s, 3H), 7.09 (d,  $J=12.0$  Hz, 2H), 7.72–7.78 (m, 2H), 7.94–7.97 (m, 1H), 7.98–8.02 (m, 1H), 8.02 (d,  $J=12.0$  Hz, 2H);  $^{13}\text{C NMR}$  (125 MHz,  $\text{CDCl}_3$ ):  $\delta=56.0, 115.1$  (2C), 123.2, 123.3, 126.9, 131.2 (2C), 132.3, 133.5, 133.8, 141.7, 164.5, 170.2; IR (thin film):  $\tilde{\nu}=1604, 1505, 1319$  s, 1256, 1161 s, 1134, 1023, 962, 844, 785, 750; HRMS (ESI):  $m/z$ : calcd for  $\text{C}_{14}\text{H}_{12}\text{NO}_3\text{S}$ : 274.0538; found: 274.0511 [ $M+H$ ]<sup>+</sup>.

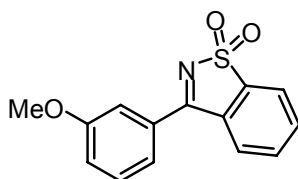

**3-(3-Methoxyphenyl)-1,2-benzisothiazole 1,1-dioxide** (for table 1, entry 3). Prepared according to General Procedure 1 as a colorless solid in 81% yield.  $R_f=0.60$  (hexanes/EtOAc 1:1); m.p. 173.0–174.0°C;  $^1\text{H NMR}$  (500 MHz,  $\text{CDCl}_3$ ):  $\delta=3.91$  (s, 3H), 7.21–7.25 (m, 1H), 7.47–7.55 (m, 3H), 7.73–7.82 (m, 2H), 7.92 (d,  $J=7.5$  Hz, 1H), 8.02 (d,  $J=7.0$  Hz, 1H);  $^{13}\text{C NMR}$  (125 MHz,  $\text{CDCl}_3$ ):  $\delta=56.0, 114.5, 120.1, 122.2, 123.4, 127.0, 130.6, 130.9, 131.9, 133.8, 134.0, 141.4, 160.5, 171.3$ ; IR (thin film):  $\tilde{\nu}=1597, 1530, 1485, 1469, 1452, 1428, 1329$  s, 1303, 1243, 1174 s,

1160, 1144, 1037, 864, 848, 809, 783, 777, 750, 740, 695, 642; HRMS (ESI):  $m/z$ : calcd for  $C_{14}H_{12}NO_3S$ : 274.0538; found: 274.0533  $[M+H]^+$ .

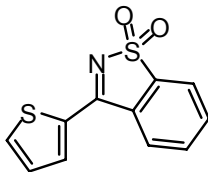

**3-(Thiophen-2-yl)-1,2-benzisothiazole 1,1-dioxide** (for table 1, entry 4). Prepared according to General Procedure 1 as a colorless solid in 70% yield.  $R_f=0.40$  (hexanes/EtOAc 1:1); m.p. 206.5–208.0°C;  $^1H$  NMR (500 MHz,  $CDCl_3$ ):  $\delta=7.32$ – $7.36$  (m, 1H), 7.78–7.82 (m, 2H), 7.87–7.89 (m, 1H), 8.00–8.03 (m, 1H), 8.18–8.22 (m, 1H), 8.22–8.24 (m, 1H);  $^{13}C$  NMR (125 MHz,  $CDCl_3$ ):  $\delta=123.2$ , 125.9, 129.2, 130.5, 133.6, 133.8, 134.0, 135.3, 135.7, 141.4, 163.1; IR (thin film):  $\tilde{\nu}=1532$ , 1493, 1418, 1317, 1305, 1166, 1129, 913, 857, 799, 773, 743, 725, 663; HRMS (ESI):  $m/z$ : calcd for  $C_{11}H_8NO_2S_2$ : 248.9918; found: 248.9937  $[M+H]^+$ .

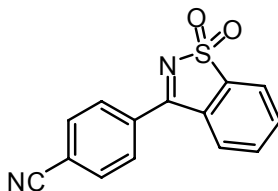

**3-(4-Cyanophenyl)-1,2-benzisothiazole 1,1-dioxide** (for table 1, entry 5). Prepared according to General Procedure 1 as a colorless solid in 24% yield.  $R_f=0.30$  (hexanes/EtOAc 1:1); m.p. 245.0–247.0°C;  $^1H$  NMR (500 MHz,  $CDCl_3$ ):  $\delta=7.78$ – $7.82$  (m, 2H), 7.83–7.87 (m, 1H), 7.92 (d,  $J=8.0$  Hz, 2H), 8.01 (d,  $J=7.5$ , 1H), 8.08 (d,  $J=8.0$  Hz, 2H);  $^{13}C$  NMR (125 MHz,  $CDCl_3$ ):  $\delta=117.1$ , 117.8, 123.9, 126.4, 130.0, 130.3 (2C), 133.2 (2C), 134.3, 134.3, 134.7, 141.3, 169.9; IR (thin film):  $\tilde{\nu}=2230_{CN}$ , 1613, 1564, 1531, 1498, 1489, 1338 s, 1311, 1298, 1286, 1173 s, 968, 783, 778, 773, 748, 735, 728; HRMS (ESI):  $m/z$ : calcd for  $C_{14}H_7N_2O_2S$ : 267.0228; found: 267.0219  $[M-H]^-$ .

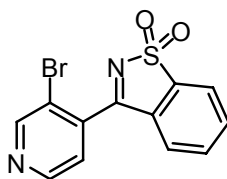

**3-(3-Bromopyridin-4-yl)-1,2-benzisothiazole 1,1-dioxide** (for table 1, entry 6). Prepared according to General Procedure 1 as a colorless solid in 35% yield. For the preparation of the

required organolithium reagent, see literature.<sup>2</sup>  $R_f=0.20$  (hexanes/EtOAc 1:1); m.p. 120.5–122.0°C; <sup>1</sup>H NMR (500 MHz, CDCl<sub>3</sub>):  $\delta=7.39$  (d,  $J=7.5$  Hz, 1H), 7.46 (d,  $J=5.0$  Hz, 1H), 7.68–7.74 (m, 1H), 7.77–7.84 (m, 1H), 8.02 (d,  $J=7.5$  Hz, 1H), 7.78 (d,  $J=9.0$  Hz, 1H), 8.97 (s, 1H); <sup>13</sup>C NMR (125 MHz, CDCl<sub>3</sub>):  $\delta=118.9$ , 123.6, 123.9, 126.5, 129.8, 134.4, 134.6, 139.7, 134.0, 149.2, 135.4, 169.9; IR (thin film):  $\tilde{\nu}=1550$ , 1396, 1343 s, 1308, 1267, 1175 s, 1090, 1023, 843, 783, 764, 750, 729, 706, 668; HRMS (ESI):  $m/z$ : calcd for C<sub>12</sub>H<sub>8</sub>BrN<sub>2</sub>O<sub>2</sub>S: 321.9412; found: 321.9427 [M+H]<sup>+</sup>.

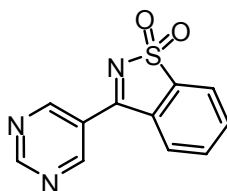

**3-(Pyrimidin-5-yl)-1,2-benzisothiazole 1,1-dioxide** (for table 1, entry 7). Prepared according to General Procedure 1 as a colorless solid in 42% yield.  $R_f=0.20$  (hexanes/EtOAc 1:1); m.p. 196.5–197.5°C; <sup>1</sup>H NMR (500 MHz, CDCl<sub>3</sub>):  $\delta=7.82$ –7.86 (m, 2H), 7.87–7.92 (m, 1H), 8.08 (d,  $J=7.6$  Hz, 1H), 9.35 (s, 2H), 9.51 (s, 1H); <sup>13</sup>C NMR (125 MHz, CDCl<sub>3</sub>):  $\delta=124.1$ , 125.6, 126.0, 129.6, 134.6, 134.7, 140.9, 157.3 (2C), 162.0, 167.0; IR (thin film):  $\tilde{\nu}=1575$ , 1557, 1527, 1420, 1349, 1334 s, 1306, 1196, 1175 s, 961, 804, 789, 750, 715, 705, 763, 669, 631; HRMS (ESI):  $m/z$ : calcd for C<sub>11</sub>H<sub>8</sub>N<sub>3</sub>O<sub>2</sub>S: 246.0259; found: 246.0259 [M+H]<sup>+</sup>.

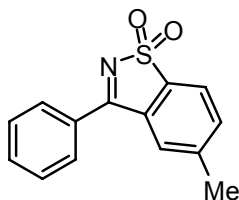

**5-Methyl-3-phenyl-1,2-benzisothiazole 1,1-dioxide** (for table 1, entry 8). Prepared according to General Procedure 2 as a colorless solid in 36% yield.  $R_f=0.60$  (CH<sub>2</sub>Cl<sub>2</sub>); m.p. 184.5–185.5°C; <sup>1</sup>H NMR (500 MHz, CDCl<sub>3</sub>):  $\delta=2.53$  (s, 3H), 7.57 (d,  $J=7.5$  Hz, 1H), 7.61 (t,  $J=8.0$  Hz, 2H), 7.65 (s, 1H), 7.70 (t,  $J=7.5$  Hz, 1H), 7.88 (d,  $J=8.0$ , 1H), 7.76 (d,  $J=8.0$  Hz, 2H); <sup>13</sup>C NMR (125 MHz, CDCl<sub>3</sub>):  $\delta=22.2$ , 123.2, 127.4, 129.5 (2C), 129.8 (2C), 130.9, 131.4, 133.6, 134.2, 138.7, 145.2, 171.5. Spectral data is consistent with published data.<sup>1b</sup>

<sup>2</sup> Gribble, G. W.; Saulnier, M.G. *Tetrahedron Lett.* **1980**, *21*, 4137-4140.

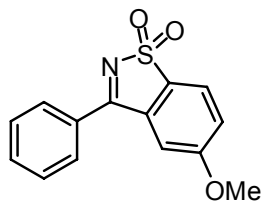

**5-Methoxy-3-phenyl-1,2-benzisothiazole 1,1-dioxide** (for table 1, entry 9). Prepared according to General Procedure 2 as a colorless solid in 58% yield.  $R_f=0.20$  (hexanes/EtOAc 7:3); m.p. 133.0–134.0°C;  $^1\text{H}$  NMR (500 MHz,  $\text{CDCl}_3$ ):  $\delta=3.93$  (s, 3H), 7.21 (dd,  $J=2.0, 8.0$  Hz, 1H), 7.30 (d,  $J=2.0$  Hz, 1H), 7.59–7.63 (m, 2H), 7.67–7.71 (m, 1H), 7.92 (d,  $J=8.5$  Hz, 1H), 7.93–7.96 (m, 2H);  $^{13}\text{C}$  NMR (125 MHz,  $\text{CDCl}_3$ ):  $\delta=56.7, 113.2, 117.7, 124.7, 129.6$  (2C), 129.7 (2C), 130.8, 132.7, 133.3, 133.6, 164.3, 170.9; IR (thin film):  $\tilde{\nu}=1580, 1536, 1447, 1330$  s, 1309, 1283, 1240, 1230, 1171, 1146, 1135, 973, 795, 773, 739, 698; HRMS (ESI):  $m/z$ : calcd for  $\text{C}_{14}\text{H}_{12}\text{NO}_3\text{S}$ : 274.0538; found: 274.0525  $[M+H]^+$ . Spectral data is consistent with published data.<sup>1c</sup>

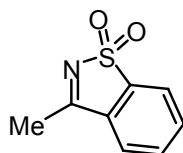

**3-Methyl-1,2-benzisothiazole 1,1-dioxide** (for table 1, entry 10). Prepared according to General Procedure 1 as a colorless solid in 77% yield.  $R_f=0.40$  (hexanes/EtOAc 1:1); 213.0–213.5°C;  $^1\text{H}$  NMR (500 MHz,  $\text{CDCl}_3$ ):  $\delta=2.67$  (s, 3H), 7.68–7.70 (m, 1H), 7.73–7.76 (m, 2H), 7.91–7.93 (m, 1H);  $^{13}\text{C}$  NMR (125 MHz,  $\text{CDCl}_3$ ):  $\delta=17.7, 122.5, 124.2, 131.7, 133.7, 134.1, 139.8, 173.3$ .

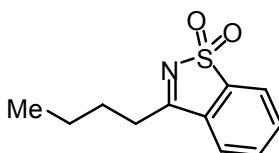

**3-(*n*-Butyl)-1,2-benzisothiazole 1,1-dioxide** (for table 1, entry 11). Prepared according to General Procedure 1 as a colorless solid in 79% yield.  $R_f=0.60$  (hexanes/EtOAc 1:1); 95.0–96.0°C;  $^1\text{H}$  NMR (500 MHz,  $\text{CDCl}_3$ ):  $\delta=0.98$  (t,  $J=7.0$  Hz, 3H), 1.47–1.54 (m, 2H), 1.82–1.89 (m, 2H), 2.96 (t,  $J=7.5$  Hz, 2H), 7.68–7.75 (m, 3H), 7.89 (t,  $J=3.0$  Hz, 1H);  $^{13}\text{C}$  NMR (125 MHz,  $\text{CDCl}_3$ ):  $\delta=14.1, 22.6, 27.7, 31.1, 122.7, 124.3, 131.6, 133.8, 134.2, 140.0, 176.7$ . Spectral data is consistent with published data.<sup>1a</sup>

**Optimization of the  $\gamma$ -lactam forming reaction conditions.**

The crude products were analyzed by NMR spectroscopy and the conversion of the imine was determined by integration of the prominent signal for the methyl group in the starting material ( $\delta=2.67$  ppm) and in the product ( $\delta=1.60$ ).

**Table S-1.** Optimization of the NHC-catalyzed annulation of cinnamaldehyde with a cyclic sulfonyl ketimine.

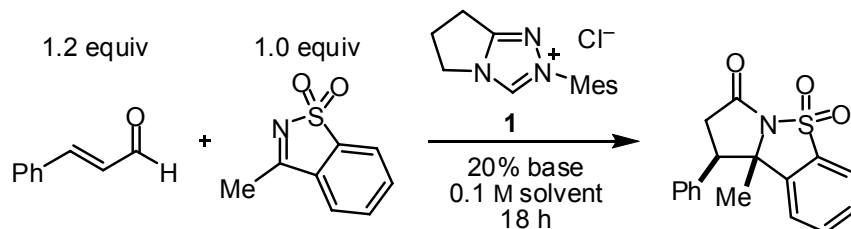

| entry | mol-% catalyst         | base             | solvent                               | T (°C) | % conversion |
|-------|------------------------|------------------|---------------------------------------|--------|--------------|
| 1     | 15 (IMes) <sup>a</sup> | DBU              | <i>t</i> BuOH                         | 60     | 66           |
| 2     | 15                     | DBU              | <i>t</i> BuOH                         | 40     | 22           |
| 3     | 15                     | DBU              | toluene                               | 40     | 24           |
| 4     | 15                     | DBU              | MeCN                                  | 40     | 50           |
| 5     | 15                     | DBU              | CH <sub>2</sub> Cl <sub>2</sub>       | 40     | >99          |
| 6     | 15                     | DBU              | THF                                   | 40     | 82           |
| 7     | 15                     | DBU              | THF                                   | 25     | 74           |
| 8     | 15                     | DBU              | EtOAc                                 | 25     | 68           |
| 9     | 15                     | DBU              | 1,2-dichloroethane                    | 25     | 83           |
| 10    | 15                     | DBU              | CH <sub>2</sub> Cl <sub>2</sub>       | 25     | >99          |
| 11    | 15                     | 10% DBU          | CH <sub>2</sub> Cl <sub>2</sub>       | 25     | 62           |
| 12    | 15                     | NEt <sub>3</sub> | CH <sub>2</sub> Cl <sub>2</sub>       | 25     | 36           |
| 13    | 15                     | DIPEA            | CH <sub>2</sub> Cl <sub>2</sub>       | 25     | 23           |
| 14    | 0.5                    | DBU              | CH <sub>2</sub> Cl <sub>2</sub>       | 25     | >99          |
| 15    | 0.1                    | DBU              | CH <sub>2</sub> Cl <sub>2</sub>       | 25     | 38           |
| 16    | 0                      | DBU              | CH <sub>2</sub> Cl <sub>2</sub>       | 25     | 0            |
| 17    | 0.5                    | DBU              | 0.2 M CH <sub>2</sub> Cl <sub>2</sub> | 25     | >99          |

<sup>a</sup> IMes = 1,3-Bis(2,4,6-trimethylphenyl)imidazol-2-ylidene.



### General Procedure for the Annulation of $\alpha,\beta$ -unsaturated Aldehydes and Cyclic Sulfonyl Ketimines.

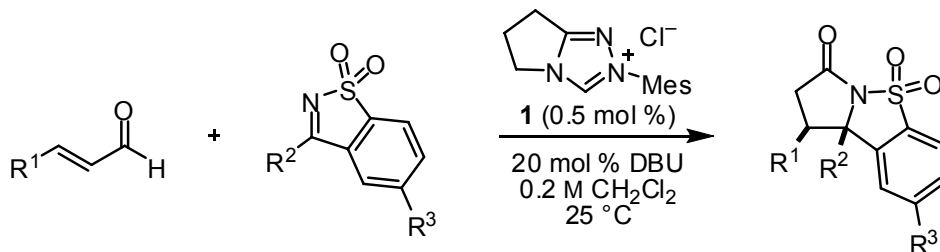

An oven-dried vial with a Teflon<sup>®</sup> coated screw cap and stir bar was charged with the cyclic sulfonyl imine (0.20 mmol, 1.0 equiv) and purged with nitrogen. The  $\alpha,\beta$ -unsaturated aldehyde (0.24 mmol, 1.2 equiv), dry  $\text{CH}_2\text{Cl}_2$  (0.9 mL) and a solution of the triazolium precatalyst **1** (1.0  $\mu\text{mol}$ , 0.5 mol %) in dry  $\text{CH}_2\text{Cl}_2$  (0.1 mL) were added. Finally, DBU (0.04 mmol, 0.2 equiv) was added, and the sealed vial was placed into an oil bath at 25 °C. After 16 to 24 hours  $\sim 50 \mu\text{L}$  of the reaction mixture was diluted with  $\text{CDCl}_3$  to confirm complete conversion and to determine the diastereomeric ratio by  $^1\text{H}$  NMR spectroscopy. The reaction mixture was directly applied onto a silica gel column (100:1 m/m silica gel/expected product) and eluted with hexanes/ $\text{CH}_2\text{Cl}_2$ /acetone (25:50:1 $\rightarrow$ 15:50:1 v/v/v) to give pure product.

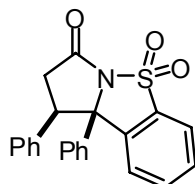

***rac*-(1*R*\*,9*bR*\*)-1,9*b*-Diphenyl-1,2-dihydrobenzo[*d*]pyrrolo[1,2-*b*]isothiazol-3-one 5,5-dioxide** (table 1, entry 1). Prepared according to the General Procedure as a colorless solid in 89% yield. A concentrated solution of the purified product in MeOH at room temperature for 24 h gave single crystals for x-ray crystallography.  $R_f=0.29$  (hexanes/ $\text{CH}_2\text{Cl}_2$ /acetone 25:50:1); m.p. 253–253.5°C;  $^1\text{H}$  NMR (500 MHz,  $\text{CDCl}_3$ ):  $\delta=2.90$  (dd,  $J=7.5, 17.0$  Hz, 1H, 2- $\text{H}^a$ ), 3.11 (dd,  $J=13.5, 17.0$  Hz, 1H, 2- $\text{H}^b$ ), 4.16 (dd,  $J=7.5, 14.0$  Hz, 1H, 1-H), 6.85 (d,  $J=7.5$  Hz, 2H), 7.16 (d,  $J=7.5$  Hz, 2H), 7.24–7.33 (m, 5H), 7.38 (t,  $J=7.5$  Hz, 1H), 7.61–7.65 (m, 1H), 7.74 (d,  $J=3.5$  Hz, 2H), 7.80 (d,  $J=8.0$  Hz, 1H);  $^{13}\text{C}$  NMR (125 MHz,  $\text{CDCl}_3$ ):  $\delta=39.3$  (C-2), 54.1 (C-1), 75.2 (C-9*b*), 122.2, 124.6, 127.1 (2C), 128.4 (2C), 128.6 (2C), 128.7, 128.9, 129.8 (2C), 130.1, 133.9, 134.3 (C<sub>q</sub>), 135.2 (C<sub>q</sub>), 135.9 (C<sub>q</sub>), 141.5 (C<sub>q</sub>), 169.8 (C-3); IR (thin film):  $\tilde{\nu}=3090, 3062, 3036, 3008, 2925, 2854, 1747$  s, 1601, 1584, 1496, 1465, 1452, 1445, 1417, 1346 s, 1313, 1287, 1248 s, 1215, 1178 s, 1138, 1102, 1081, 1065, 1033, 1013, 1001, 975, 949, 917, 894, 881, 867, 808, 772,

759, 735 s, 703 s, 682, 660, 643, 633, 619, 603, 587, 571; HRMS (ESI):  $m/z$ : calcd for  $C_{22}H_{17}NNaO_3S$ : 398.0827; found: 398.0844 [ $M+Na$ ] $^+$ .

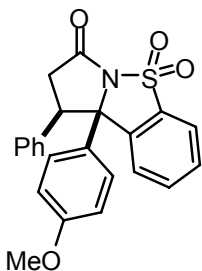

***rac*-(1*R*\*,9*bR*\*)-9*b*-(4-Methoxyphenyl)-1-phenyl-1,2-dihydrobenzo[*d*]pyrrolo[1,2-*b*]isothiazol-3-one 5,5-dioxide** (table 1, entry 2). Prepared according to the General Procedure as a colorless solid in 85% yield.  $R_f=0.20$  (hexanes/ $CH_2Cl_2$ /acetone 25:50:1); m.p. dec.  $>255^\circ C$ ;  $^1H$  NMR (500 MHz,  $CDCl_3$ ):  $\delta=2.85$  (dd,  $J=7.5, 17.0$  Hz, 1H, 2- $H^a$ ), 3.07 (dd,  $J=14.0, 17.0$  Hz, 1H, 2- $H^b$ ), 3.76 (s, 3H,  $OCH_3$ ), 4.09 (dd,  $J=7.0, 13.5$  Hz, 1H, 1-H), 6.74 (d,  $J=8.9$  Hz, 2H), 6.86 (d,  $J=7.3$  Hz, 2H), 7.03 (d,  $J=8.9$  Hz, 2H), 7.28 (t,  $J=7.5$  Hz, 2H), 7.35 (t,  $J=7.3$  Hz, 1H), 7.57 (t,  $J=7.6$  Hz, 1H), 7.64 (d,  $J=7.6$  Hz, 1H), 7.68 (t,  $J=7.5$  Hz, 1H), 7.76 (d,  $J=7.9$  Hz, 1H);  $^{13}C$  NMR (125 MHz,  $CDCl_3$ ):  $\delta=39.3$  (C-2), 54.0 (C-1), 55.3 ( $OCH_3$ ), 74.9 (C-9*b*), 113.6 (2C), 122.1, 124.3, 127.1 (C<sub>q</sub>), 128.3 (2C), 128.5 (2C), 128.8, 129.8 (3C), 133.8, 134.3 (C<sub>q</sub>), 135.7 (C<sub>q</sub>), 141.6 (C<sub>q</sub>), 159.7 (C<sub>q</sub>), 169.7 (C-3); IR (thin film):  $\tilde{\nu}=3063, 2934, 2838, 1746$  s, 1609, 1577, 1511, 1466, 1455, 1415, 1344 s, 1313, 1300, 1254 s, 1214, 1177 s, 1138, 1098, 1065, 1031, 958, 895, 831, 796, 768, 736, 702; HRMS (ESI):  $m/z$ : calcd for  $C_{23}H_{20}NO_4S$ : 406.1113; found: 406.1097 [ $M+H$ ] $^+$ .

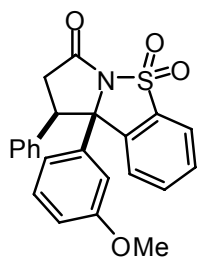

***rac*-(1*R*\*,9*bR*\*)-9*b*-(3-Methoxyphenyl)-1-phenyl-1,2-dihydrobenzo[*d*]pyrrolo[1,2-*b*]isothiazol-3-one 5,5-dioxide** (table 1, entry 3). Prepared according to the General Procedure. Purification using hexanes/ $CH_2Cl_2$ /acetone (25:50:1 v/v/v) as the eluent afforded the product as a colorless solid in 96% yield.  $R_f=0.13$  (hexanes/ $CH_2Cl_2$ /acetone 25:50:1); m.p. 240–241 $^\circ C$ ;  $^1H$  NMR (500 MHz,  $CDCl_3$ ):  $\delta=2.86$  (dd,  $J=7.5, 17.0$  Hz, 1H, 2- $H^a$ ), 3.10 (dd,  $J=13.5, 17.0$  Hz,

1H, 2-H<sup>b</sup>), 3.62 (s, 3H, OCH<sub>3</sub>), 4.11 (dd,  $J=7.5$ , 14.0 Hz, 1H, 1-H), 6.59 (s, 1H), 6.75 (dd,  $J=1.0$ , 8.2 Hz, 1H), 6.80 (dd,  $J=2.0$ , 8.2 Hz, 1H), 6.87 (d,  $J=7.7$  Hz, 2H), 7.15 (t,  $J=8.2$  Hz, 1H), 7.28 (t,  $J=7.7$  Hz, 2H), 7.36 (t,  $J=7.2$  Hz, 1H), 7.59 (dt,  $J=1.5$ , 7.5 Hz, 1H), 7.66–7.72 (m, 2H), 7.76 (d,  $J=7.8$  Hz, 1H); <sup>13</sup>C NMR (125 MHz, CDCl<sub>3</sub>):  $\delta=39.3$  (C-2), 54.2 (C-1), 55.3 (OCH<sub>3</sub>), 75.1 (C-9b), 113.4, 114.1, 119.4, 122.2, 124.6, 128.6 (2C), 129.0, 129.5, 129.8 (2C), 130.1, 133.9, 134.5 (C<sub>q</sub>), 136.0 (C<sub>q</sub>), 136.8 (C<sub>q</sub>), 141.4 (C<sub>q</sub>), 159.4 (C<sub>q</sub>), 169.7 (C-3); IR (thin film):  $\tilde{\nu}=3063$ , 2938, 2835, 1746 s, 1602, 1584, 1492, 1466, 1455, 1432, 1344 s, 1314, 1294, 1245 s, 1213, 1177 s, 1138, 1107, 1086, 1065, 1050, 950, 796, 767, 734, 703, 663; HRMS (ESI):  $m/z$ : calcd for C<sub>23</sub>H<sub>20</sub>NO<sub>4</sub>S: 406.1113; found: 406.1126 [ $M+H$ ]<sup>+</sup>.

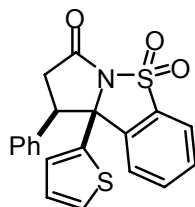

***rac*-(1*R*\*,9*bS*\*)-1-Phenyl-9*b*-(thiophen-2-yl)-1,2-dihydrobenzo[*d*]pyrrolo[1,2-*b*]isothiazol-3-one 5,5-dioxide** (table 1, entry 4). Prepared according to the General Procedure. Purification using hexanes/CH<sub>2</sub>Cl<sub>2</sub>/acetone (25:50:1 v/v/v) as the eluent afforded the product as a colorless solid in 90% yield.  $R_f=0.25$  (hexanes/CH<sub>2</sub>Cl<sub>2</sub>/acetone 25:50:1); m.p. 213–215°C; <sup>1</sup>H NMR (500 MHz, CDCl<sub>3</sub>):  $\delta=2.90$  (dd,  $J=7.0$ , 17.0 Hz, 1H, 2-H<sup>a</sup>), 3.33 (dd,  $J=14.0$ , 17.0 Hz, 1H, 2-H<sup>b</sup>), 4.06 (dd,  $J=7.0$ , 13.5 Hz, 1H, 1-H), 6.74 (dd,  $J=1.0$ , 3.6 Hz, 1H), 6.90 (dd,  $J=3.7$ , 4.9 Hz, 1H), 6.93 (d,  $J=7.3$  Hz, 2H), 7.23 (dd,  $J=1.0$ , 5.1 Hz, 1H), 7.31 (t,  $J=7.7$  Hz, 2H), 7.37 (t,  $J=7.3$  Hz, 1H), 7.56 (d,  $J=7.9$  Hz, 1H), 7.62 (t,  $J=7.4$  Hz, 1H), 7.71 (t,  $J=7.5$  Hz, 1H), 7.78 (d,  $J=7.8$  Hz, 1H); <sup>13</sup>C NMR (125 MHz, CDCl<sub>3</sub>):  $\delta=38.9$  (C-2), 54.2 (C-1), 73.9 (C-9b), 122.3, 124.1, 126.7, 127.1, 127.4, 128.7 (2C), 129.1, 129.5 (2C), 130.4, 134.0 (C<sub>q</sub>), 134.2, 135.4 (C<sub>q</sub>), 140.0 (C<sub>q</sub>), 140.5 (C<sub>q</sub>), 169.7 (C-3); IR (thin film):  $\tilde{\nu}=3064$ , 3033, 2926, 1752 s, 1582, 1497, 1467, 1455, 1431, 1415, 1345 s, 1314, 1281, 1249 s, 1213, 1177 s, 1135, 1095, 1080, 1065, 1032, 1008, 958, 939, 917, 897, 861, 836, 793, 768, 735, 701; HRMS (ESI):  $m/z$ : calcd for C<sub>20</sub>H<sub>15</sub>NNaO<sub>3</sub>S<sub>2</sub>: 404.0391; found: 404.0410 [ $M+Na$ ]<sup>+</sup>.

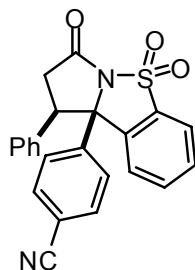

***rac*-(1*R*\*,9*bR*\*)-9*b*-(4-Cyanophenyl)-1-phenyl-1,2-dihydrobenzo[*d*]pyrrolo[1,2-*b*]isothiazol-3-one 5,5-dioxide** (table 1, entry 5). Prepared according to the General Procedure as a colorless solid in 83% yield.  $R_f=0.14$  (hexanes/ $\text{CH}_2\text{Cl}_2$ /acetone 25:50:1); m.p.  $>280^\circ\text{C}$ ;  $^1\text{H}$  NMR (500 MHz,  $\text{CDCl}_3$ ):  $\delta=2.92$  (dd,  $J=7.5, 17.0$  Hz, 1H, 2- $\text{H}^a$ ), 3.03 (dd,  $J=13.5, 17.0$  Hz, 1H, 2- $\text{H}^b$ ), 4.20 (dd,  $J=7.5, 13.5$  Hz, 1H, 1-H), 6.85 (d,  $J=7.4$  Hz, 2H), 7.25 (m, 2H), 7.31 (t,  $J=7.5$  Hz, 2H), 7.39 (t,  $J=7.4$  Hz, 1H), 7.51 (d,  $J=8.4$  Hz, 2H), 7.65 (t,  $J=7.4$  Hz, 1H), 7.71–7.77 (m, 2H), 7.80 (d,  $J=7.8$  Hz, 1H);  $^{13}\text{C}$  NMR (125 MHz,  $\text{DMSO-d}_6$ ):  $\delta=38.2$  (C-2), 52.0 (C-1), 74.5 (C-9*b*), 111.1, 118.2, 121.9, 125.1, 127.8 (2C), 128.3 (2C), 128.4, 129.7 (2C), 130.7, 132.0 (2C), 134.5, 134.9, 135.0, 140.1, 141.3, 170.1 (C-3); IR (thin film):  $\tilde{\nu}=3065, 2924, 2230, 1752$  s, 1607, 1582, 1502, 1469, 1455, 1406, 1344 s, 1316, 1245, 1210, 1177 s, 1138, 1099, 1067, 1019, 969, 943, 904, 835, 759, 736, 701, 662; HRMS (ESI):  $m/z$ : calcd for  $\text{C}_{23}\text{H}_{16}\text{N}_2\text{NaO}_3\text{S}$ : 423.0779; found: 423.0775 [ $M+\text{Na}$ ] $^+$ .

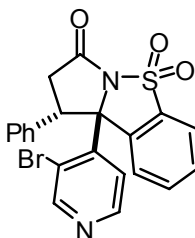

***rac*-(1*R*\*,9*bR*\*)-9*b*-(3-Bromopyridin-4-yl)-1-phenyl-1,2-dihydrobenzo[*d*]pyrrolo[1,2-*b*]isothiazol-3-one 5,5-dioxide** (table 1, entry 6). Prepared according to the General Procedure using 5 mol % catalyst **1** and  $\text{CH}_2\text{Cl}_2$ /acetone (50:1 v/v) as the eluent as a sticky, colorless solid in 77% yield.  $R_f=0.10$  ( $\text{CH}_2\text{Cl}_2$ /acetone 50:1); m.p.  $>280^\circ\text{C}$ ;  $^1\text{H}$  NMR (500 MHz,  $\text{CDCl}_3$ ):  $\delta=2.84$  (d,  $J=17.7$  Hz, 1H, 2- $\text{H}^a$ ), 3.06 (dd,  $J=7.8, 17.8$  Hz, 1H, 2- $\text{H}^b$ ), 5.35 (d,  $J=7.7$  Hz, 1H, 1-H), 7.16 (d,  $J=7.0$  Hz, 1H), 7.21 (t,  $J=7.1$  Hz, 2H), 7.28–7.33 (m, 2H), 7.36 (t,  $J=7.9$  Hz, 1H), 7.41 (t,  $J=7.6$  Hz, 1H), 7.64 (d,  $J=7.7$  Hz, 1H), 8.07 (d,  $J=5.2$  Hz, 1H), 8.14 (d,  $J=8.0$  Hz, 1H), 8.65 (d,  $J=5.3$  Hz, 1H), 8.92 (s, 1H);  $^{13}\text{C}$  NMR (125 MHz,  $\text{CDCl}_3$ ):  $\delta=40.8$  (C-2), 46.5 (C-1), 79.0 (C-9*b*), 117.7 (C<sub>q</sub>), 122.0, 123.9, 126.7, 127.5 (2C), 128.5, 129.2 (2C), 130.7, 133.5, 134.8 (C<sub>q</sub>), 136.4

(C<sub>q</sub>), 138.2 (C<sub>q</sub>), 147.9 (C<sub>q</sub>), 150.3, 155.5, 171.0 (C-3); IR (thin film):  $\tilde{\nu}$ =3035, 1752 s, 1574, 1496, 1466, 1455, 1394, 1344 s, 1313, 1287, 1231, 1210, 1177 s, 1138, 1102, 1066, 1021, 946, 830, 765, 736, 701; HRMS (ESI): *m/z*: calcd for C<sub>21</sub>H<sub>15</sub>BrN<sub>2</sub>NaO<sub>3</sub>S: 476.9884; found: 476.9923 [M+Na]<sup>+</sup>.

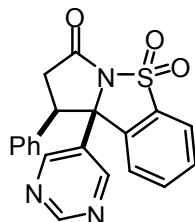

***rac*-(1*R*\*,9*bR*\*)-1-Phenyl-9*b*-(5-pyrimidinyl)-1,2-dihydrobenzo[*d*]pyrrolo[1,2-*b*]isothiazol-3-one 5,5-dioxide** (table 1, entry 7). Prepared according to the General Procedure using 5 mol % catalyst **1** and CH<sub>2</sub>Cl<sub>2</sub>/acetone (50:1→20:1→9:1 v/v) as the eluent as a colorless solid in 68% yield. *R*<sub>f</sub>=0.45 (CH<sub>2</sub>Cl<sub>2</sub>/acetone 9:1); m.p. >280°C; <sup>1</sup>H NMR (500 MHz, CDCl<sub>3</sub>):  $\delta$ =2.96 (dd, *J*=7.8, 17.2 Hz, 1H, 2-H<sup>a</sup>), 3.05 (dd, *J*=13.3, 17.2 Hz, 1H, 2-H<sup>b</sup>), 4.26 (dd, *J*=7.8, 13.3 Hz, 1H, 1-H), 6.92 (d, *J*=7.3 Hz, 2H), 7.37 (t, *J*=7.8 Hz, 2H), 7.43 (tt, *J*=1.2, 7.4 Hz, 1H), 7.68 (ddd, *J*=0.8, 8.1, 15.9 Hz, 2H), 7.78 (dt, *J*=1.1, 7.8 Hz, 1H), 7.83 (d, *J*=7.8 Hz, 1H), 8.47 (d, *J*=2.5 Hz, 2H), 9.13 (s, 1H); <sup>13</sup>C NMR (125 MHz, CDCl<sub>3</sub>):  $\delta$ =38.7 (C-2), 53.6 (C-1), 72.0 (C-9*b*), 122.7, 123.9, 129.4 (2C), 129.8 (2C), 129.89, 129.92 (C<sub>q</sub>), 131.0, 133.0 (C<sub>q</sub>), 134.6, 136.0 (C<sub>q</sub>), 139.9 (C<sub>q</sub>), 155.2 (2C), 158.6, 168.9 (C-3); IR (thin film):  $\tilde{\nu}$ =3089, 3062, 3035, 3008, 2924, 1756 s, 1574, 1558, 1499, 1469, 1451, 1420, 1347 s, 1313, 1289, 1244 s, 1219, 1177 s, 1154, 1141, 1119, 1093, 1083, 1066, 1059, 1042, 1032, 1013, 969, 952, 892, 804, 770, 748, 736, 725, 702, 663, 645; HRMS (ESI): *m/z*: calcd for C<sub>20</sub>H<sub>16</sub>N<sub>3</sub>O<sub>3</sub>S: 378.0912; found: 378.0915 [M+H]<sup>+</sup>.

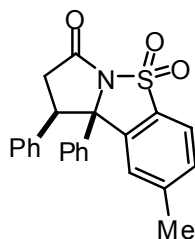

***rac*-(1*R*\*,9*bR*\*)-8-Methyl-1,9*b*-diphenyl-1,2-dihydrobenzo[*d*]pyrrolo[1,2-*b*]isothiazol-3-one 5,5-dioxide** (table 1, entry 8). Prepared according to the General Procedure using hexanes/CH<sub>2</sub>Cl<sub>2</sub>/acetone (25:50:1 v/v/v) as the eluent as a colorless solid in 96% yield. *R*<sub>f</sub>=0.21 (hexanes/CH<sub>2</sub>Cl<sub>2</sub>/acetone 25:50:1); m.p. >280°C; <sup>1</sup>H NMR (500 MHz, CDCl<sub>3</sub>):  $\delta$ =2.51 (s, 3H,

CH<sub>3</sub>), 2.85 (dd,  $J=7.3, 16.9$  Hz, 1H, 2-H<sup>a</sup>), 3.05 (dd,  $J=13.8, 16.9$  Hz, 1H, 2-H<sup>b</sup>), 4.11 (dd,  $J=7.2, 13.7$  Hz, 1H, 1-H), 6.82 (d,  $J=7.4$  Hz, 2H), 7.13 (d,  $J=7.5$  Hz, 2H), 7.20–7.30 (m, 5H), 7.33–7.39 (m, 2H), 7.45 (s, 1H), 7.63 (d,  $J=8.0$  Hz, 1H); <sup>13</sup>C NMR (125 MHz, CDCl<sub>3</sub>):  $\delta=22.4$  (CH<sub>3</sub>), 39.4 (C-2), 54.1 (C-1), 75.0 (C-9b), 122.0, 124.8, 127.1 (2C), 128.4 (2C), 128.5 (2C), 128.7, 128.9, 129.9 (2C), 130.9, 133.3 (C<sub>q</sub>), 134.5 (C<sub>q</sub>), 135.4 (C<sub>q</sub>), 141.8 (C<sub>q</sub>), 145.1 (C<sub>q</sub>), 169.8 (C-3); IR (thin film):  $\tilde{\nu}=3060, 3031, 2894, 1746$  s, 1595, 1496, 1454, 1447, 1413, 1388, 1345 s, 1310, 1249, 1227, 1176 s, 1151, 1117, 1080, 1067, 1033, 1003, 974, 962, 829, 802, 770, 736, 703, 669; HRMS (ESI):  $m/z$ : calcd for C<sub>23</sub>H<sub>20</sub>NO<sub>3</sub>S: 390.1164; found: 390.1148 [ $M+H$ ]<sup>+</sup>.

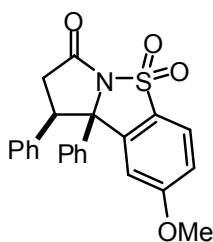

***rac*-(1*R*\*,9*bR*\*)-8-Methoxy-1,9*b*-diphenyl-1,2-dihydrobenzo[*d*]pyrrolo[1,2-*b*]isothiazol-3-one 5,5-dioxide** (table 1, entry 9). Prepared according to the General Procedure using hexanes/CH<sub>2</sub>Cl<sub>2</sub>/acetone (25:50:1 v/v/v) as the eluent as a colorless solid in 98% yield.  $R_f=0.10$  (hexanes/CH<sub>2</sub>Cl<sub>2</sub>/acetone 25:50:1); m.p. dec. >230°C; <sup>1</sup>H NMR (500 MHz, CDCl<sub>3</sub>):  $\delta=2.85$  (dd,  $J=7.3, 17.0$  Hz, 1H, 2-H<sup>a</sup>), 3.05 (dd,  $J=13.8, 16.9$  Hz, 1H, 2-H<sup>b</sup>), 3.90 (s, 3H, CH<sub>3</sub>), 4.12 (dd,  $J=7.2, 13.7$  Hz, 1H, 1-H), 6.83 (d,  $J=7.5$  Hz, 2H), 7.05 (dd,  $J=2.0, 8.7$  Hz, 1H), 7.10–7.14 (m, 3H), 7.20–7.30 (m, 5H), 7.34 (t,  $J=7.3$  Hz, 1H), 7.68 (d,  $J=8.7$  Hz, 1H); <sup>13</sup>C NMR (125 MHz, CDCl<sub>3</sub>):  $\delta=39.3$  (C-2), 54.1 (C-1), 56.2 (OCH<sub>3</sub>), 74.7 (C-9b), 110.5, 115.1, 123.8, 127.1 (2C), 128.0, 128.4 (2C), 128.5 (2C), 128.8, 129.0, 129.9 (2C), 134.4 (C<sub>q</sub>), 135.2 (C<sub>q</sub>), 143.7 (C<sub>q</sub>), 163.9 (C<sub>q</sub>), 169.7 (C-3); IR (thin film):  $\tilde{\nu}=3060, 3033, 2939, 2841, 1745$  s, 1594, 1495, 1480, 1455, 1446, 1428, 1340 s, 1288, 1250 s, 1214, 1179 s, 1146, 1103, 1072, 1020, 961, 864, 825, 802, 769, 753, 732, 703; HRMS (ESI):  $m/z$ : calcd for C<sub>23</sub>H<sub>20</sub>NO<sub>4</sub>S: 406.1113; found: 406.1118 [ $M+H$ ]<sup>+</sup>.

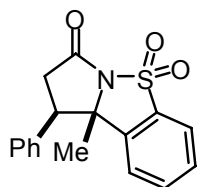

***rac*-(1*R*\*,9*bS*\*)-9*b*-Methyl-1-phenyl-1,2-dihydrobenzo[*d*]pyrrolo[1,2-*b*]isothiazol-3-one 5,5-dioxide** (table 1, entry 10). Prepared according to the General Procedure using 5 mol % catalyst **1**

and hexanes/CH<sub>2</sub>Cl<sub>2</sub>/acetone (25:50:1→0:50:1 v/v/v) as the eluent as a colorless solid in 72% yield. Small single crystals were obtained by slow evaporation of the solvent from a solution of 4.4 mg purified product in 1.5 mL CH<sub>2</sub>Cl<sub>2</sub>.  $R_f=0.44$  (CH<sub>2</sub>Cl<sub>2</sub>/acetone 50:1); m.p. >280°C; <sup>1</sup>H NMR (500 MHz, CDCl<sub>3</sub>):  $\delta=1.60$  (s, 3H), 2.90 (dd,  $J=7.4, 17.0$  Hz, 1H, 2-H<sup>a</sup>), 3.32 (dd,  $J=13.8, 17.0$  Hz, 1H, 2-H<sup>b</sup>), 3.79 (dd,  $J=7.4, 13.8$  Hz, 1H, 1-H), 7.15 (dd,  $J=1.7, 6.7$  Hz, 1H), 7.36–7.39 (m, 2H), 7.42–7.50 (m, 3H), 7.59–7.65 (m, 2H), 7.81 (dd,  $J=1.3, 6.7$  Hz, 1H); <sup>13</sup>C NMR (125 MHz, CDCl<sub>3</sub>):  $\delta=24.1$  (CH<sub>3</sub>), 39.1 (C-2), 52.2 (C-1), 71.1 (C-9b), 122.2, 123.6, 129.0, 129.2 (2C), 129.4 (2C), 130.2, 134.1, 134.5 (C<sub>q</sub>), 135.2 (C<sub>q</sub>), 141.8 (C<sub>q</sub>), 169.6 (C-3); IR (thin film):  $\tilde{\nu}=2925, 1735$  s, 1677, 1598, 1580, 1499, 1469, 1448, 1381, 1338 s, 1326, 1310, 1280, 1256, 1221, 1176 s, 1158, 1143, 1120, 1077, 1052, 1025, 998, 917, 899, 768, 752, 735, 703; HRMS (ESI):  $m/z$ : calcd for C<sub>17</sub>H<sub>16</sub>NO<sub>3</sub>S: 314.0851; found: 314.0858 [M+H]<sup>+</sup>.

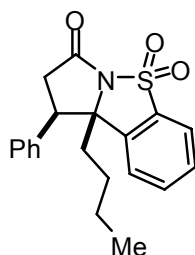

***rac*-(1*R*\*,9*bS*\*)-9*b*-*n*-Butyl-1-phenyl-1,2-dihydrobenzo[*d*]pyrrolo[1,2-*b*]isothiazol-3-one 5,5-dioxide** (table 1, entry 11). Prepared according to the General Procedure using 5 mol % catalyst **1** and hexanes/CH<sub>2</sub>Cl<sub>2</sub>/acetone (25:50:1) as the eluent as a colorless solid in 78% yield.  $R_f=0.27$  (hexanes/CH<sub>2</sub>Cl<sub>2</sub>/acetone 25:50:1); m.p. 88–89°C; <sup>1</sup>H NMR (500 MHz, CDCl<sub>3</sub>):  $\delta=0.48$ –0.55 (m, 1H), 0.72 (t,  $J=7.4$  Hz, 3H, CH<sub>3</sub>), 1.05–1.15 (m, 1H), 1.17–1.29 (m, 1H), 1.40–1.53 (m, 2H), 2.10–2.15 (m, 1H), 2.88 (dd,  $J=7.3, 17.0$  Hz, 1H, 2-H<sup>a</sup>), 3.38 (dd,  $J=14.1, 17.0$  Hz, 1H, 2-H<sup>b</sup>), 3.78 (dd,  $J=7.3, 14.0$  Hz, 1H, 1-H), 7.07 (d,  $J=7.1$  Hz, 1H), 7.32 (d,  $J=7.0$  Hz, 2H), 7.43–7.47 (m, 3H), 7.61–7.67 (m, 2H), 7.81 (d,  $J=7.7$  Hz, 1H); <sup>13</sup>C NMR (125 MHz, CDCl<sub>3</sub>):  $\delta=13.9, 22.7, 25.3, 35.4, 39.0, 53.8$  (C-1), 75.0 (C-9b), 122.3, 123.7, 128.9, 129.0 (2C), 129.5 (2C), 130.3, 134.1, 134.2 (C<sub>q</sub>), 135.5 (C<sub>q</sub>), 139.4 (C<sub>q</sub>), 171.1 (C-3); IR (thin film):  $\tilde{\nu}=3063, 3033, 2957, 2931, 2871, 1748$  s, 1601, 1582, 1499, 1469, 1455, 1420, 1370, 1337 s, 1315, 1266, 1249, 1240, 1217, 1174 s, 1156, 1138, 1096, 1056, 1030, 997, 955, 938, 912, 894, 811, 769, 737, 703, 674, 657, 642, 627, 619, 601; HRMS (ESI):  $m/z$ : calcd for C<sub>20</sub>H<sub>21</sub>NNaO<sub>3</sub>S: 378.1140; found: 378.1149 [M+Na]<sup>+</sup>.

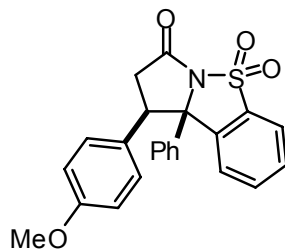

***rac*-(1*R*\*,9*bR*\*)-1-(4-Methoxyphenyl)-9*b*-phenyl-1,2-dihydrobenzo[*d*]pyrrolo[1,2-*b*]isothiazol-3-one 5,5-dioxide** (table 2, entry 1). Prepared according to the General Procedure as a colorless solid in 95% yield.  $R_f=0.22$  (hexanes/ $\text{CH}_2\text{Cl}_2$ /acetone 25:50:1); m.p. 175–176°C;  $^1\text{H}$  NMR (500 MHz,  $\text{CDCl}_3$ ):  $\delta=2.82$  (dd,  $J=7.2, 16.9$  Hz, 1H, 2- $\text{H}^a$ ), 3.00 (dd,  $J=13.9, 16.9$  Hz, 1H, 2- $\text{H}^b$ ), 3.82 (s, 3H,  $\text{OCH}_3$ ), 4.07 (dd,  $J=7.2, 13.8$  Hz, 1H, 1-H), 6.72 (d,  $J=8.6$  Hz, 2H), 6.78 (d,  $J=8.6$  Hz, 2H), 7.15 (d,  $J=7.5$  Hz, 2H), 7.22–7.30 (m, 3H), 7.56–7.60 (m, 1H), 7.67–7.72 (m, 2H), 7.76 (d,  $J=7.7$  Hz, 1H);  $^{13}\text{C}$  NMR (125 MHz,  $\text{CDCl}_3$ ):  $\delta=39.5$  (C-2), 53.6 (C-1), 55.5 ( $\text{OCH}_3$ ), 75.2 (C-9*b*), 113.9 (2C), 122.2, 124.6, 126.1 (C<sub>q</sub>), 127.2 (2C), 128.4 (2C), 128.7, 130.0, 130.9 (2C), 133.8, 135.3 (C<sub>q</sub>), 136.0 (C<sub>q</sub>), 141.5 (C<sub>q</sub>), 160.0 (C<sub>q</sub>), 169.8 (C-3); IR (thin film):  $\tilde{\nu}=3062, 3004, 2960, 2934, 2838, 1747$  s, 1611, 1583, 1515 s, 1496, 1464, 1451, 1444, 1428, 1344 s, 1309, 1295, 1254 s, 1215, 1177 s, 1138, 1113, 1102, 1080, 1066, 1033, 957, 833, 819, 775, 762, 735, 699, 660, 646, 633; HRMS (ESI):  $m/z$ : calcd for  $\text{C}_{23}\text{H}_{20}\text{NO}_4\text{S}$ : 406.1113; found: 406.1069 [ $M+\text{H}$ ] $^+$ .

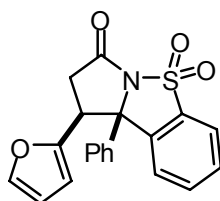

***rac*-(1*R*\*,9*bS*\*)-1-(2-Furyl)-9*b*-phenyl-1,2-dihydrobenzo[*d*]pyrrolo[1,2-*b*]isothiazol-3-one 5,5-dioxide** (table 2, entry 2). Prepared according to the General Procedure as a colorless solid in 98% yield.  $R_f=0.37$  (hexanes/ $\text{CH}_2\text{Cl}_2$ /acetone 15:50:1); m.p. 266–267°C (with dec.);  $^1\text{H}$  NMR (500 MHz,  $\text{CDCl}_3$ ):  $\delta=2.87$  (dd,  $J=7.5, 16.9$  Hz, 1H, 2- $\text{H}^a$ ), 3.06 (dd,  $J=13.7, 16.8$  Hz, 1H, 2- $\text{H}^b$ ), 4.23 (dd,  $J=7.4, 13.6$  Hz, 1H, 1-H), 6.00 (d,  $J=3.2$  Hz, 1H), 6.31 (dd,  $J=1.9, 3.2$  Hz, 1H), 7.16–7.19 (m, 2H), 7.19–7.24 (m, 3H), 7.44 (d,  $J=1.3$  Hz, 1H), 7.61 (t,  $J=7.6$  Hz, 1H), 7.76 (d,  $J=7.8$  Hz, 1H), 7.79 (dt,  $J=1.0, 7.8$  Hz, 1H), 8.21 (d,  $J=7.9$  Hz, 1H);  $^{13}\text{C}$  NMR (125 MHz,  $\text{CDCl}_3$ ):  $\delta=36.7$  (C-2), 47.1 (C-1), 75.1 (C-9*b*), 110.2, 111.1, 122.1, 125.2, 125.8 (2C), 128.56 (2C), 128.59, 130.2, 134.2, 135.90 (C<sub>q</sub>), 135.91 (C<sub>q</sub>), 141.1 (C<sub>q</sub>), 142.8, 148.8 (C<sub>q</sub>), 169.0 (C-3);



IR (thin film):  $\tilde{\nu}$ =3063, 2922, 1747 s, 1595, 1497, 1467, 1451, 1416, 1344 s, 1247, 1179 s, 1139, 1103, 1079, 1066, 1007, 977, 963, 937, 885, 858, 774, 757, 735, 703, 666, 640; HRMS (ESI):  $m/z$ : calcd for C<sub>20</sub>H<sub>15</sub>NNaO<sub>4</sub>S: 388.0619; found: 388.0577 [ $M+Na$ ]<sup>+</sup>.

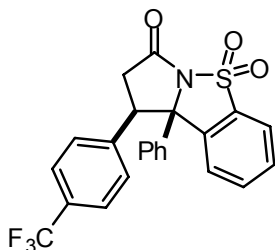

***rac*-(1*R*\*,9*bR*\*)-9*b*-Phenyl-1-(4-trifluoromethylphenyl)-1,2-dihydrobenzo[*d*]pyrrolo[1,2-*b*]isothiazol-3-one 5,5-dioxide** (table 2, entry 3). Prepared according to the General Procedure using hexanes/CH<sub>2</sub>Cl<sub>2</sub>/acetone (25:50:1) as the eluent as a colorless solid in 89% yield.  $R_f$ =0.30 (hexanes/CH<sub>2</sub>Cl<sub>2</sub>/acetone 25:50:1); m.p. 278°C; <sup>1</sup>H NMR (500 MHz, CDCl<sub>3</sub>):  $\delta$ =2.90 (dd,  $J$ =7.4, 16.9 Hz, 1H, 2-H<sup>a</sup>), 3.07 (dd,  $J$ =13.6, 16.9 Hz, 1H, 2-H<sup>b</sup>), 4.19 (dd,  $J$ =7.4, 13.6 Hz, 1H, 1-H), 6.93 (d,  $J$ =8.1 Hz, 2H), 7.15 (d,  $J$ =7.7 Hz, 2H), 7.24–7.28 (m, 2H), 7.30–7.34 (m, 1H), 7.51 (d,  $J$ =8.2 Hz, 2H), 7.61 (d,  $J$ =7.5 Hz, 1H), 7.64 (d,  $J$ =7.7 Hz, 1H), 7.73 (t,  $J$ =7.7 Hz, 1H), 7.78 (d,  $J$ =7.8 Hz, 1H); <sup>13</sup>C NMR (125 MHz, CDCl<sub>3</sub>):  $\delta$ =39.4 (C-2), 53.7 (C-1), 75.0 (C-9*b*), 122.4, 123.9 (q,  $J$ =270 Hz, CF<sub>3</sub>), 124.4, 125.5 (q,  $J$ =3.6 Hz, 2C, F<sub>3</sub>CCCH), 127.0 (2C), 128.7 (2C), 129.1, 130.2 (2C), 130.3, 131.2 (q,  $J$ =32.5 Hz, F<sub>3</sub>CC), 134.0, 134.9 (C<sub>q</sub>), 136.1 (C<sub>q</sub>), 138.7 (C<sub>q</sub>), 141.1 (C<sub>q</sub>), 169.1 (C-3); IR (thin film):  $\tilde{\nu}$ =3073, 2925, 2853, 1753 s, 1619, 1597, 1582, 1496, 1465, 1451, 1445, 1427, 1348 s, 1326 s, 1248, 1215, 1178 s, 1138, 1113, 1069 s, 1034, 1017, 1002, 952, 896, 882, 867, 859, 841, 815, 771, 763, 746, 735, 700, 683, 658, 646, 633, 612; HRMS (ESI):  $m/z$ : calcd for C<sub>23</sub>H<sub>16</sub>F<sub>3</sub>NNaO<sub>3</sub>S: 466.0701; found: 466.0668 [ $M+Na$ ]<sup>+</sup>.

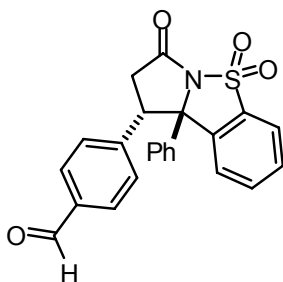

***rac*-(1*R*\*,9*bS*\*)-4-(9*b*-Phenyl-1,2-dihydrobenzo[*d*]pyrrolo[1,2-*b*]isothiazol-3-on-1-yl)benzaldehyde *S,S*-dioxide** (table 2, entry 4). Prepared according to the General Procedure using hexanes/CH<sub>2</sub>Cl<sub>2</sub>/acetone (25:50:1→0:50:1 v/v/v) as the eluent as a tan solid in 55% yield.

$R_f=0.45$  ( $\text{CH}_2\text{Cl}_2/\text{acetone}$  50:1); m.p.  $265^\circ\text{C}$  (with dec.);  $^1\text{H}$  NMR (500 MHz,  $\text{CDCl}_3$ ):  $\delta=2.80$  (d,  $J=17.5$  Hz, 1H, 2- $\text{H}^a$ ), 3.20 (dd,  $J=7.6, 17.5$  Hz, 1H, 2- $\text{H}^b$ ), 4.45 (d,  $J=7.5$  Hz, 1H, 1-H), 7.22–7.25 (m, 1H), 7.27–7.33 (m, 2H), 7.36–7.41 (m, 3H), 7.48 (t,  $J=8.2$  Hz, 2H), 7.54–7.57 (m, 1H), 7.69 (d,  $J=8.3$  Hz, 2H), 7.85 (d,  $J=8.1$  Hz, 2H), 9.86 (s, 1H, CHO);  $^{13}\text{C}$  NMR (125 MHz,  $\text{CDCl}_3$ ):  $\delta=40.8$  (C-2), 52.7 (C-1), 78.3 (C-9b), 121.8, 125.1 (2C), 125.4, 128.5 (2C), 129.1, 129.7 (2C), 130.0, 130.4 (2C), 133.6, 134.4 ( $\text{C}_q$ ), 136.0 ( $\text{C}_q$ ), 137.9 ( $\text{C}_q$ ), 141.1 ( $\text{C}_q$ ), 145.4 ( $\text{C}_q$ ), 171.2 (C-3), 191.5 (CHO); IR (thin film):  $\tilde{\nu}=3061, 3035, 2923, 2839, 2747, 1748$  s, 1703 s, 1649, 1608, 1577, 1493, 1469, 1451, 1428, 1412, 1392, 1341 s, 1314, 1284, 1250, 1233, 1213, 1197, 1174 s, 1137, 1115, 1101, 1080, 1067, 1033, 1017, 1000, 968, 958, 948, 846, 823, 760, 735, 700, 670, 653; HRMS (ESI):  $m/z$ : calcd for  $\text{C}_{23}\text{H}_{18}\text{NO}_4\text{S}$ : 404.0957; found: 404.0962 [ $M+\text{H}$ ] $^+$ .

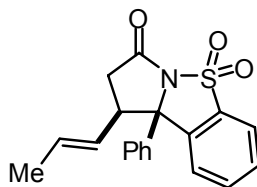

***rac*-(1*R*\*,9*bR*\*)-9*b*-Phenyl-1-(1-propenyl)-1,2-dihydrobenzo[*d*]pyrrolo[1,2-*b*]isothiazol-3-one 5,5-dioxide** (table 2, entry 5). Prepared according to the General Procedure using 5 mol % catalyst **1** as a colorless solid in 75% yield. The configuration of the alkene was predominantly *trans*.  $R_f=0.17$  (hexanes/ $\text{CH}_2\text{Cl}_2/\text{acetone}$  25:50:1); m.p. dec.  $>210^\circ\text{C}$ ;  $^1\text{H}$  NMR (500 MHz,  $\text{CDCl}_3$ ):  $\delta=1.76$  (dd,  $J=1.6, 6.6$  Hz, 3H,  $\text{CH}_3$ ), 2.63 (d,  $J=10.2$  Hz, 2H, 2- $\text{H}_2$ ), 3.43 (q,  $J=9.9$  Hz, 1H, 1-H), 5.04 (ddd,  $J=1.6, 9.3, 15.2$  Hz, 1H, 1-CH), 5.80 (qd,  $J=6.6, 15.2$  Hz, 1H,  $\text{CHCH}_3$ ), 7.35 (t,  $J=7.3$  Hz, 1H), 7.41 (t,  $J=7.2$  Hz, 2H), 7.53 (d,  $J=7.7$  Hz, 2H), 7.58 (t,  $J=7.5$  Hz, 1H), 7.70–7.76 (m, 2H), 7.85 (d,  $J=7.8$  Hz, 1H);  $^{13}\text{C}$  NMR (125 MHz,  $\text{CDCl}_3$ ):  $\delta=18.2$  ( $\text{CH}_3$ ), 39.2 (C-2), 51.7 (C-1), 74.1 (C-9b), 122.1, 124.0, 126.7 (2C), 127.4, 128.7, 128.8 (2C), 130.0, 131.3, 133.9, 135.7 ( $\text{C}_q$ ), 136.0 ( $\text{C}_q$ ), 141.9 ( $\text{C}_q$ ), 170.0 (C-3); IR (thin film):  $\tilde{\nu}=3089, 3061, 3025, 2915, 2855, 1747$  s, 1595, 1496, 1465, 1451, 1415, 1378, 1347 s, 1313, 1248 s, 1206, 1178 s, 1139, 1105, 1080, 1065, 965, 948, 838, 768, 734, 699, 664, 654, 642, 625; HRMS (ESI):  $m/z$ : calcd for  $\text{C}_{19}\text{H}_{17}\text{NNaO}_3\text{S}$ : 362.0827; found: 362.0838 [ $M+\text{Na}$ ] $^+$ .

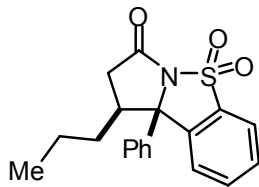

***rac*-(1*R*\*,9*bS*\*)-9*b*-Phenyl-1-(1-propyl)-1,2-dihydrobenzo[*d*]pyrrolo[1,2-*b*]isothiazol-3-one 5,5-dioxide** (table 2, entry 6). Prepared according to the General Procedure using 2.0 equiv enal, 5 mol % catalyst **1** and hexanes/CH<sub>2</sub>Cl<sub>2</sub>/acetone (25:50:1) as the eluent as a colorless solid in 96% yield.  $R_f=0.24$  (hexanes/CH<sub>2</sub>Cl<sub>2</sub>/acetone 25:50:1); m.p. 228°C (with dec.); <sup>1</sup>H NMR (500 MHz, CDCl<sub>3</sub>):  $\delta=0.88$  (t,  $J=7.3$  Hz, 3H, CH<sub>3</sub>), 0.88–0.97 (m, 1H), 1.18–1.34 (m, 2H), 1.73–1.79 (m, 1H), 2.48 (dd,  $J=12.8, 16.9$  Hz, 1H, 2-H<sup>a</sup>), 2.76 (dd,  $J=7.7, 16.9$  Hz, 1H, 2-H<sup>b</sup>), 2.82–2.89 (m, 1H, 1-H), 7.30–7.34 (m, 1H), 7.36–7.40 (m, 2H), 7.44–7.47 (m, 2H), 7.59 (dt,  $J=1.0, 7.7$  Hz, 1H), 7.72 (d,  $J=7.8$  Hz, 1H), 7.77 (dt,  $J=1.1, 7.6$  Hz, 1H), 7.89 (d,  $J=7.9$  Hz, 1H); <sup>13</sup>C NMR (125 MHz, CDCl<sub>3</sub>):  $\delta=14.1, 21.2, 34.2, 38.5, 47.2$  (C-1), 75.0 (C-9*b*), 122.3, 124.1, 126.6 (2C), 128.7, 128.9 (2C), 130.2, 133.9, 136.0 (C<sub>q</sub>), 136.4 (C<sub>q</sub>), 141.9 (C<sub>q</sub>), 170.5 (C-3); IR (thin film):  $\tilde{\nu}=3062, 2959, 2931, 2872, 1747$  s, 1597, 1583, 1496, 1466, 1451, 1419, 1346 s, 1312, 1244 s, 1206, 1179 s, 1140, 1100, 1080, 1065, 1033, 965, 938, 834, 767, 735, 700, 663, 632; HRMS (ESI):  $m/z$ : calcd for C<sub>19</sub>H<sub>19</sub>NNaO<sub>3</sub>S: 364.0983; found: 364.0993 [ $M+Na$ ]<sup>+</sup>.

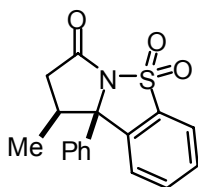

***rac*-(1*R*\*,9*bS*\*)-1-Methyl-9*b*-phenyl-1,2-dihydrobenzo[*d*]pyrrolo[1,2-*b*]isothiazol-3-one 5,5-dioxide** (table 2, entry 7). Prepared according to the General Procedure using 2.0 equiv enal and 5 mol % catalyst **1** as a colorless solid in 78% yield.  $R_f=0.25$  (hexanes/CH<sub>2</sub>Cl<sub>2</sub>/acetone 25:50:1); m.p. dec. >250°C; <sup>1</sup>H NMR (500 MHz, CDCl<sub>3</sub>):  $\delta=1.11$  (d,  $J=6.8$  Hz, 3H, CH<sub>3</sub>), 2.49 (dd,  $J=12.9, 17.0$  Hz, 1H, 2-H<sup>a</sup>), 2.69 (dd,  $J=7.6, 17.0$  Hz, 1H, 2-H<sup>a</sup>), 2.95–3.03 (m, 1H, 1-H), 7.34–7.36 (m, 1H), 7.41 (t,  $J=8.0$  Hz, 2H), 7.47–7.50 (m, 2H), 7.60 (t,  $J=7.8$  Hz, 1H), 7.74–7.78 (m, 2H), 7.86 (d,  $J=7.8$  Hz, 1H); <sup>13</sup>C NMR (125 MHz, CDCl<sub>3</sub>):  $\delta=16.5$  (CH<sub>3</sub>), 40.4, 42.3, 75.2 (C-9*b*), 122.3, 123.9, 126.6 (2C), 128.7, 129.0 (2C), 130.1, 133.8, 135.4 (C<sub>q</sub>), 136.4 (C<sub>q</sub>), 141.9 (C<sub>q</sub>), 170.4 (C-3); IR (thin film):  $\tilde{\nu}=2981, 2887, 1745$  s, 1599, 1496, 1468, 1450, 1419, 1387, 1342 s, 1244, 1219, 1176 s, 1141, 1100, 1081, 1063, 1032, 1000, 961, 952, 836, 769, 755, 733, 700, 674, 656; HRMS (ESI):  $m/z$ : calcd for C<sub>17</sub>H<sub>16</sub>NO<sub>3</sub>S: 314.0851; found: 314.0849 [ $M+H$ ]<sup>+</sup>.

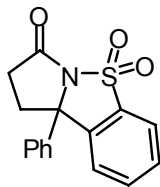

***rac*-9b-Phenyl-1,2-dihydrobenzo[*d*]pyrrolo[1,2-*b*]isothiazol-3-one 5,5-dioxide** (table 2, entry 8). Prepared according to the General Procedure using 5 mol % catalyst **1** and initially 1.5 equiv of enal. An additional portion (1.5 equiv) of enal was added after 6.5 h, which drove the reaction to completion within 21 h total reaction time. The product was obtained as a colorless solid in 80% yield.  $R_f=0.16$  (hexanes/CH<sub>2</sub>Cl<sub>2</sub>/acetone 25:50:1); m.p. 176–177°C; <sup>1</sup>H NMR (500 MHz, CDCl<sub>3</sub>):  $\delta=2.60$ – $2.74$  (m, 3H), 3.11–3.16 (m, 1H), 7.34 (t,  $J=7.3$  Hz, 1H), 7.42 (t,  $J=7.3$  Hz, 2H), 7.54 (dt,  $J=0.9, 7.9$  Hz, 1H), 7.59 (d,  $J=7.9$  Hz, 1H), 7.66 (dt,  $J=1.1, 7.8$  Hz, 1H), 7.69–7.72 (m, 2H), 7.75 (d,  $J=7.7$  Hz, 1H); <sup>13</sup>C NMR (125 MHz, CDCl<sub>3</sub>):  $\delta=33.5$  (CH<sub>2</sub>), 37.0 (CH<sub>2</sub>), 74.1 (C-9b), 122.2, 123.9, 125.3 (2C), 128.8, 129.4 (2C), 130.2, 134.5, 134.6 (C<sub>q</sub>), 140.1 (C<sub>q</sub>), 141.6 (C<sub>q</sub>), 171.8 (C-3); IR (thin film):  $\tilde{\nu}=3062, 2925, 1752$  s, 1493, 1468, 1451, 1341 s, 1288, 1252, 1228 s, 1181 s, 1160, 1140, 1100, 1066, 961, 766, 733, 699, 659, 630, 608; HRMS (ESI):  $m/z$ : calcd for C<sub>16</sub>H<sub>14</sub>NO<sub>3</sub>S: 300.0694; found: 300.0681 [M+H]<sup>+</sup>.

### Deprotection of the Annulation Product.

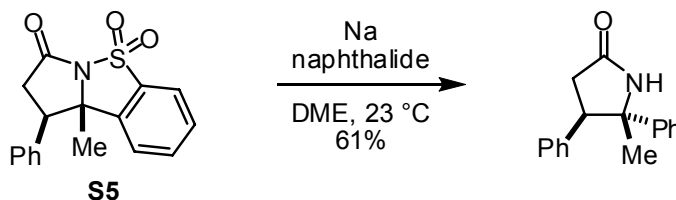

***rac*-(4*R*\*,5*S*\*)-5-Methyl-4,5-diphenylpyrrolidin-2-one** (eq 2). Sodium metal (138 mg, 6.0 mmol) was weighed in hexanes and added to a solution of naphthalene (846 mg, 6.6 mmol) in dry DME (20 mL). It was stirred for 4 h at 23 °C during which the metal slowly dissolved to give a 0.3 M solution of sodium naphthalide.

The reagent solution (1.5 mL, 0.45 mmol, 6.0 equiv) was transferred with a syringe into a Schlenk flask, diluted with DME (1 mL) and the solid lactam **S5** (23.5 mg, 0.075 mmol, 1.0 equiv) was added in one portion. After 90 seconds the reaction was quenched with 5% aqueous NaH<sub>2</sub>PO<sub>4</sub> (3 mL) and extracted with EtOAc (3 x 10 mL). The combined organic layers were washed with brine (10 mL) and dried with MgSO<sub>4</sub>. The solvents were evaporated and the

residue was purified by column chromatography (3 g silica gel, hexanes/acetone 3:1→1.5:1 v/v) to give the product (11.4 mg, 61%) as a colorless solid.  $R_f=0.28$  (hexanes/acetone 2:1); m.p. 178–179°C;  $^1\text{H}$  NMR (500 MHz,  $\text{CDCl}_3$ ):  $\delta=1.28$  (s, 3H), 2.72 (dd,  $J=8.3, 16.9$  Hz, 1H, 3-H<sup>a</sup>), 2.85 (dd,  $J=9.4, 17.0$  Hz, 1H, 3-H<sup>b</sup>), 3.65 (t,  $J=8.9$  Hz, 1H, 4-H), 6.02 (s, br, 1H, NH), 7.01–7.04 (m, 2H), 7.27–7.32 (m, 3H), 7.32–7.36 (m, 3H), 7.37–7.41 (m, 2H);  $^{13}\text{C}$  NMR (125 MHz,  $\text{CDCl}_3$ ):  $\delta=23.6$  ( $\text{CH}_3$ ), 35.8 (C-3), 54.2 (C-4), 65.0 (C-5), 125.5 (2C), 127.67, 127.69, 128.51 (2C), 128.53 (2C), 128.8 (2C), 137.6 (C<sub>q</sub>), 145.7 (C<sub>q</sub>), 176.5 (C-2); IR (thin film):  $\tilde{\nu}=3209, 3086, 3061, 3030, 2972, 2931, 2872, 1693$  s, 1601, 1583, 1496, 1454, 1446, 1420, 1378, 1359, 1305, 1282, 1252, 1228, 1186, 1155, 1145, 1082, 1073, 1028, 909, 768, 759, 733, 729, 721, 698 s, 651; HRMS (ESI):  $m/z$ : calcd for  $\text{C}_{17}\text{H}_{17}\text{NNaO}$ : 274.1208; found: 274.1211 [ $M+\text{Na}$ ]<sup>+</sup>.

**Determination of the relative configuration by x-ray analysis.**

The relative configuration of two  $\gamma$ -lactam compounds was determined by x-ray crystallography (figure S-1 and S-2). The configuration of the other reaction products were assigned by analogy according to the specific  $^1\text{H}$  NMR signals of the lactam methylene and methine protons. See the corresponding CIF files for further information.

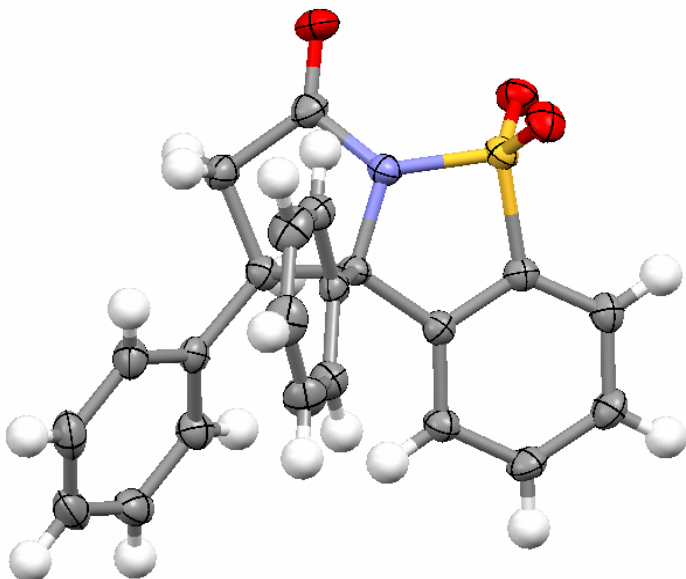

*Crystal Data:*  $\text{C}_{17}\text{H}_{15}\text{NSO}_3$ ,  
 $M = 313.37$ , orthorhombic,  $P2_12_12_1$ ,  
 $a = 7.2823(5) \text{ \AA}$ ,  $b = 8.0024(6) \text{ \AA}$ ,  
 $c = 24.632(2) \text{ \AA}$ ,  $V = 1435.4(2) \text{ \AA}^3$ ,  
 $Z = 4$ ,  $D_{\text{calcd}} = 1.450 \text{ g/cm}^3$ , 9538  
collected reflections, 9538 unique  
( $R_{\text{int}} = 0.0000$ ),  $R_1 = 0.0480$ ,  
 $wR_2 = 0.1215$  (for all unique).

Figure S-1. ORTEP representation of the diphenyl substituted  $\gamma$ -lactam (table 1, entry 1).

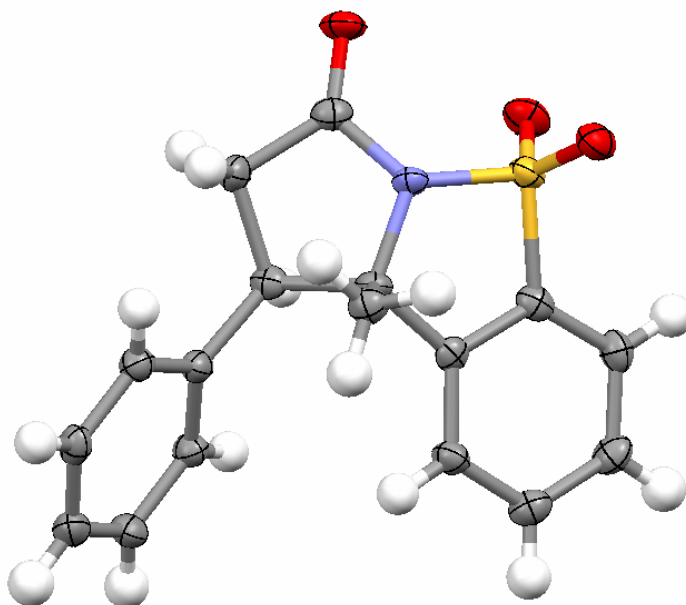

*Crystal Data:*  $\text{C}_{22}\text{H}_{17}\text{NSO}_3$ ,  
 $M = 375.44$ , monoclinic,  $P2_1/c$ ,  
 $a = 16.6026(13) \text{ \AA}$ ,  $b = 17.9592(13) \text{ \AA}$ ,  
 $c = 12.9034(10) \text{ \AA}$ ,  $\beta = 108.505(2)^\circ$ ,  
 $V = 3648.5(5) \text{ \AA}^3$ ,  $Z = 8$ ,  
 $D_{\text{calcd}} = 1.367 \text{ g/cm}^3$ , 23317 collected  
reflections, 6411 unique  
( $R_{\text{int}} = 0.0311$ ),  $R_1 = 0.0562$ ,  
 $wR_2 = 0.1098$  (for all unique).

Figure S-2. ORTEP representation of the methyl phenyl substituted  $\gamma$ -lactam (table 1, entry 10).

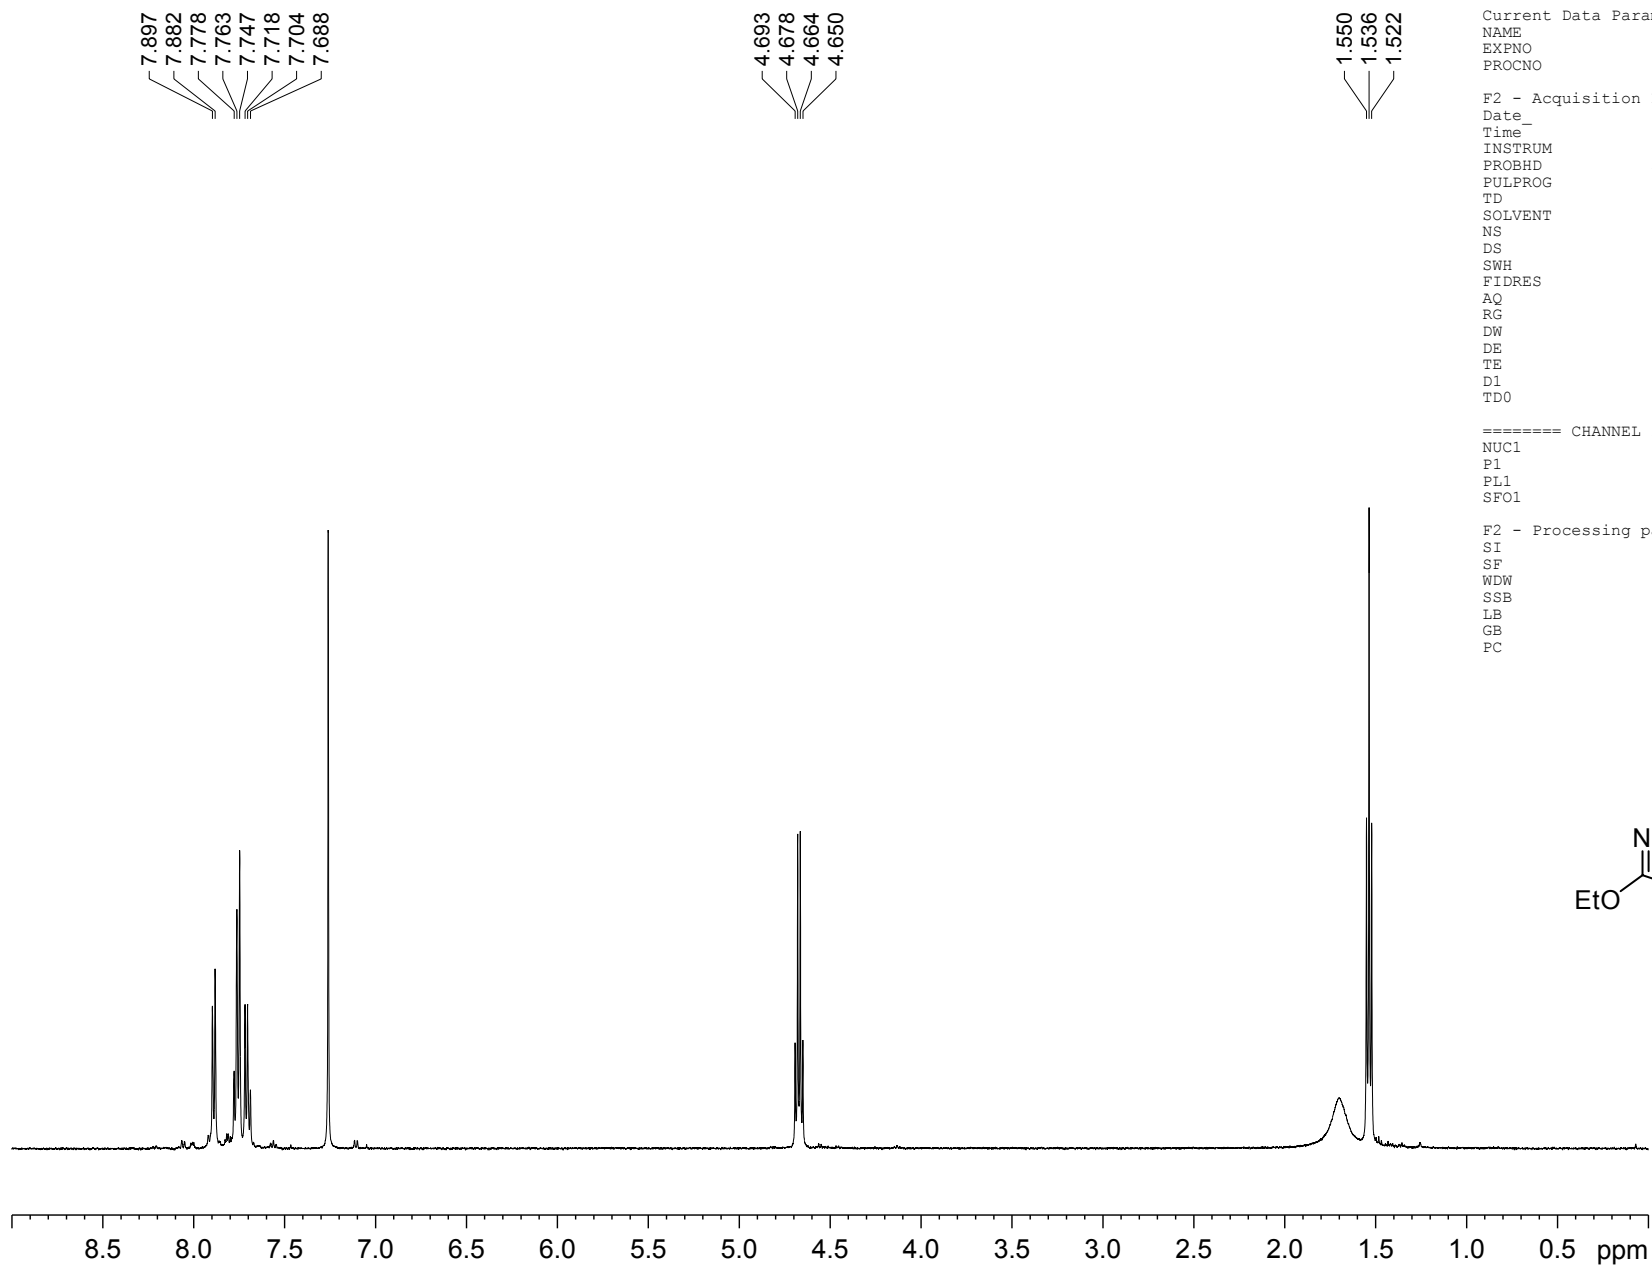

## Current Data Parameters

NAME FT118  
EXPNO 1  
PROCNO 1

## F2 - Acquisition Parameters

Date\_ 20081004  
Time 10.47  
INSTRUM spect  
PROBHD 5 mm DUL D/1H-  
PULPROG zg30  
TD 65536  
SOLVENT CDCl3  
NS 8  
DS 2  
SWH 7002.801 Hz  
FIDRES 0.106854 Hz  
AQ 4.6793203 sec  
RG 1030  
DW 71.400 usec  
DE 6.50 usec  
TE 300.0 K  
D1 1.0000000 sec  
TD0 1

## ===== CHANNEL f1 =====

NUC1 1H  
P1 10.00 usec  
PL1 -2.00 dB  
SFO1 500.3932525 MHz

## F2 - Processing parameters

SI 32768  
SF 500.3900160 MHz  
WDW EM  
SSB 0  
LB 0.30 Hz  
GB 0  
PC 1.00

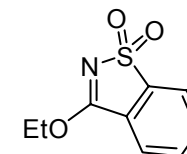

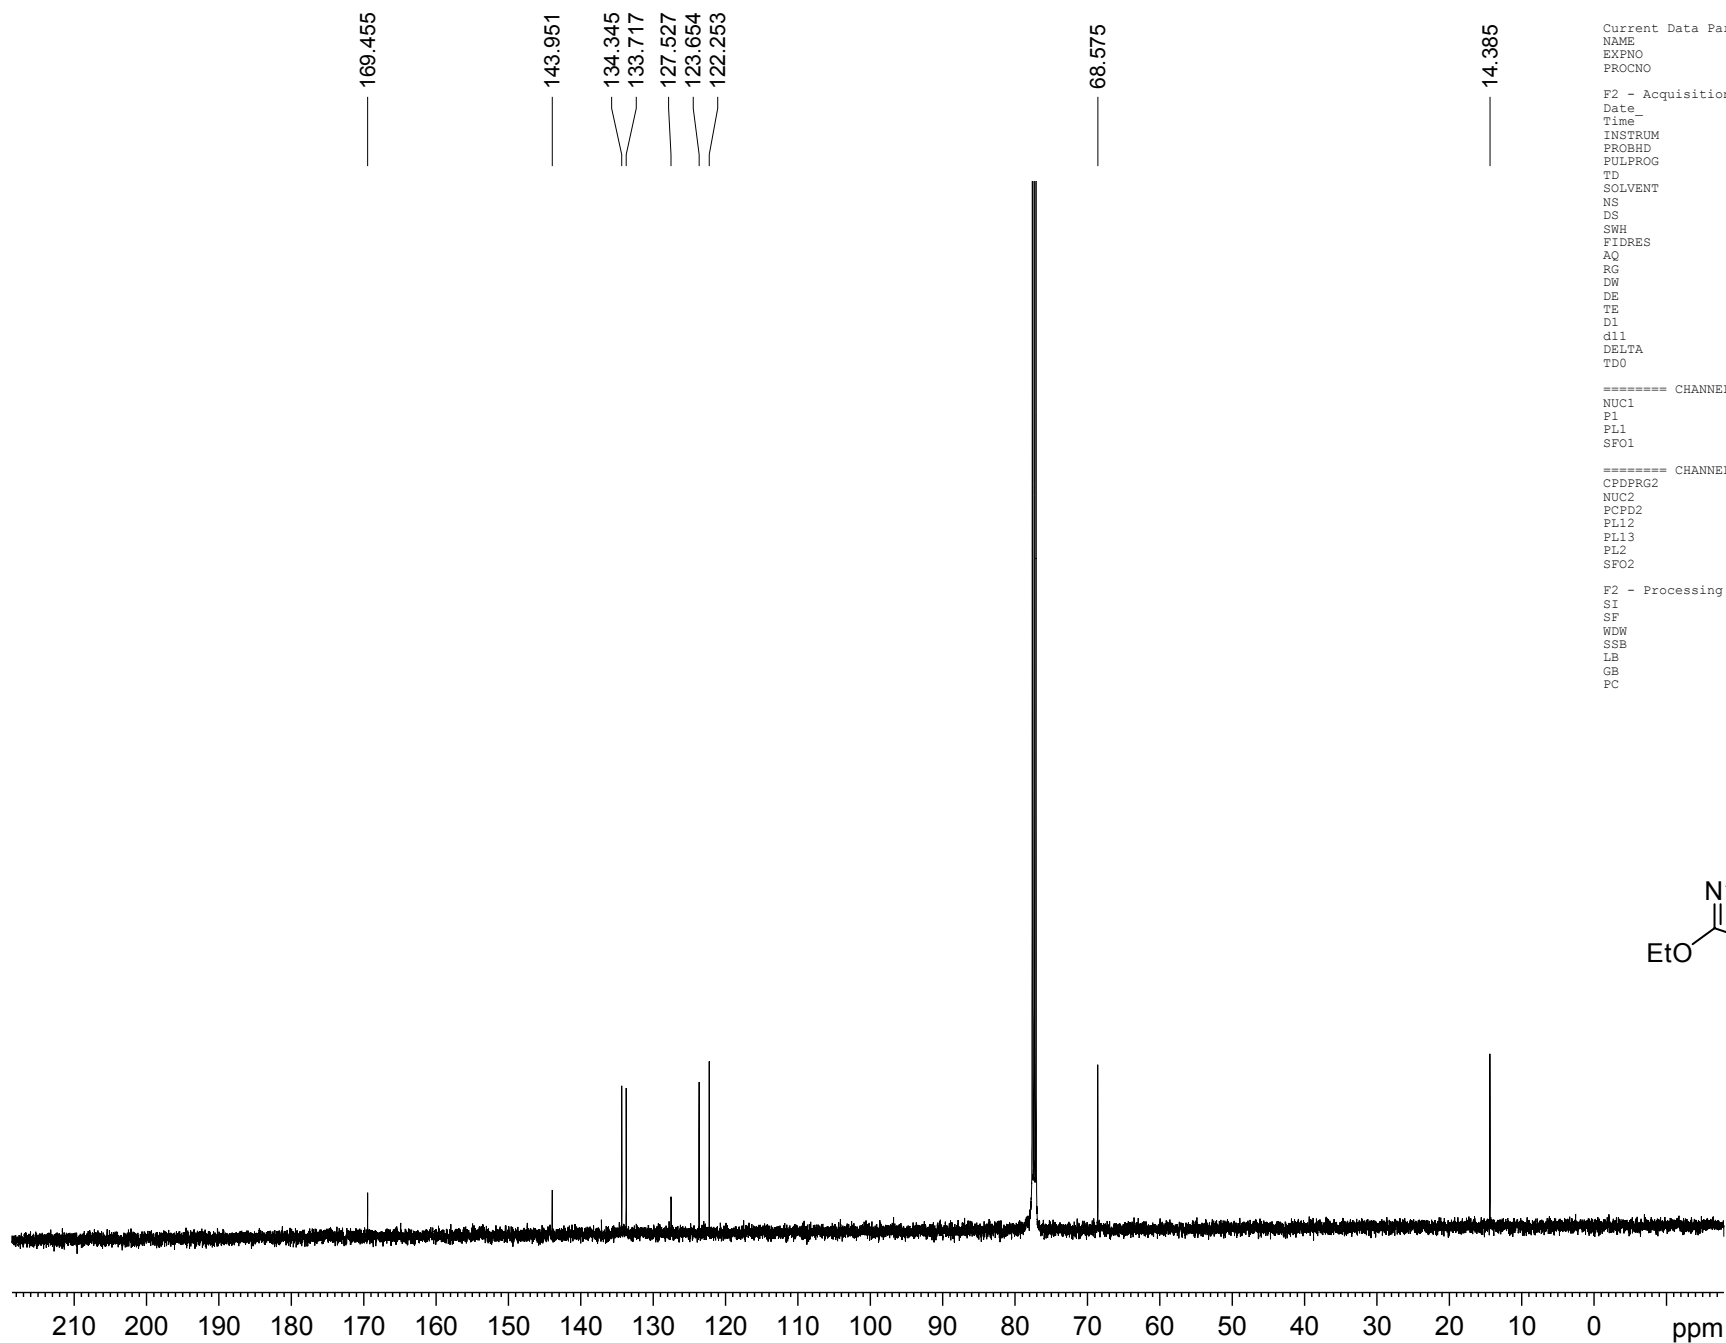

```
Current Data Parameters
NAME          FT118
EXPNO         2
PROCNO        1

F2 - Acquisition Parameters
Date_         20081004
Time          12.03
INSTRUM       spect
PROBHD        5 mm DUL D/1H-
PULPROG       zgpg30
TD            65536
SOLVENT       CDCl3
NS            1407
DS            4
SWH           29761.904 Hz
FIDRES        0.454131 Hz
AQ            1.1010548 sec
RG            456
DW            16.800 usec
DE            6.50 usec
TE            298.3 K
D1            2.00000000 sec
d11           0.03000000 sec
DELTA         1.89999998 sec
TDO           1

===== CHANNEL f1 =====
NUC1          13C
P1            10.00 usec
PL1           0.00 dB
SFO1          125.8357479 MHz

===== CHANNEL f2 =====
CPDPRG2       waltz16
NUC2          1H
PCPD2         60.00 usec
PL12          13.56 dB
PL13          120.00 dB
PL2           -2.00 dB
SFO2          500.3920016 MHz

F2 - Processing parameters
SI            32768
SF            125.8231236 MHz
WDW           EM
SSB           0
LB            1.00 Hz
GB            0
PC            1.40
```

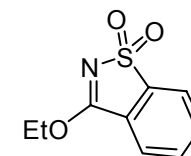



8.017  
8.016  
7.986  
7.976  
7.972  
7.969  
7.917  
7.915  
7.901  
7.808  
7.795  
7.793  
7.781  
7.779  
7.764  
7.762  
7.749  
7.747  
7.734  
7.732  
7.720  
7.717  
7.704  
7.690  
7.687  
7.632  
7.617  
7.605  
7.602  
7.601

8.031  
8.017  
8.016  
7.986  
7.976  
7.972  
7.969  
7.917  
7.915  
7.901  
7.808  
7.795  
7.793  
7.781  
7.779  
7.764  
7.762  
7.749  
7.747  
7.732  
7.720  
7.704  
7.690  
7.687  
7.632  
7.617  
7.605  
7.602  
7.601

```
Current Data Parameters
NAME          FT474
EXPNO         1
PROCNO        1

F2 - Acquisition Parameters
Date_         20080521
Time          18.16
INSTRUM       spect
PROBHD        5 mm PABBO BB-
PULPROG       zg30
TD            65536
SOLVENT       CDCl3
NS            8
DS            2
SWH           7002.801 Hz
FIDRES        0.106854 Hz
AQ            4.6793203 sec
RG            1150
DW            71.400 usec
DE            6.50 usec
TE            298.3 K
D1            1.00000000 sec
TDO           1

===== CHANNEL f1 =====
NUC1          1H
P1            10.76 usec
PL1           0.00 dB
SFO1          500.3932525 MHz

F2 - Processing parameters
SI            32768
SF            500.3900169 MHz
WDW           EM
SSB           0
LB            0.30 Hz
GB            0
PC            1.00
```

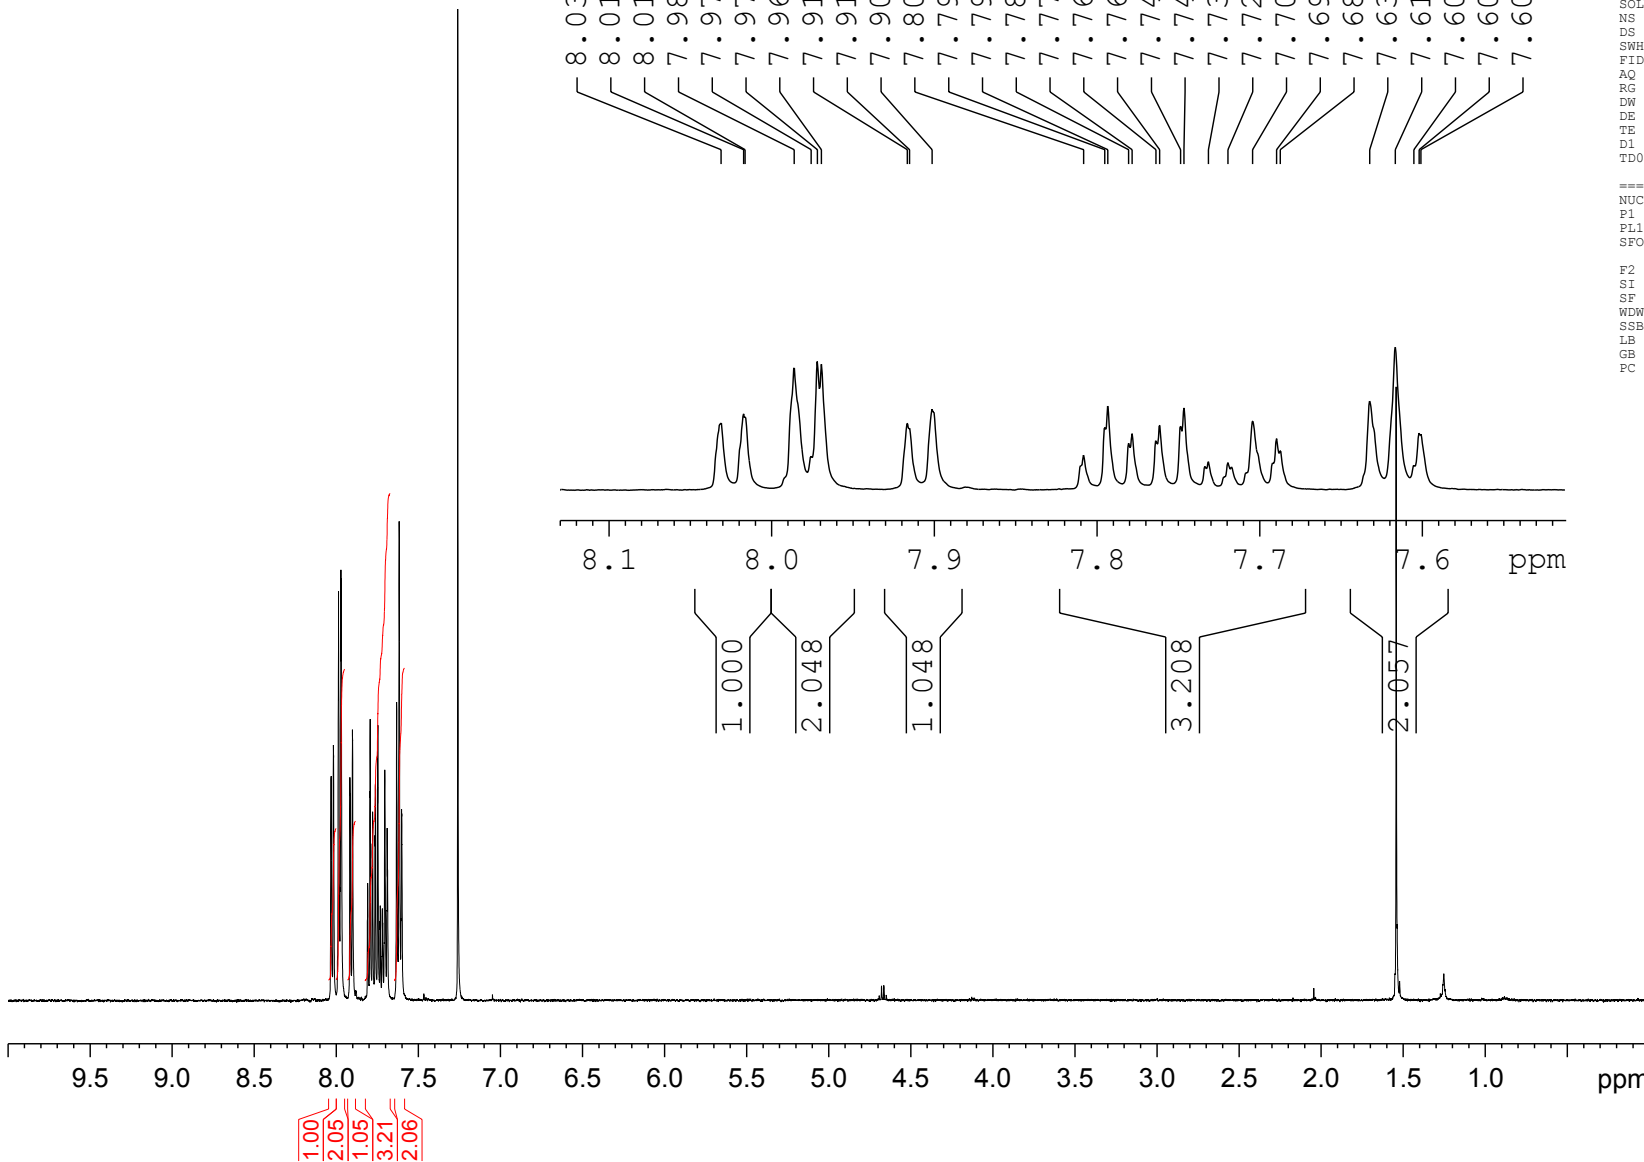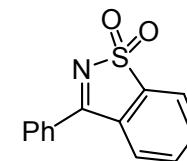

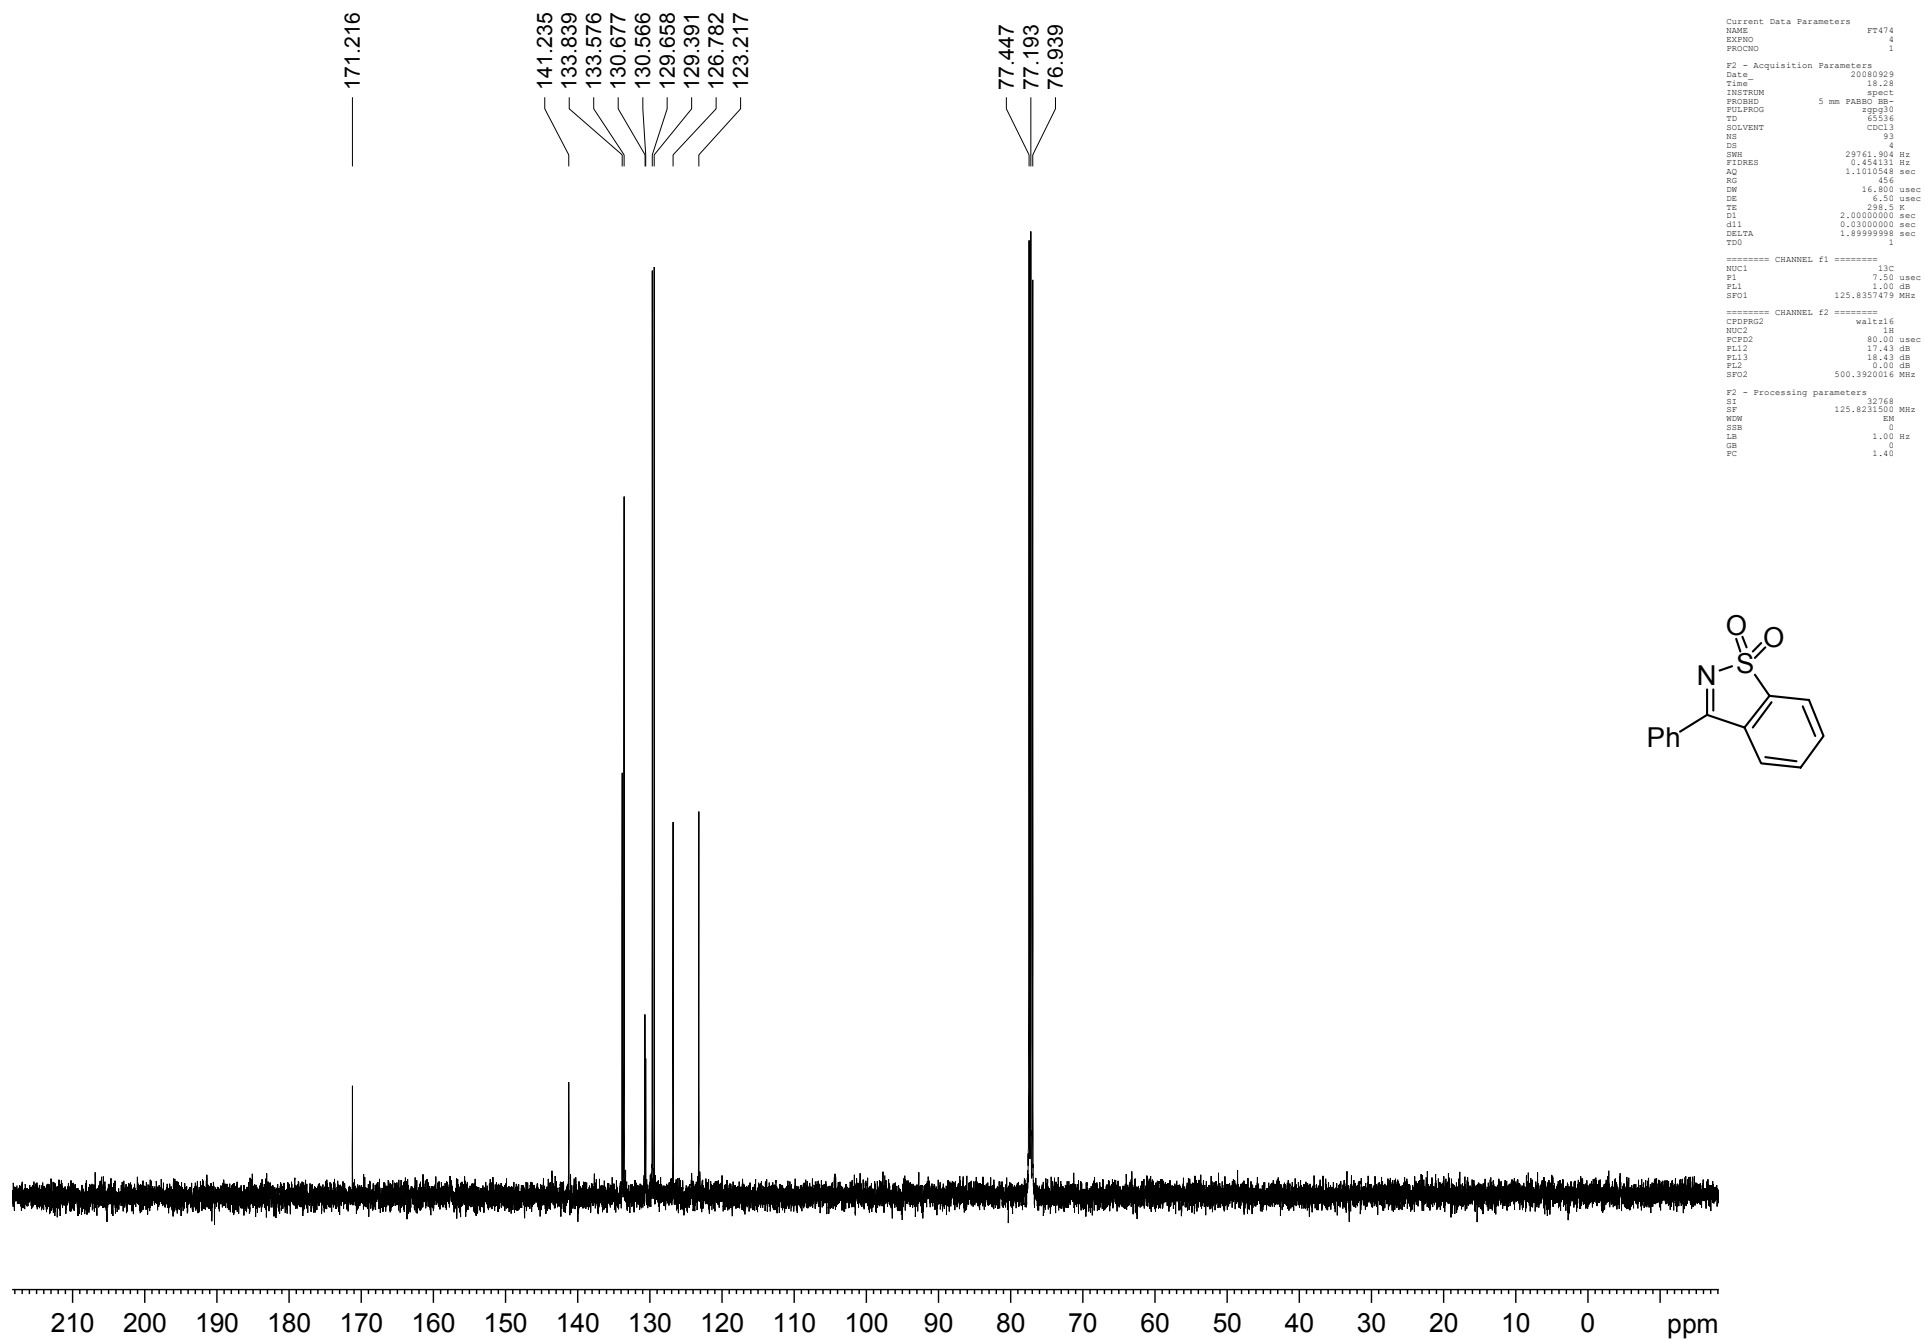

```
Current Data Parameters F7474
NAME
EXPNO 4
PROCNO 1

F2 - Acquisition Parameters
Date_
Time 20080929
INSTRUM spect
PROBHD 5 mm PABBO BB-
PULPROG zgpg30
TD 65536
SOLVENT cdcl3
NS 93
DS 4
SWH 29761.904 Hz
FIDRES 0.454131 Hz
AQ 1.101058 sec
RG 456
AQ 16.800 usec
DE 6.50 usec
TE 298.2 K
D1 2.0000000 sec
d11 0.0300000 sec
DELTA 1.8999999 sec
TD0 1

===== CHANNEL f1 =====
NUC1 13C
P1 7.50 usec
PL1 1.00 dB
SFO1 125.8357479 MHz

===== CHANNEL f2 =====
PCPD2 waitz16
NUC2 1H
PCPD2 80.00 usec
PL12 17.43 dB
PL13 18.43 dB
PL2 0.00 dB
SFO2 500.392016 MHz

F2 - Processing parameters
SI 32768
SF 125.8231500 MHz
WDW EM
SSB 0
LB 1.00 Hz
GB 0
PC 1.40
```

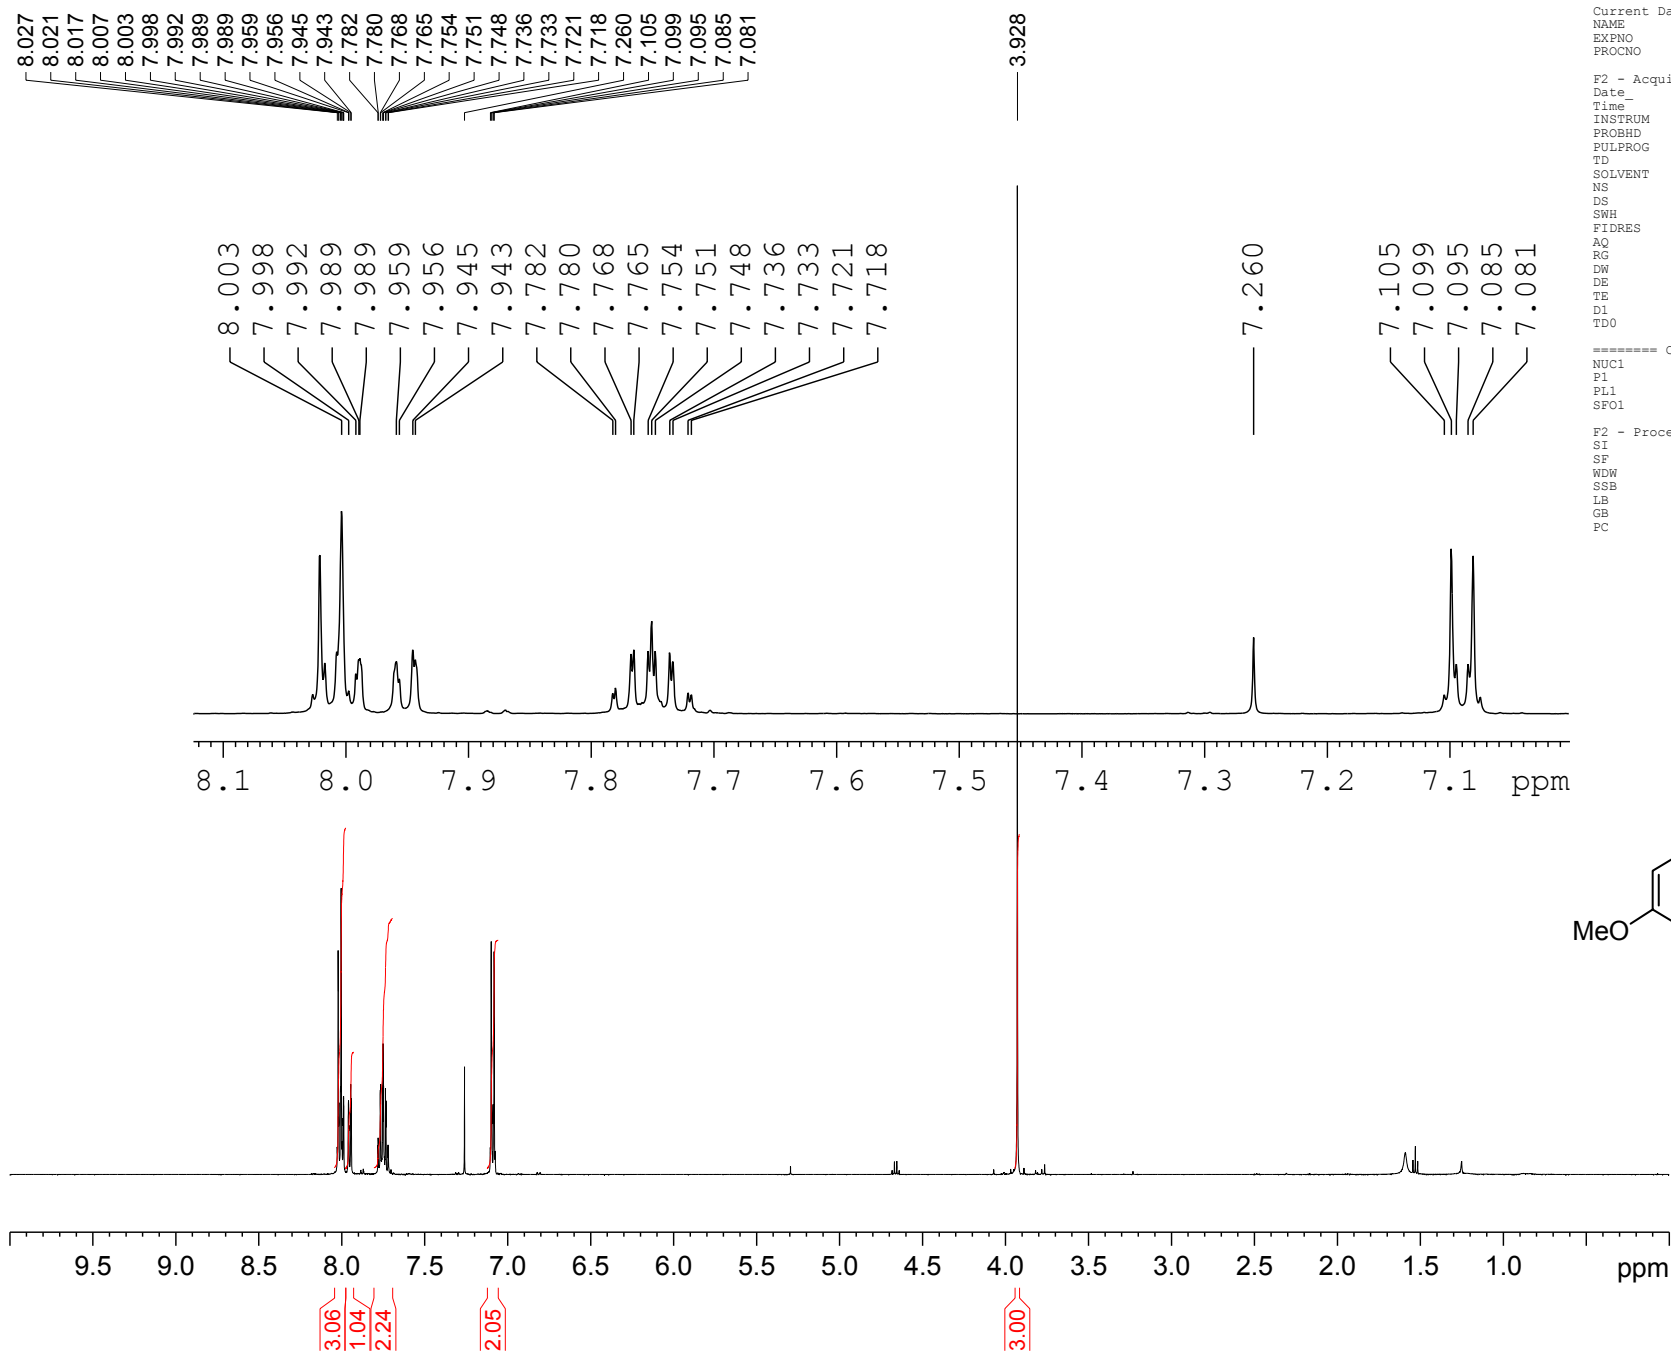

```

Current Data Parameters  FT208
NAME                     1
EXPNO                    1
PROCNO                   1

F2 - Acquisition Parameters
Date_                    20080918
Time_                    16.56
INSTRUM                  spect
PROBHD                   5 mm PABBO BB-
PULPROG                  zg30
TD                       65536
SOLVENT                  CDCl3
NS                       8
DS                       2
SWH                      7002.801 Hz
FIDRES                   0.106854 Hz
AQ                       4.6793203 sec
RG                       322
DW                      71.400 usec
DE                       6.50 usec
TE                      298.2 K
D1                      1.00000000 sec
TDO                      1

===== CHANNEL f1 =====
NUC1                      1H
P1                       10.76 usec
PL1                      0.00 dB
SFO1                     500.3932525 MHz

F2 - Processing parameters
SI                       32768
SF                       500.3900160 MHz
WDW                      EM
SSB                      0
LB                       0.30 Hz
GB                       0
PC                       1.00
  
```

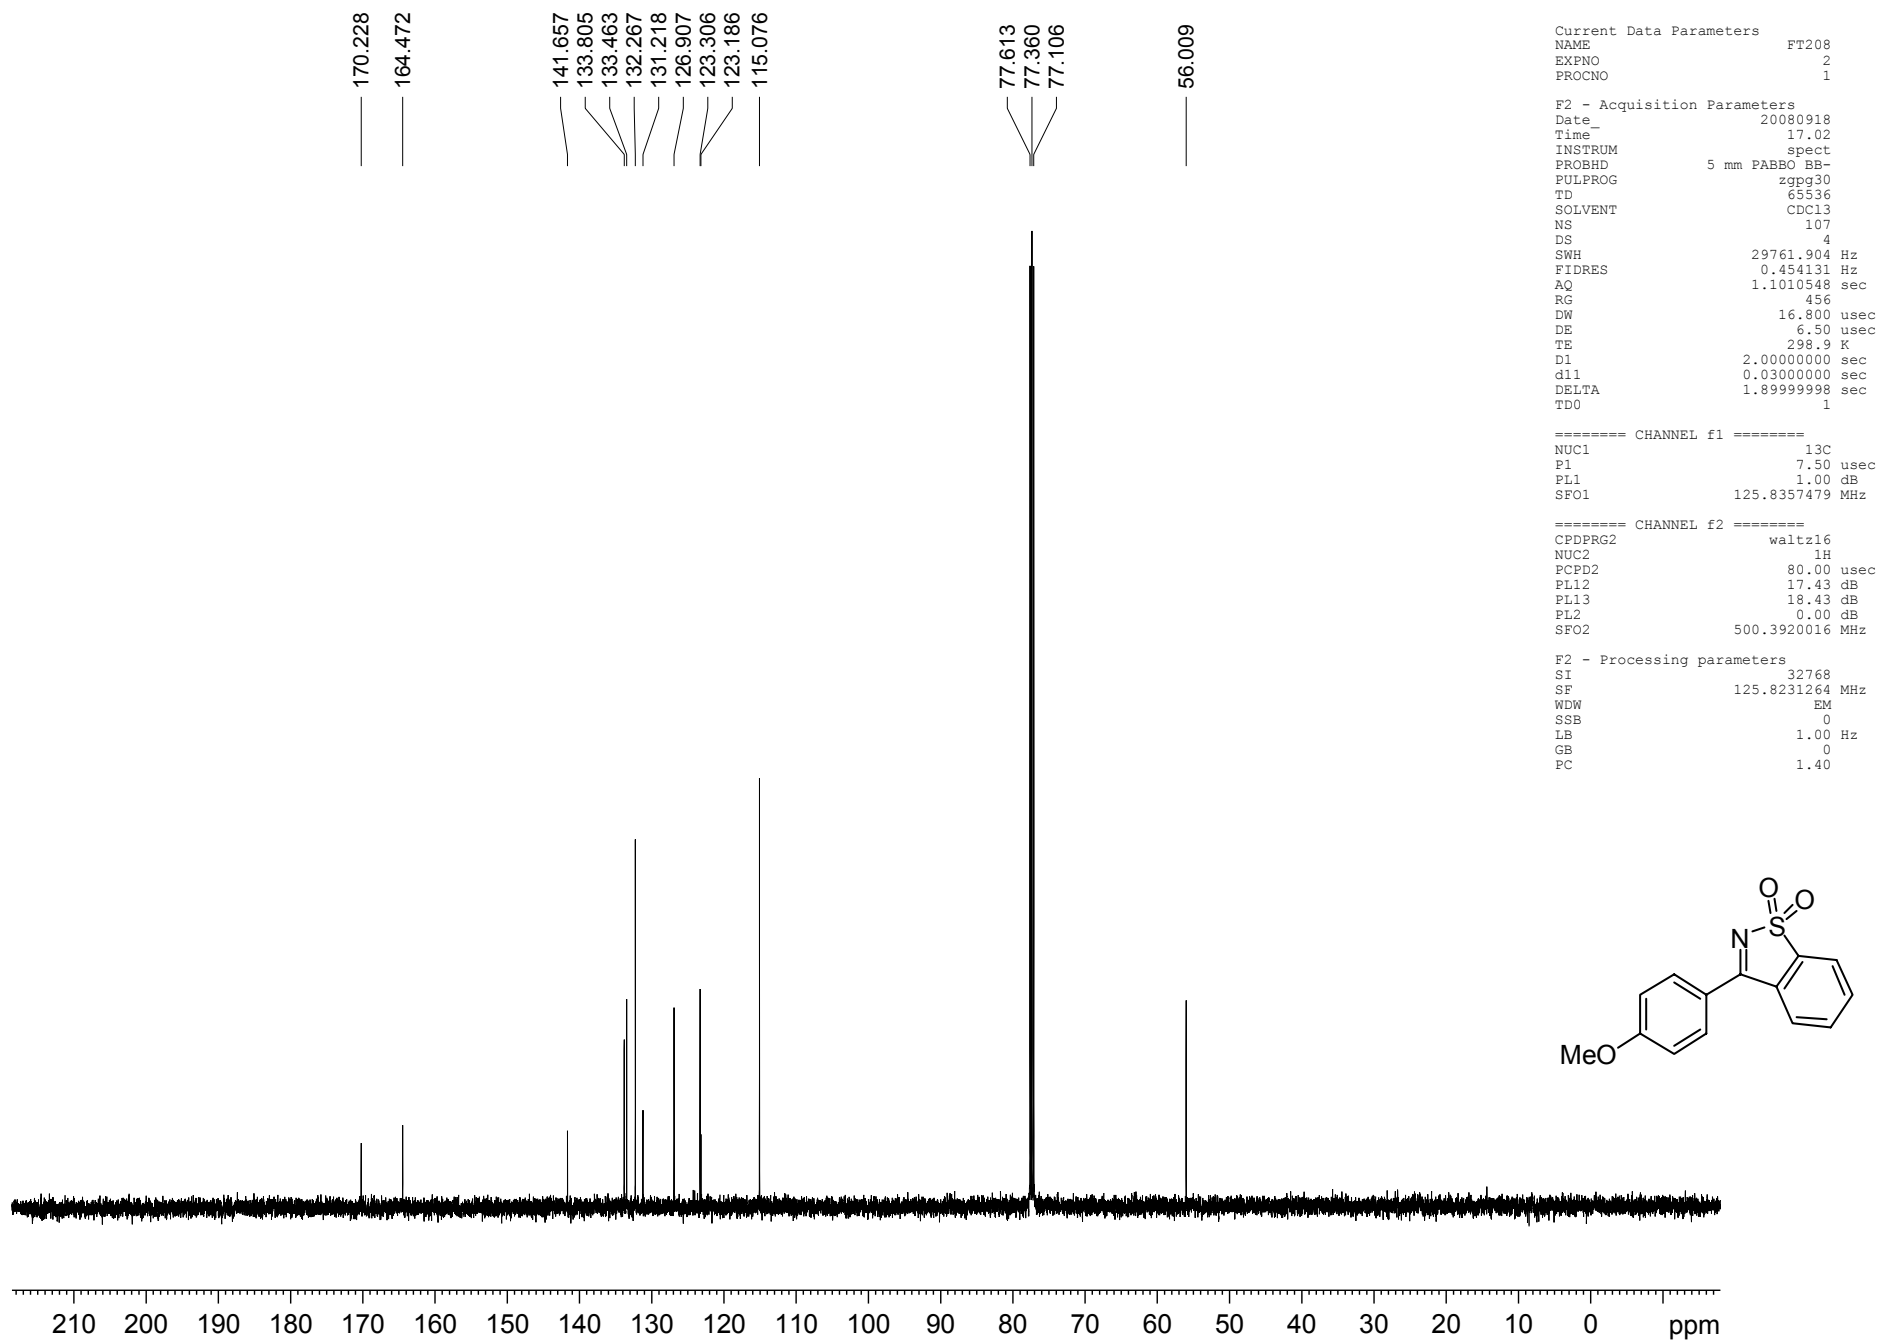

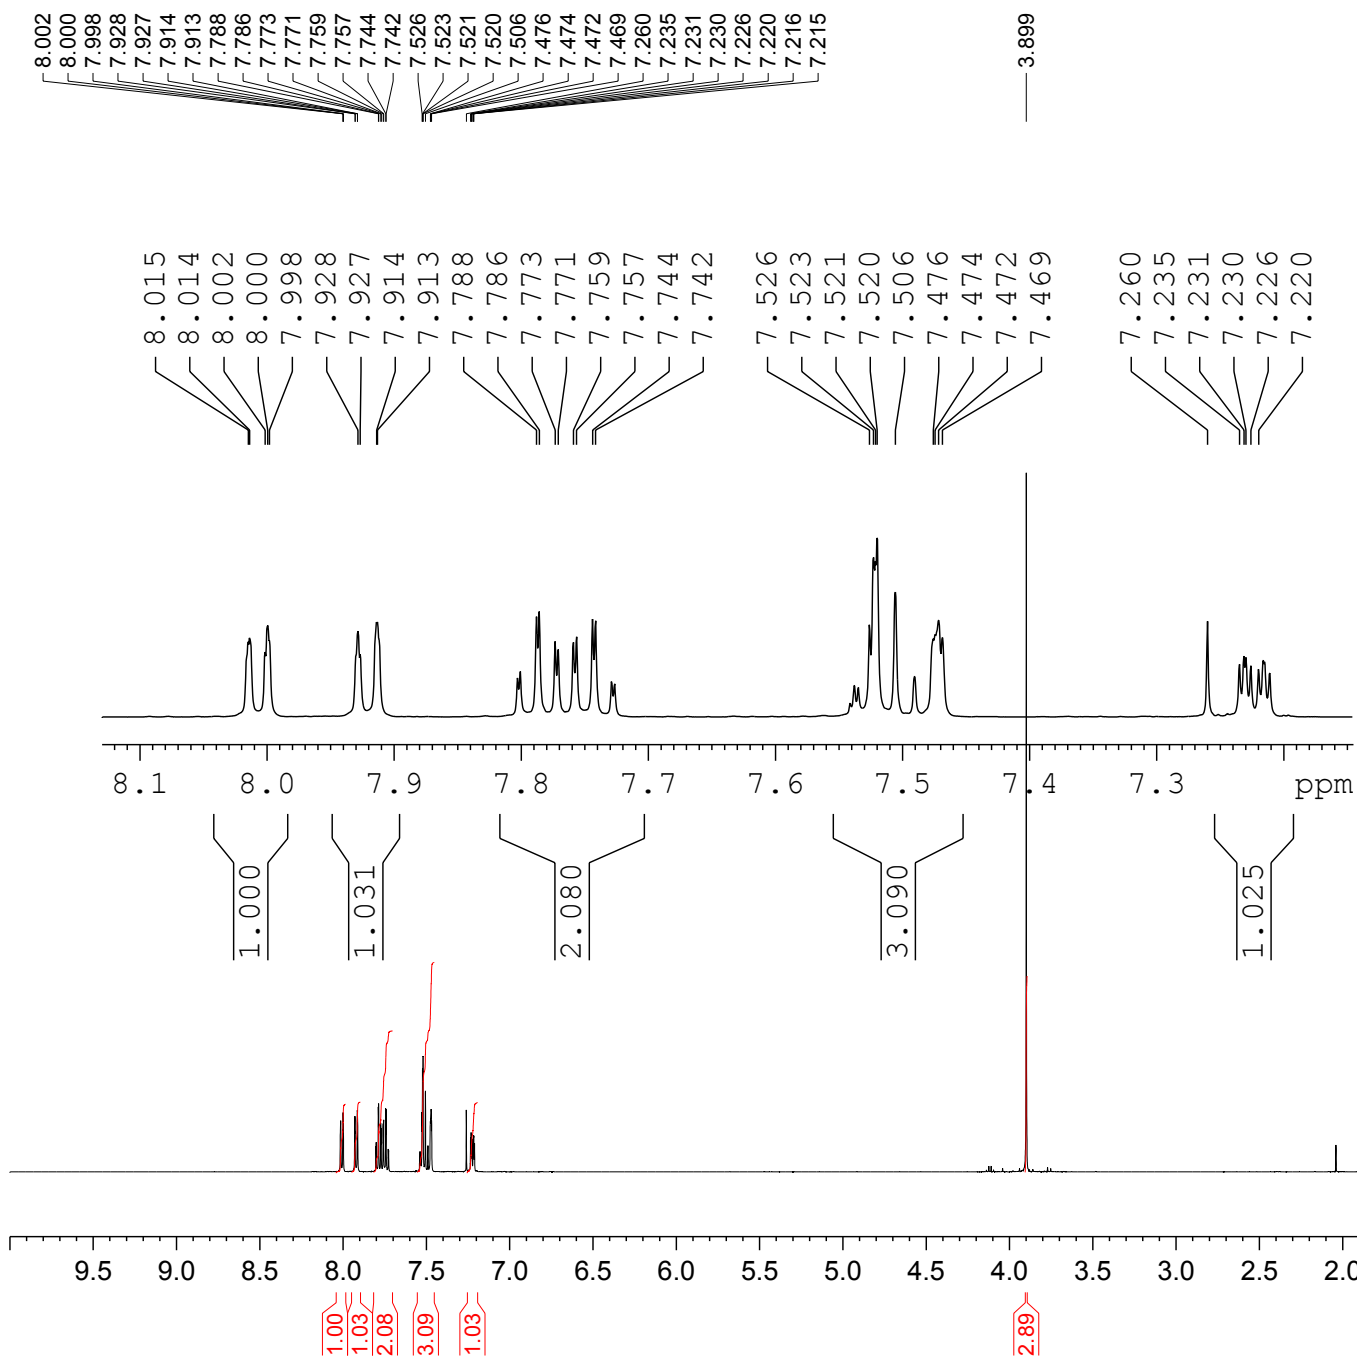

```

Current Data Parameters
NAME                FT240
EXPNO                2
PROCNO              1

F2 - Acquisition Parameters
Date_                20080918
Time_                17.06
INSTRUM              spect
PROBHD                5 mm PABBO BB-
PULPROG              zg30
TD                   65536
SOLVENT              CDCl3
NS                   8
DS                   2
SWH                  7002.801 Hz
FIDRES              0.106854 Hz
AQ                  4.6793203 sec
RG                   287
DW                   71.400 usec
DE                   6.50 usec
TE                   298.3 K
D1                   1.00000000 sec
TD0                  1

===== CHANNEL f1 =====
NUC1                  1H
P1                    10.76 usec
PL1                   0.00 dB
SFO1                  500.3932525 MHz

F2 - Processing parameters
SI                    32768
SF                    500.3900160 MHz
WDW                   EM
SSB                   0
LB                    0.30 Hz
GB                    0
PC                    1.00

```

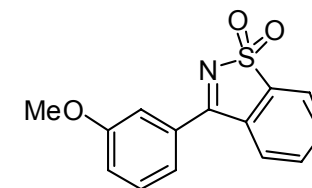

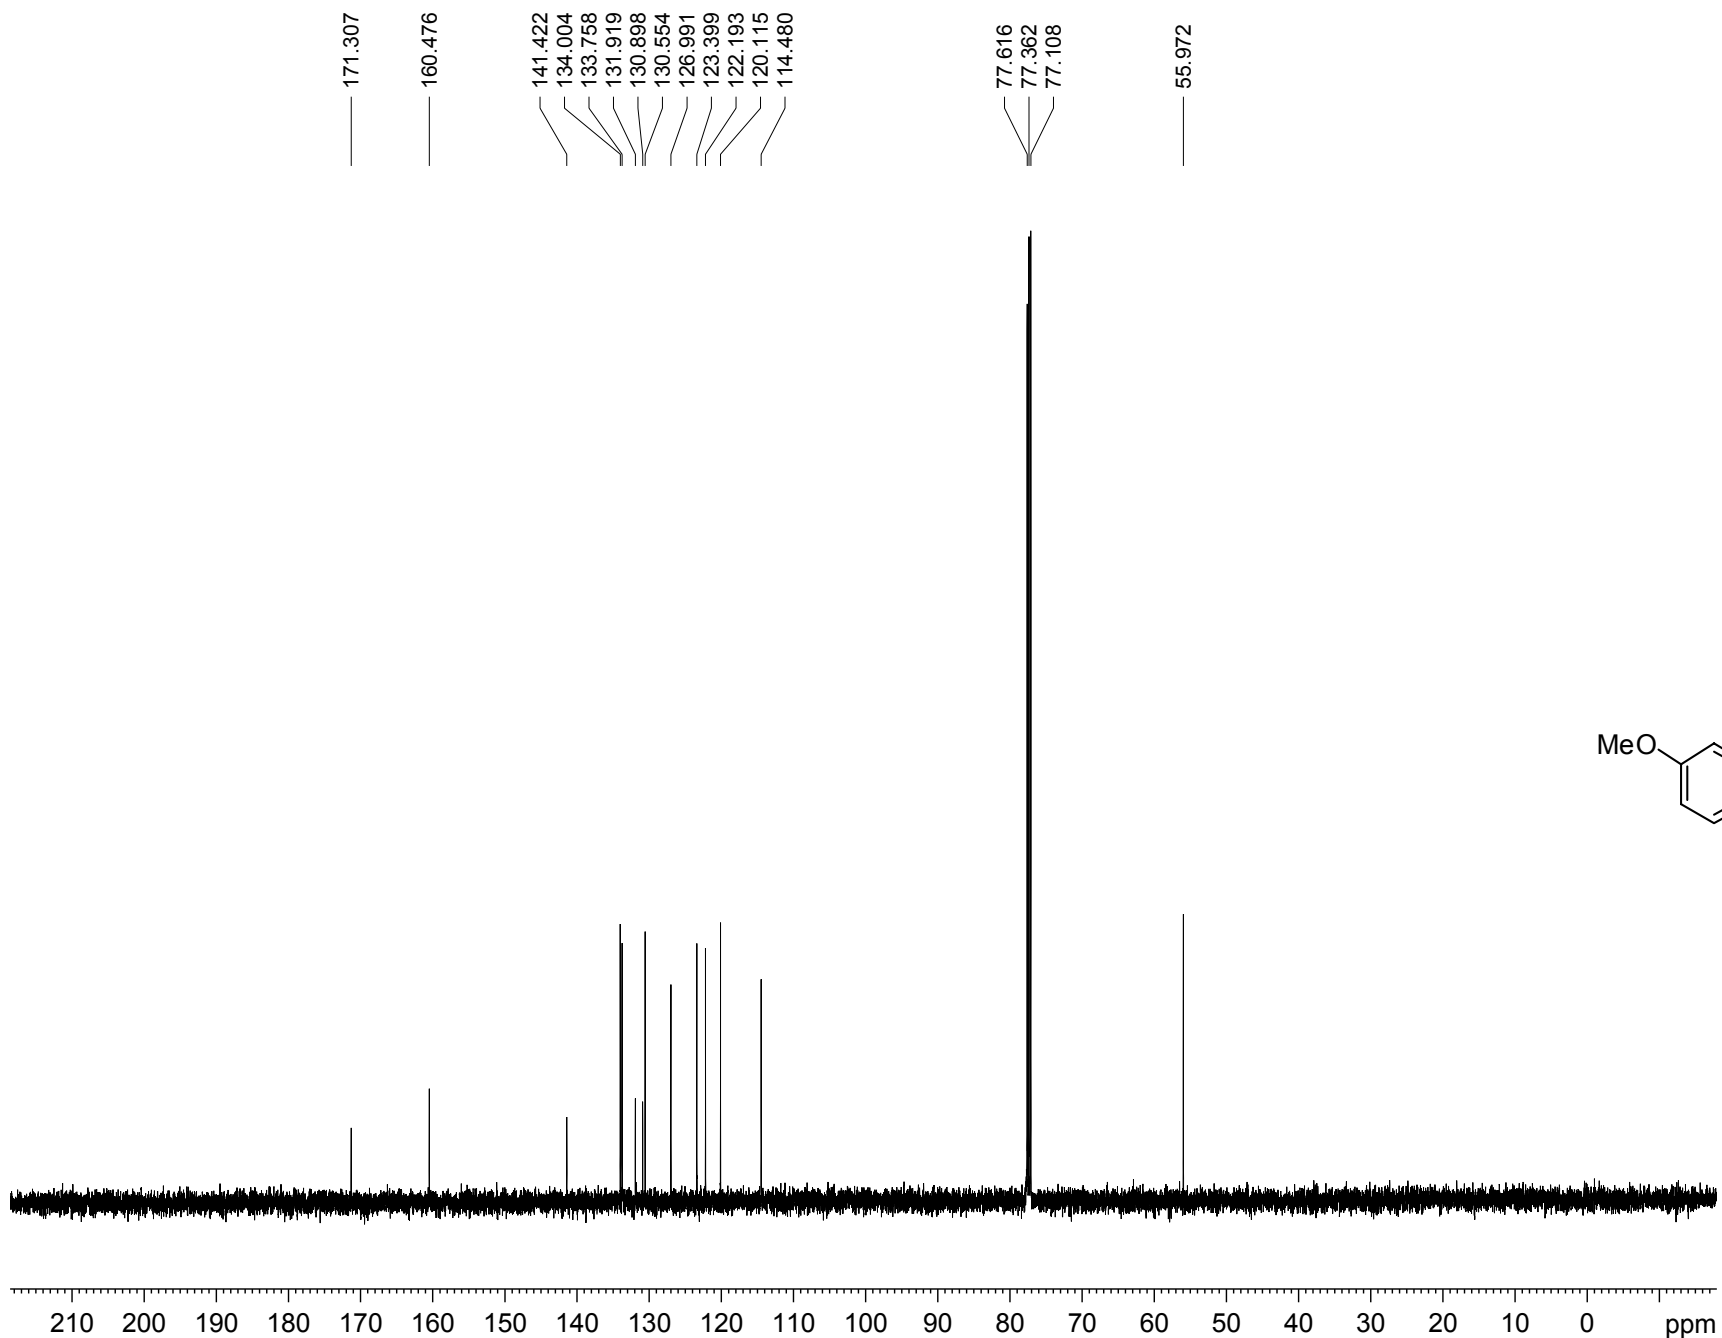

```
Current Data Parameters F7240
NAME
EXPNO 3
PROCNO 1

F2 - Acquisition Parameters
Date_ 20080918
Time_ 17:10
INSTRUM spect
PROBHD 5 mm PABBO BB-
PULPROG zgpg30
TD 65536
SOLVENT CCl3
NS 64
DS 4
SWH 29761.904 Hz
FIDRES 0.454133 Hz
AQ 1.1010548 sec
RG 496
DW 16.800 usec
DE 6.50 usec
TE 298.9 K
D1 2.0000000 sec
d11 0.0300000 sec
DELTA 1.8999999 sec
TD0 1

===== CHANNEL f1 =====
NUC1 13C
P1 7.50 usec
PL1 1.00 dB
SFO1 125.8357479 MHz

===== CHANNEL f2 =====
CPDPRG2 waltz16
NUC2 1H
PCPD2 80.00 usec
PL12 17.43 dB
PL13 18.43 dB
PL2 0.00 dB
SFO2 500.1320016 MHz

F2 - Processing parameters
SI 32768
SF 125.8231264 MHz
WDW EM
SBB 0
LB 1.00 Hz
GB 0
PC 1.40
```

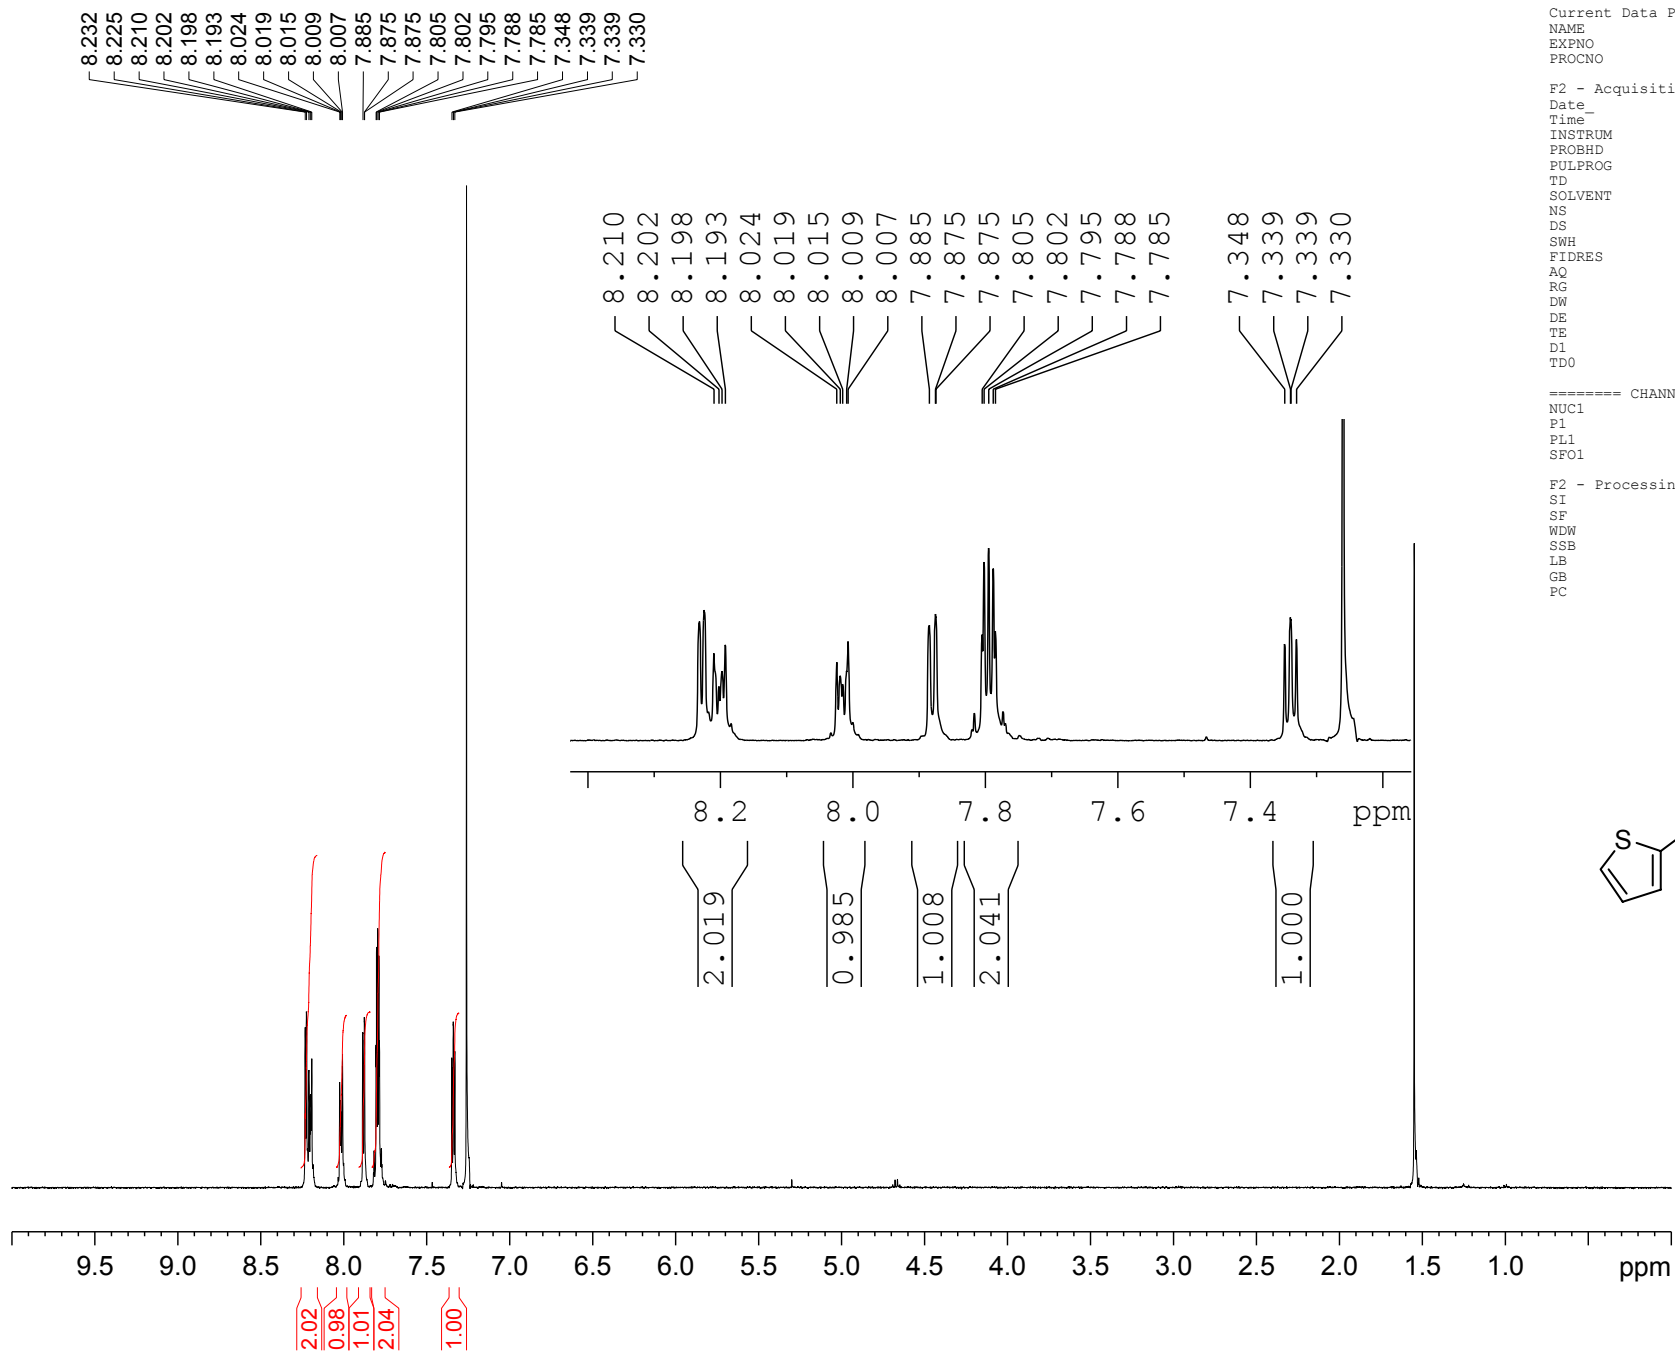

```

Current Data Parameters
NAME          FT221
EXPNO        2
PROCNO       1

F2 - Acquisition Parameters
Date_        20071121
Time_        14.17
INSTRUM      spect
PROBHD       5 mm PABBO BB-
PULPROG      zg30
TD           65536
SOLVENT      CDCl3
NS           16
DS           2
SWH          7002.801 Hz
FIDRES       0.106854 Hz
AQ           4.6793203 sec
RG           1440
DW           71.400 usec
DE           6.50 usec
TE           295.8 K
D1           1.00000000 sec
TD0          1

===== CHANNEL f1 =====
NUC1         1H
P1           10.76 usec
PL1          0.00 dB
SFO1         500.3932525 MHz

F2 - Processing parameters
SI           32768
SF           500.3900165 MHz
WDW          EM
SSB          0
LB           0.30 Hz
GB           0
PC           1.00

```

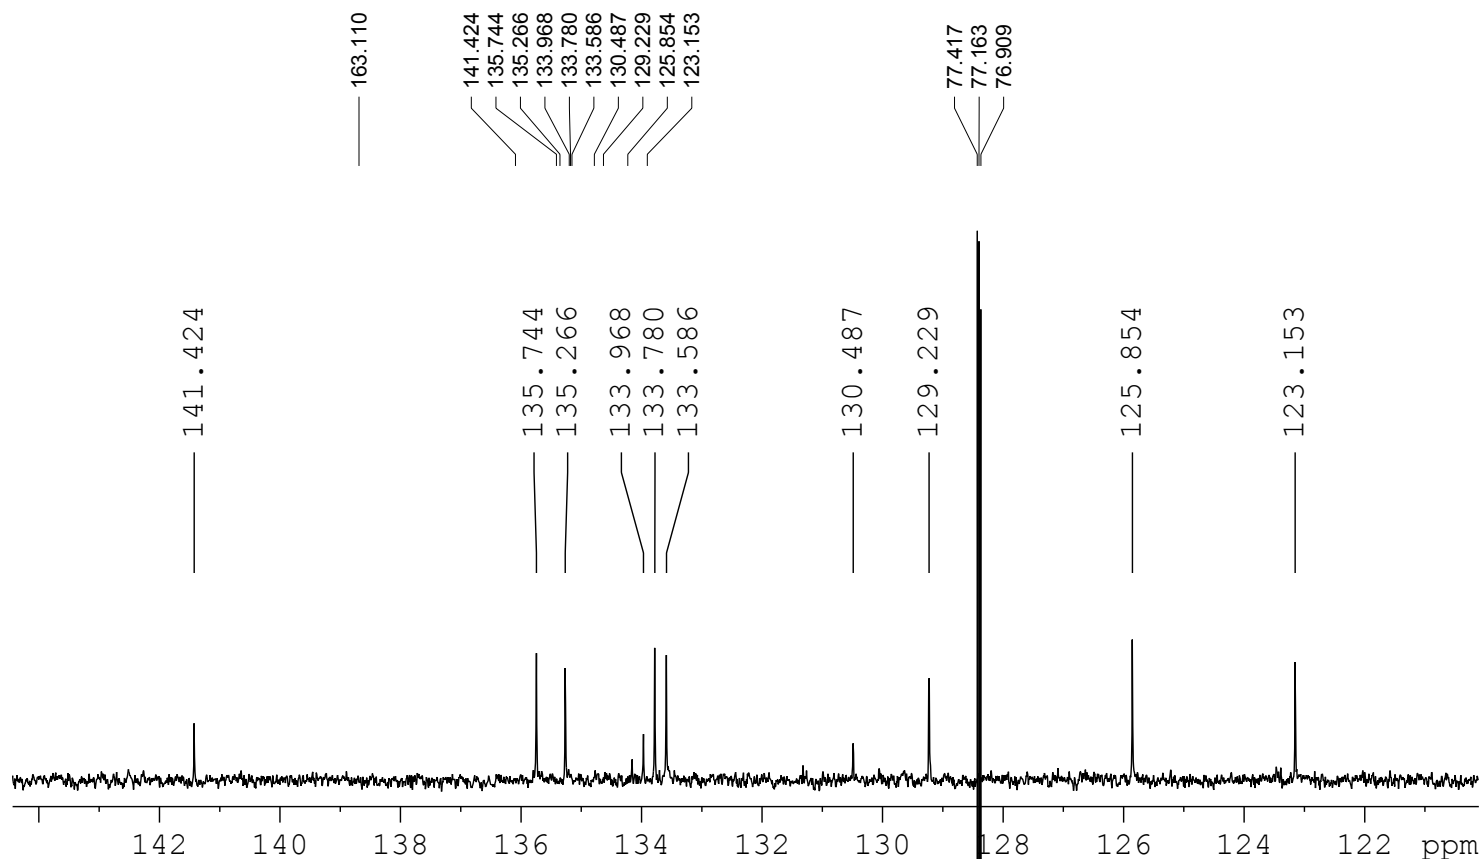

```

Current Data Parameters
NAME          FT221
EXPNO        4
PROCNO       1

F2 - Acquisition Parameters
Date_        20080918
Time         17.21
INSTRUM     spect
PROBHD      5 mm PABBO BB-
PULPROG     zgpg30
TD          65536
SOLVENT     CDCl3
NS          117
DS          4
SWH         29761.904 Hz
FIDRES      0.454131 Hz
AQ          1.1010548 sec
RG          456
DM          16.800 usec
DE          6.50 usec
TE          298.5 K
D1          2.00000000 sec
d11         0.03000000 sec
DELTA       1.89999998 sec
TDO         1

===== CHANNEL f1 =====
NUC1         13C
P1           7.50 usec
PL1          1.00 dB
SFO1         125.8357479 MHz

===== CHANNEL f2 =====
CPDPRG2     waltz16
NUC2         1H
PCPD2       80.00 usec
PL12         17.43 dB
PL13         18.43 dB
PL2          0.00 dB
SFO2         500.3920016 MHz

F2 - Processing parameters
SI           32768
SF           125.8231500 MHz
WDW          EM
SSB          0
LB           1.00 Hz
GB           0
PC           1.40

```

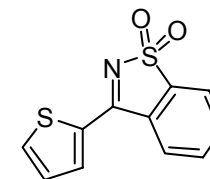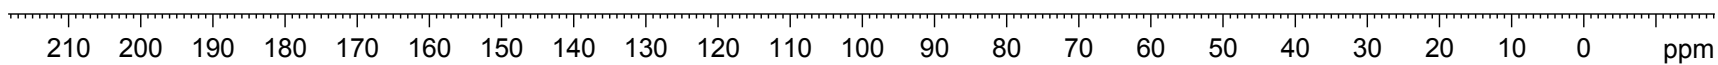



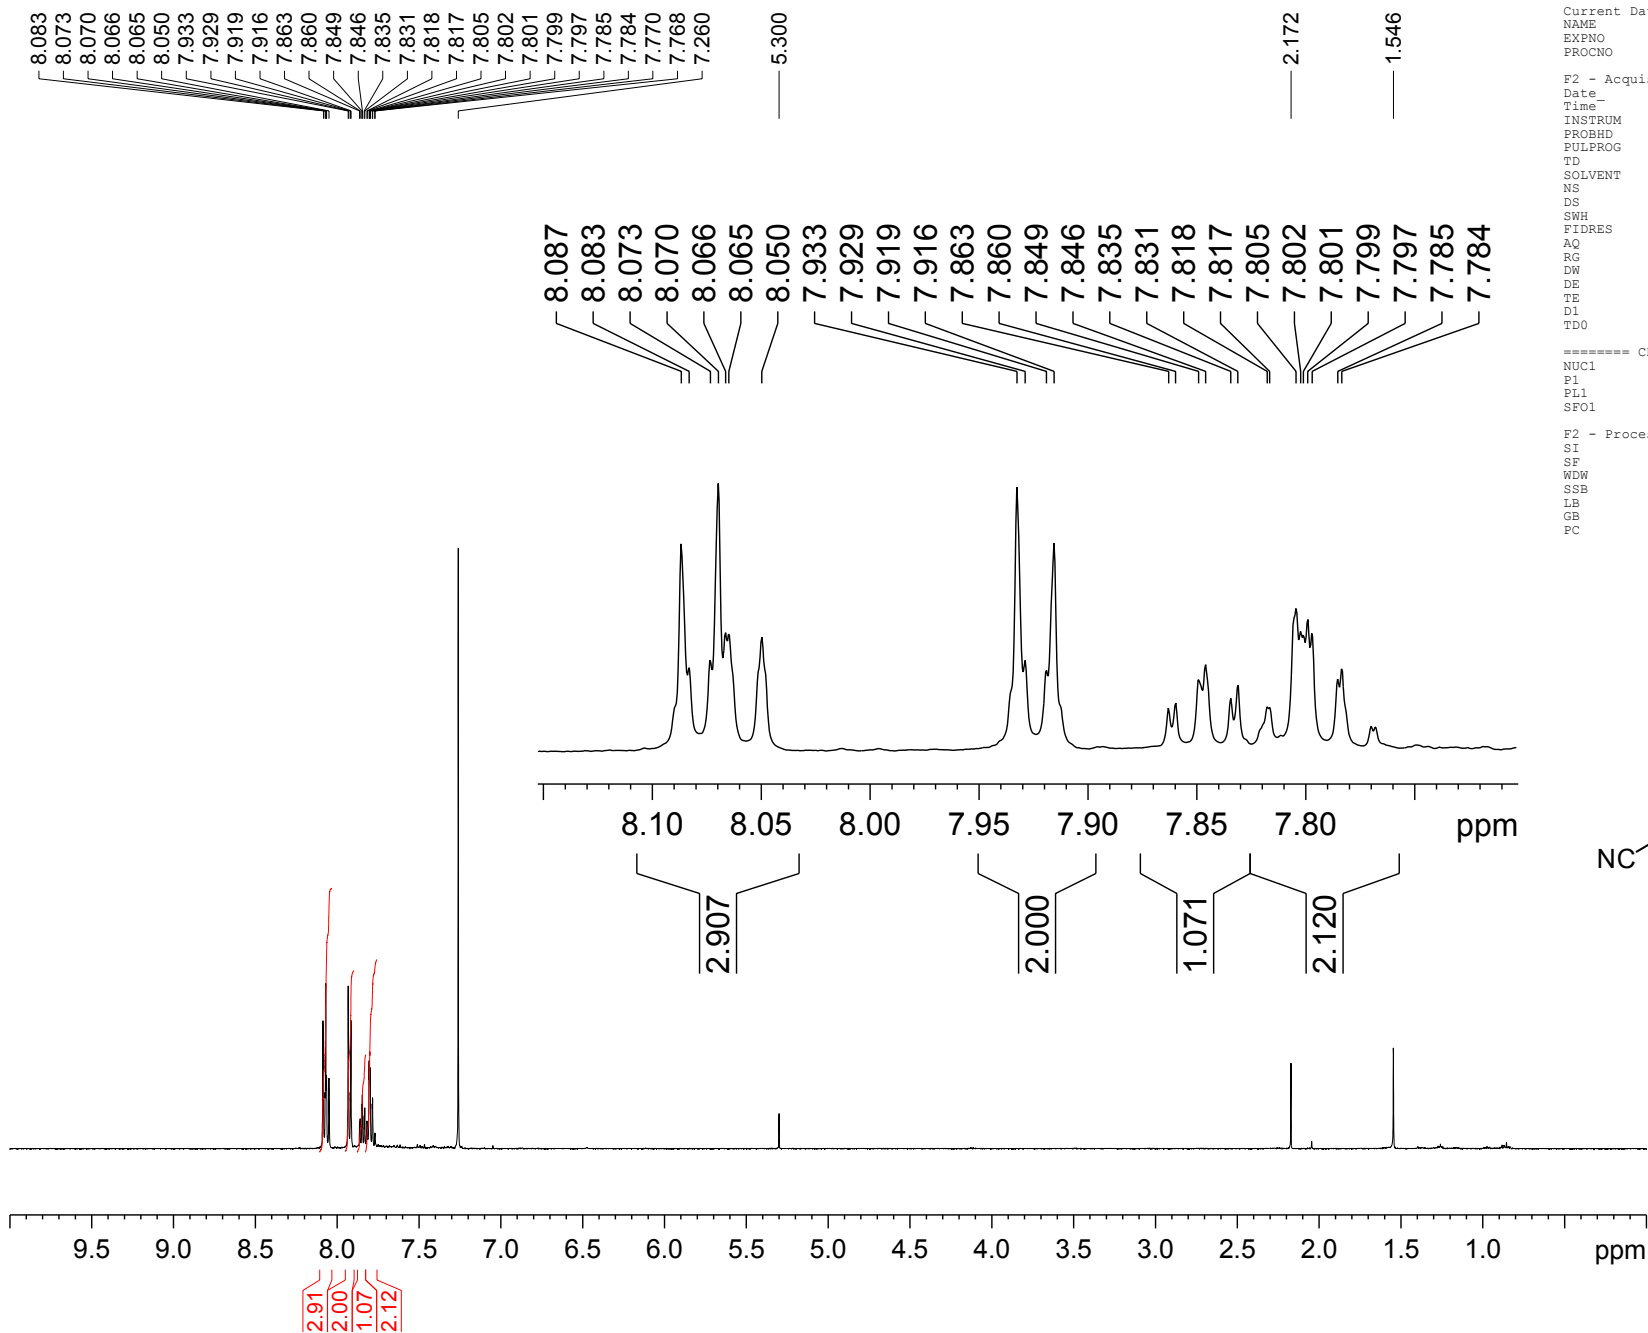

```

Current Data Parameters
NAME          FT226
EXPNO         3
PROCNO        1

F2 - Acquisition Parameters
Date_         20071130
Time_         11.28
INSTRUM       spect
PROBHD        5 mm PABBO BB-
PULPROG       zg30
TD            65536
SOLVENT       CDCl3
NS            16
DS            2
SWH           7002.801 Hz
FIDRES        0.106854 Hz
AQ            4.6793203 sec
RG            1290
DW            71.400 usec
DE            6.50 usec
TE            296.0 K
D1            1.00000000 sec
TDO           1

===== CHANNEL f1 =====
NUC1           1H
P1            10.76 usec
PL1            0.00 dB
SFO1          500.3932525 MHz

F2 - Processing parameters
SI            32768
SF            500.3900162 MHz
WDW           EM
SSB           0
LB            0.30 Hz
GB            0
PC            1.00

```

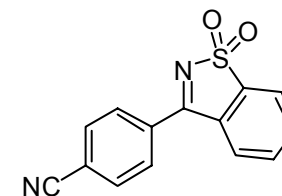

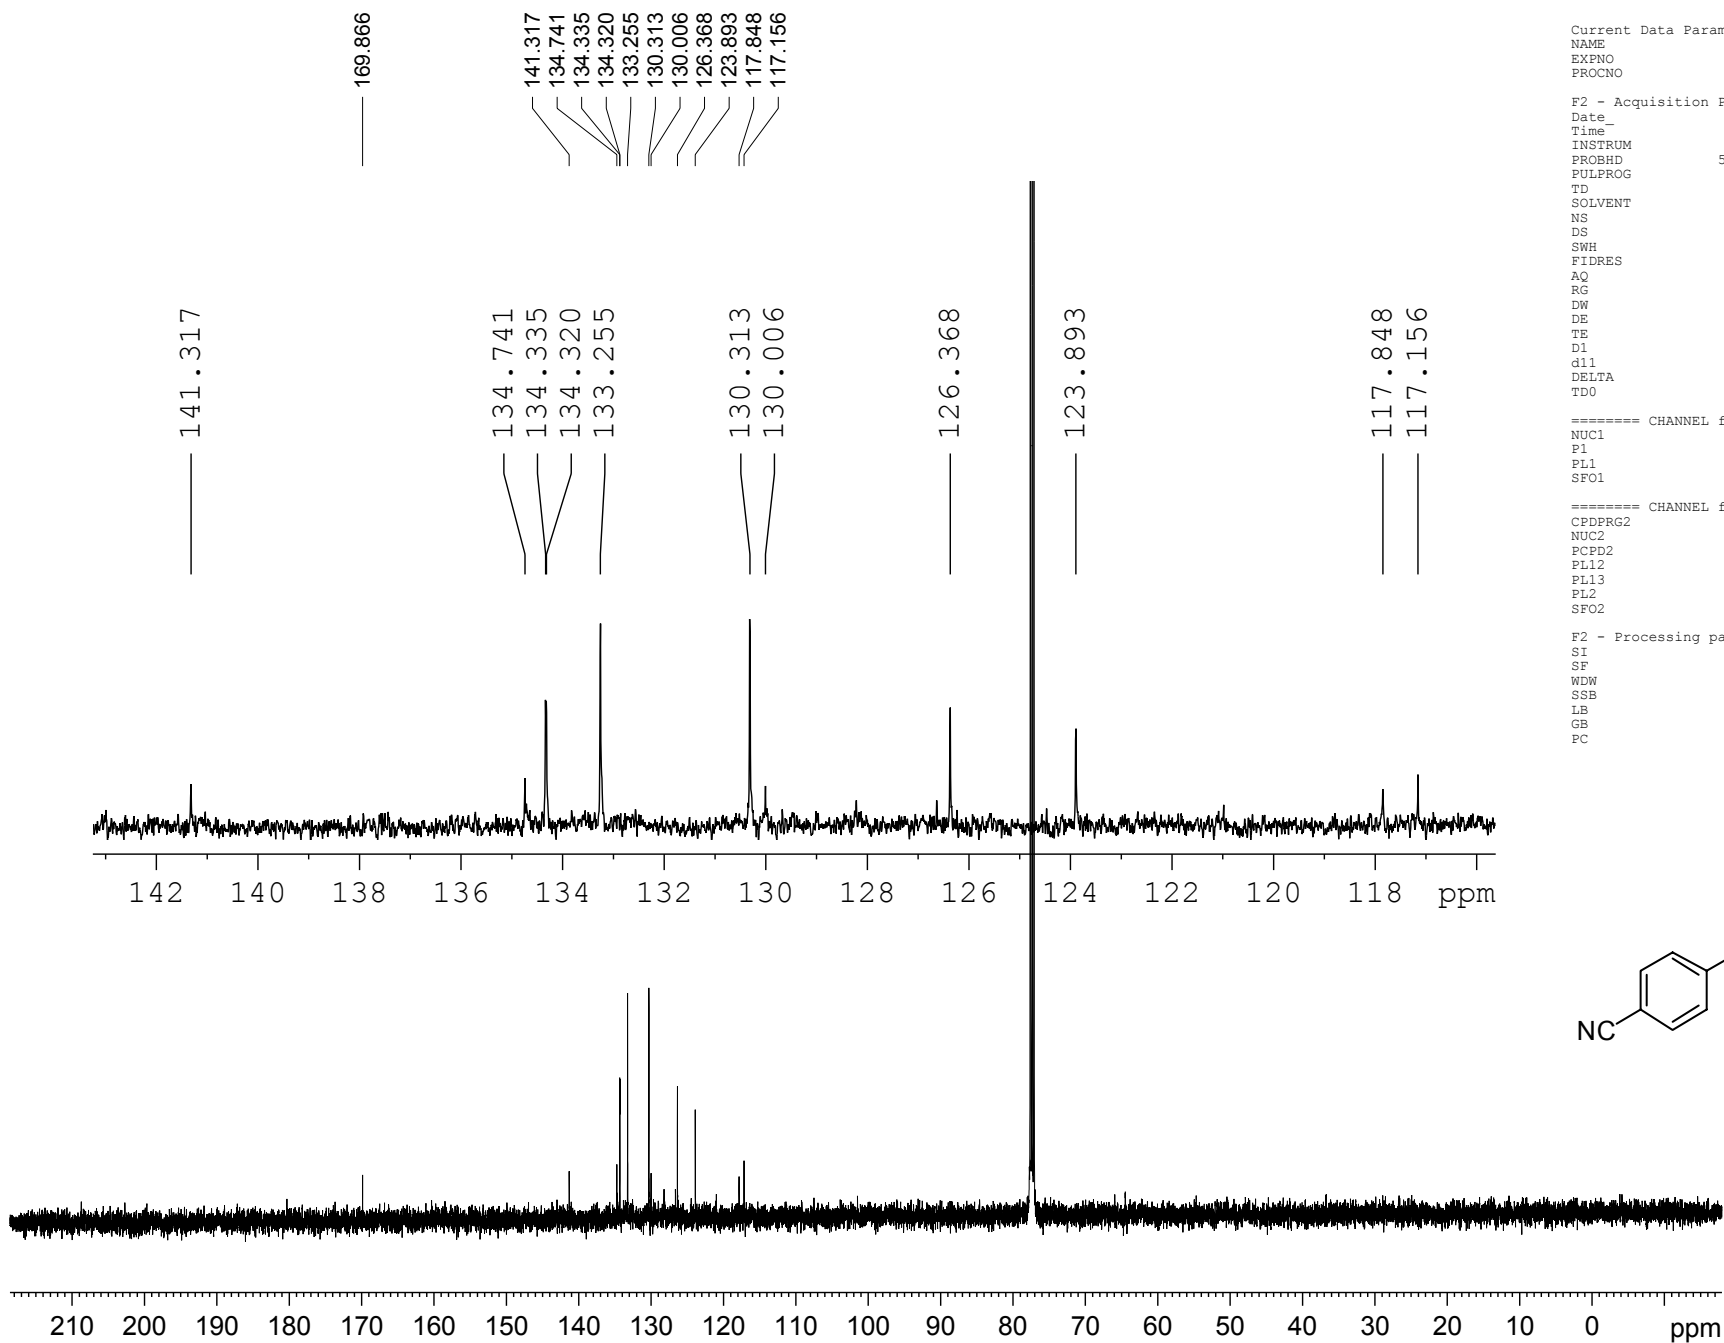

```

Current Data Parameters
NAME          FT226
EXPNO         6
PROCNO        1

F2 - Acquisition Parameters
Date_         20080930
Time          15.14
INSTRUM       spect
PROBHD        5 mm PABBO BB-
PULPROG       zgpg30
TD            65536
SOLVENT       CDCl3
NS            748
DS            4
SWH           29761.904 Hz
FIDRES        0.454131 Hz
AQ            1.1010548 sec
RG            1030
DW            16.800 usec
DE            6.50 usec
TE            298.4 K
D1            2.00000000 sec
d11           0.03000000 sec
DELTA         1.89999998 sec
TD0           1

===== CHANNEL f1 =====
NUC1           13C
P1             7.50 usec
PL1            1.00 dB
SFO1           125.8357479 MHz

===== CHANNEL f2 =====
CPDPRG2        waltz16
NUC2            1H
PCPD2           80.00 usec
PL12            17.43 dB
PL13            18.43 dB
PL2             0.00 dB
SFO2           500.3920016 MHz

F2 - Processing parameters
SI             32768
SF            125.8231246 MHz
WDW            EM
SSB            0
LB             1.00 Hz
GB             0
PC             1.40

```

8.967  
8.789  
8.780  
8.031  
8.016  
7.836  
7.821  
7.806  
7.731  
7.716  
7.701  
7.468  
7.403  
7.388  
7.260

```
NAME FT229
EXPNO 1
PROCNO 1

F2 - Acquisition Parameters
Date_ 20080919
Time_ 11.31
INSTRUM spect
PROBHD 5 mm F4BBO BB-
PULPROG zgpg30
TD 65536
SOLVENT cdcl3
NS 8
DS 2
SWH 7002.801 Hz
FIDRES 0.106854 Hz
AQ 4.6793203 sec
RG 362
DW 71.400 usec
DE 6.50 usec
TE 297.6 K
D1 1.0000000 sec
TDO 1

----- CHANNEL f1 -----
NUC1 1H
P1 10.76 usec
PL1 0.00 dB
SFO1 500.3932525 MHz

F2 - Processing parameters
SI 32768
SF 500.3900171 MHz
WDW EM
SSB 0
LB 0.30 Hz
GB 0
PC 1.00
```

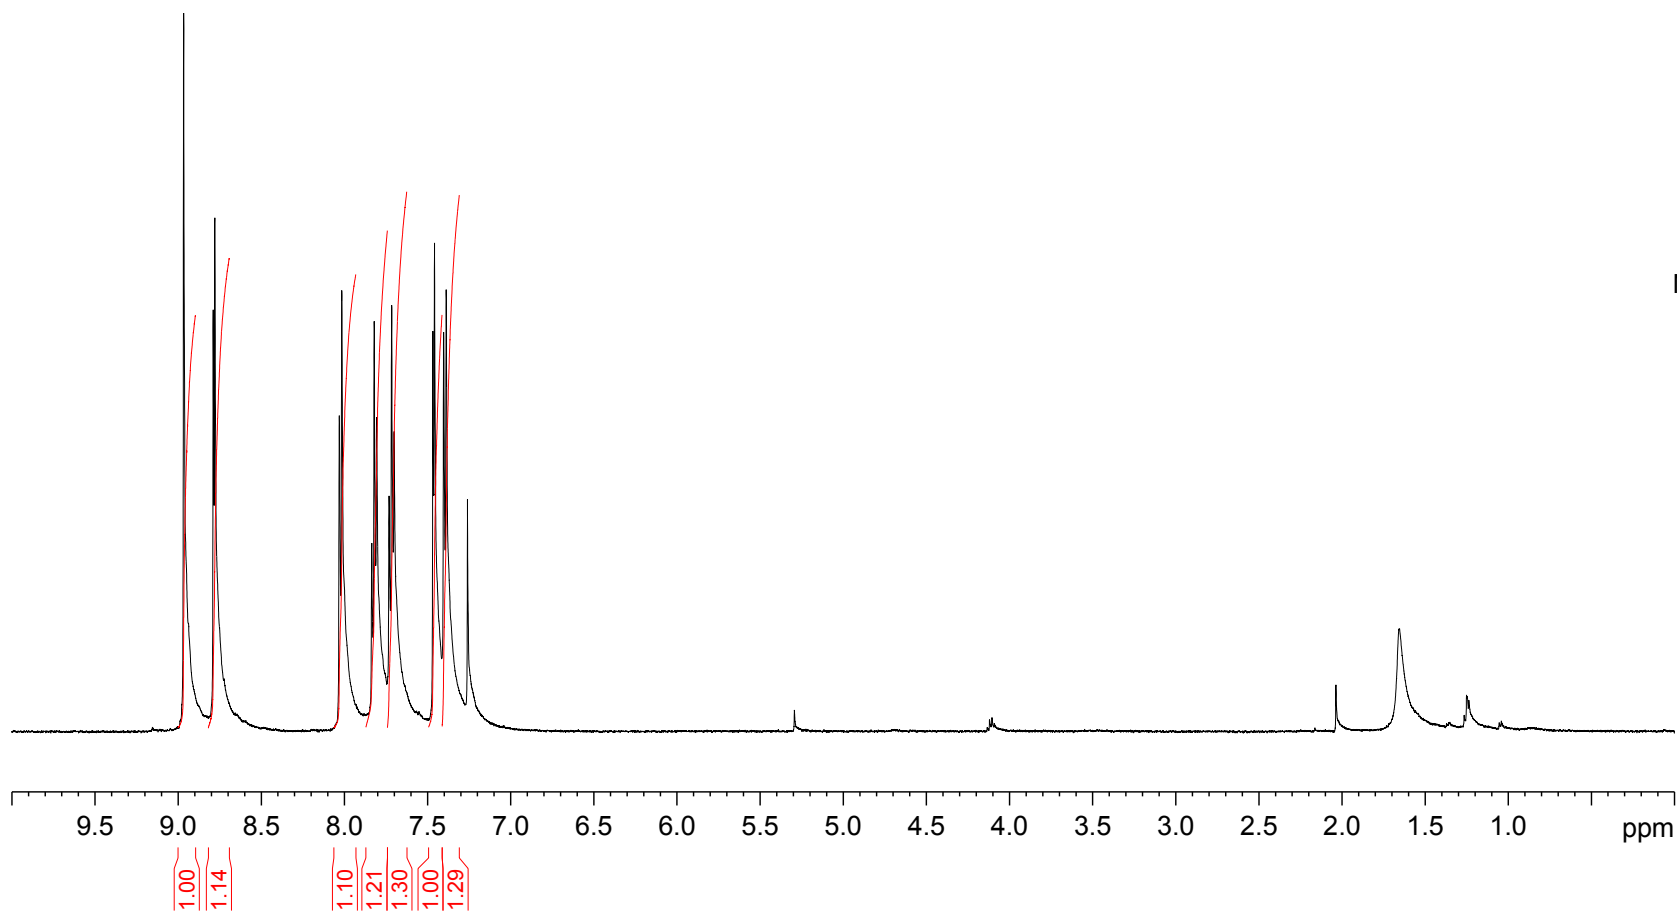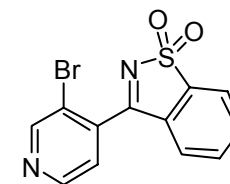

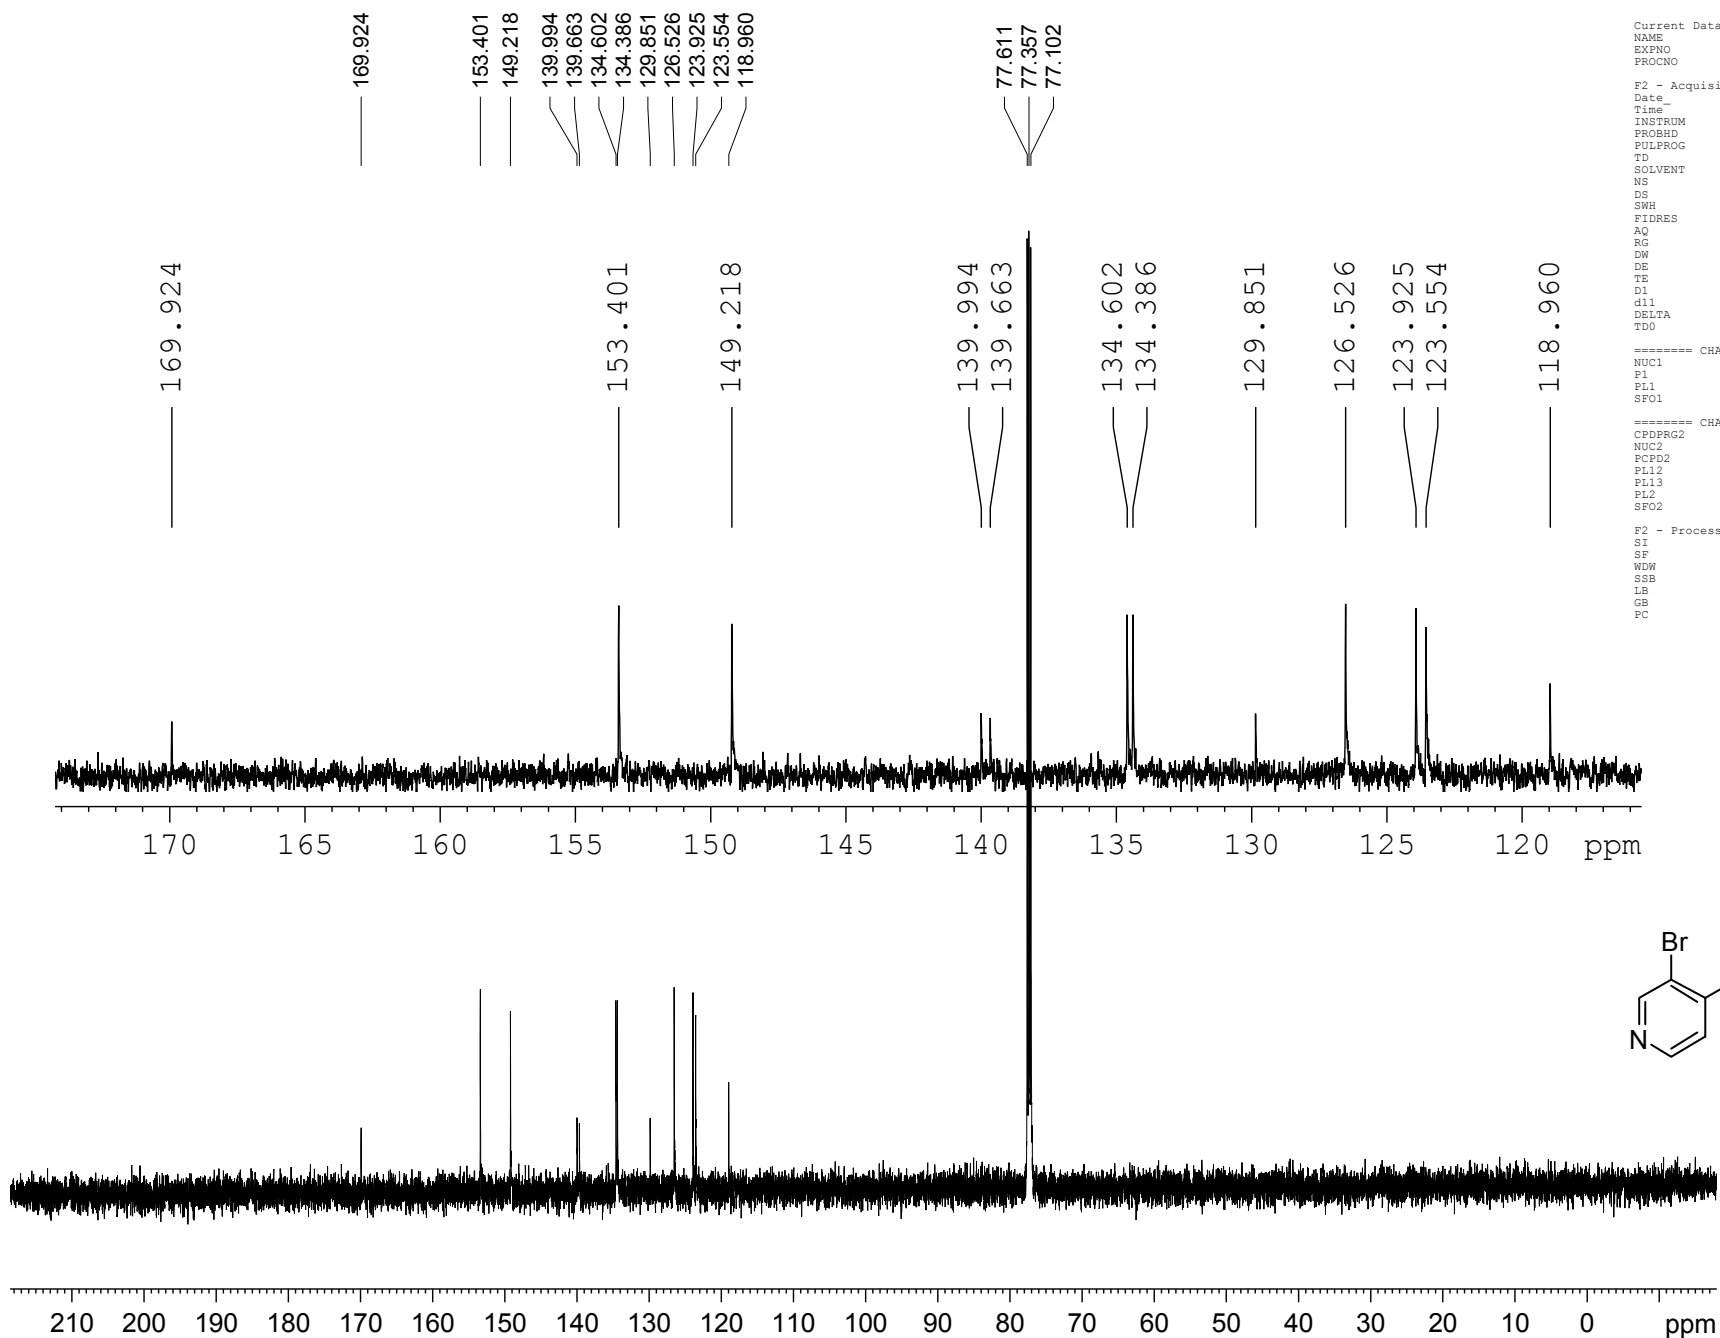

Current Data Parameters  
NAME FT229  
EXPNO 2  
PROCNO 1

F2 - Acquisition Parameters  
Date\_ 20080919  
Time 11.39  
INSTRUM spect  
PROBHD 5 mm PABBO BB-  
PULPROG zgpg30  
TD 65536  
SOLVENT CDCl3  
NS 127  
DS 4  
SWH 29761.904 Hz  
FIDRES 0.454131 Hz  
AQ 1.1010548 sec  
RG 456  
DW 16.800 usec  
DE 6.50 usec  
TE 298.5 K  
d1 2.00000000 sec  
d11 0.03000000 sec  
DELTA 1.89999998 sec  
TDO 1

==== CHANNEL f1 =====  
NUC1 13C  
P1 7.50 usec  
PL1 1.00 dB  
SFO1 125.8357479 MHz

==== CHANNEL f2 =====  
CPDPRG2 waltz16  
NUC2 1H  
PCPD2 80.00 usec  
PL12 17.43 dB  
PL13 18.43 dB  
PL2 0.00 dB  
SFO2 500.3920016 MHz

F2 - Processing parameters  
SI 32768  
SF 125.8231273 MHz  
WDW EM  
SSB 0  
LB 1.00 Hz  
GB 0  
PC 1.40

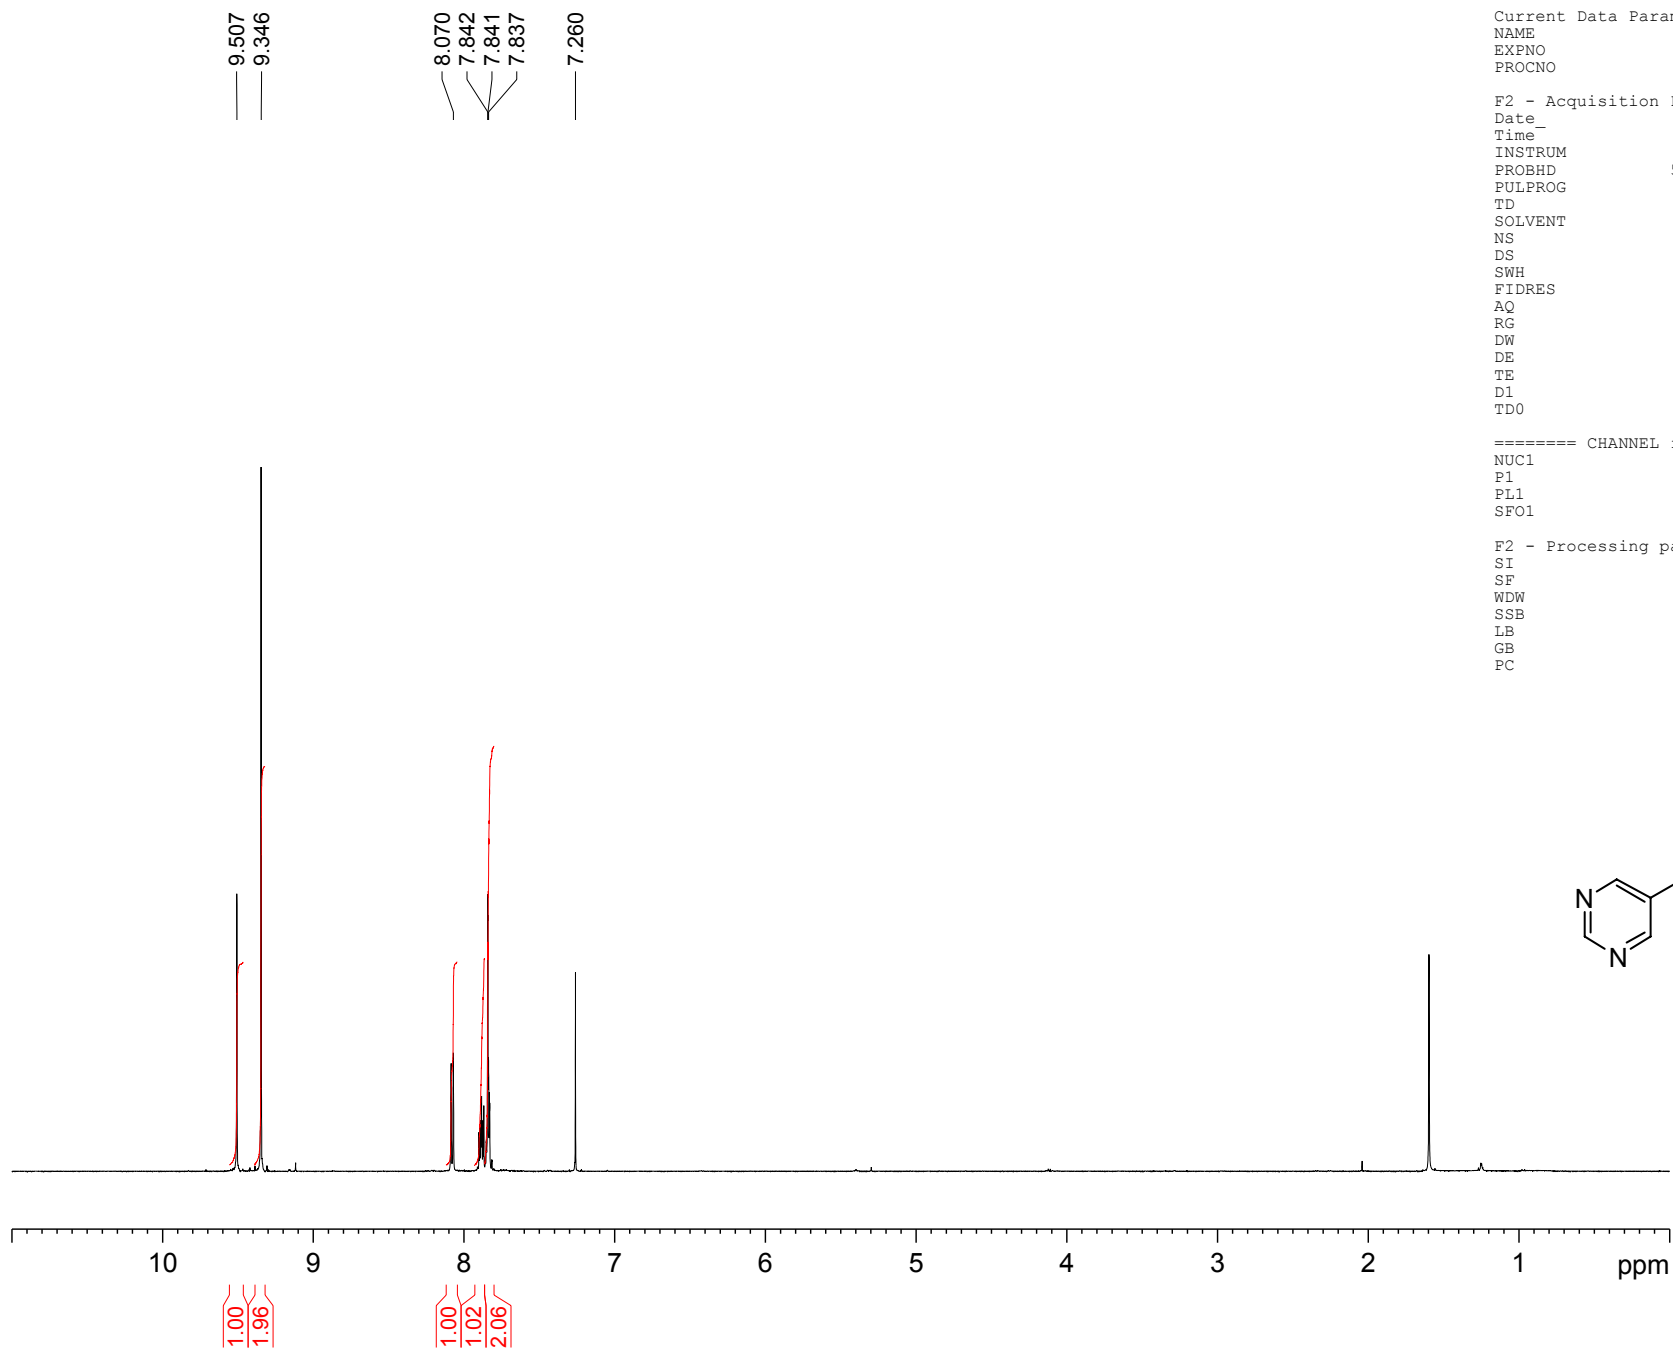

## Current Data Parameters

NAME FT531  
EXPNO 1  
PROCNO 1

## F2 - Acquisition Parameters

Date\_ 20080715  
Time\_ 15.47  
INSTRUM spect  
PROBHD 5 mm PABBO BB-  
PULPROG zg30  
TD 65536  
SOLVENT CDCl3  
NS 16  
DS 2  
SWH 7002.801 Hz  
FIDRES 0.106854 Hz  
AQ 4.6793203 sec  
RG 512  
DW 71.400 usec  
DE 6.50 usec  
TE 296.6 K  
D1 1.00000000 sec  
TDO 1

## ===== CHANNEL f1 =====

NUC1 1H  
P1 10.76 usec  
PL1 0.00 dB  
SFO1 500.3932525 MHz

## F2 - Processing parameters

SI 32768  
SF 500.3900165 MHz  
WDW EM  
SSB 0  
LB 0.30 Hz  
GB 0  
PC 1.00

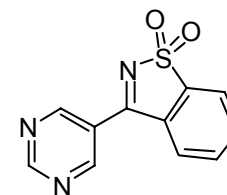

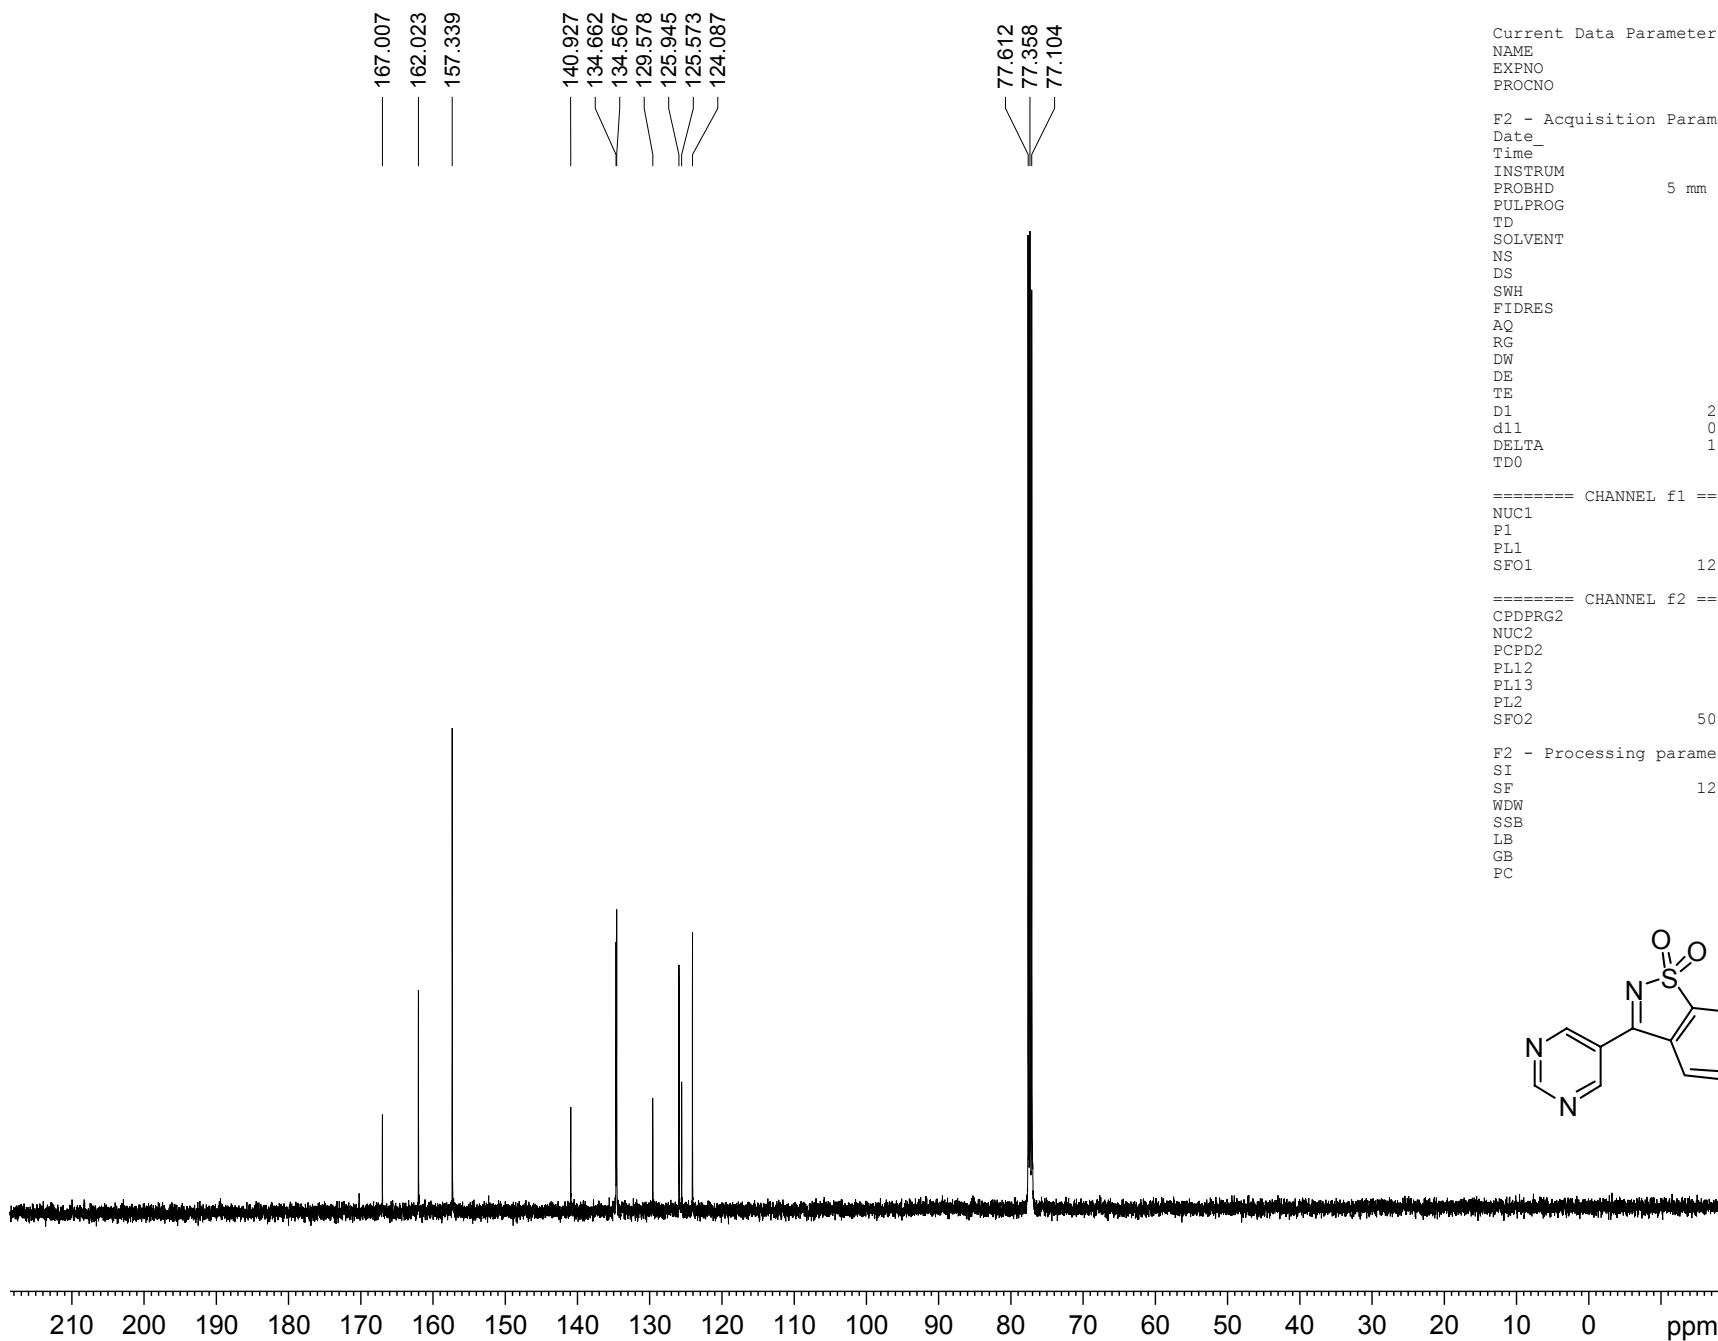

## Current Data Parameters

NAME FT531  
EXPRO 3  
PROCNO 1

## F2 - Acquisition Parameters

Date 20080919  
Time 12.00  
INSTRUM spect  
PROBHD 5 mm PABBO BB-  
PULPROG zgpg30  
TD 65536  
SOLVENT CDCl3  
NS 297  
DS 4  
SWH 29761.904 Hz  
FIDRES 0.454131 Hz  
AQ 1.1010548 sec  
RG 456  
DW 16.800 usec  
DE 6.50 usec  
TE 298.7 K  
D1 2.00000000 sec  
d11 0.03000000 sec  
DELTA 1.89999998 sec  
TD0 1

## ===== CHANNEL f1 =====

NUC1 13C  
P1 7.50 usec  
PL1 1.00 dB  
SFO1 125.8357479 MHz

## ===== CHANNEL f2 =====

CPDPRG2 waltz16  
NUC2 1H  
PCPD2 80.00 usec  
PL12 17.43 dB  
PL13 18.43 dB  
PL2 0.00 dB  
SFO2 500.3920016 MHz

## F2 - Processing parameters

SI 32768  
SF 125.8231273 MHz  
WDW EM  
SSB 0  
LB 1.00 Hz  
GB 0  
PC 1.40

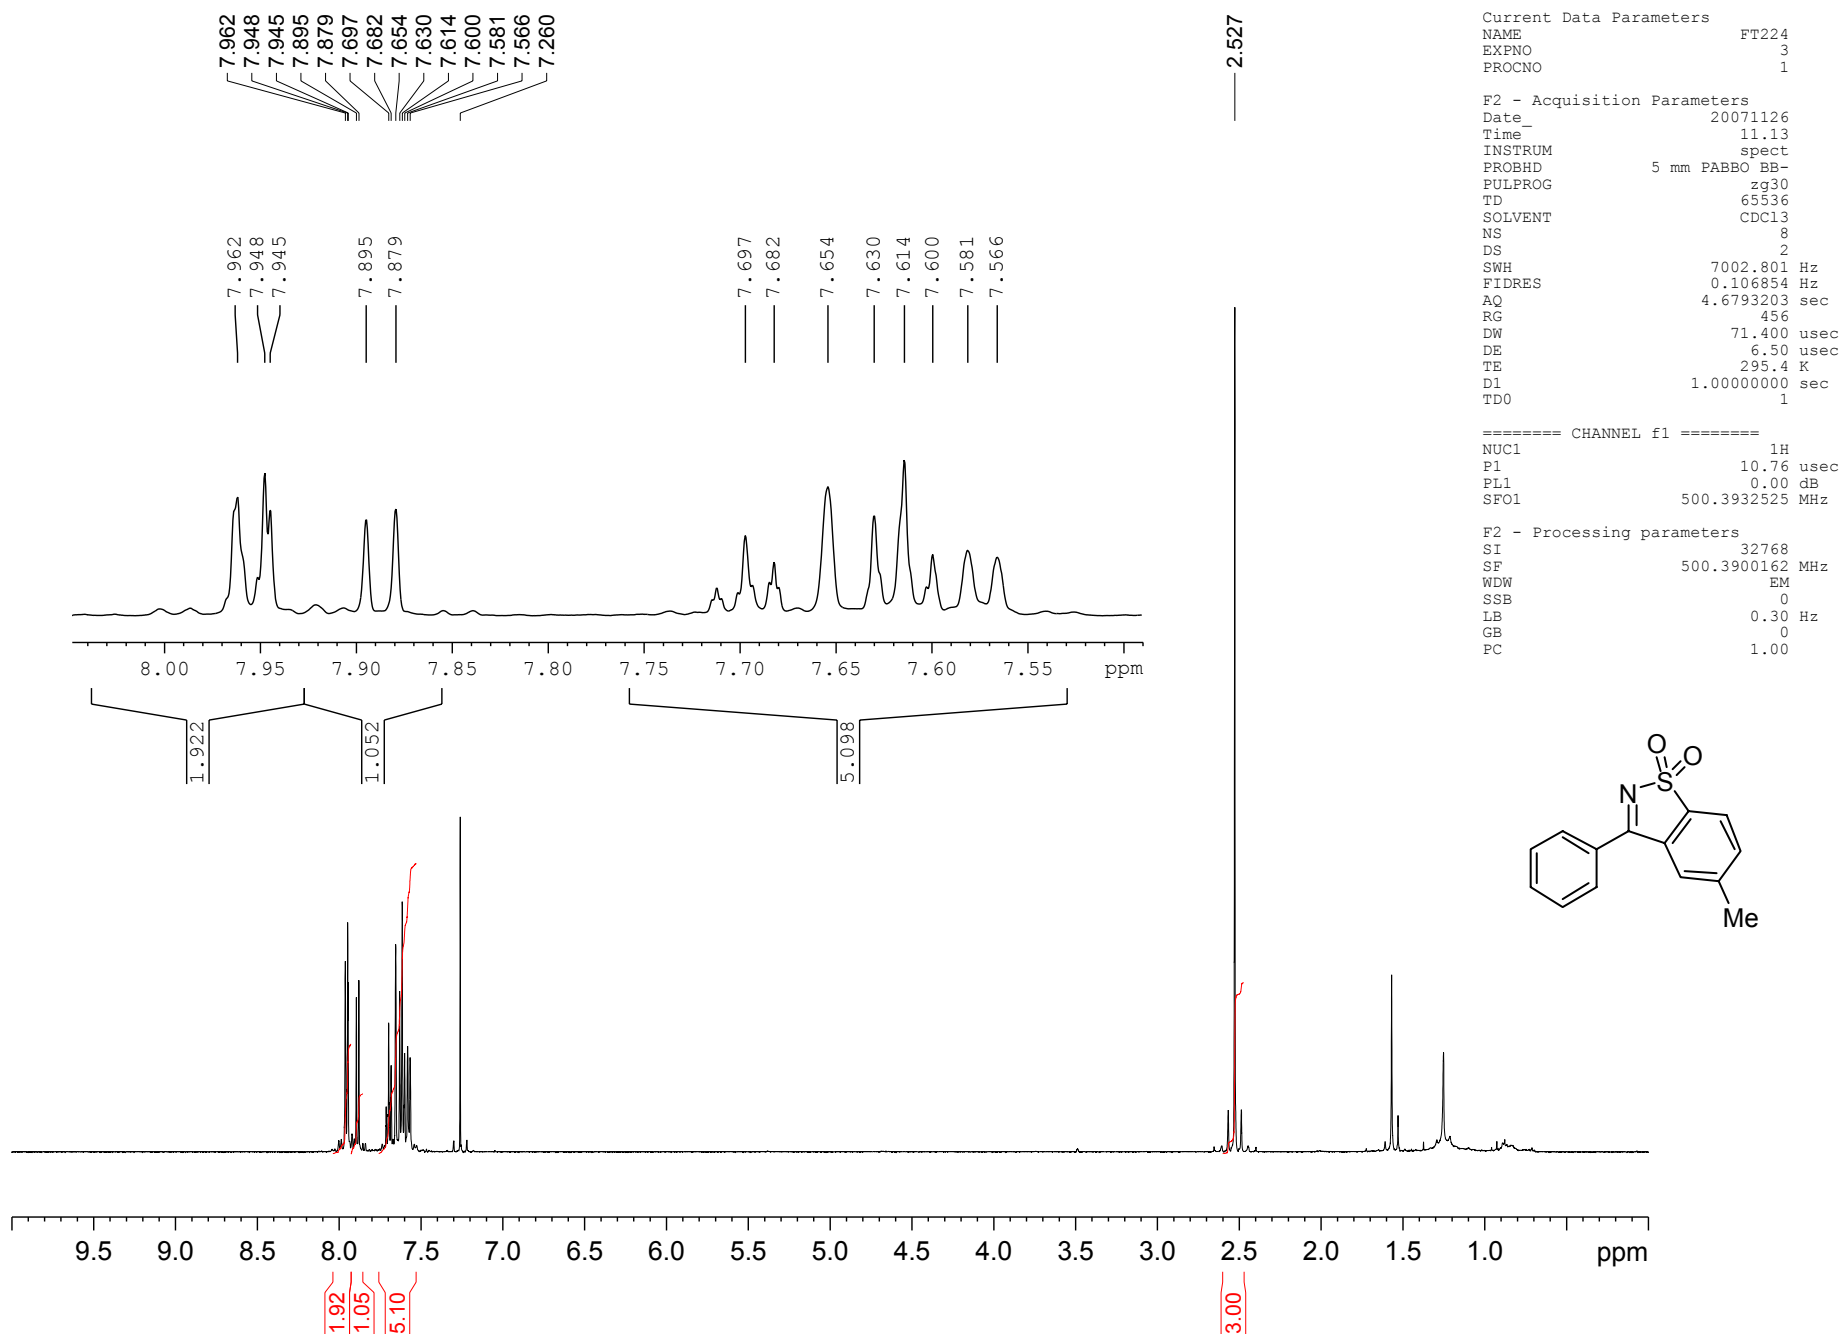

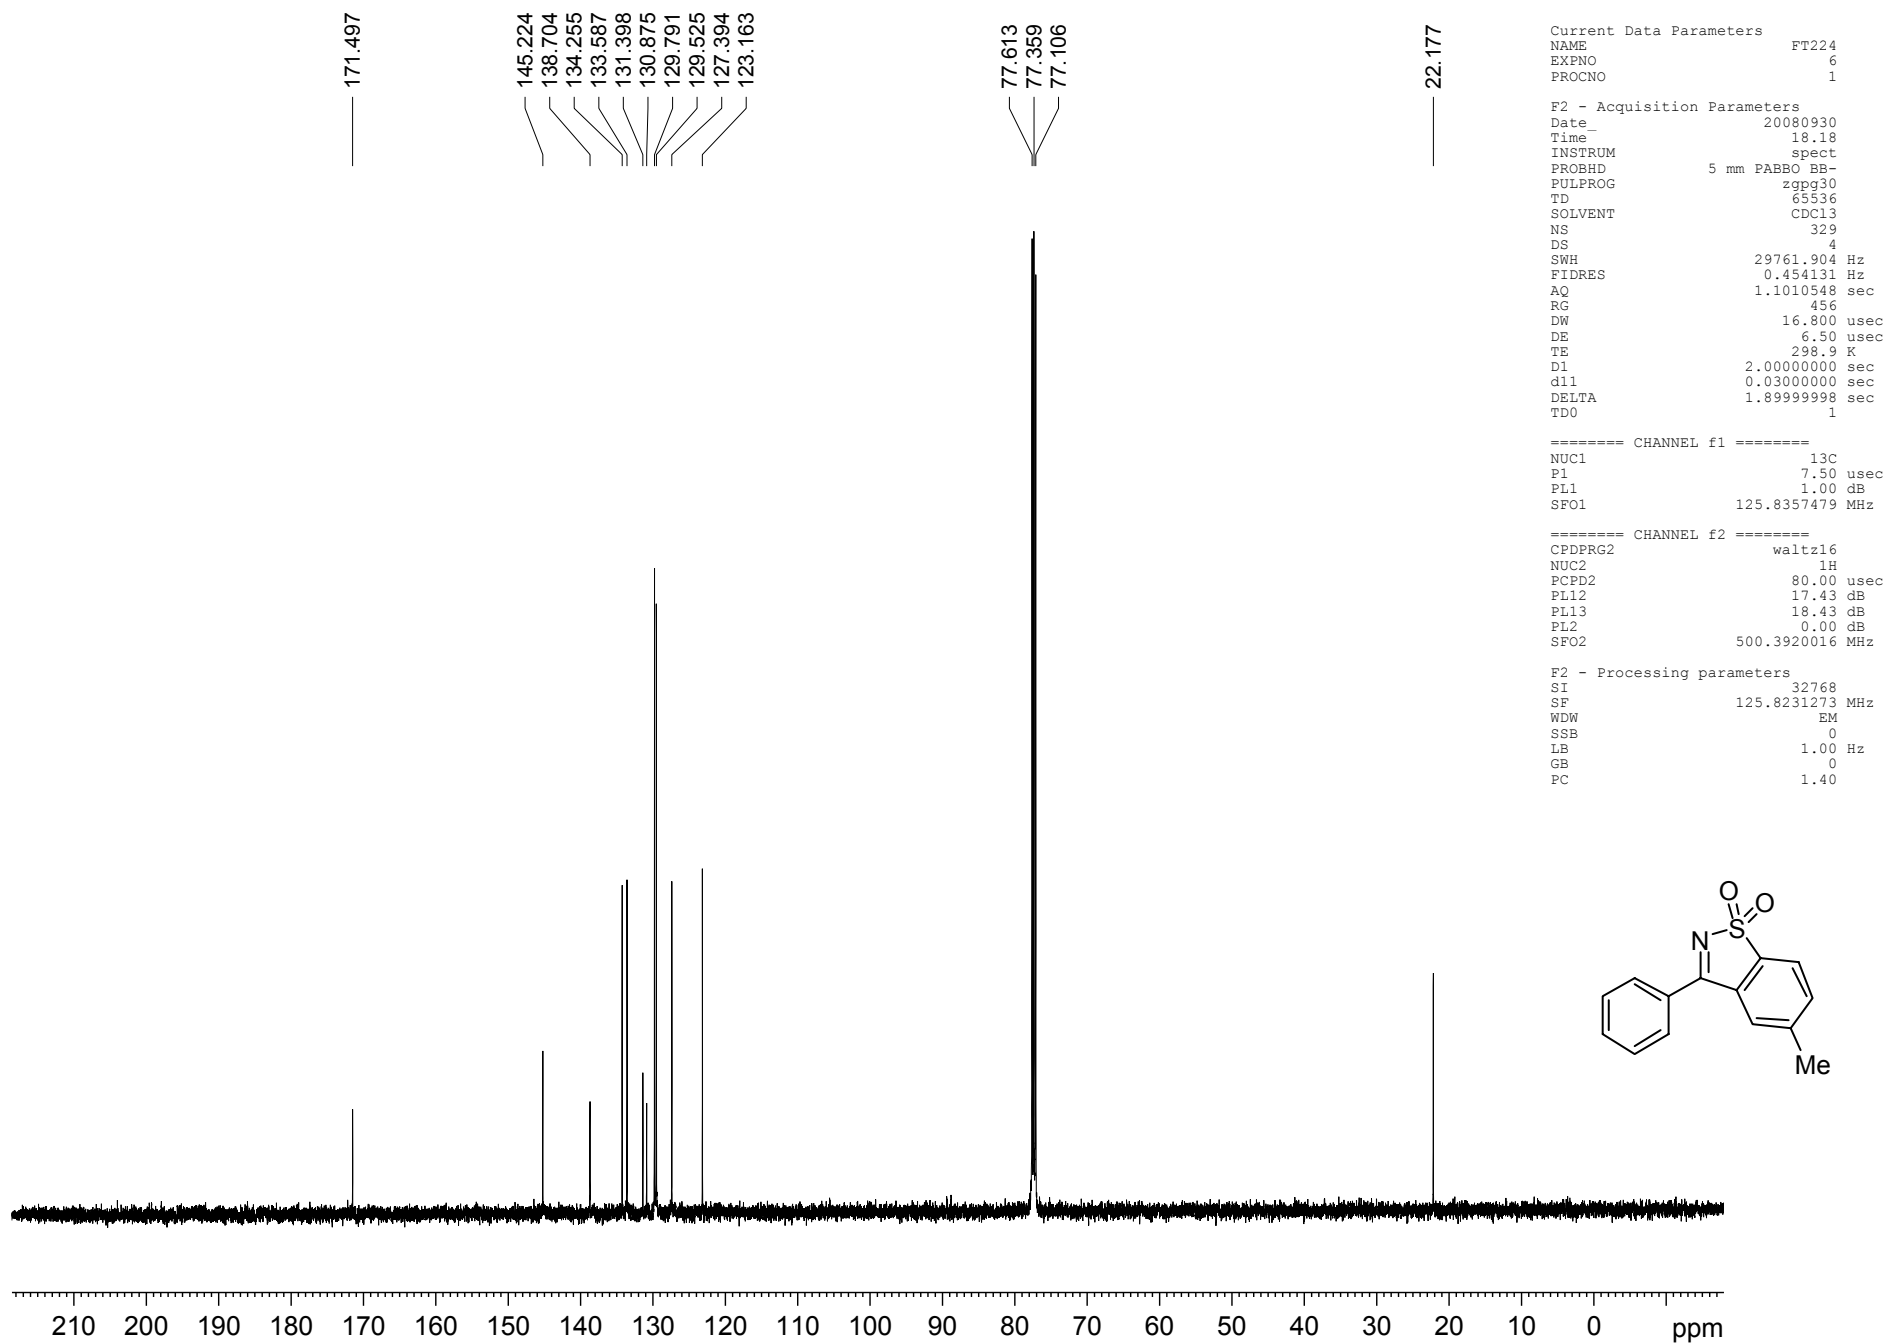



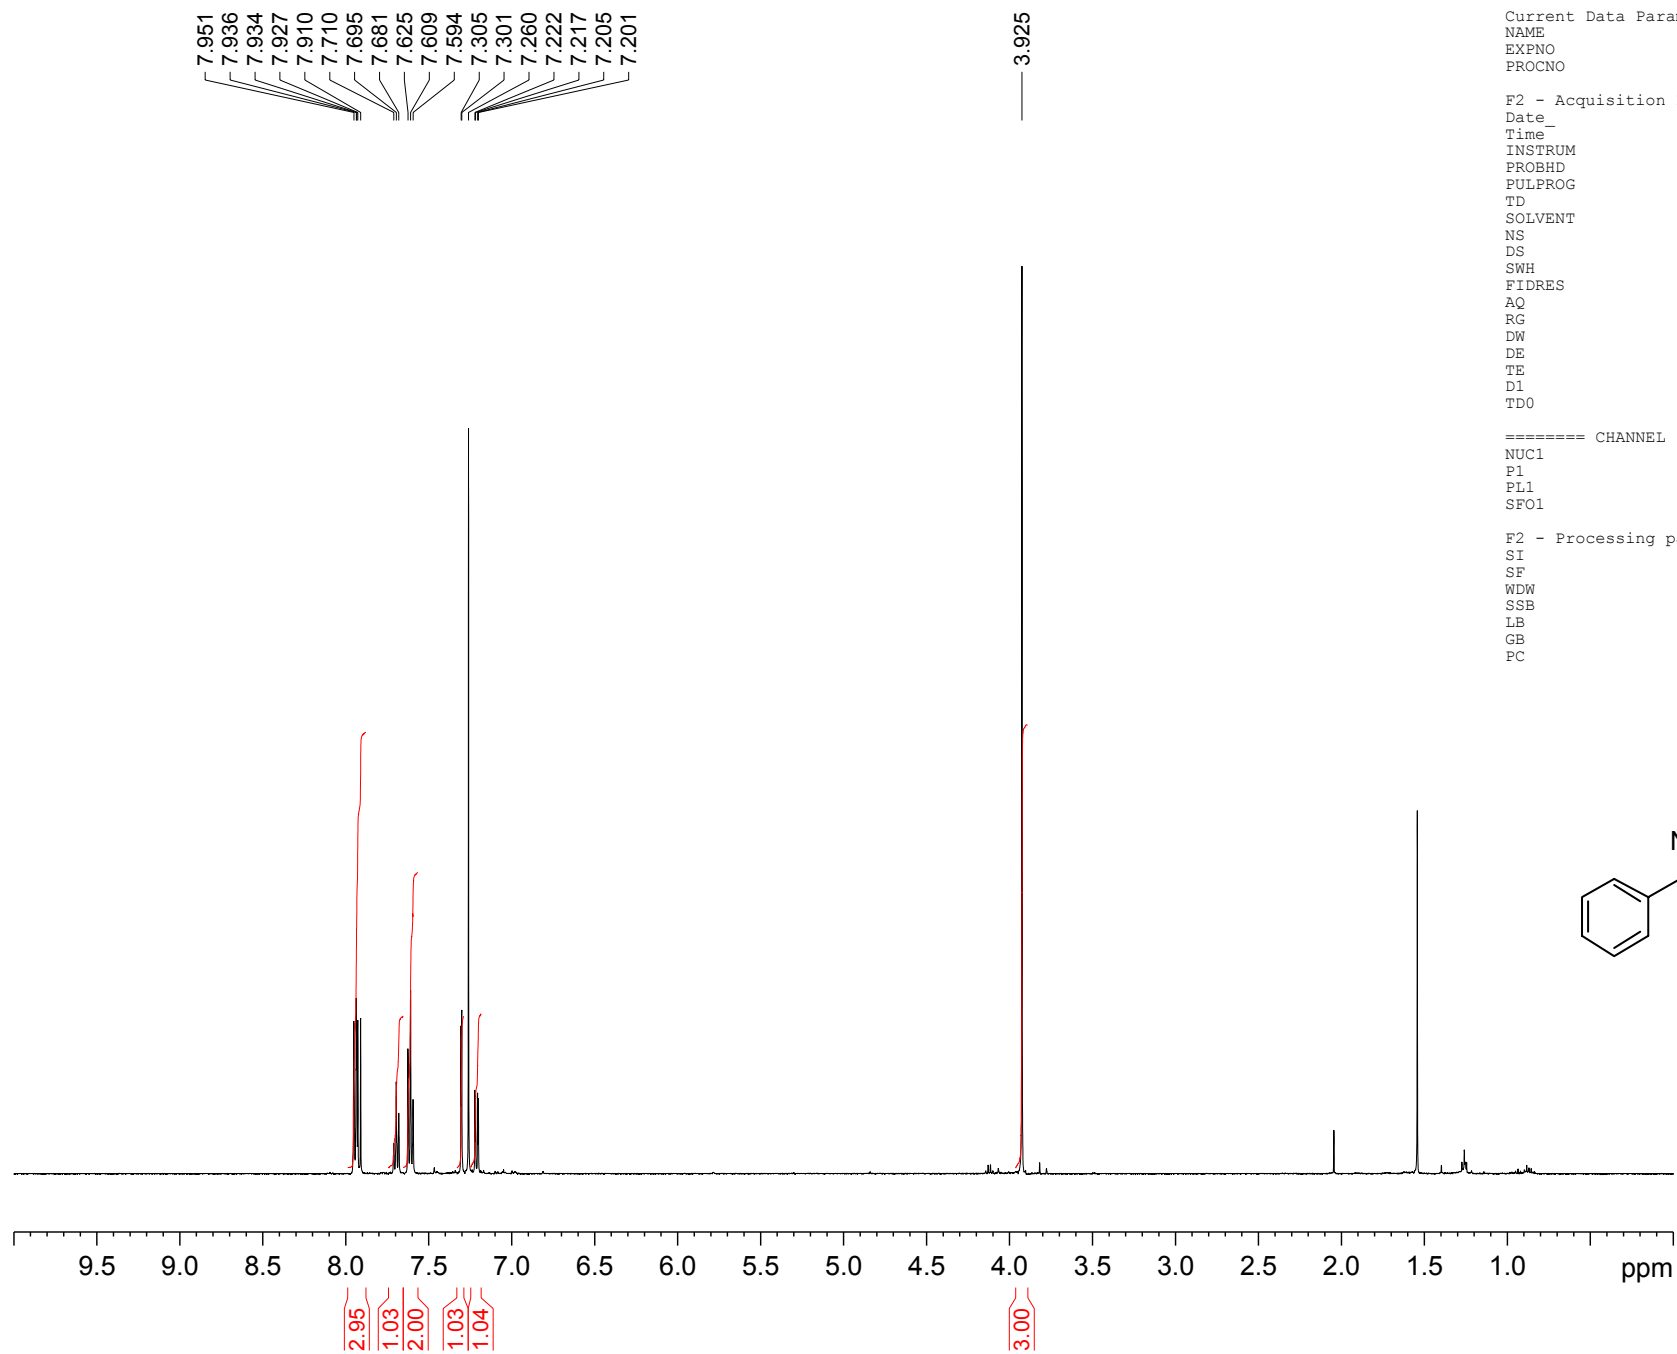

## Current Data Parameters

NAME FT246  
EXPNO 2  
PROCNO 1

## F2 - Acquisition Parameters

Date\_ 20071221  
Time 14.28  
INSTRUM spect  
PROBHD 5 mm PABBO BB-  
PULPROG zg30  
TD 65536  
SOLVENT CDCl3  
NS 16  
DS 2  
SWH 7002.801 Hz  
FIDRES 0.106854 Hz  
AQ 4.6793203 sec  
RG 1440  
DW 71.400 usec  
DE 6.50 usec  
TE 297.5 K  
D1 1.00000000 sec  
TD0 1

## ===== CHANNEL f1 =====

NUC1 1H  
P1 10.76 usec  
PL1 0.00 dB  
SFO1 500.3932525 MHz

## F2 - Processing parameters

SI 32768  
SF 500.3900163 MHz  
WDW EM  
SSB 0  
LB 0.30 Hz  
GB 0  
PC 1.00

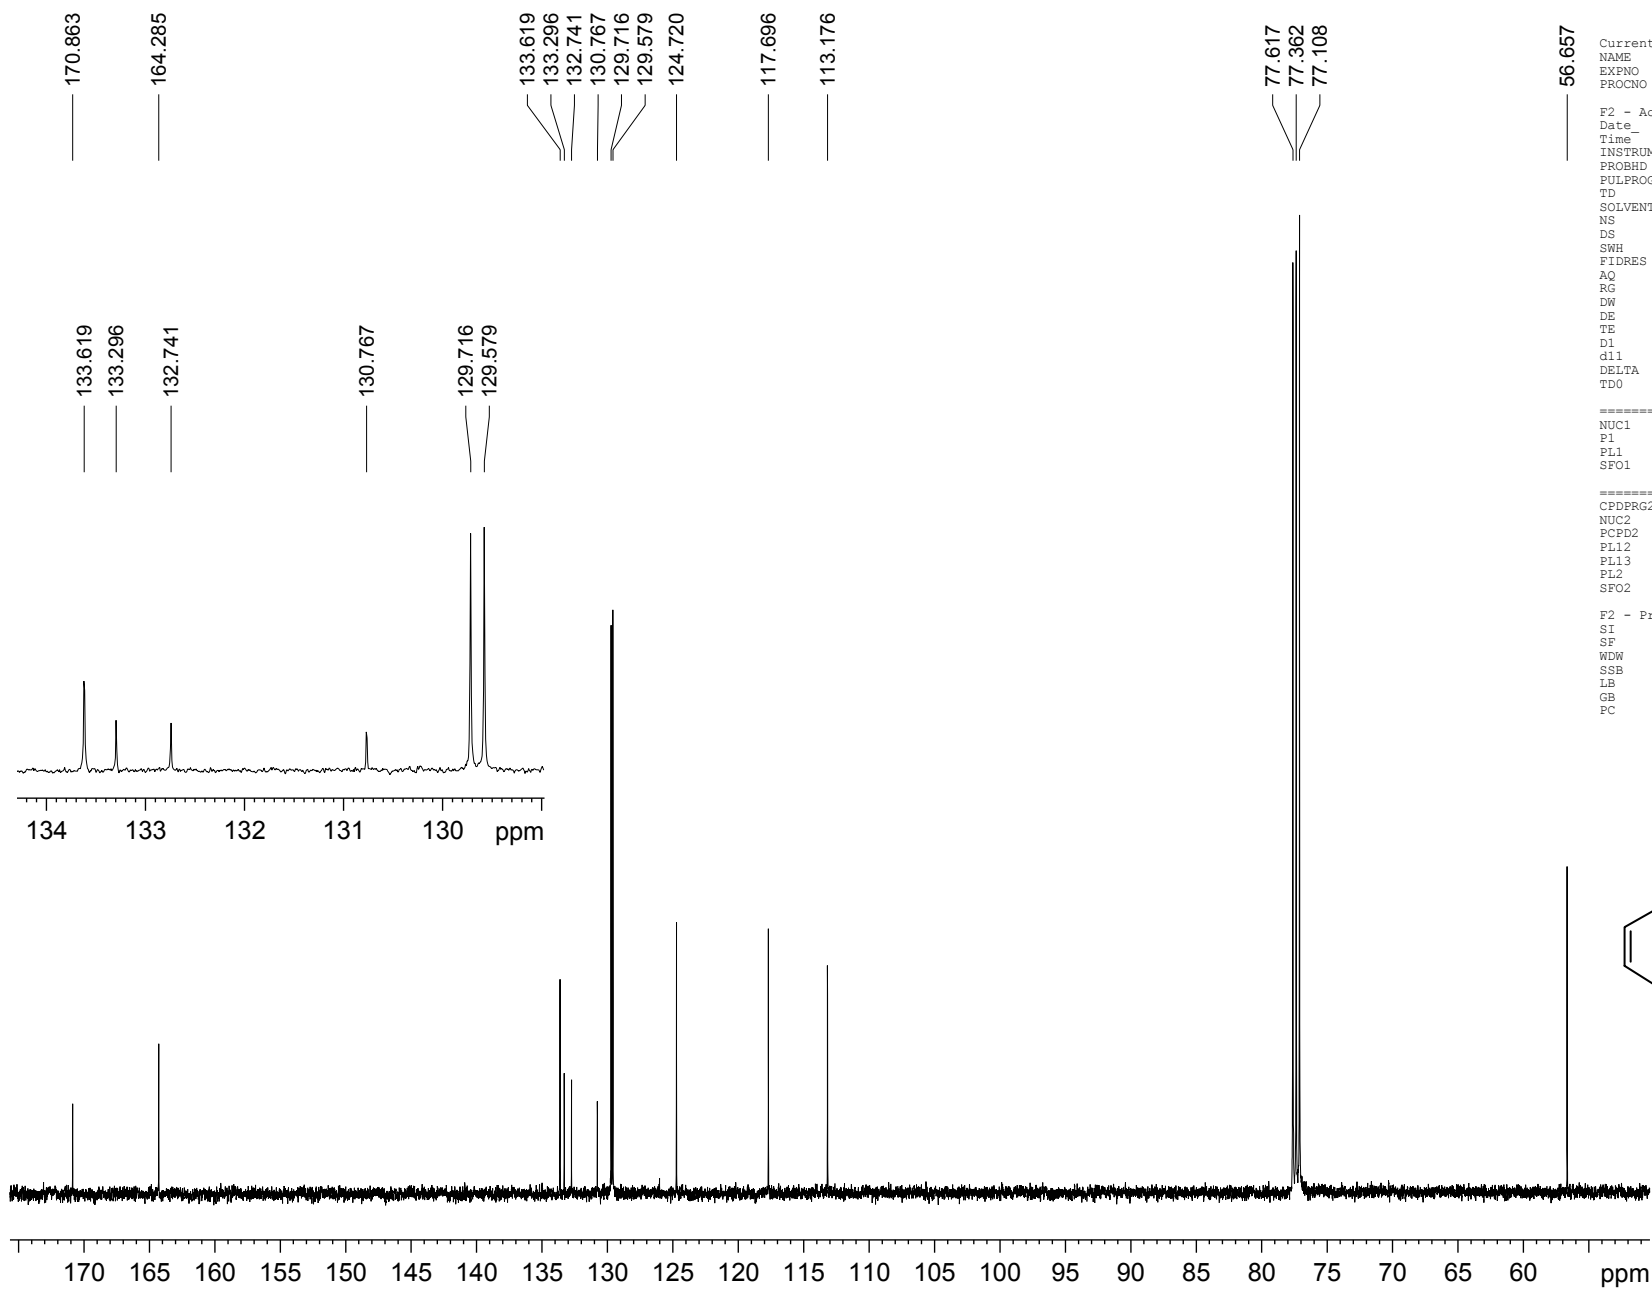

```

Current Data Parameters
NAME          FT246
EXPNO        4
PROCNO       1

F2 - Acquisition Parameters
Date_        20080923
Time         9.47
INSTRUM      spect
PROBHD       5 mm PABBO BB-
PULPROG      zgpg30
TD           65536
SOLVENT      CDCl3
NS           205
DS           4
SWH          29761.904 Hz
FIDRES       0.454131 Hz
AQ           1.1010548 sec
RG           456
DW           16.800 usec
DE           6.50 usec
TE           298.4 K
D1           2.0000000 sec
d11          0.0300000 sec
DELTA        1.89999998 sec
TD0          1

===== CHANNEL f1 =====
NUC1          13C
P1            7.50 usec
PL1           1.00 dB
SFO1          125.8357479 MHz

===== CHANNEL f2 =====
CPDPRG2      waltz16
NUC2          1H
PCPD2        80.00 usec
PL12         17.43 dB
PL13         18.43 dB
PL2          0.00 dB
SFO2          500.3920016 MHz

F2 - Processing parameters
SI            32768
SF            125.8231264 MHz
WDW           EM
SSB           0
LB            1.00 Hz
GB            0
PC            1.40

```

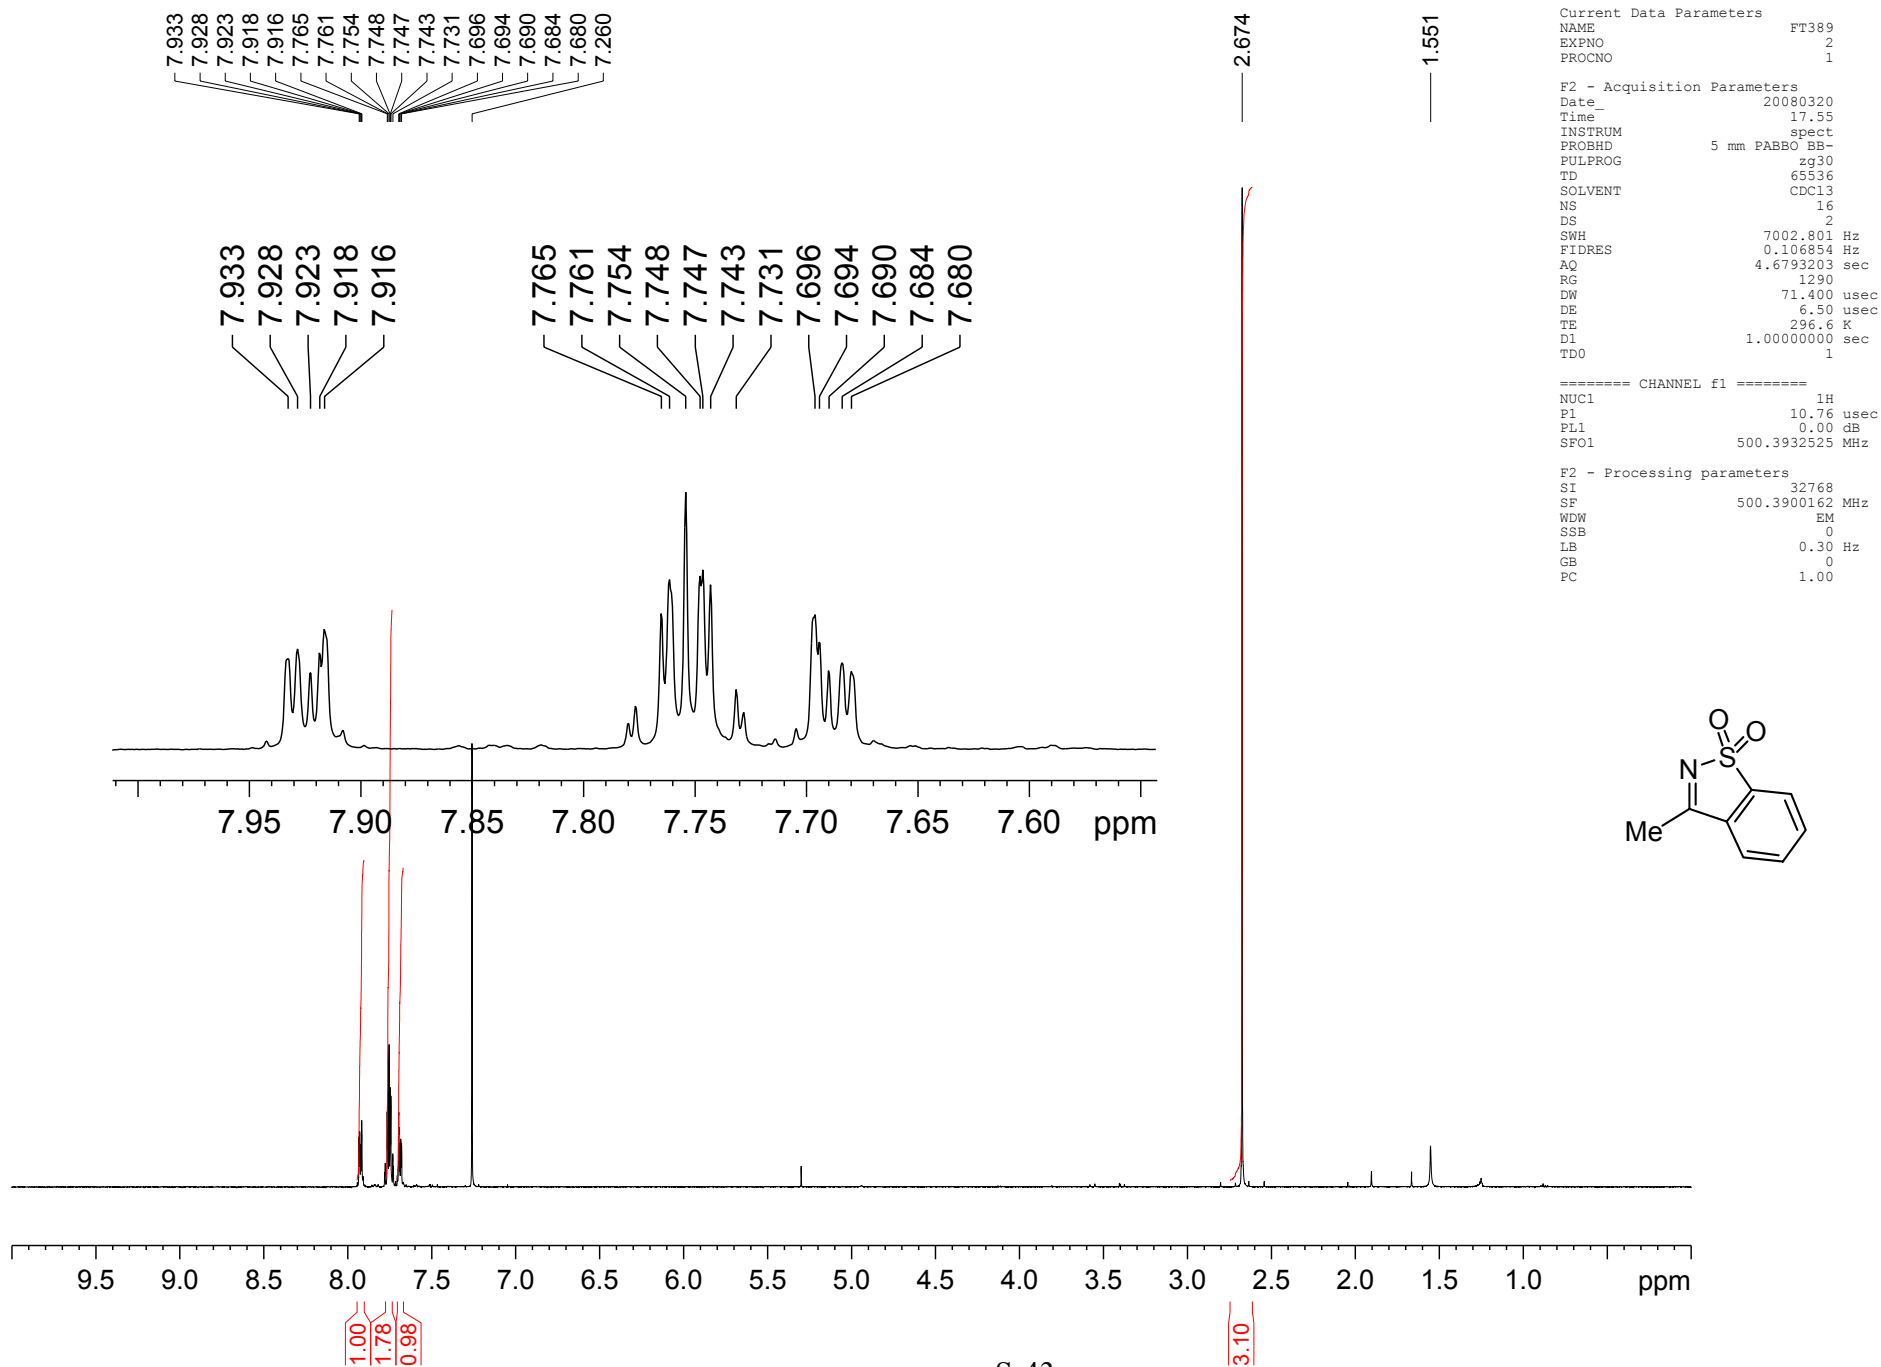

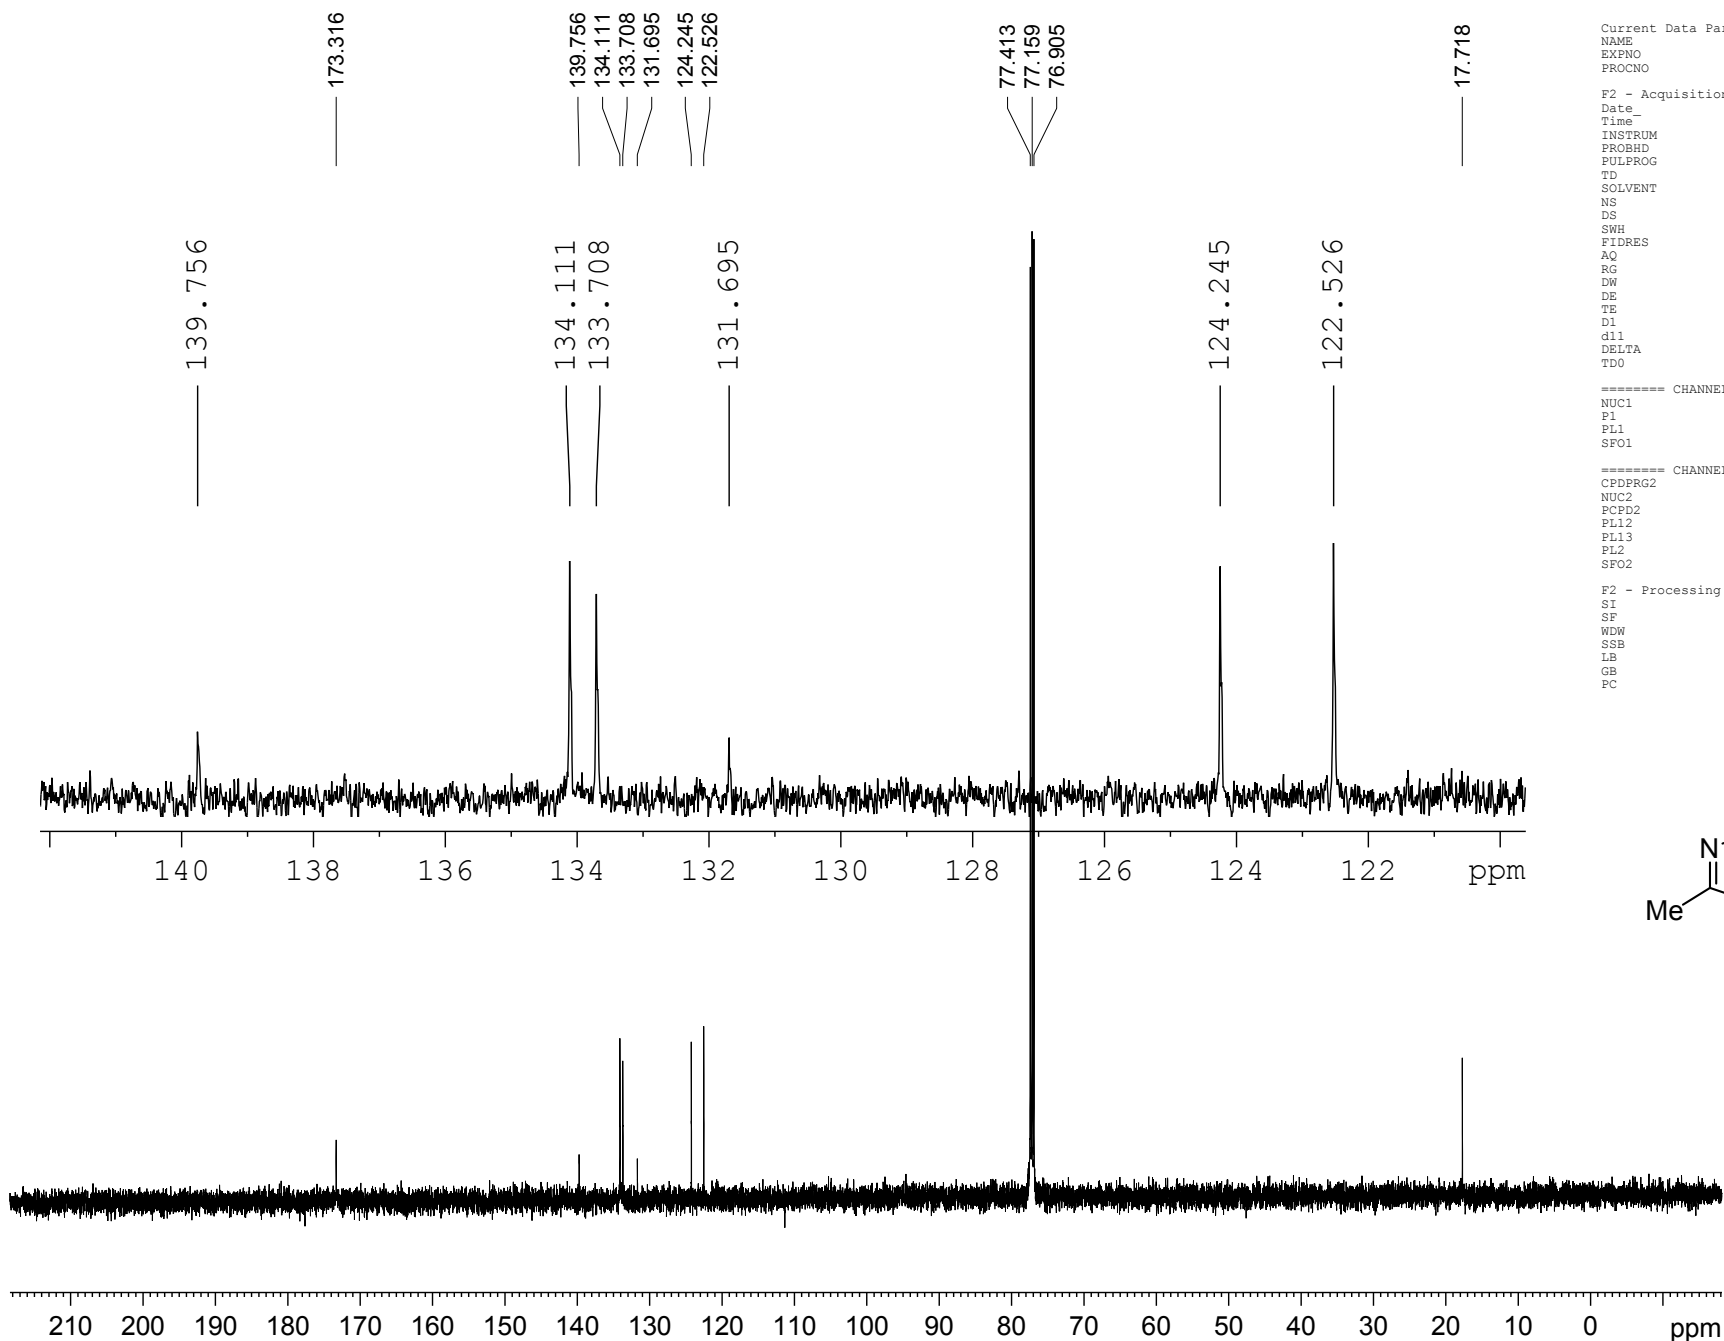

```

Current Data Parameters
NAME          FT389
EXPNO         4
PROCNO        1

F2 - Acquisition Parameters
Date_         20080929
Time          18.08
INSTRUM       spect
PROBHD        5 mm PABBO BB-
PULPROG       zgpg30
TD            65536
SOLVENT       CDCl3
NS            194
DS            4
SWH           29761.904 Hz
FIDRES        0.454131 Hz
AQ            1.1010548 sec
RG            456
DW            16.800 usec
DE            6.50 usec
TE            298.7 K
D1            2.00000000 sec
d11           0.03000000 sec
DELTA         1.89999998 sec
TDO           1

===== CHANNEL f1 =====
NUC1          13C
P1            7.50 usec
PL1           1.00 dB
SFO1          125.8357479 MHz

===== CHANNEL f2 =====
CPDPRG2       waltz16
NUC2          1H
PCPD2         80.00 usec
PL12          17.43 dB
PL13          18.43 dB
PL2           0.00 dB
SFO2          500.3920016 MHz

F2 - Processing parameters
SI            32768
SF            125.8231500 MHz
WDW           EM
SSB           0
LB            1.00 Hz
GB            0
PC            1.40

```

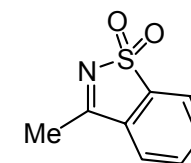

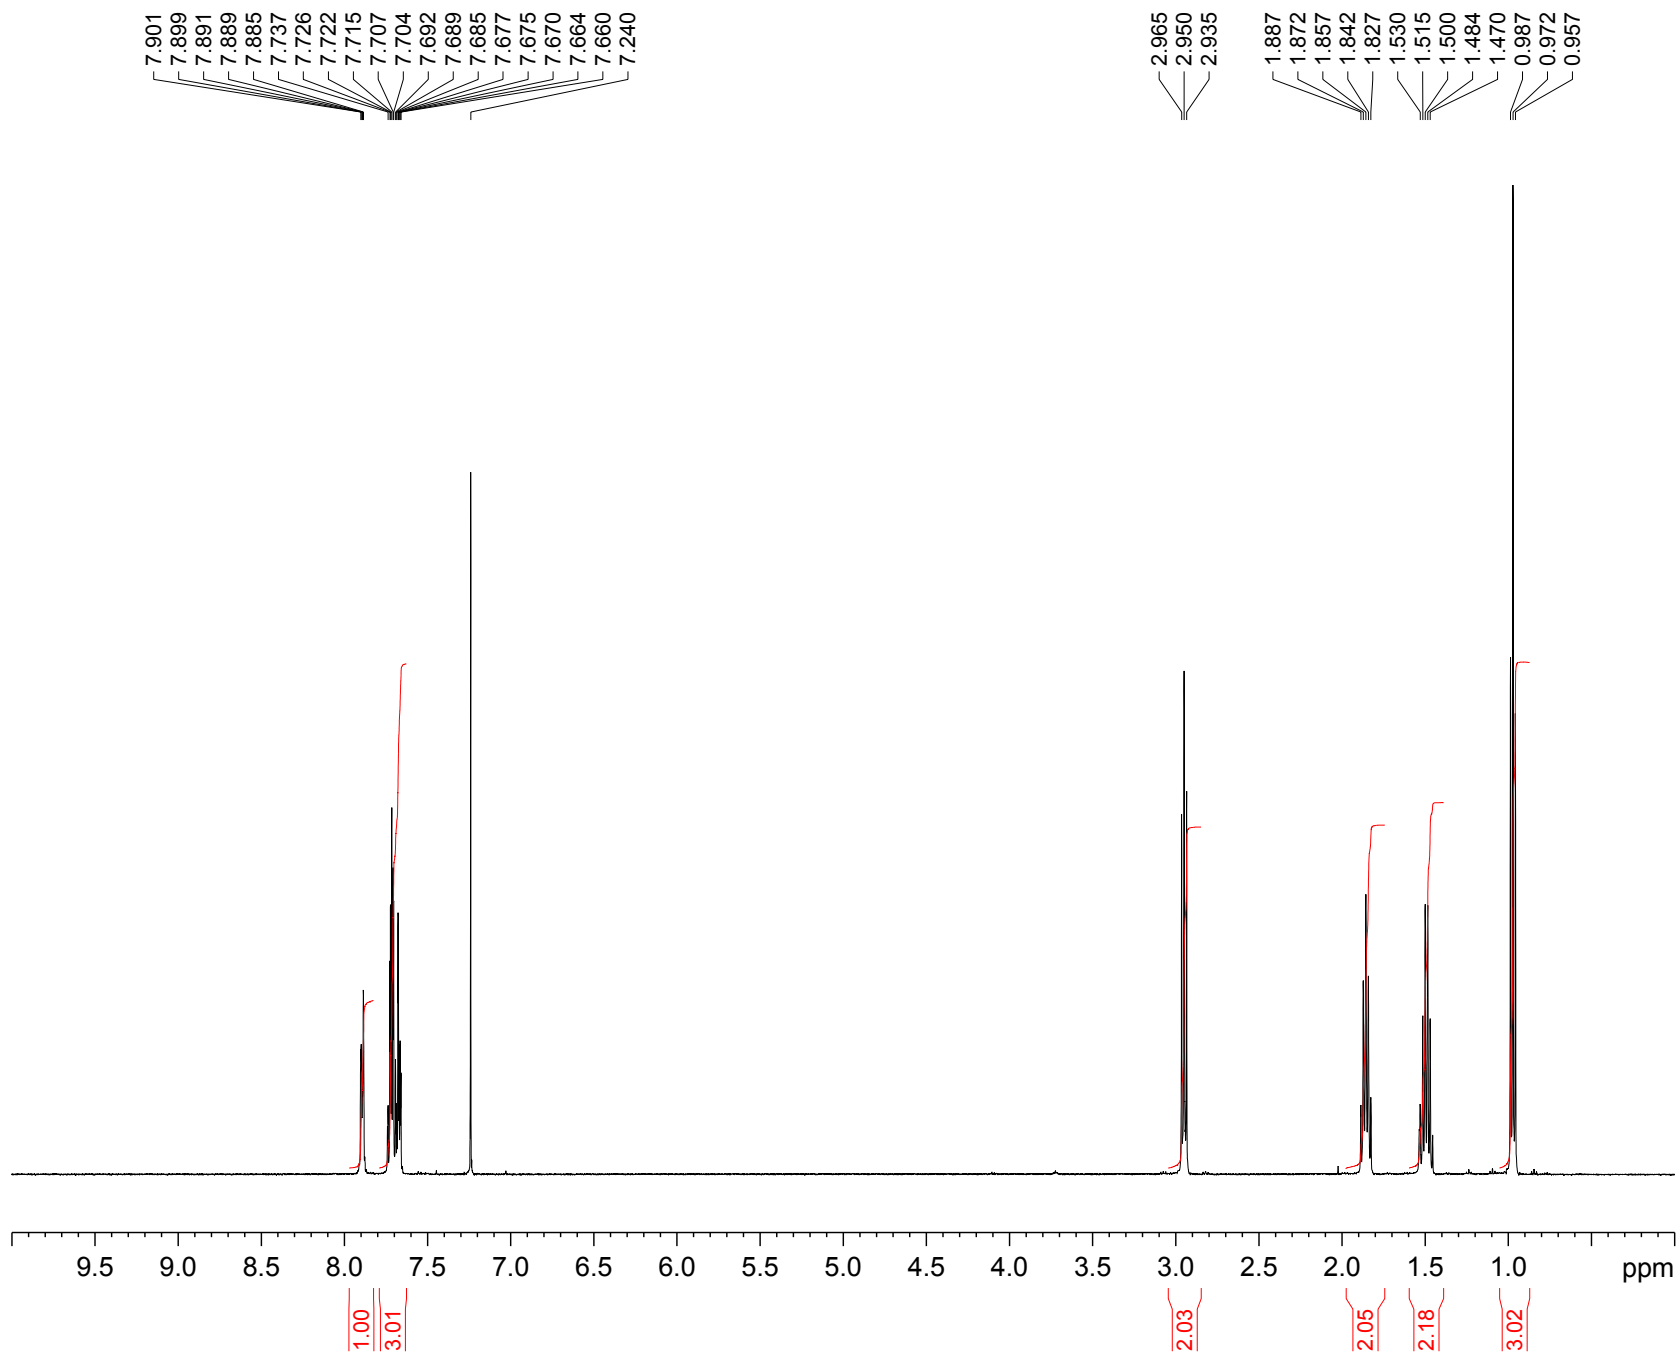

```

Current Data Parameters
NAME          FT190
EXPNO         2
PROCNO        1

F2 - Acquisition Parameters
Date_         20071030
Time_         1.19
INSTRUM       spect
PROBHD        5 mm PABBO BB
PULPROG       zg30
TD            65536
SOLVENT       CDCl3
NS            8
DS            2
SWH           7002.801 Hz
FIDRES        0.106854 Hz
AQ            4.6793203 sec
RG            456
DW            71.400 usec
DE            6.50 usec
TE            296.1 K
D1            1.00000000 sec
TD0           1

----- CHANNEL f1 -----
NUC1          1H
P1            10.76 usec
PL1           0.00 dB
SFO1          500.3932525 MHz

F2 - Processing parameters
SI            32768
SF            500.3900263 MHz
WDW           EM
SSB           0
LB            0.30 Hz
GB            0
PC            1.00

```

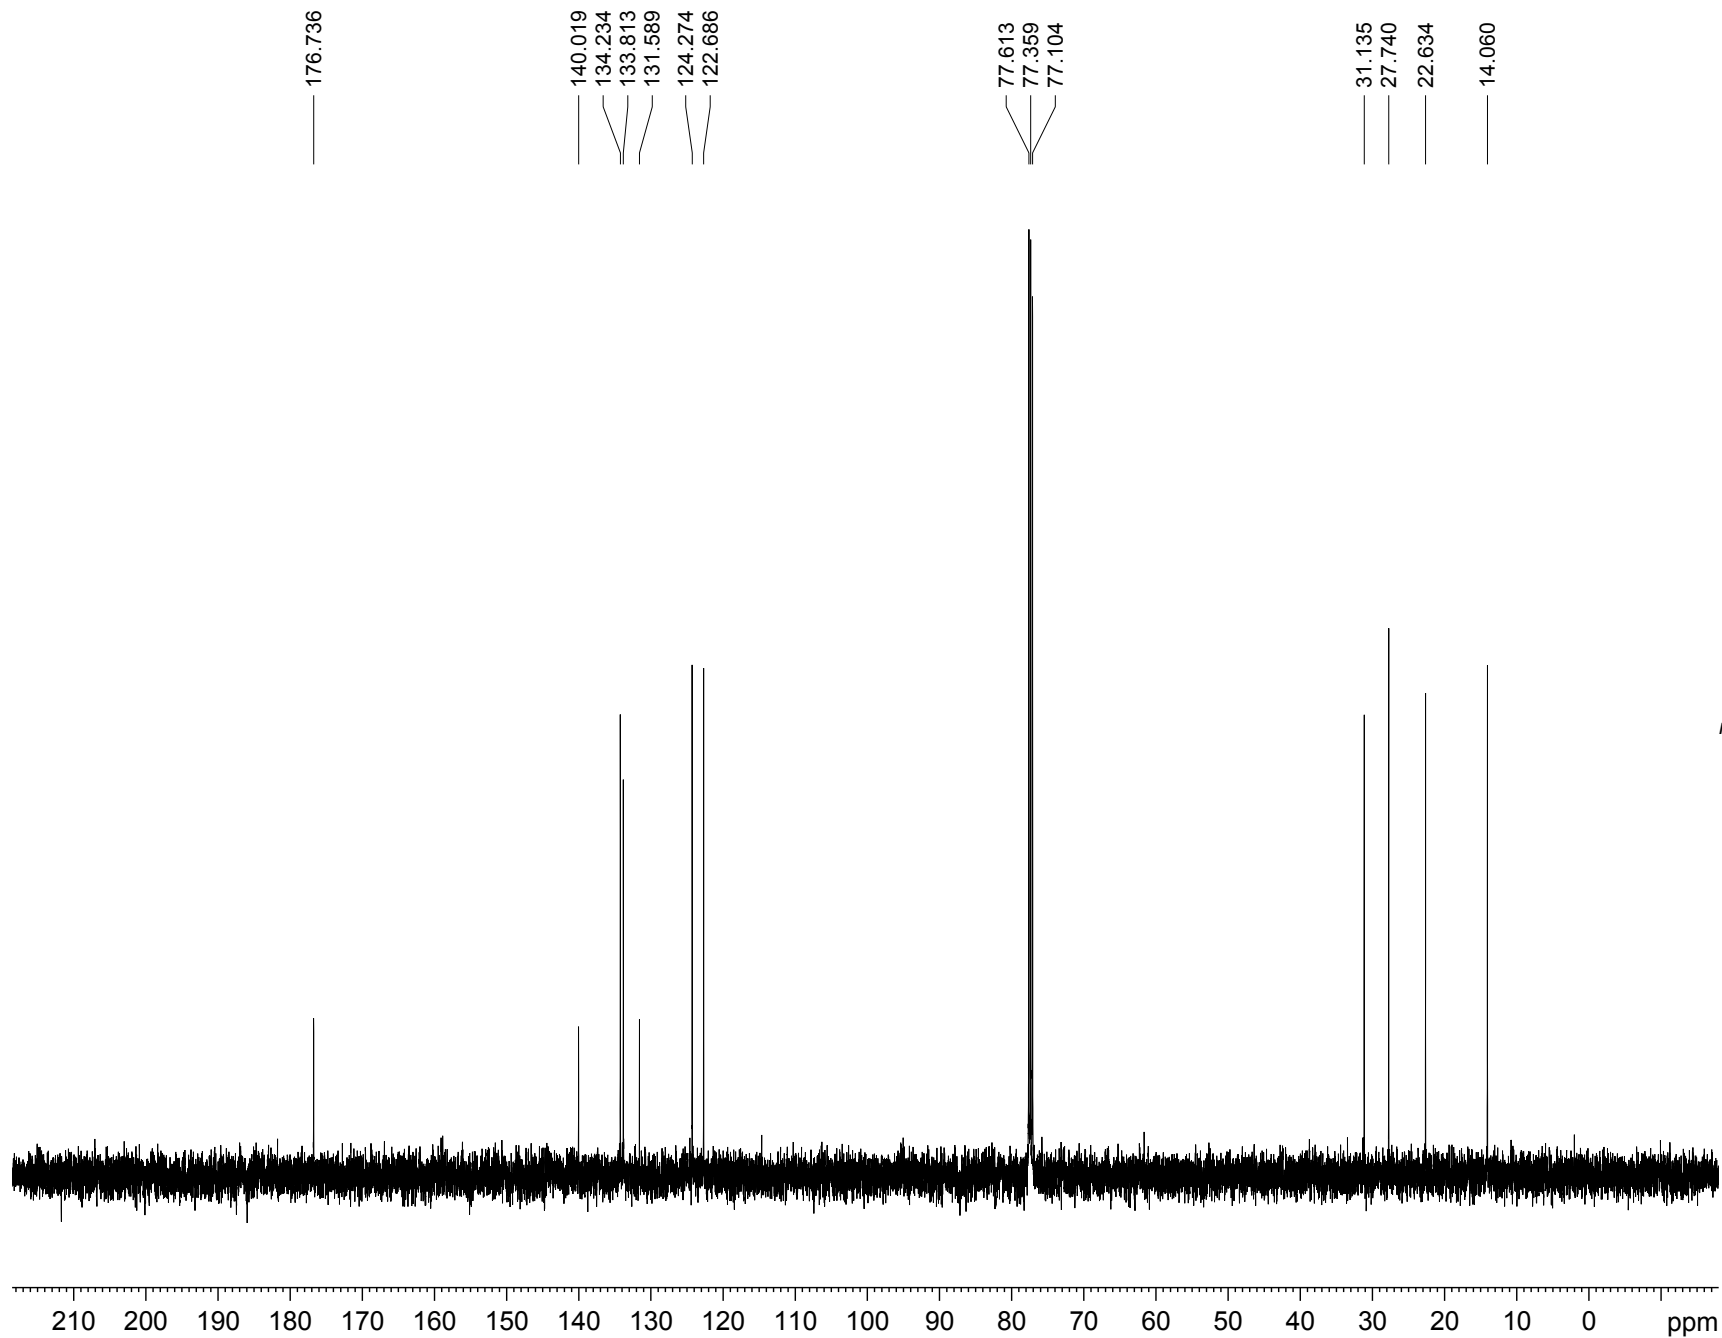

```
Current Data Parameters F190
NAME
EXPRO 4
PROCNO 1
F2 - Acquisition Parameters
Date 20080929
Time 18.22
INSTRUM spect
PROBHD 5 mm PABBO BB-
PULPROG zgpg30
TD 65536
SOLVENT cdcl3
NS 7
DS 4
SWH 29761.904 Hz
FIDRES 0.454131 Hz
AQ 1.101058 sec
RG 456
AQ 16.800 usec
DE 6.50 usec
TE 298.3 K
D1 2.00000000 sec
d11 0.03000000 sec
DELTA 1.89999998 sec
TD0 1
===== CHANNEL f1 =====
NUC1 13C
P1 7.50 usec
PL1 1.00 dB
SFO1 125.8357479 MHz
===== CHANNEL f2 =====
PCPD22 waitz16
NUC2 1H
PCPD2 80.00 usec
PL12 17.43 dB
PL13 18.43 dB
PL2 0.00 dB
SFO2 500.3920016 MHz
F2 - Processing parameters
SI 32768
SF 125.8231309 MHz
WDW EM
SSB 0
LB 1.00 Hz
GB 0
PC 1.40
```

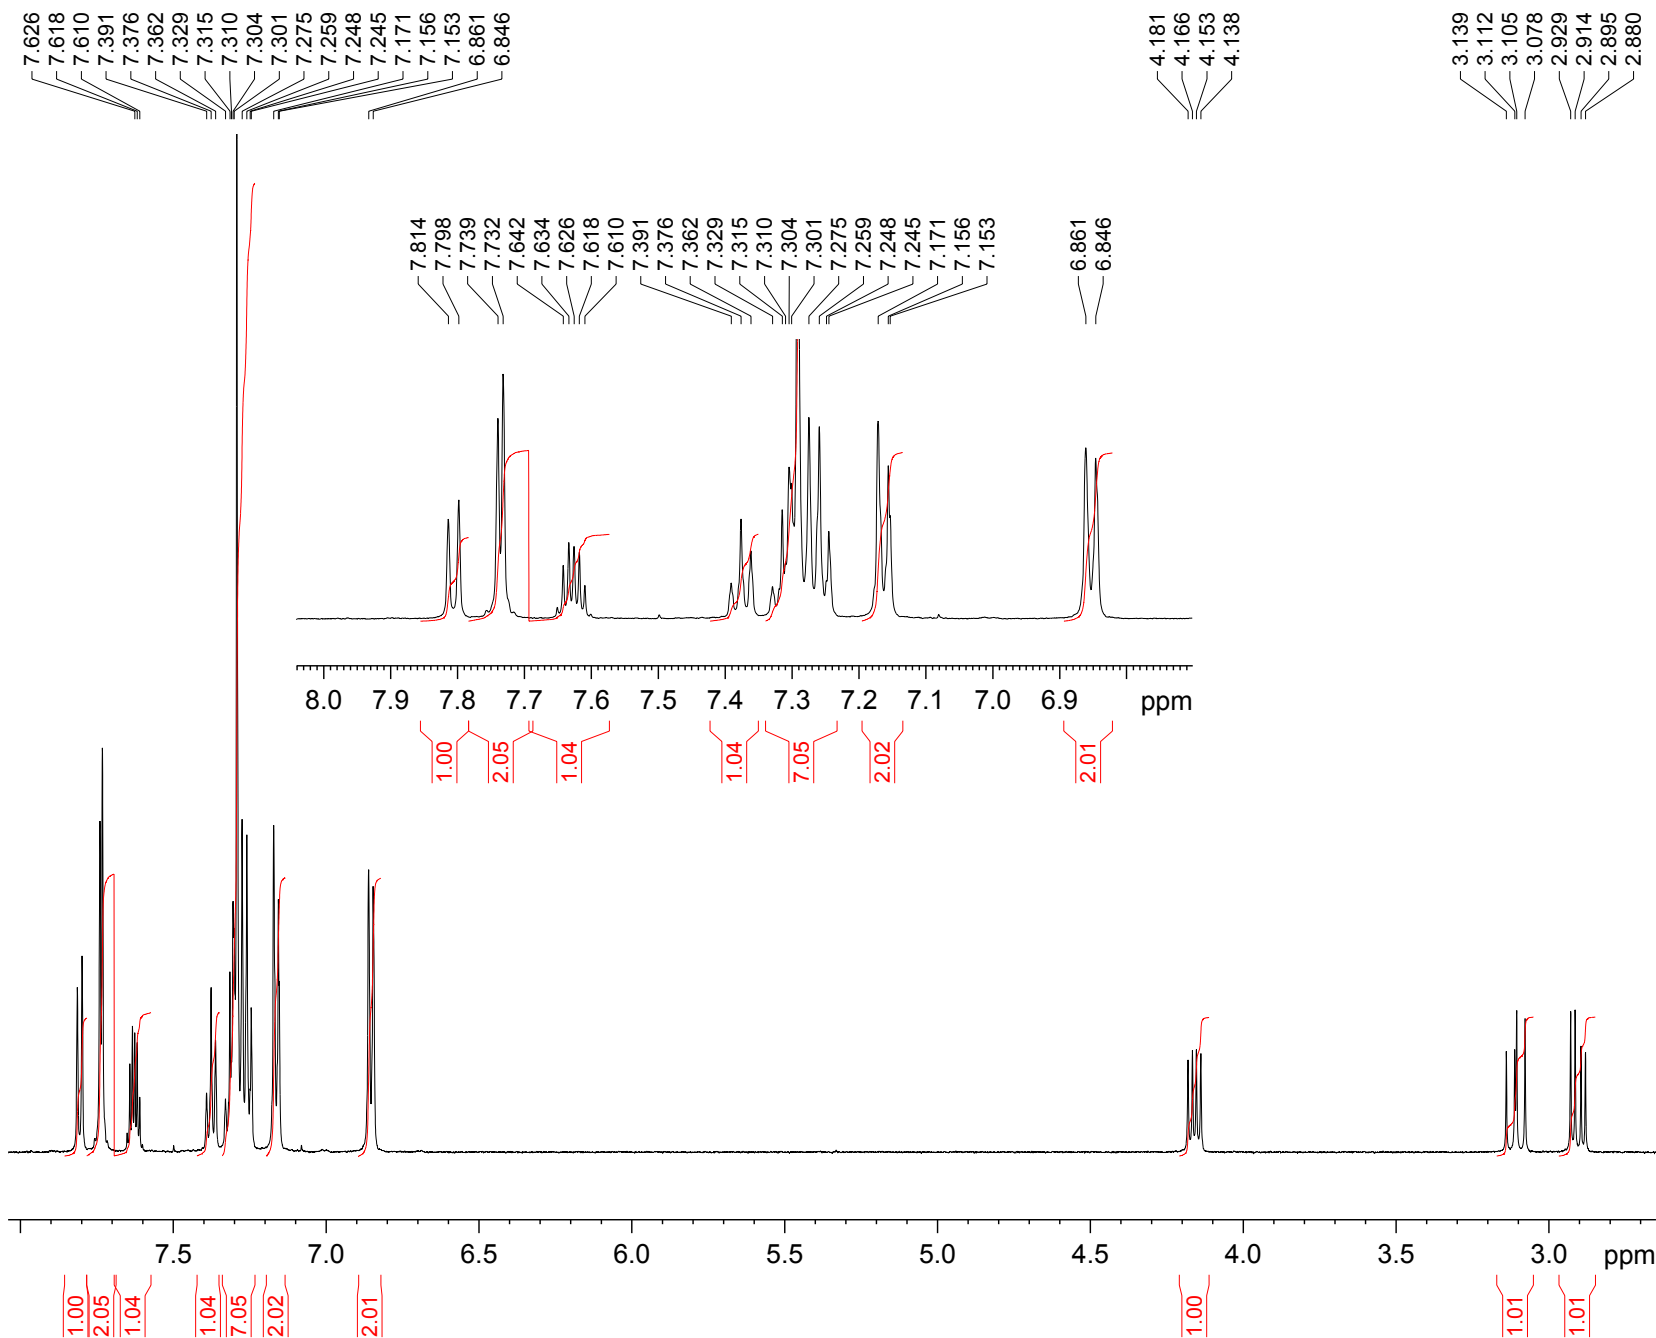

```

Current Data Parameters
NAME          MR128-3crystal
EXPNO         2
PROCNO        1

F2 - Acquisition Parameters
Date_         20080103
Time          9.36
INSTRUM       spect
PROBHD        5 mm PABBO BB-
PULPROG       zg30
TD            65536
SOLVENT       CDCl3
NS            10
DS            2
SWH           7002.801 Hz
FIDRES        0.106854 Hz
AQ            4.6793203 sec
RG            1150
DW            71.400 usec
DE            6.50 usec
TE            298.1 K
D1            1.00000000 sec
TD0           1

===== CHANNEL f1 =====
NUC1           1H
P1            10.76 usec
PL1            0.00 dB
SFO1           500.3932525 MHz

F2 - Processing parameters
SI            32768
SF            500.3900000 MHz
WDW           EM
SSB           0
LB            0.30 Hz
GB            0
PC            1.00
    
```

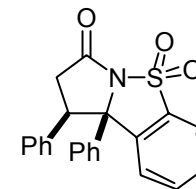

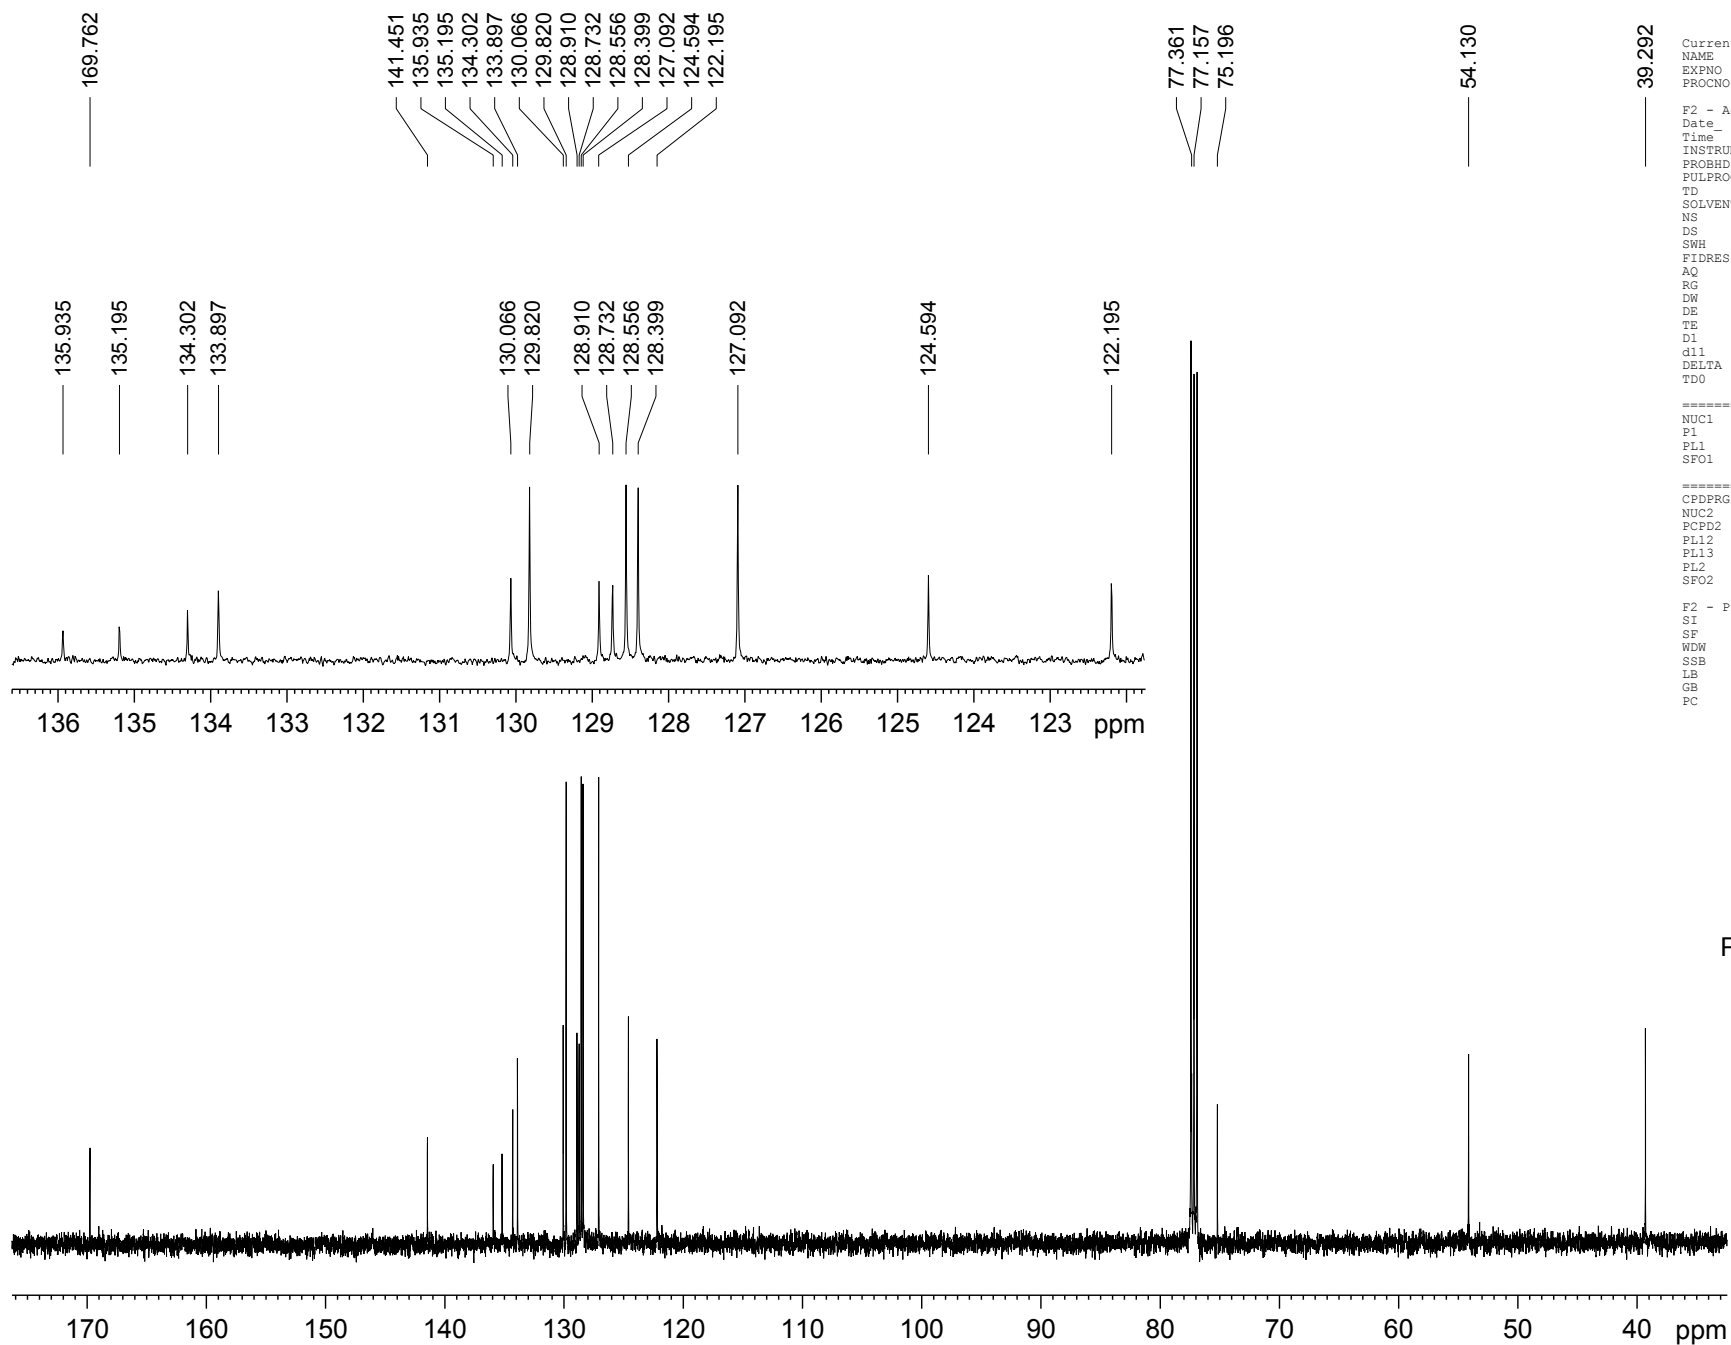

```

Current Data Parameters
NAME MR128-1
EXPNO 3
PROCNO 1

F2 - Acquisition Parameters
Date_ 20071115
Time 8.27
INSTRUM spect
PROBHD 5 mm PABBO BB-
PULPROG zgpg30
TD 65536
SOLVENT CDCl3
NS 87
DS 4
SWH 29761.904 Hz
FIDRES 0.454131 Hz
AQ 1.1010548 sec
RG 724
DW 16.800 usec
DE 6.50 usec
TE 300.0 K
D1 2.00000000 sec
d11 0.03000000 sec
DELTA 1.89999998 sec
TD0 1

===== CHANNEL f1 =====
NUC1 13C
P1 7.50 usec
PL1 1.00 dB
SFO1 125.8357479 MHz

===== CHANNEL f2 =====
CPDPRG2 waltz16
NUC2 1H
PCPD2 80.00 usec
PL12 17.43 dB
PL13 18.43 dB
PL2 0.00 dB
SFO2 500.3920016 MHz

F2 - Processing parameters
SI 32768
SF 125.8231542 MHz
WDW EM
SSB 0
LB 1.00 Hz
GB 0
PC 1.40

```



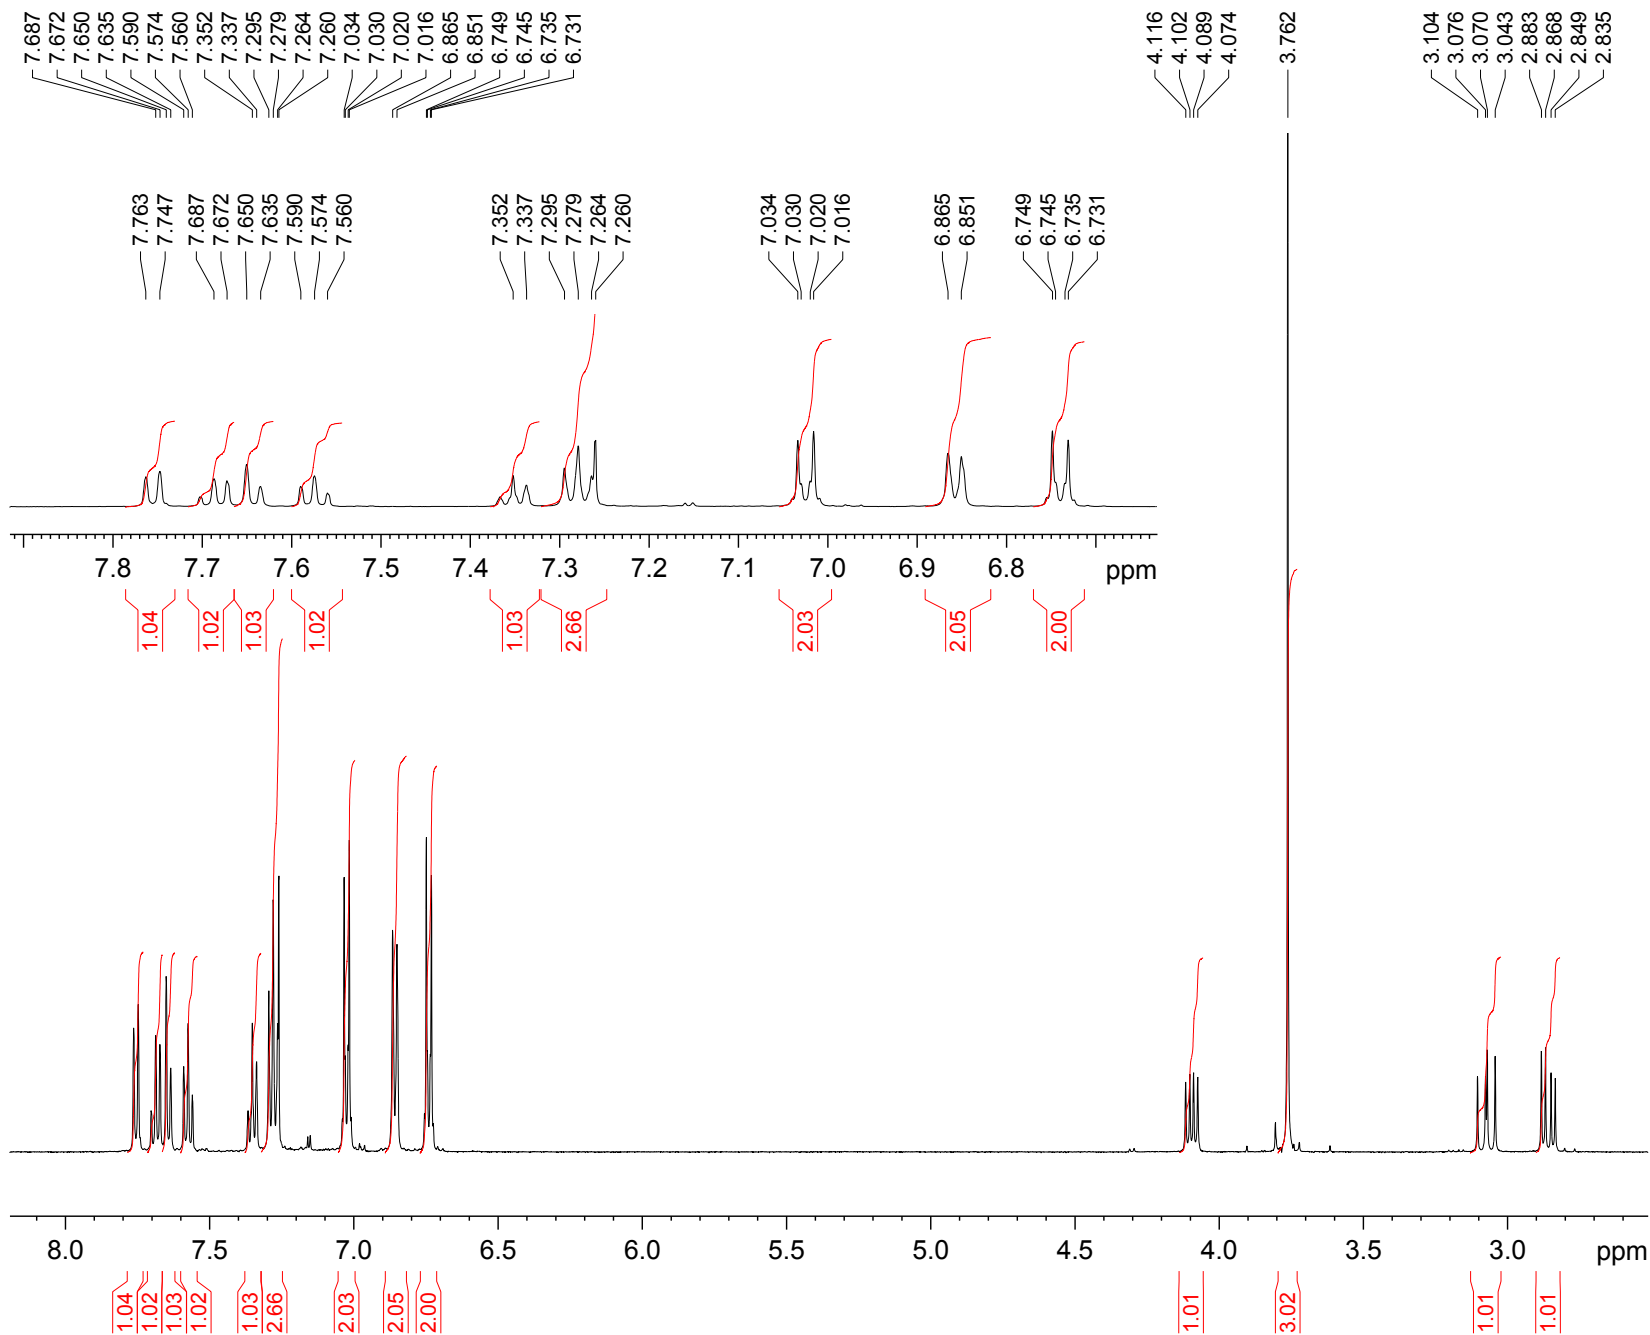

```

Current Data Parameters
NAME MR134-2cis
EXPNO 3
PROCNO 1

F2 - Acquisition Parameters
Date_ 20080315
Time_ 15.20
INSTRUM spect
PROBHD 5 mm PABBO BB-
PULPROG zg30
TD 65536
SOLVENT CDCl3
NS 16
DS 2
SWH 7002.801 Hz
FIDRES 0.106854 Hz
AQ 4.6793203 sec
RG 406
DW 71.400 usec
DE 6.50 usec
TE 296.5 K
D1 1.0000000 sec
TD0 1

===== CHANNEL f1 =====
NUC1 1H
P1 10.76 usec
PL1 0.00 dB
SFO1 500.3932525 MHz

F2 - Processing parameters
SI 32768
SF 500.3900160 MHz
WDW EM
SSB 0
LB 0.30 Hz
GB 0
PC 1.00
    
```

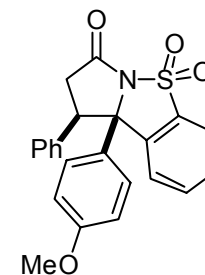

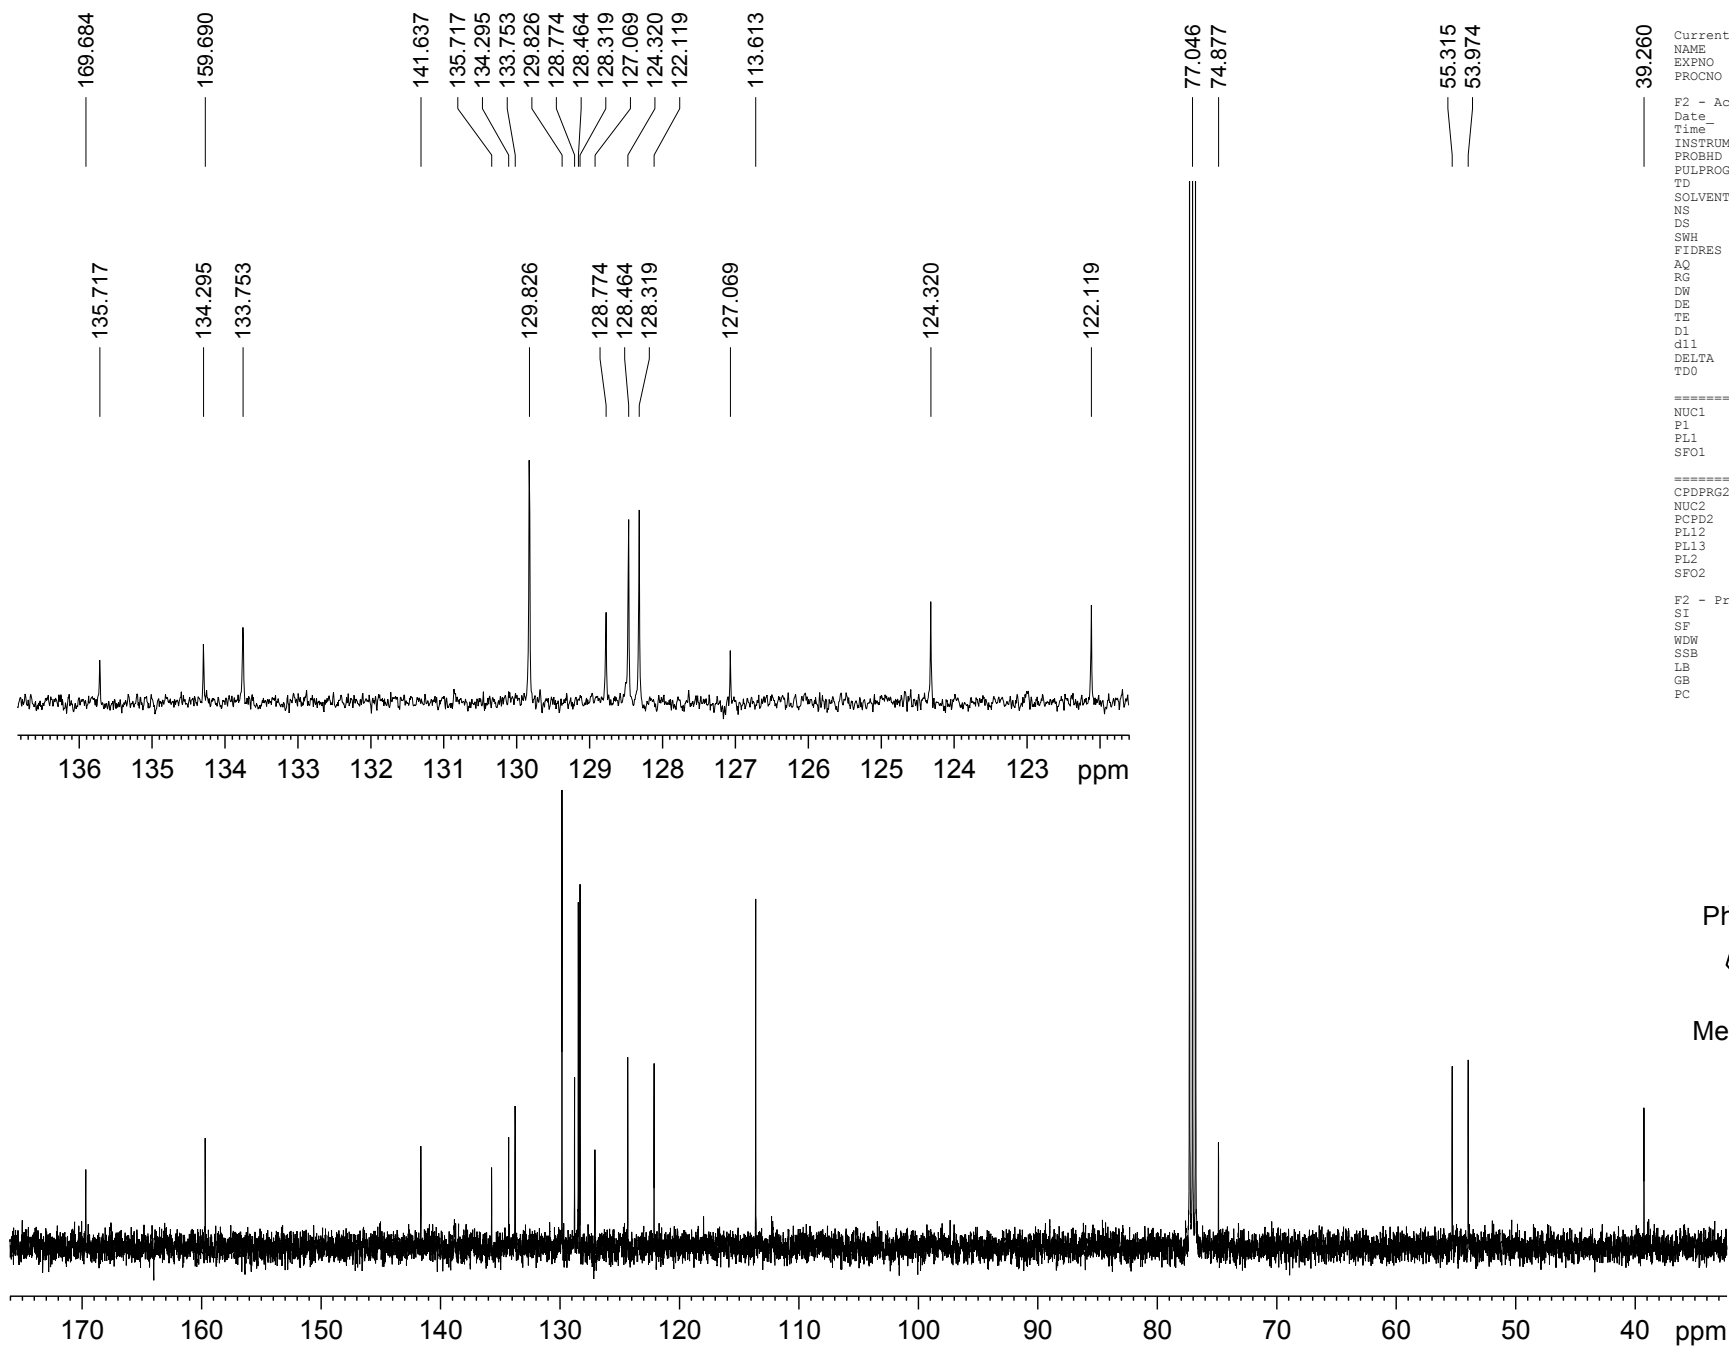

```

Current Data Parameters
NAME          MR134-2cis
EXPNO        2
PROCNO       1

F2 - Acquisition Parameters
Date_        20080313
Time         16.23
INSTRUM     spect
PROBHD      5 mm PABBO BB-
PULPROG     zgpg30
TD          65536
SOLVENT     CDCl3
NS          79
DS          4
SWH         29761.904 Hz
FIDRES     0.454131 Hz
AQ         1.1010548 sec
RG         812
DW         16.800 usec
DE         6.50 usec
TE         297.8 K
D1         2.00000000 sec
d11        0.03000000 sec
DELTA      1.89999998 sec
TDO        1

===== CHANNEL f1 =====
NUC1        13C
P1          7.50 usec
PL1         1.00 dB
SFO1        125.8357479 MHz

===== CHANNEL f2 =====
CPDPRG2     waltz16
NUC2        1H
PCPD2       80.00 usec
PL12        17.43 dB
PL13        18.43 dB
PL2         0.00 dB
SFO2        500.3920016 MHz

F2 - Processing parameters
SI          32768
SF          125.8231660 MHz
WDW         EM
SSB         0
LB          1.00 Hz
GB          0
PC          1.40

```

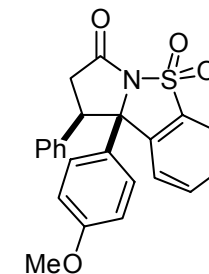

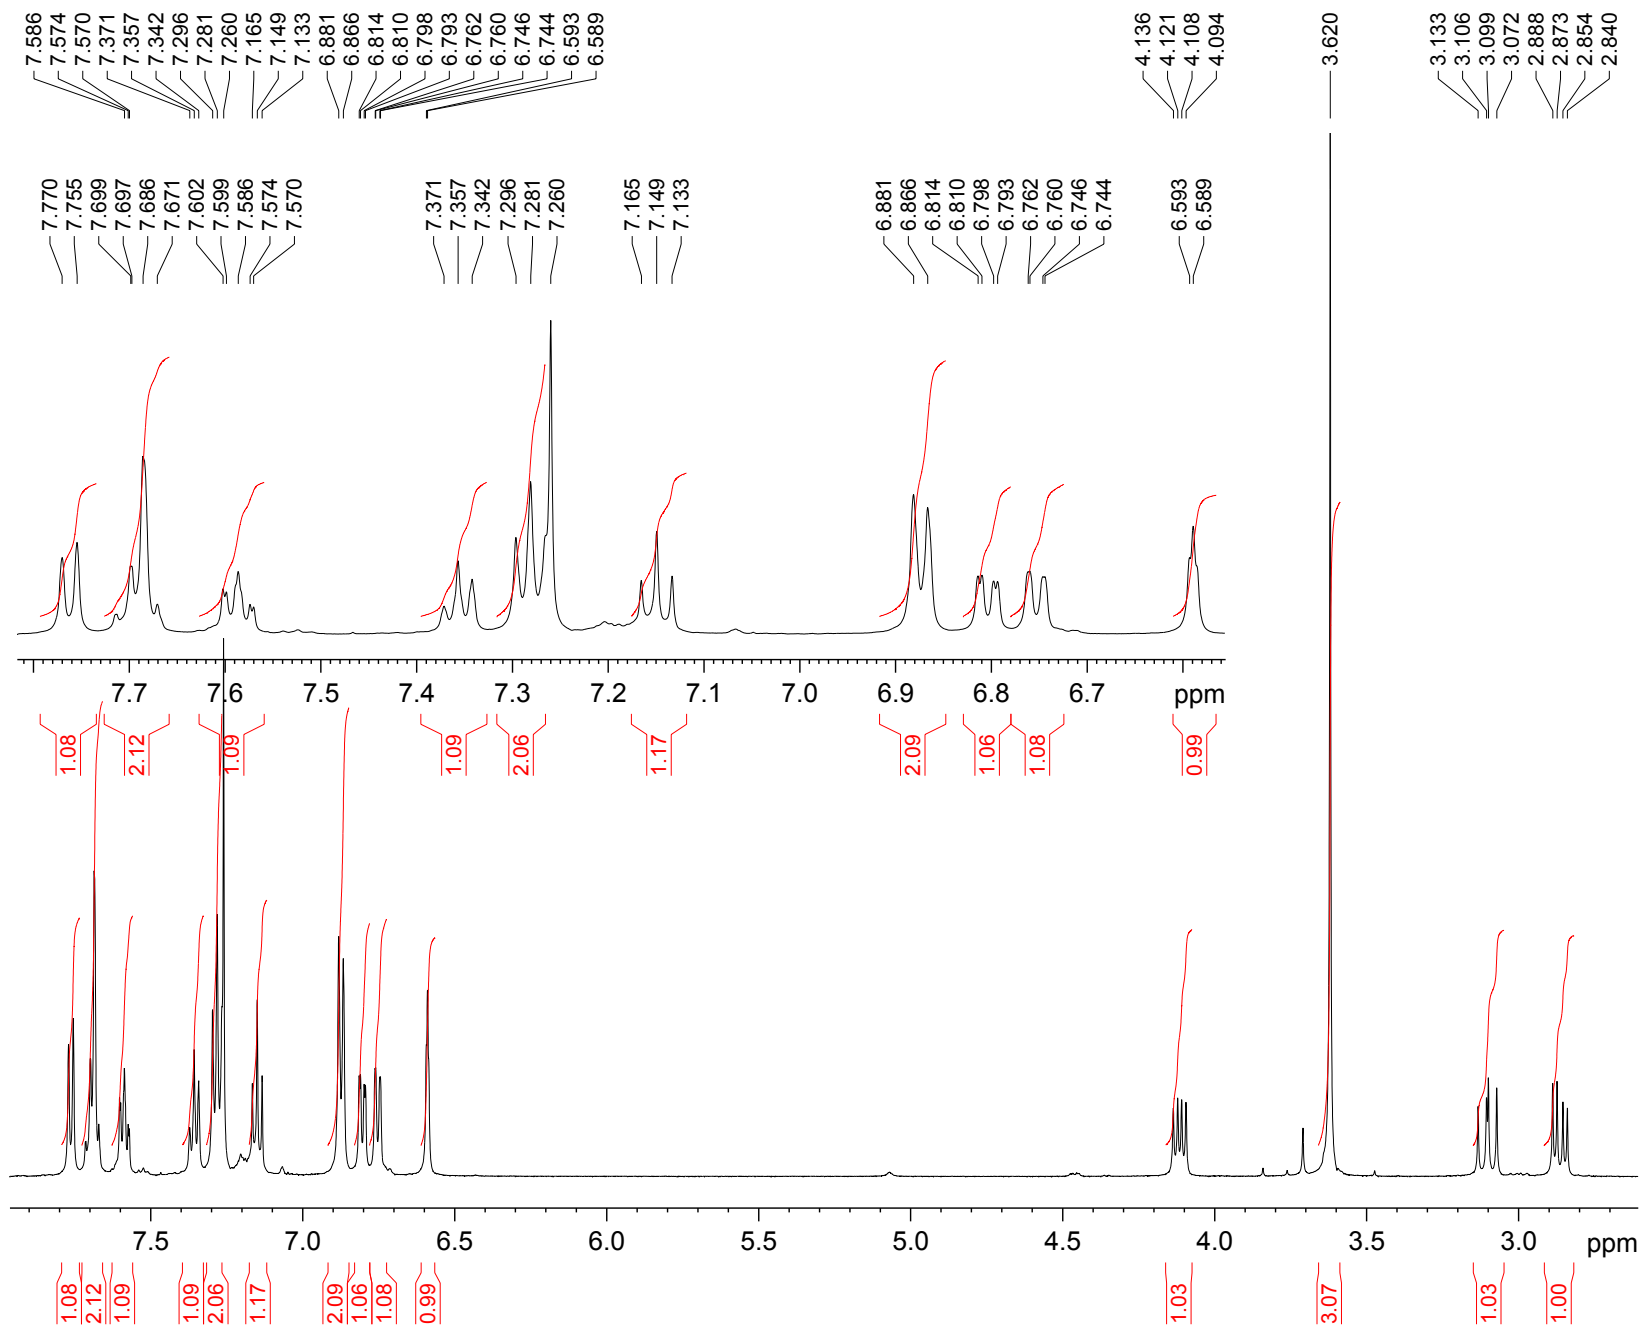

```

Current Data Parameters
NAME MR149-1
EXPNO 4
PROCNO 1

F2 - Acquisition Parameters
Date_ 20071218
Time 5.01
INSTRUM spect
PROBHD 5 mm PABBO BB-
PULPROG zg30
TD 65536
SOLVENT CDCl3
NS 16
DS 2
SWH 7002.801 Hz
FIDRES 0.106854 Hz
AQ 4.6793203 sec
RG 512
DW 71.400 usec
DE 6.50 usec
TE 297.8 K
D1 1.00000000 sec
TDO 1

===== CHANNEL f1 =====
NUC1 1H
P1 10.76 usec
PL1 0.00 dB
SFO1 500.3932525 MHz

F2 - Processing parameters
SI 32768
SF 500.3900160 MHz
WDW EM
SSB 0
LB 0.30 Hz
GB 0
PC 1.00

```

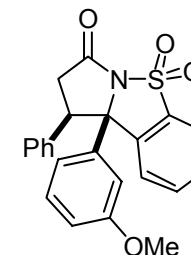

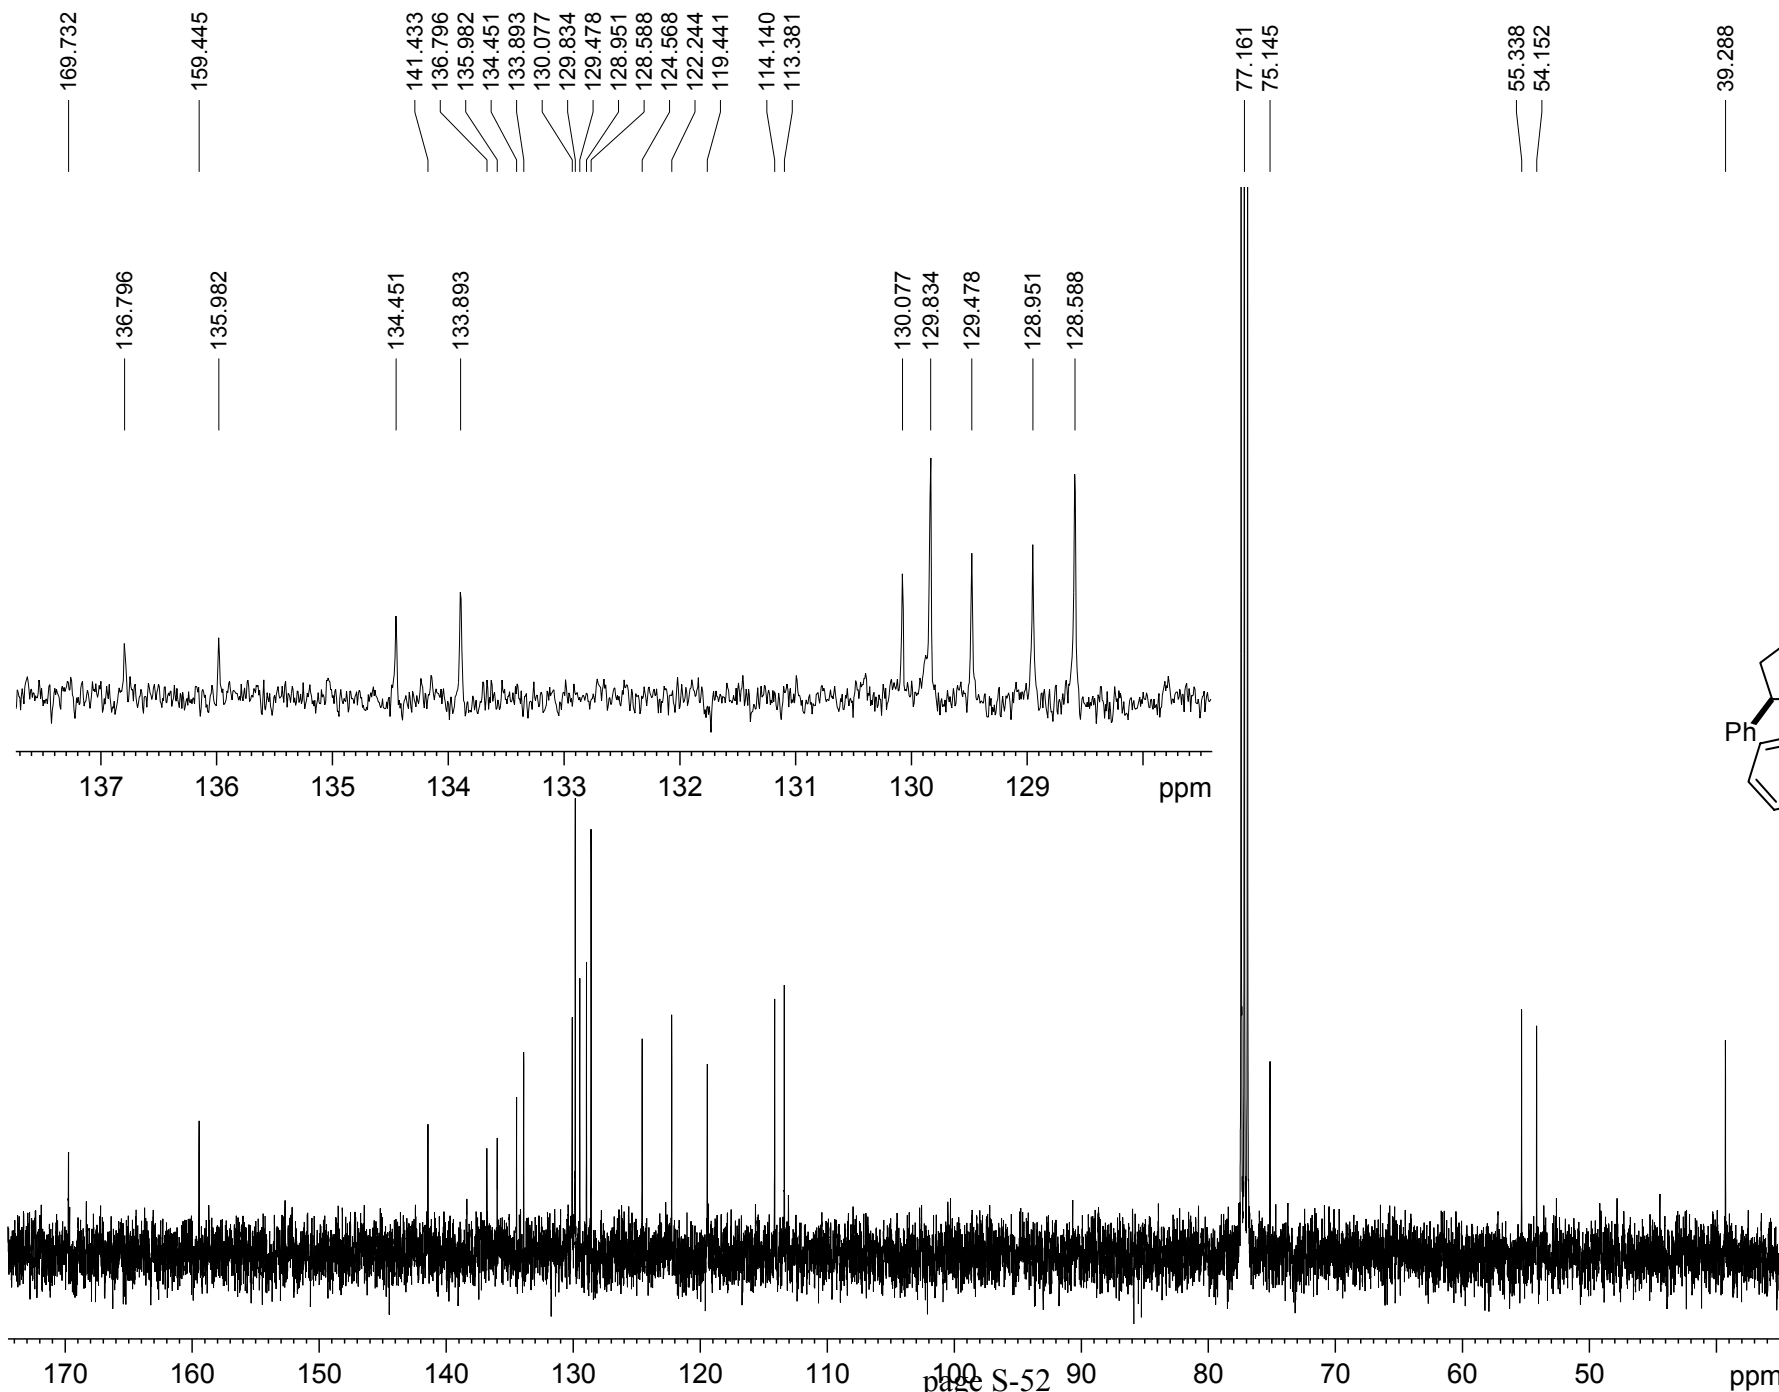

```

Current Data Parameters
NAME MR149-1
EXPNO 5
PROCNO 1

F2 - Acquisition Parameters
Date_ 20071218
Time 5.06
INSTRUM spect
PROBHD 5 mm PABBO BB-
PULPROG zgpg30
TD 65536
SOLVENT cdcl3
NS 41
DS 4
SWH 29761.904 Hz
FIDRES 0.454131 Hz
AQ 1.1101345 sec
RG 456
SW 16.800 usec
DE 6.50 usec
TE 298.4 K
D1 2.0000000 sec
d11 0.0300000 sec
DELTA 1.8999998 sec
TDO 1

===== CHANNEL f1 =====
NUC1 13C
P1 7.50 usec
PL1 1.00 dB
SFO1 125.8357473 MHz

===== CHANNEL f2 =====
CPDPRG2 waltz16
NUC2 1H
PCPD2 80.00 usec
PL12 17.43 dB
PL13 18.43 dB
PL2 0.00 dB
SFO2 500.3920016 MHz

F2 - Processing parameters
S1 32768
SF 125.8231509 MHz
WDW EM
SSB 0
LB 1.00 Hz
GB 0
PC 1.40
    
```

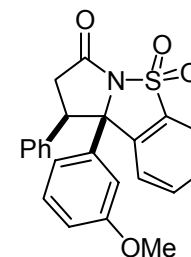

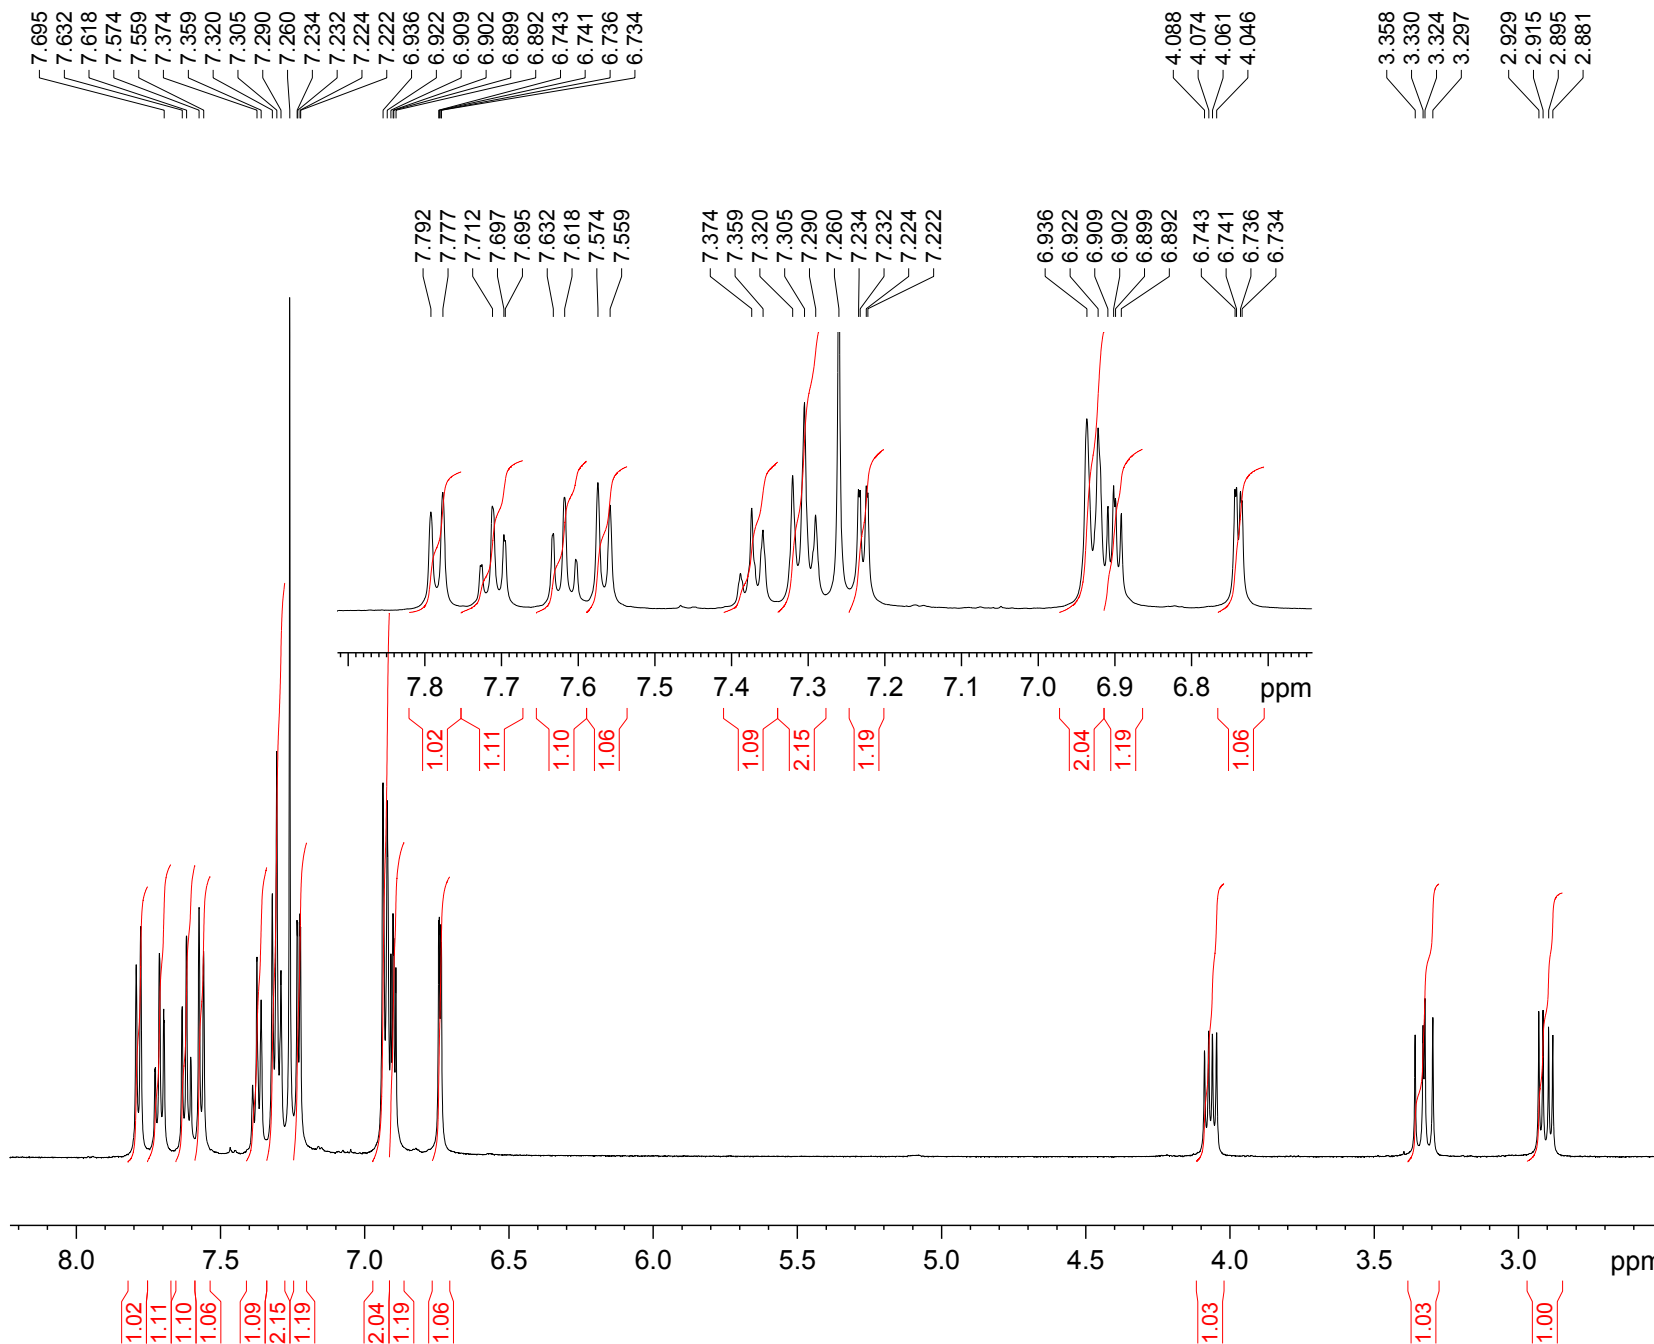

```

Current Data Parameters
NAME MR137-1cis
EXPNO 1
PROCNO 1

F2 - Acquisition Parameters
Date_ 20071205
Time_ 11.54
INSTRUM spect
PROBHD 5 mm PABBO BB-
PULPROG zg30
TD 65536
SOLVENT CDCl3
NS 16
DS 2
SWH 7002.801 Hz
FIDRES 0.106854 Hz
AQ 4.6793203 sec
RG 575
DW 71.400 usec
DE 6.50 usec
TE 295.7 K
D1 1.00000000 sec
TDO 1

===== CHANNEL f1 =====
NUC1 1H
P1 10.76 usec
PL1 0.00 dB
SFO1 500.3932525 MHz

F2 - Processing parameters
SI 32768
SF 500.3900160 MHz
WDW EM
SSB 0
LB 0.30 Hz
GB 0
PC 1.00
    
```

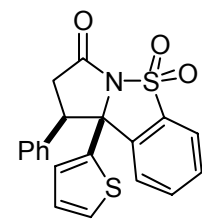

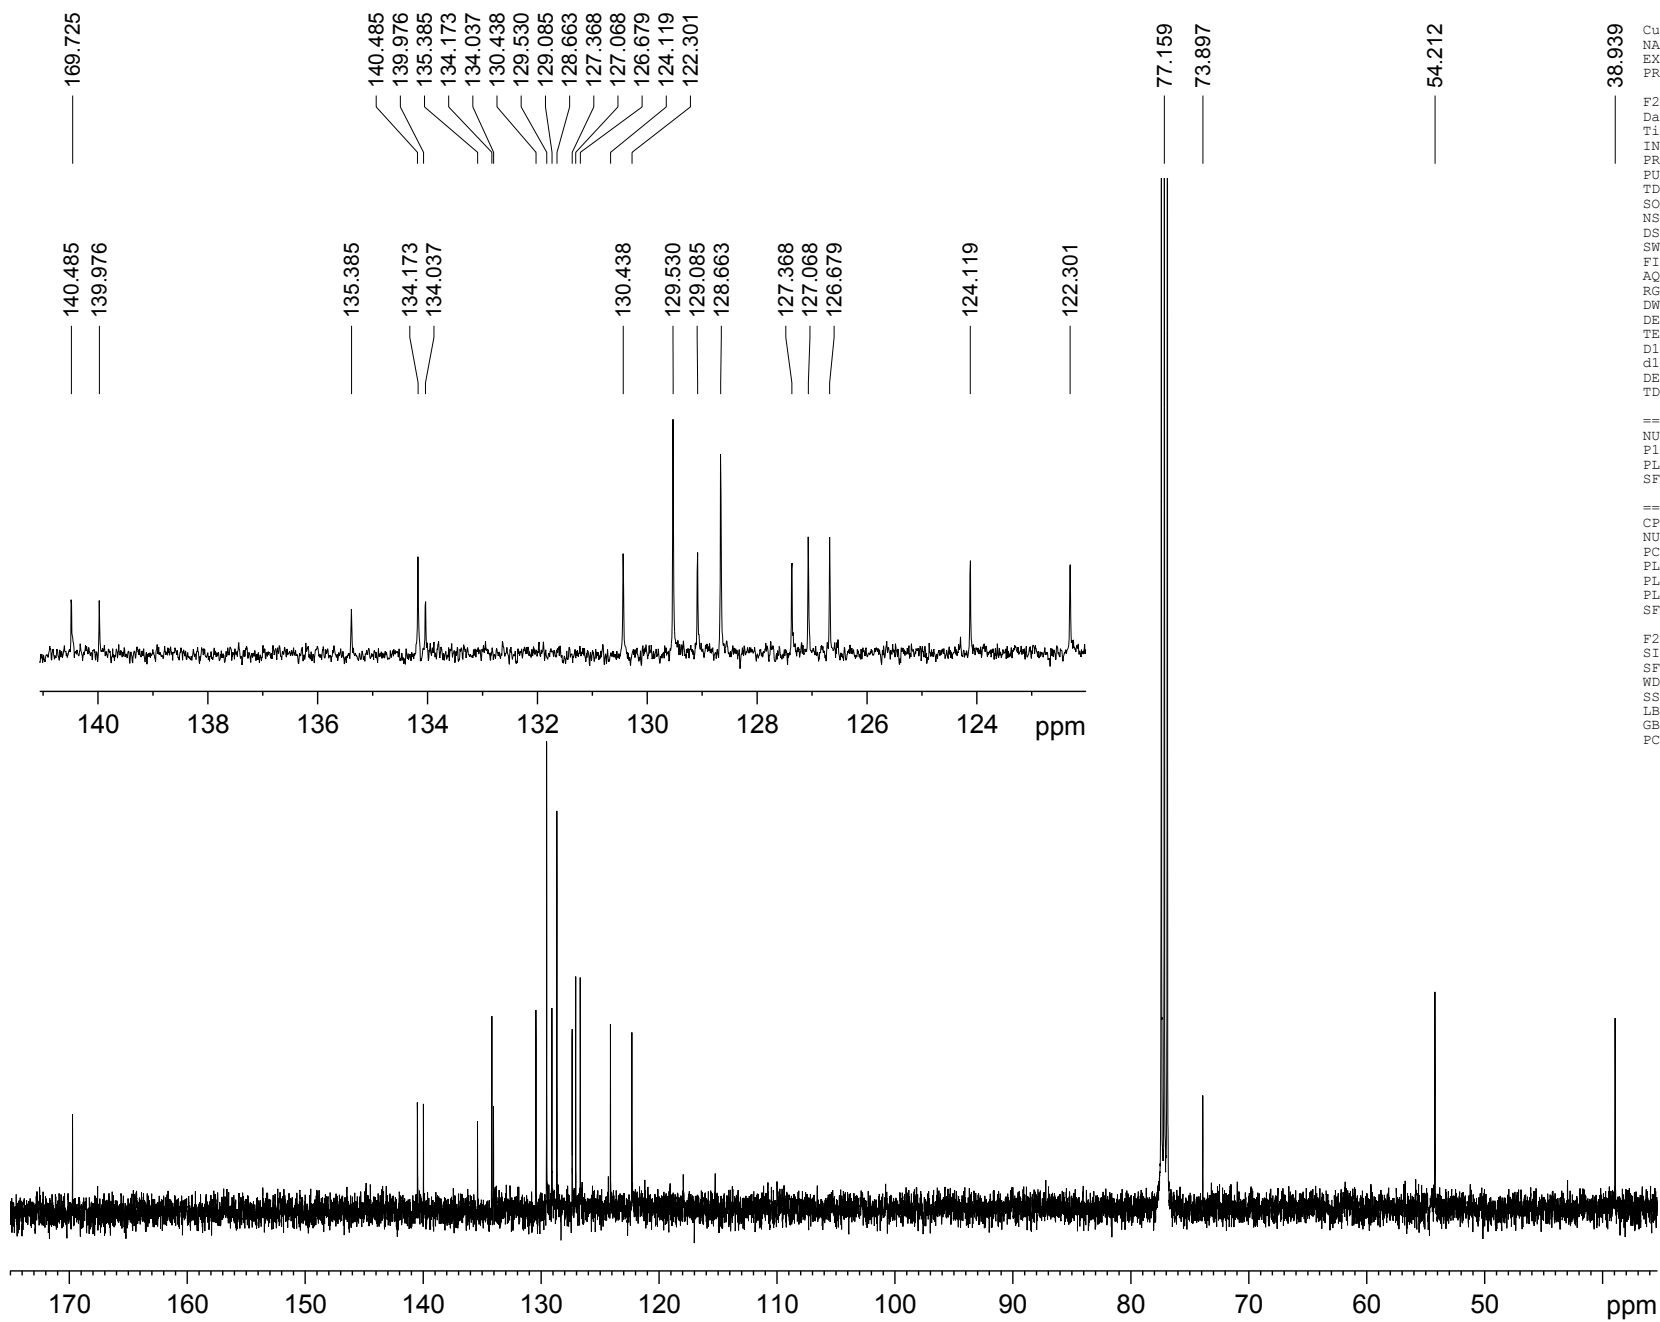

```

Current Data Parameters
NAME          MRI137-1cis
EXPNO         2
PROCNO        1

F2 - Acquisition Parameters
Date_         20071205
Time_         11.59
INSTRUM       spect
PROBHD        5 mm PABBO BB-
PULPROG       zgpg30
TD            65536
SOLVENT       CDCl3
NS            155
DS            4
SWH           29761.904 Hz
FIDRES        0.454131 Hz
AQ            1.1010548 sec
RG            456
DW            16.800 usec
DE            6.50 usec
TE            297.0 K
D1            2.00000000 sec
d11           0.03000000 sec
DELTA         1.89999998 sec
TD0           1

===== CHANNEL f1 =====
NUC1          13C
P1            7.50 usec
PL1           1.00 dB
SFO1          125.8357479 MHz

===== CHANNEL f2 =====
CPDPRG2       waltz16
NUC2          1H
PCPD2         80.00 usec
PL12          17.43 dB
PL13          19.43 dB
PL2           0.00 dB
SFO2          500.3920016 MHz

F2 - Processing parameters
SI            32768
SF            125.8231516 MHz
WDW           EM
SSB           0
LB            1.00 Hz
GB            0
PC            1.40

```

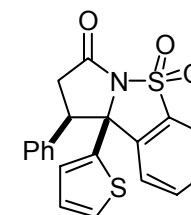

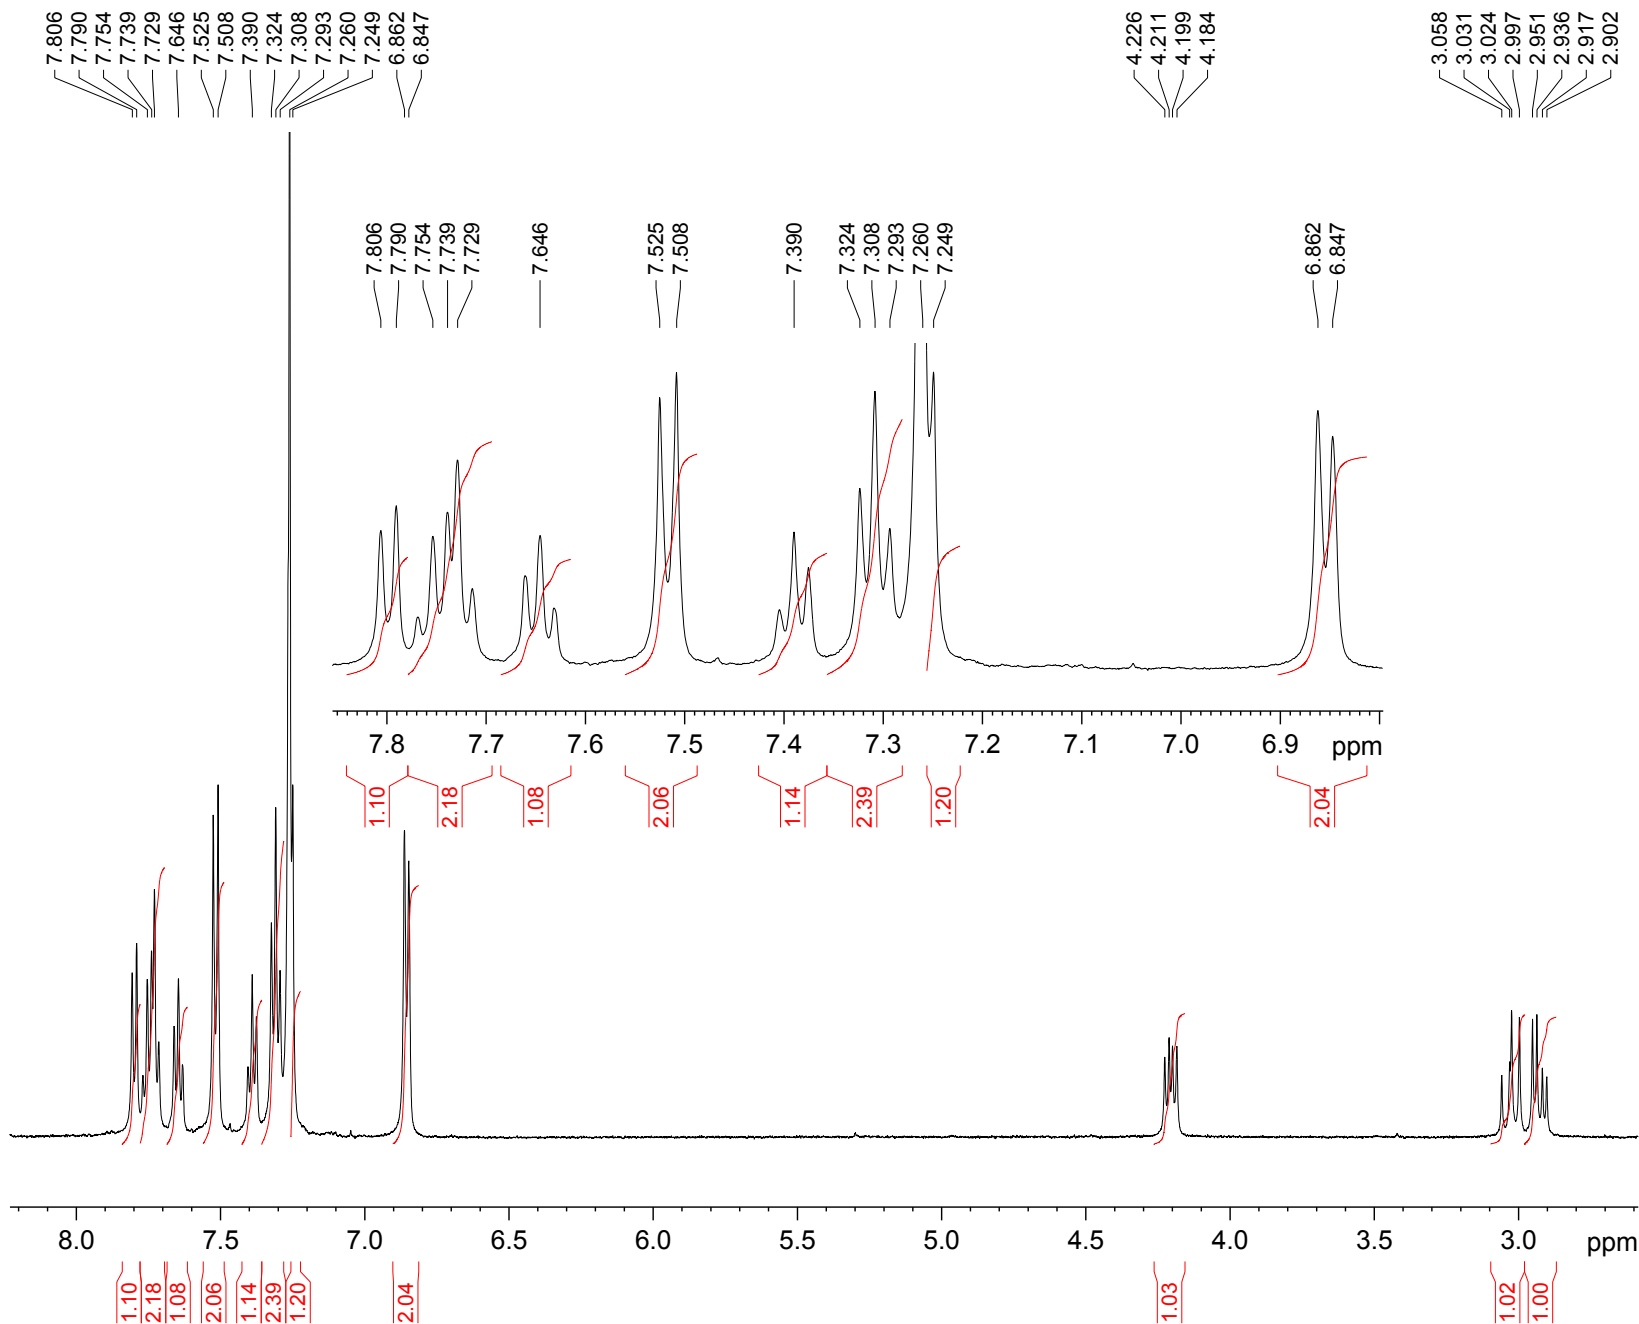

```

Current Data Parameters
NAME          MR140-ltrans
EXPNO        1
PROCNO       1

F2 - Acquisition Parameters
Date_        20071205
Time         13.28
INSTRUM     spect
PROBHD      5 mm PABBO BB-
PULPROG     zg30
TD          65536
SOLVENT     CDCl3
NS          16
DS          2
SWH         7002.801 Hz
FIDRES     0.106854 Hz
AQ         4.6793203 sec
RG         1150
RC         1150
DW         71.400 usec
DE         6.50 usec
TE         296.0 K
D1         1.00000000 sec
TD0        1

===== CHANNEL f1 =====
NUC1        1H
P1         10.76 usec
PL1        0.00 dB
SFO1       500.3932525 MHz

F2 - Processing parameters
SI         32768
SF         500.3900160 MHz
WDW        EM
SSB        0
LB         0.30 Hz
GB         0
PC         1.00
    
```

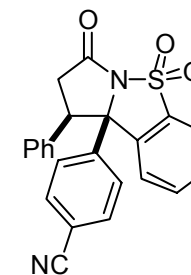

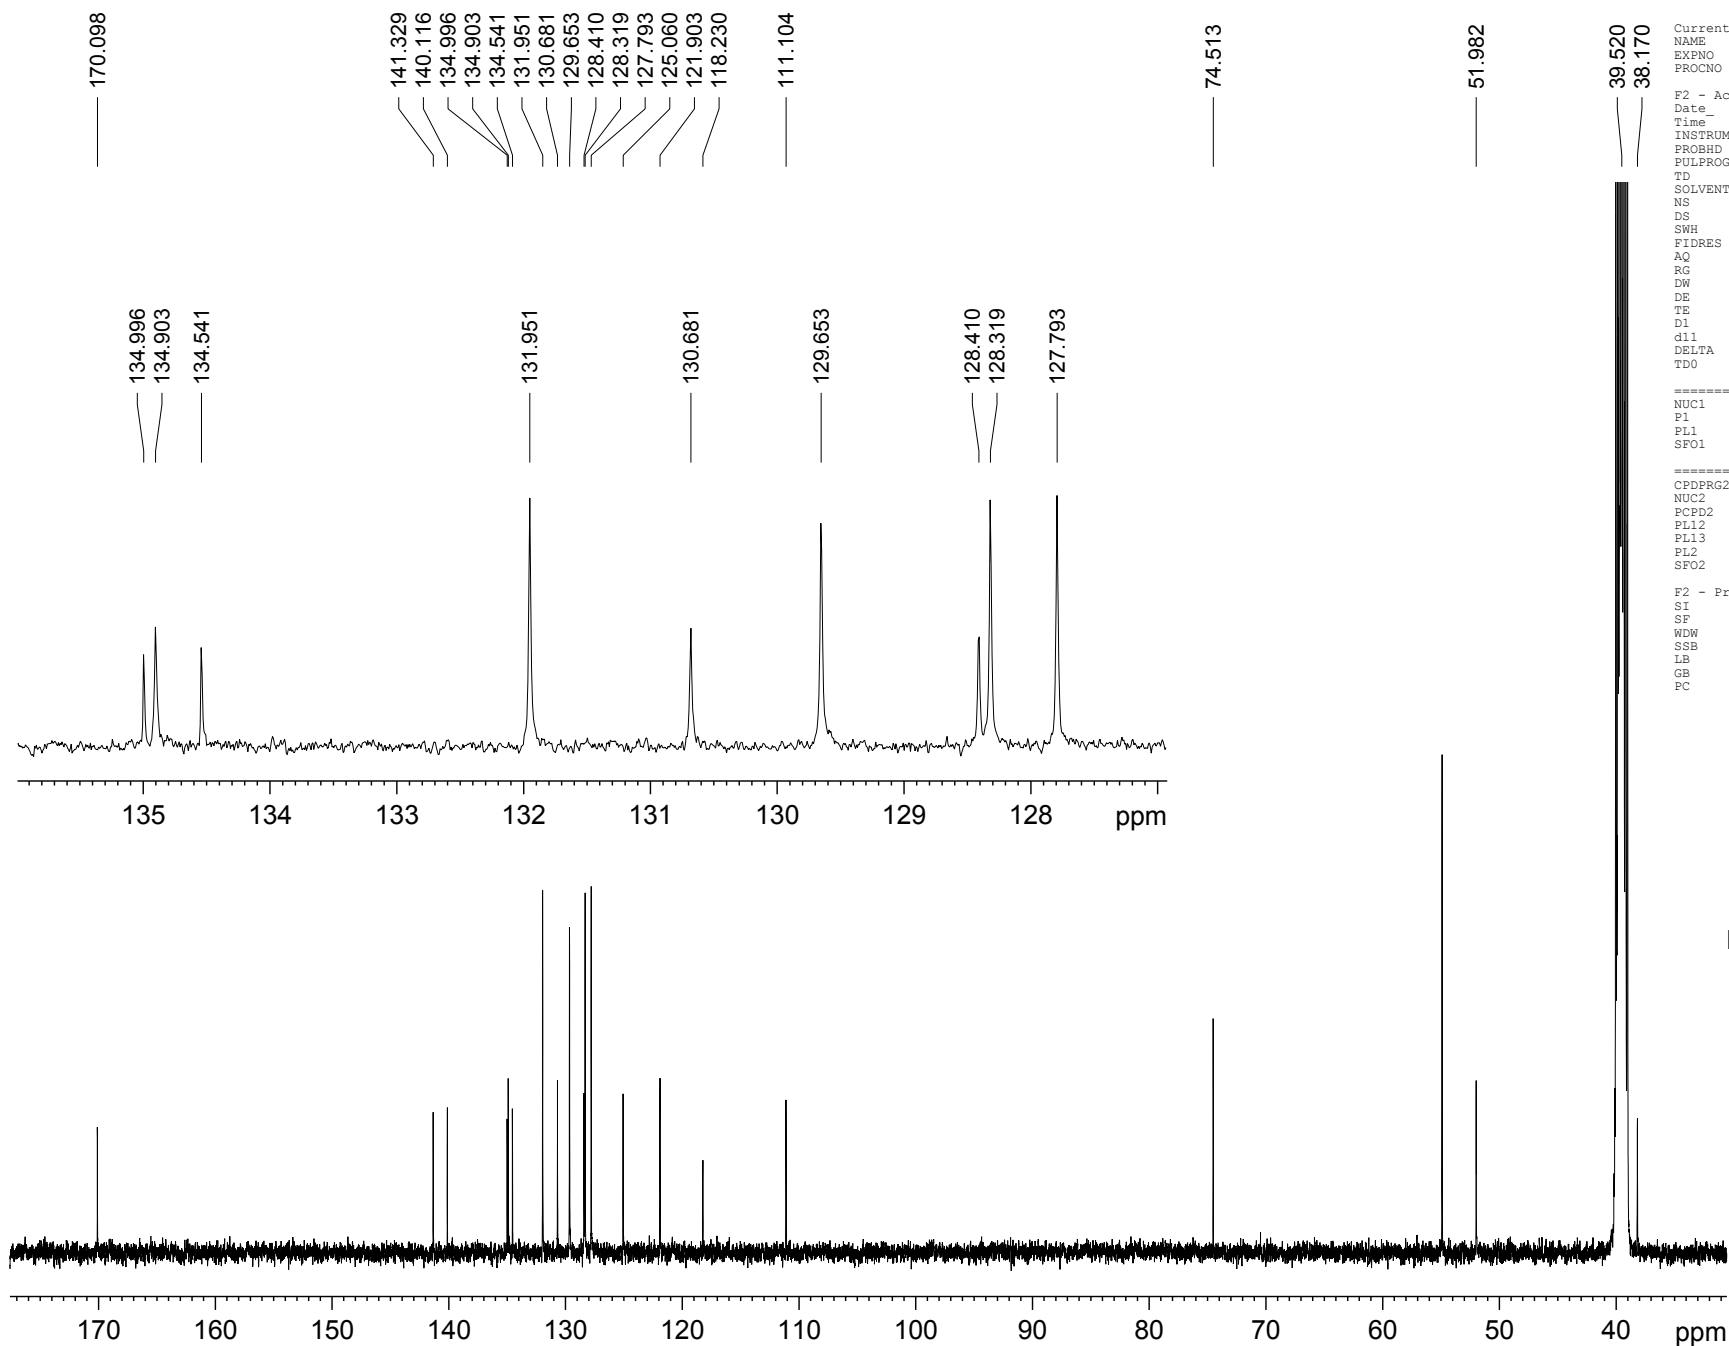

```

Current Data Parameters
NAME          MR140-2
EXPNO         4
PROCNO       1

F2 - Acquisition Parameters
Date_         20080319
Time         23.10
INSTRUM      spect
PROBHD       5 mm PABBO BB-
PULPROG      zgpg30
TD           65536
SOLVENT      DMSO
NS           9216
DS           4
SWH          29761.904 Hz
FIDRES       0.454131 Hz
AQ           1.1010548 sec
RG           724
DW           16.800 usec
DE           6.50 usec
TE           296.3 K
D1           2.00000000 sec
d11          0.03000000 sec
DELTA        1.89999998 sec
TDO          1

===== CHANNEL f1 =====
NUC1          13C
P1            7.50 usec
PL1           1.00 dB
SFO1         125.8357479 MHz

===== CHANNEL f2 =====
CPDPRG2      waltz16
NUC2         1H
PCPD2        80.00 usec
PL12         17.43 dB
PL13         18.43 dB
PL2          0.00 dB
SFO2         500.3920016 MHz

F2 - Processing parameters
SI            32768
SF           125.8232266 MHz
WDW           EM
SSB           0
LB            1.00 Hz
GB            0
PC            1.40

```

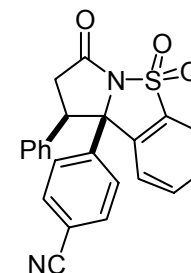



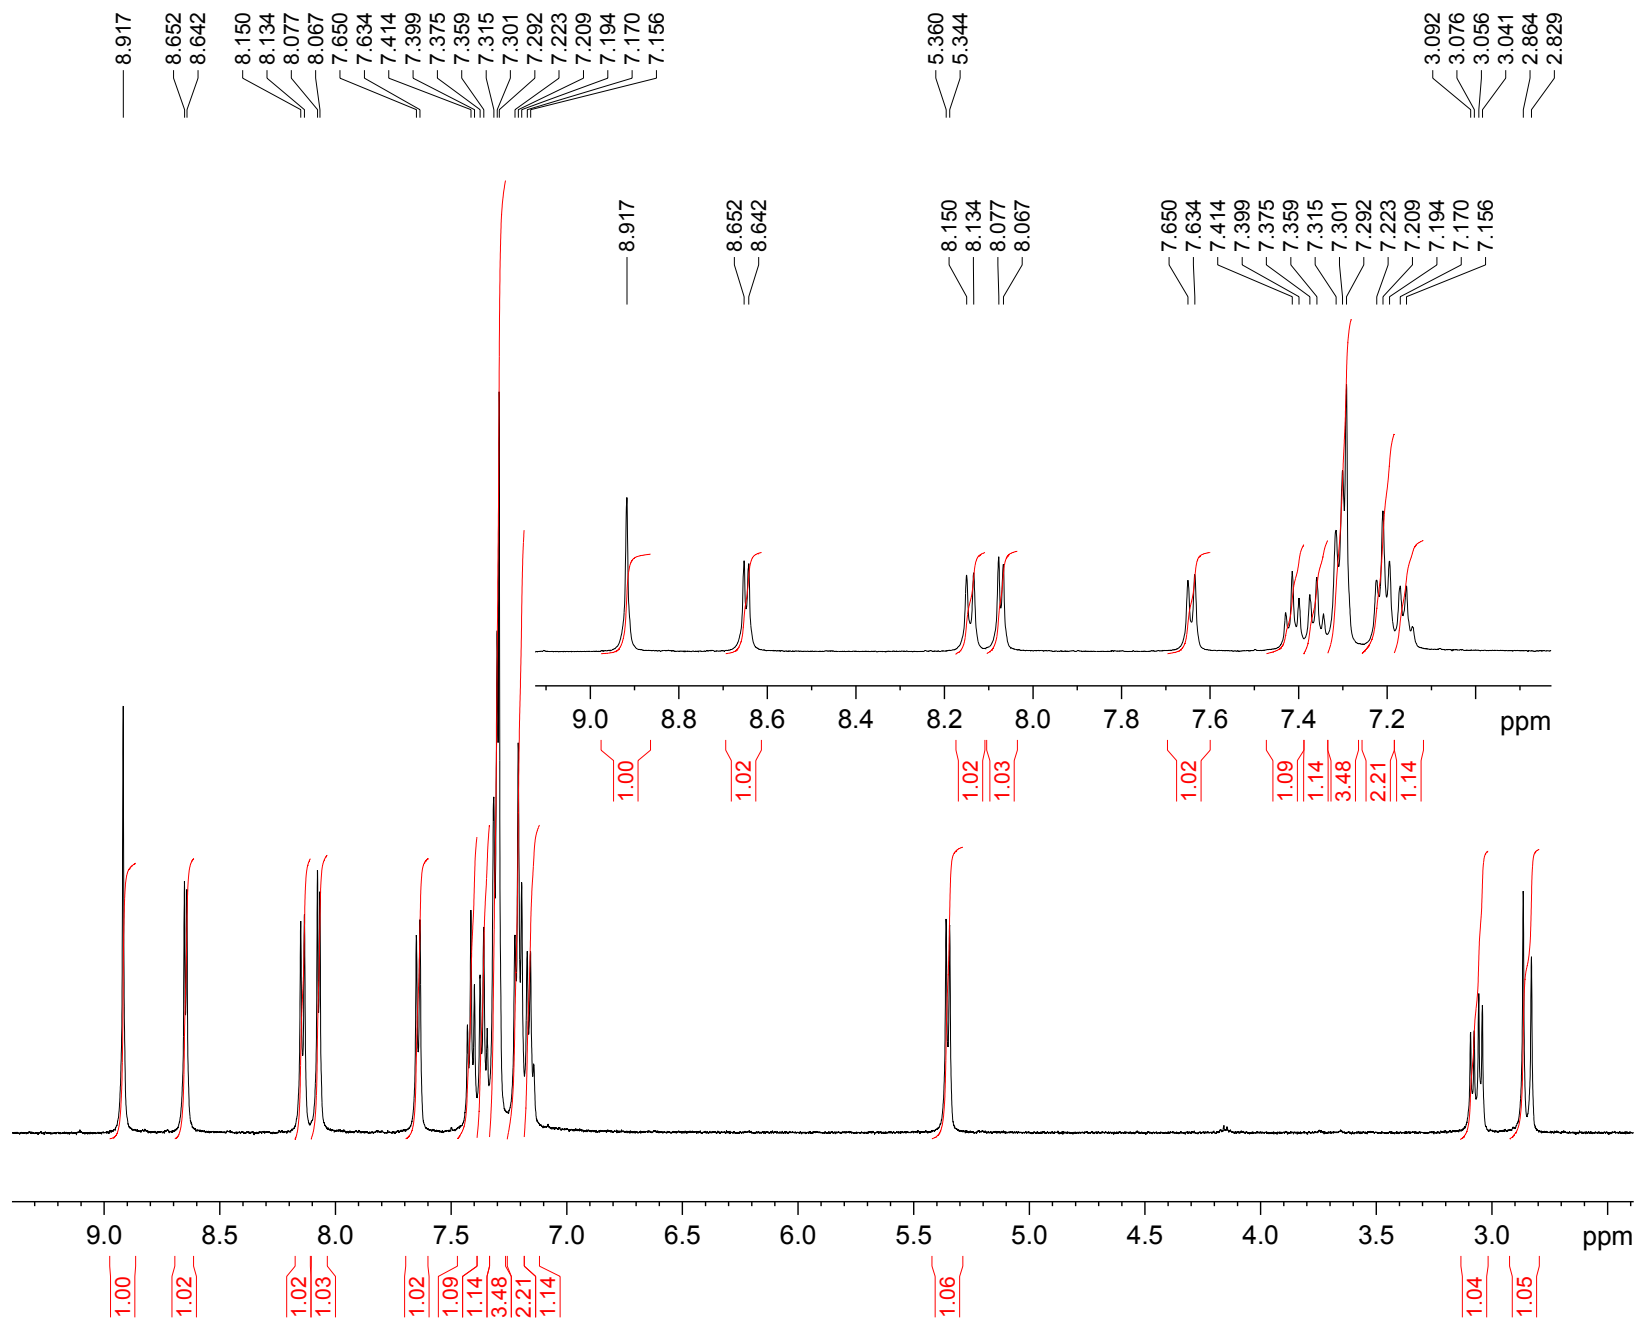

```

Current Data Parameters
NAME                MR148-loben
EXPNO               1
PROCNO             1

F2 - Acquisition Parameters
Date_              20071215
Time_              8.56
INSTRUM            spect
PROBHD             5 mm PABBO BB-
PULPROG            zg30
TD                 65536
SOLVENT            CDCl3
NS                 16
DS                 2
SWH                7002.801 Hz
FIDRES            0.106854 Hz
AQ                4.6793203 sec
RG                1030
DW                71.400 usec
DE                6.50 usec
TE                297.8 K
D1                1.0000000 sec
TD0               1

===== CHANNEL f1 =====
NUC1               1H
P1                 10.76 usec
PL1                0.00 dB
SFO1               500.3932525 MHz

F2 - Processing parameters
SI                 32768
SF                 500.3900000 MHz
WDW                EM
SSB                0
LB                 0.30 Hz
GB                 0
PC                 1.00

```

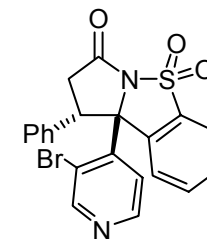

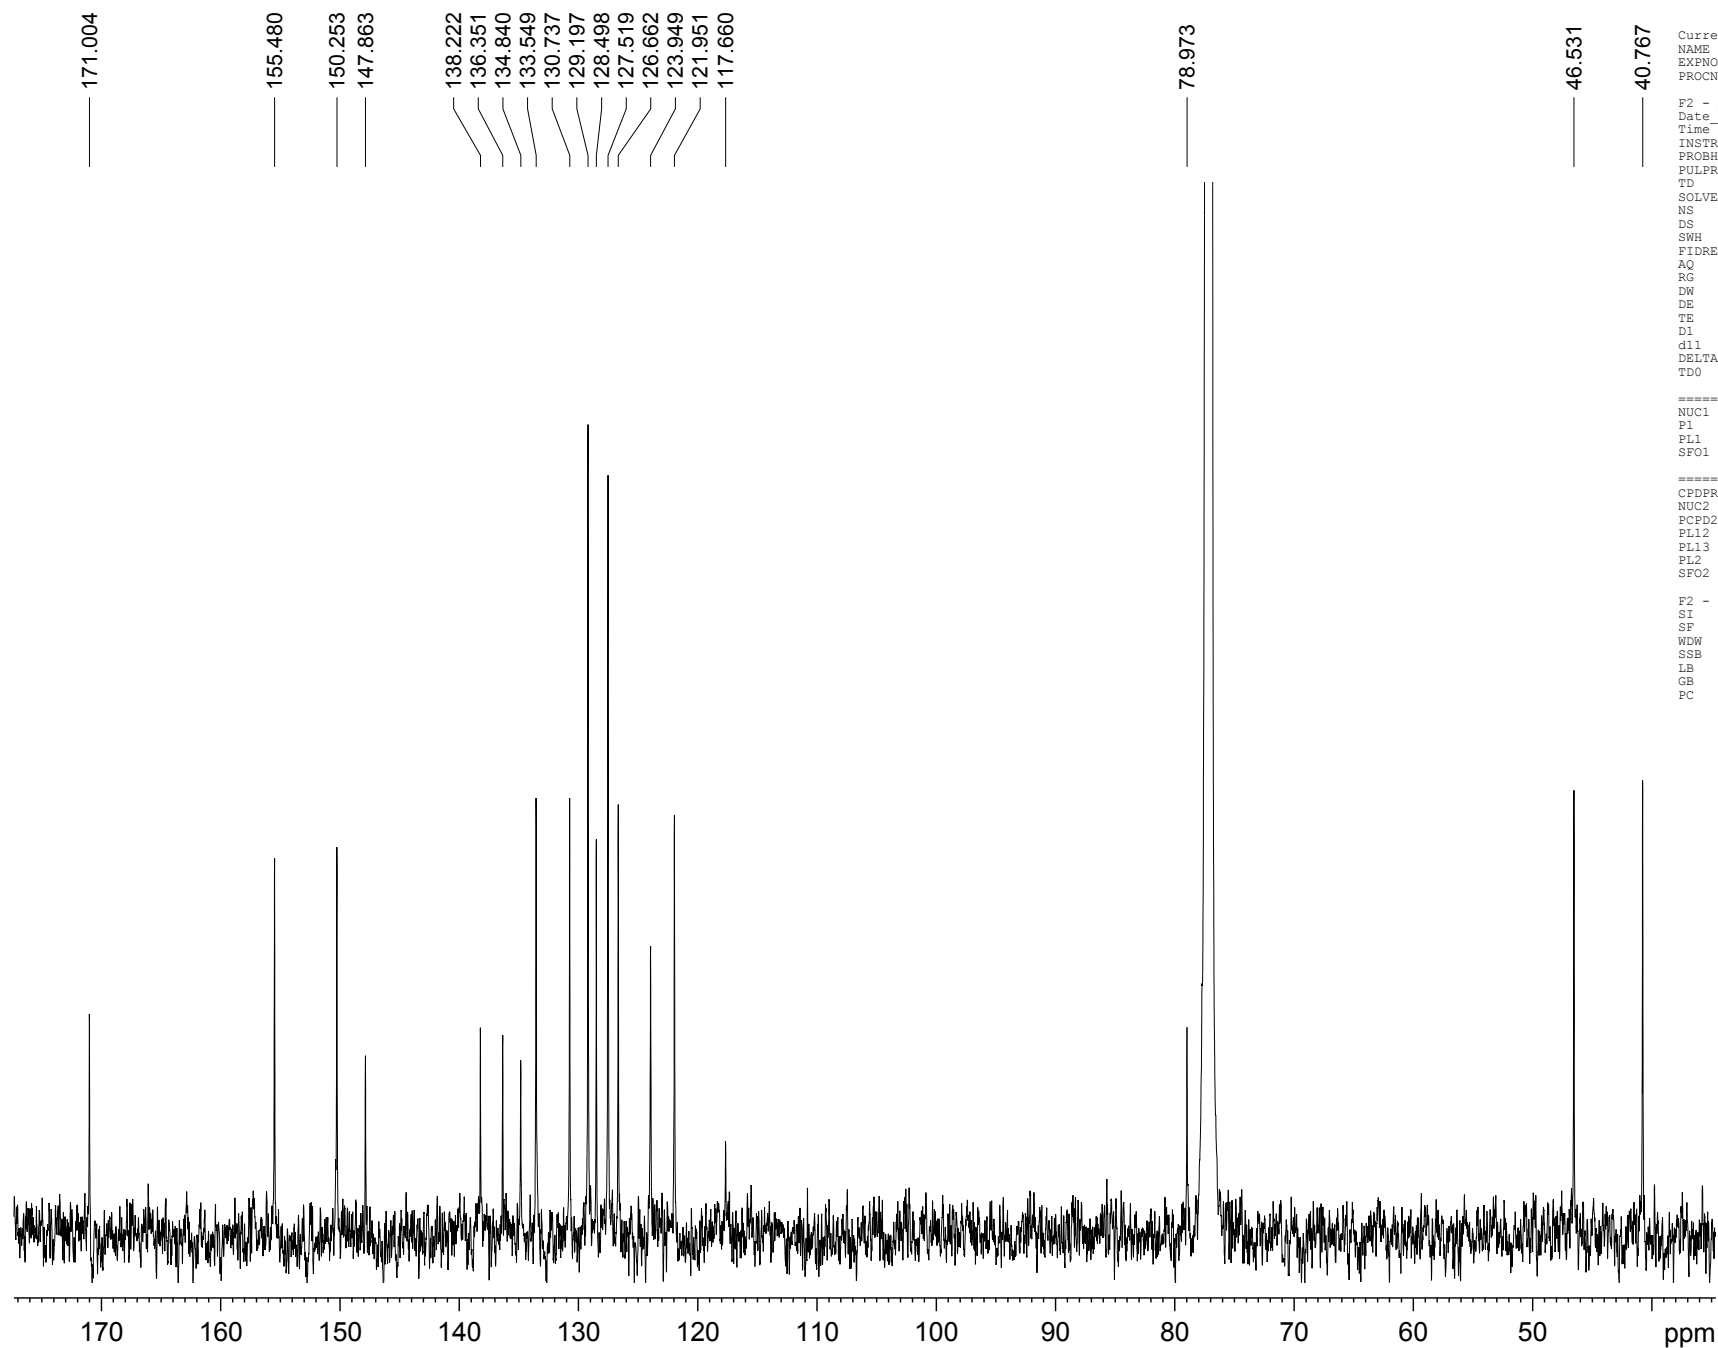

```
Current Data Parameters
NAME          MR148-loben
EXPNO         4
PROCNO        1

F2 - Acquisition Parameters
Date_         20080927
Time          23.32
INSTRUM       spect
PROBHD        5 mm PABBO BB-
PULPROG       zgpg30
TD            65536
SOLVENT       CDCl3
NS            1347
DS            4
SWH           29761.904 Hz
FIDRES        0.454131 Hz
AQ            1.1010548 sec
RG            912
DW            16.800 usec
DE            6.50 usec
TE            298.9 K
D1            2.00000000 sec
d11           0.03000000 sec
DELTA         1.89999998 sec
TDO           1

===== CHANNEL f1 =====
NUC1           13C
P1             7.50 usec
PL1            1.00 dB
SFO1           125.8357479 MHz

===== CHANNEL f2 =====
CPDPRG2       waltz16
NUC2           1H
PCPD2         80.00 usec
PL12          17.43 dB
PL13          18.43 dB
PL2           0.00 dB
SFO2           500.3920016 MHz

F2 - Processing parameters
SI             32768
SF            125.8231500 MHz
WDW            EM
SSB            0
LB             5.00 Hz
GB             0
PC             1.40
```

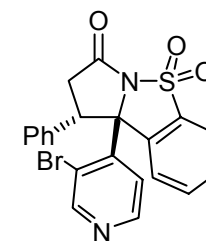

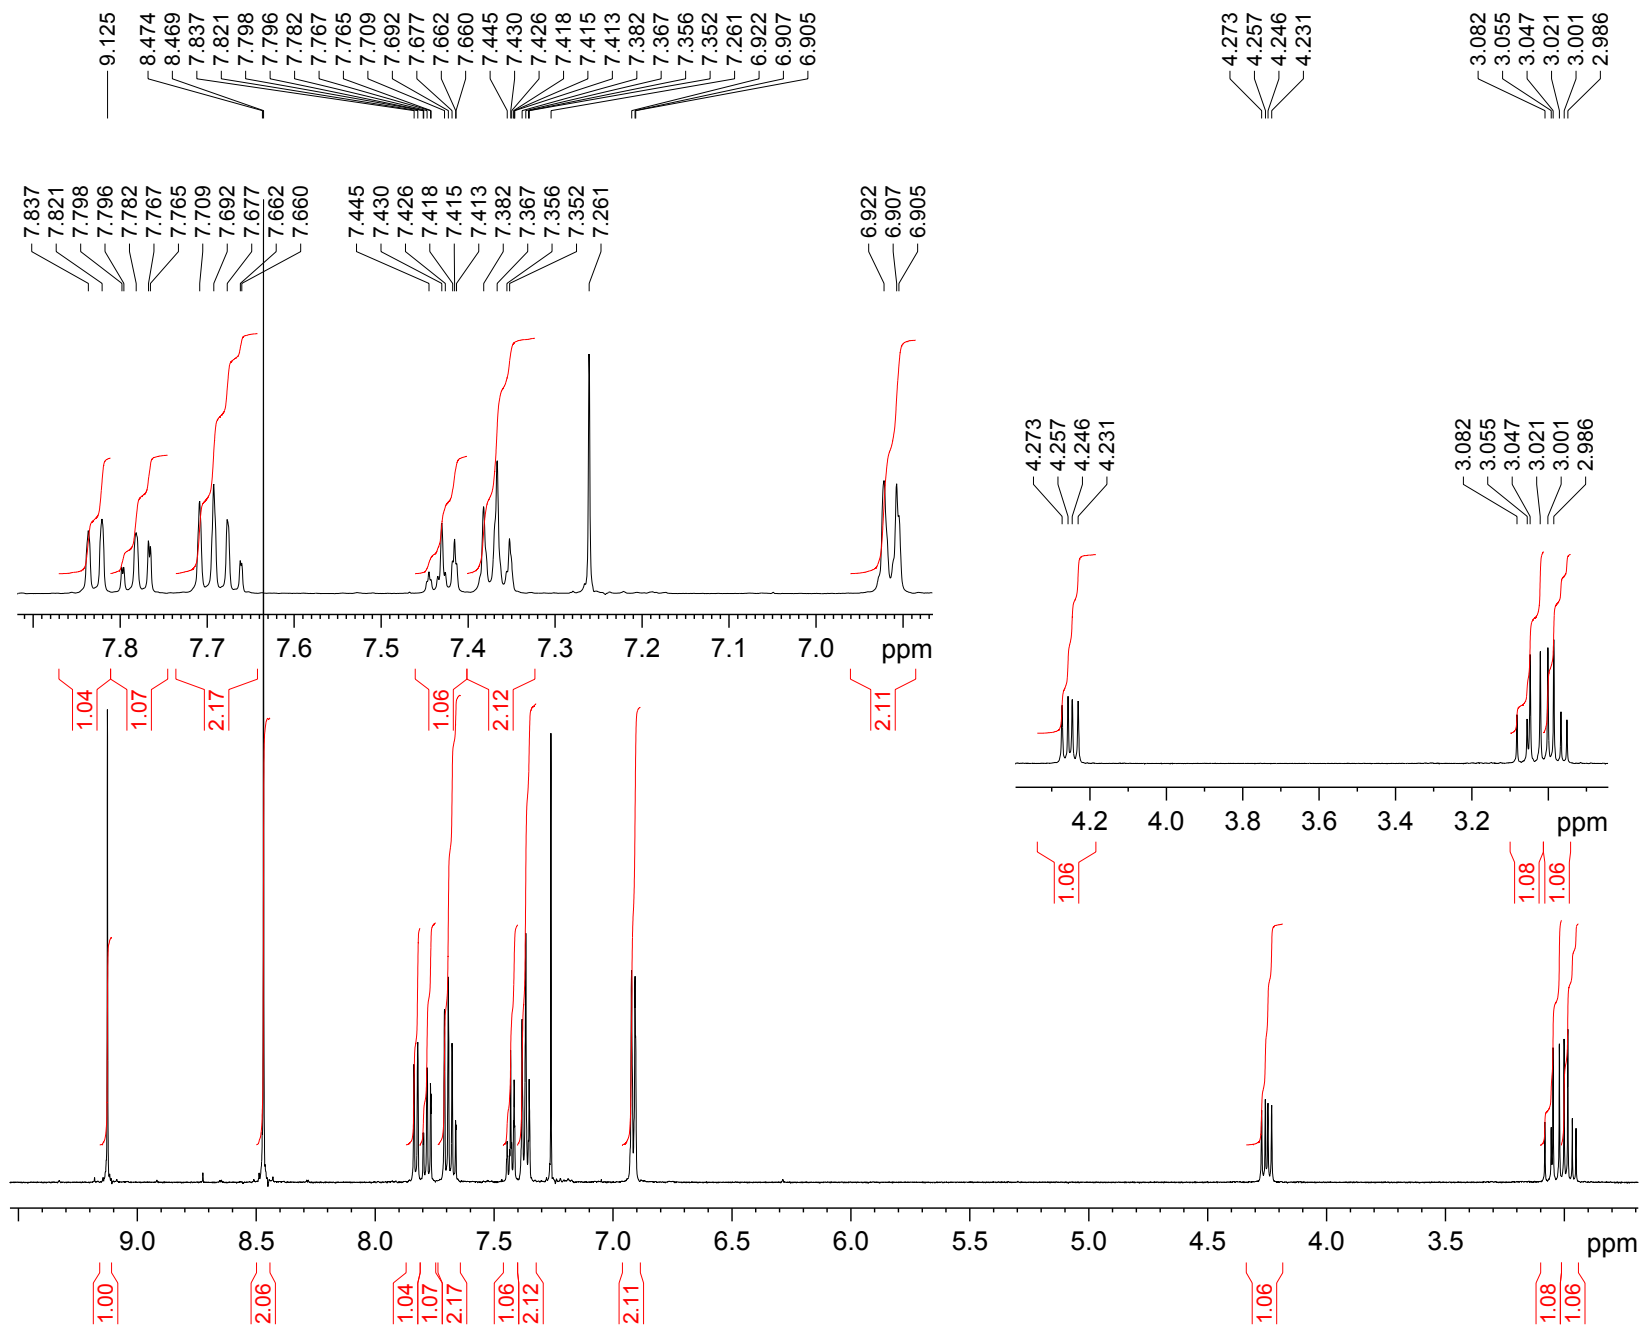

```

Current Data Parameters
NAME                MR217-2
EXPNO                3
PROCNO              1

F2 - Acquisition Parameters
Date_                20080723
Time                 10.32
INSTRUM              spect
PROBHD               5 mm PABBO BB-
PULPROG              zg30
TD                   65536
SOLVENT              CDCl3
NS                   16
DS                   2
SWH                  7002.801 Hz
FIDRES               0.106854 Hz
AQ                   4.6793203 sec
RG                   512
DW                   71.400 usec
DE                   6.50 usec
TE                   298.2 K
D1                   1.00000000 sec
TD0                  1

===== CHANNEL f1 =====
NUC1                 1H
P1                   10.76 usec
PL1                  0.00 dB
SFO1                 500.3932525 MHz

F2 - Processing parameters
SI                   32768
SF                   500.3900160 MHz
WDW                  EM
SSB                  0
LB                   0.30 Hz
GB                   0
PC                   1.00

```

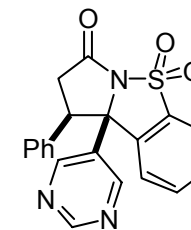

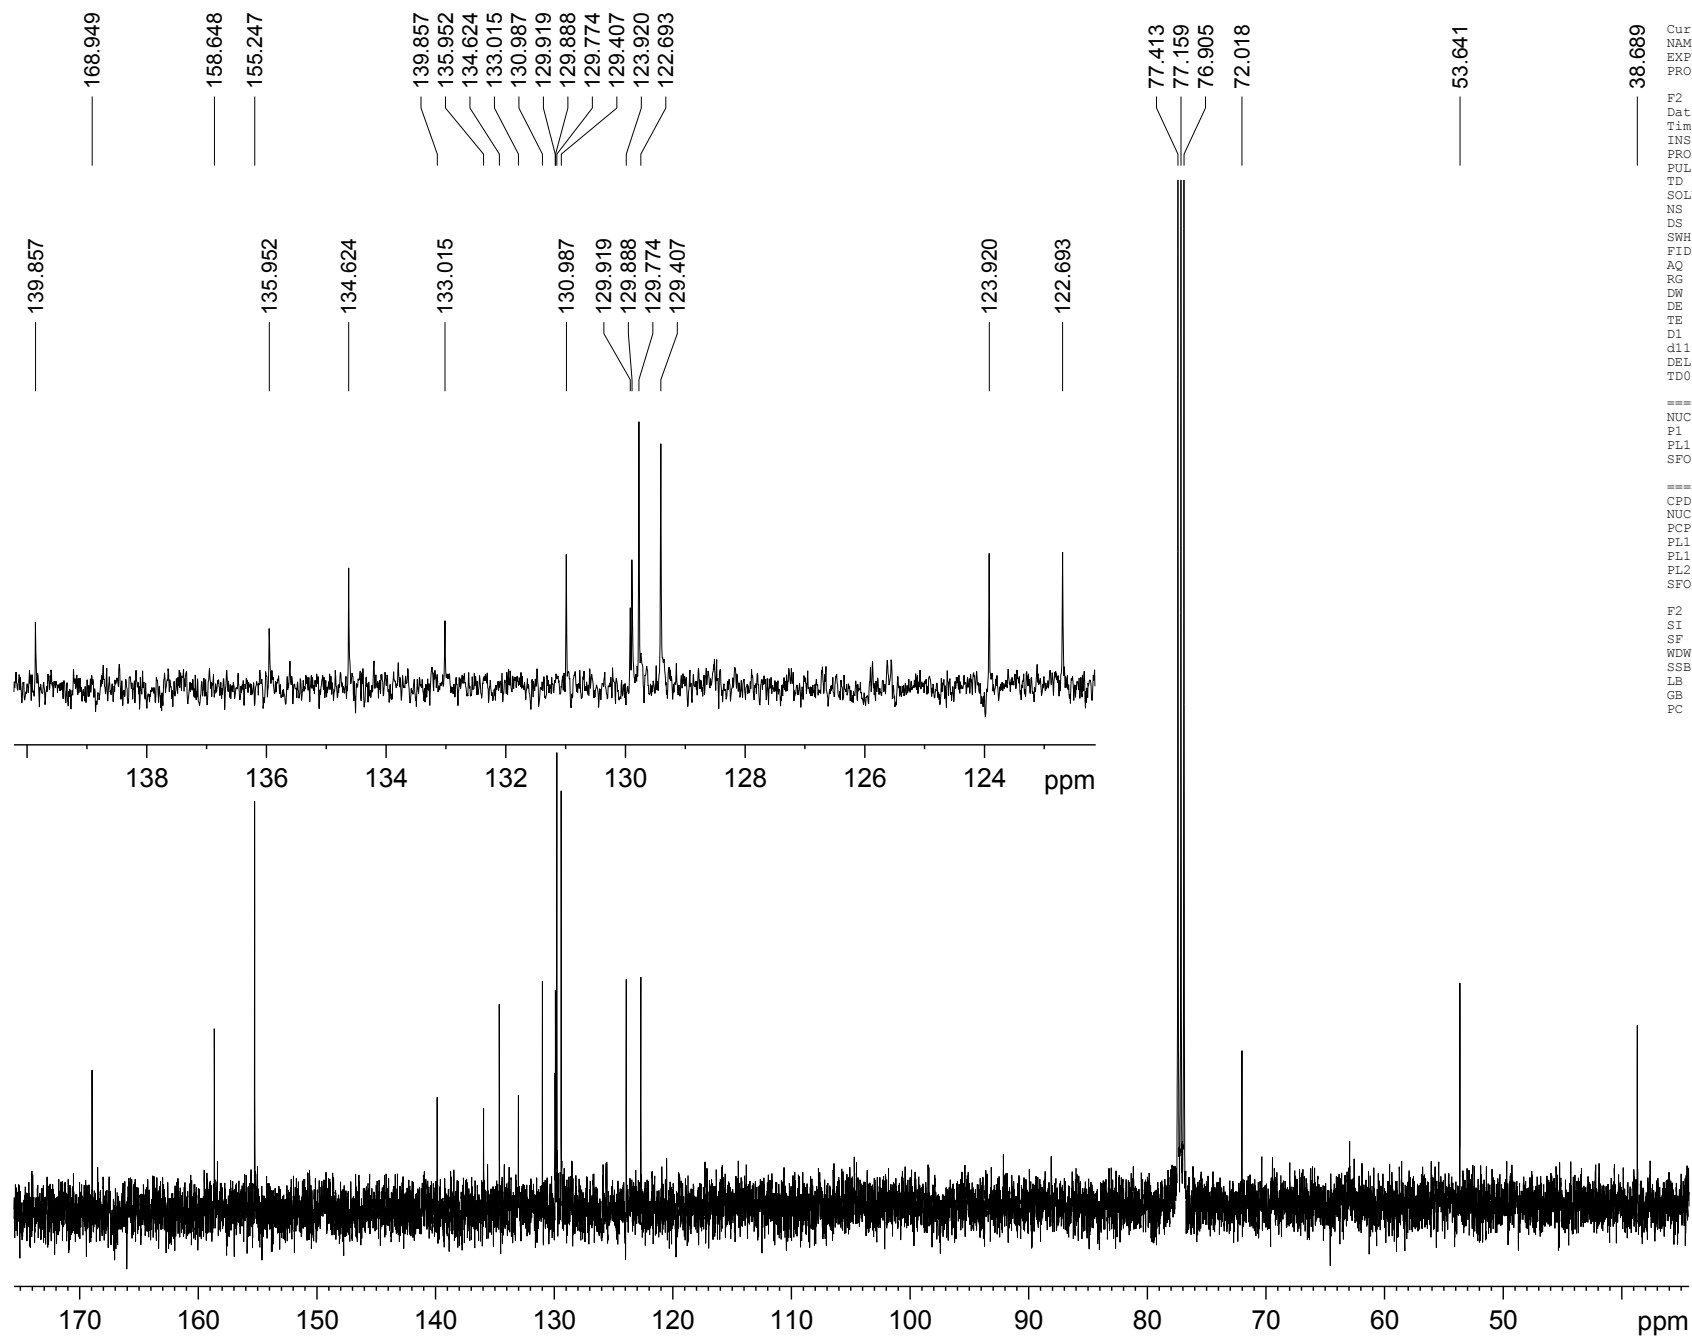

```

Current Data Parameters
NAME MR217-2
EXPNO 4
PROCNO 1

F2 - Acquisition Parameters
Date_ 20080723
Time_ 10.34
INSTRUM spect
PROBHD 5 mm PABBO BB-
PULPROG zgpg30
TD 65536
SOLVENT CDCl3
NS 106
DS 4
SWH 29761.904 Hz
FIDRES 0.454131 Hz
AQ 1.1010548 sec
RG 1030
DW 16.800 usec
DE 6.50 usec
TE 298.6 K
D1 2.0000000 sec
d11 0.0300000 sec
DELTA 1.8999999 sec
TD0 1

===== CHANNEL f1 =====
NUC1 13C
P1 7.50 usec
PL1 1.00 dB
SFO1 125.8357479 MHz

===== CHANNEL f2 =====
CPDPRG2 waltz16
NUC2 1H
PCPD2 80.00 usec
PL12 17.43 dB
PL13 18.43 dB
PL2 0.00 dB
SFO2 500.3920016 MHz

F2 - Processing parameters
SI 32768
SF 125.8231500 MHz
WDW EM
SSB 0
LB 1.00 Hz
GB 0
PC 1.40

```

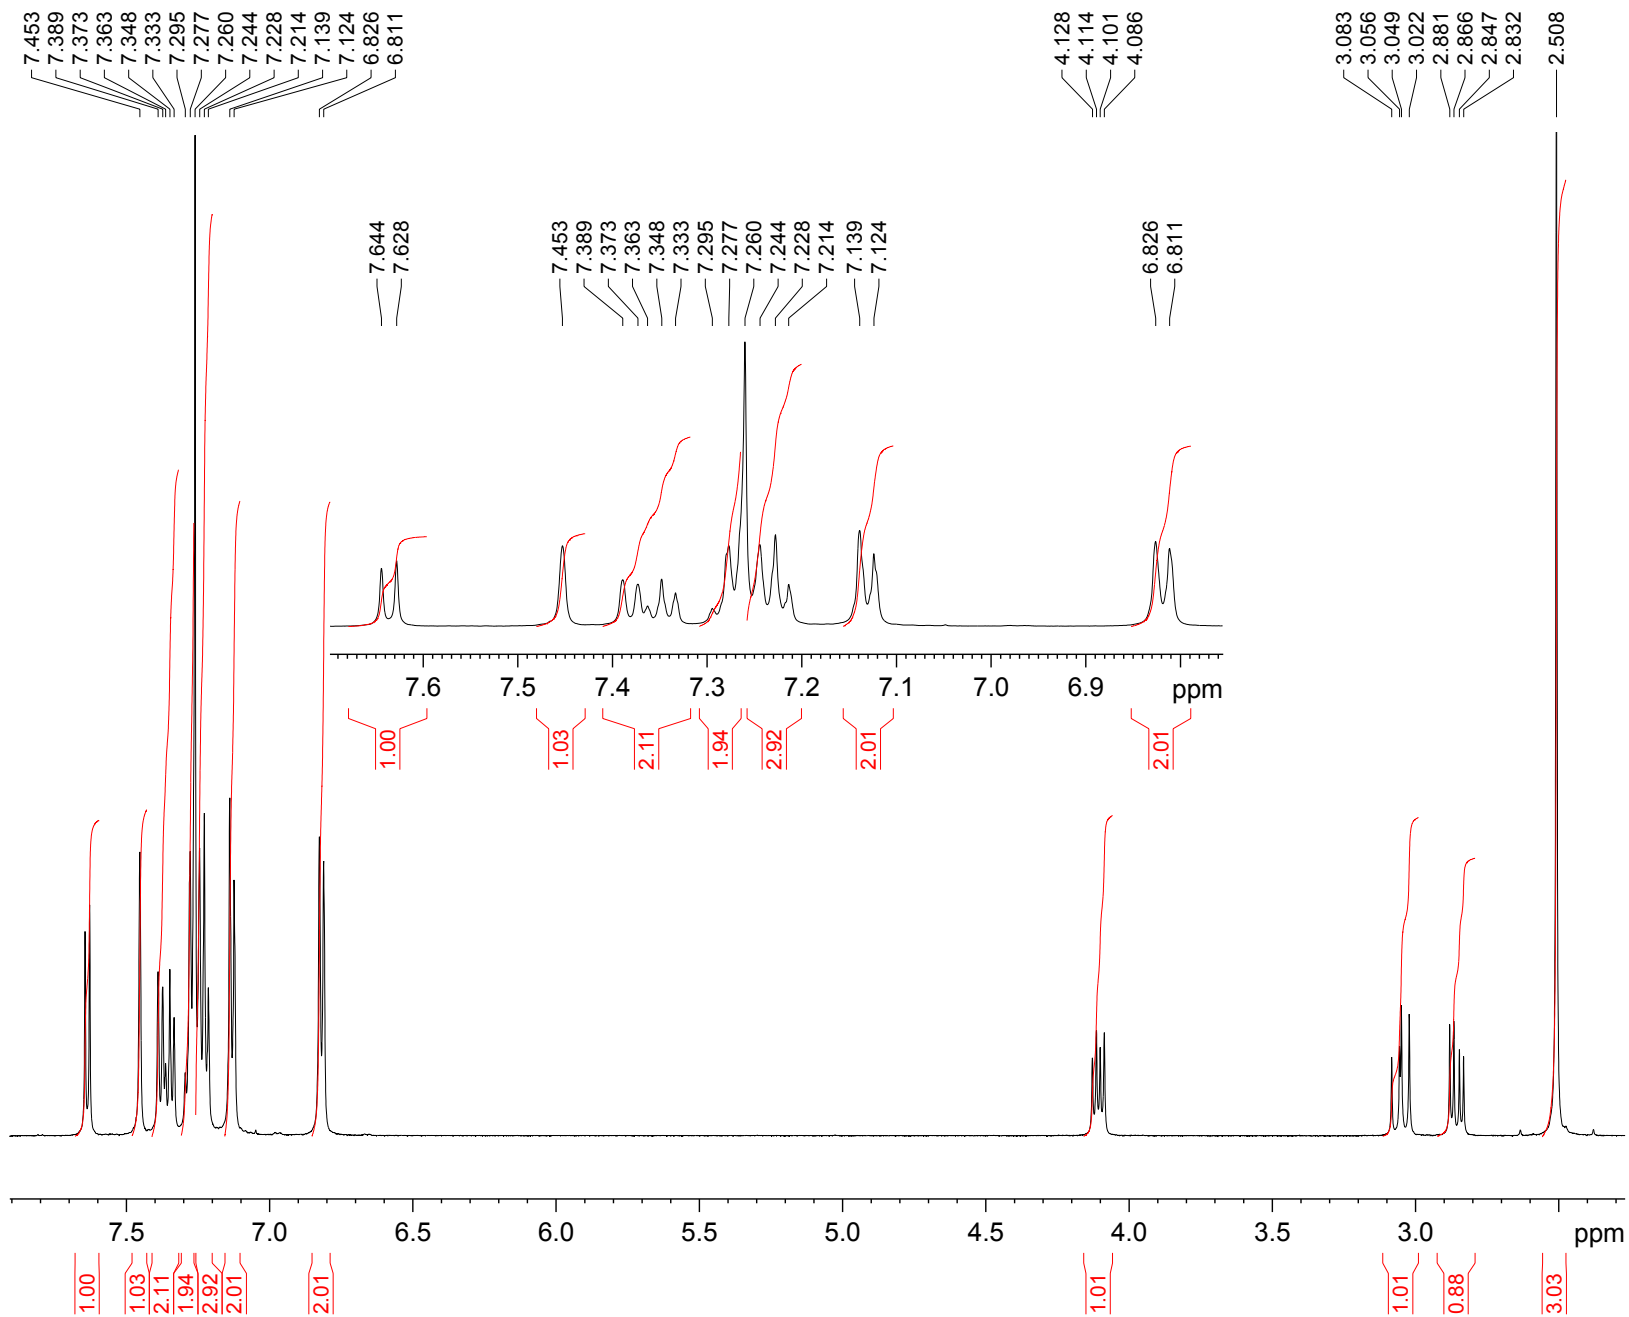

```

Current Data Parameters
NAME MR141-1cis
EXPNO 1
PROCNO 1

F2 - Acquisition Parameters
Date_ 20071205
Time 12.08
INSTRUM spect
PROBHD 5 mm PABBO BB-
PULPROG zg30
TD 65536
SOLVENT CDCl3
NS 16
DS 2
SWH 7002.801 Hz
FIDRES 0.106854 Hz
AQ 4.6793203 sec
RG 575
DW 71.400 usec
DE 6.50 usec
TE 296.1 K
D1 1.00000000 sec
TD0 1

===== CHANNEL f1 =====
NUC1 1H
P1 10.76 usec
PL1 0.00 dB
SFO1 500.3932525 MHz

F2 - Processing parameters
SI 32768
SF 500.3900161 MHz
WDW EM
SSB 0
LB 0.30 Hz
GB 0
PC 1.00
    
```

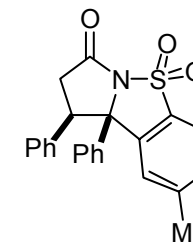

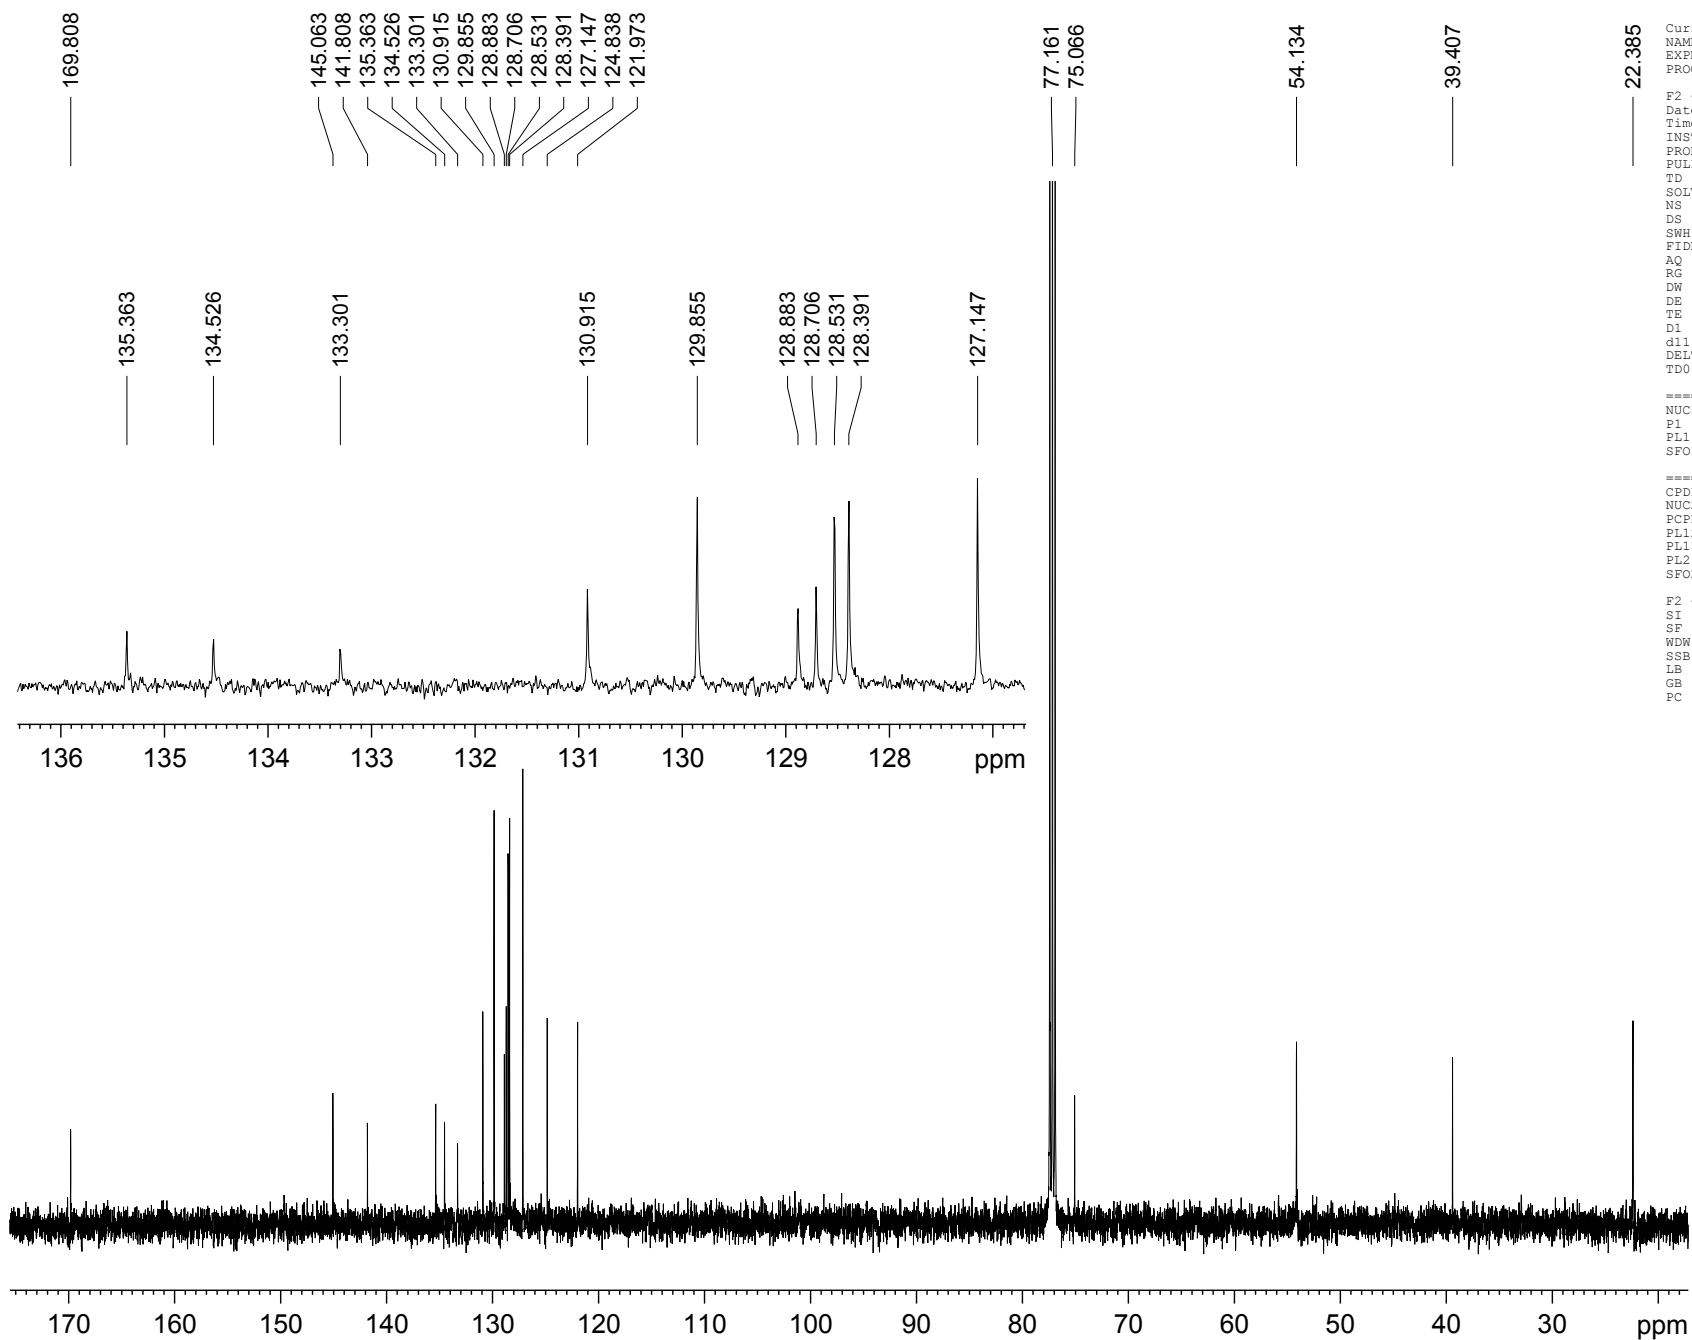

```

Current Data Parameters
NAME          MR141-1cis
EXPNO        2
PROCNO       1

F2 - Acquisition Parameters
Date_        20071205
Time         12.17
INSTRUM      spect
PROBHD       5 mm PABBO BB-
PULPROG      zgpg30
TD           65536
SOLVENT      CDC13
NS           168
DS           4
SWH          29761.904 Hz
FIDRES       0.454131 Hz
AQ           1.1010548 sec
RG           456
DW           16.800 usec
DE           6.50 usec
TE           297.3 K
D1           2.00000000 sec
d11          0.03000000 sec
DELTA       1.89999998 sec
TD0          1

===== CHANNEL f1 =====
NUC1         13C
P1           7.50 usec
PL1          1.00 dB
SFO1         125.8357479 MHz

===== CHANNEL f2 =====
CPDPRG2      waltz16
NUC2         1H
PCPD2        80.00 usec
PL12         17.43 dB
PL13         18.43 dB
PL2          0.00 dB
SFO2         500.3920016 MHz

F2 - Processing parameters
SI           32768
SF           125.8231508 MHz
WDW          EM
SSB          0
LB           1.00 Hz
GB           0
PC           1.40

```

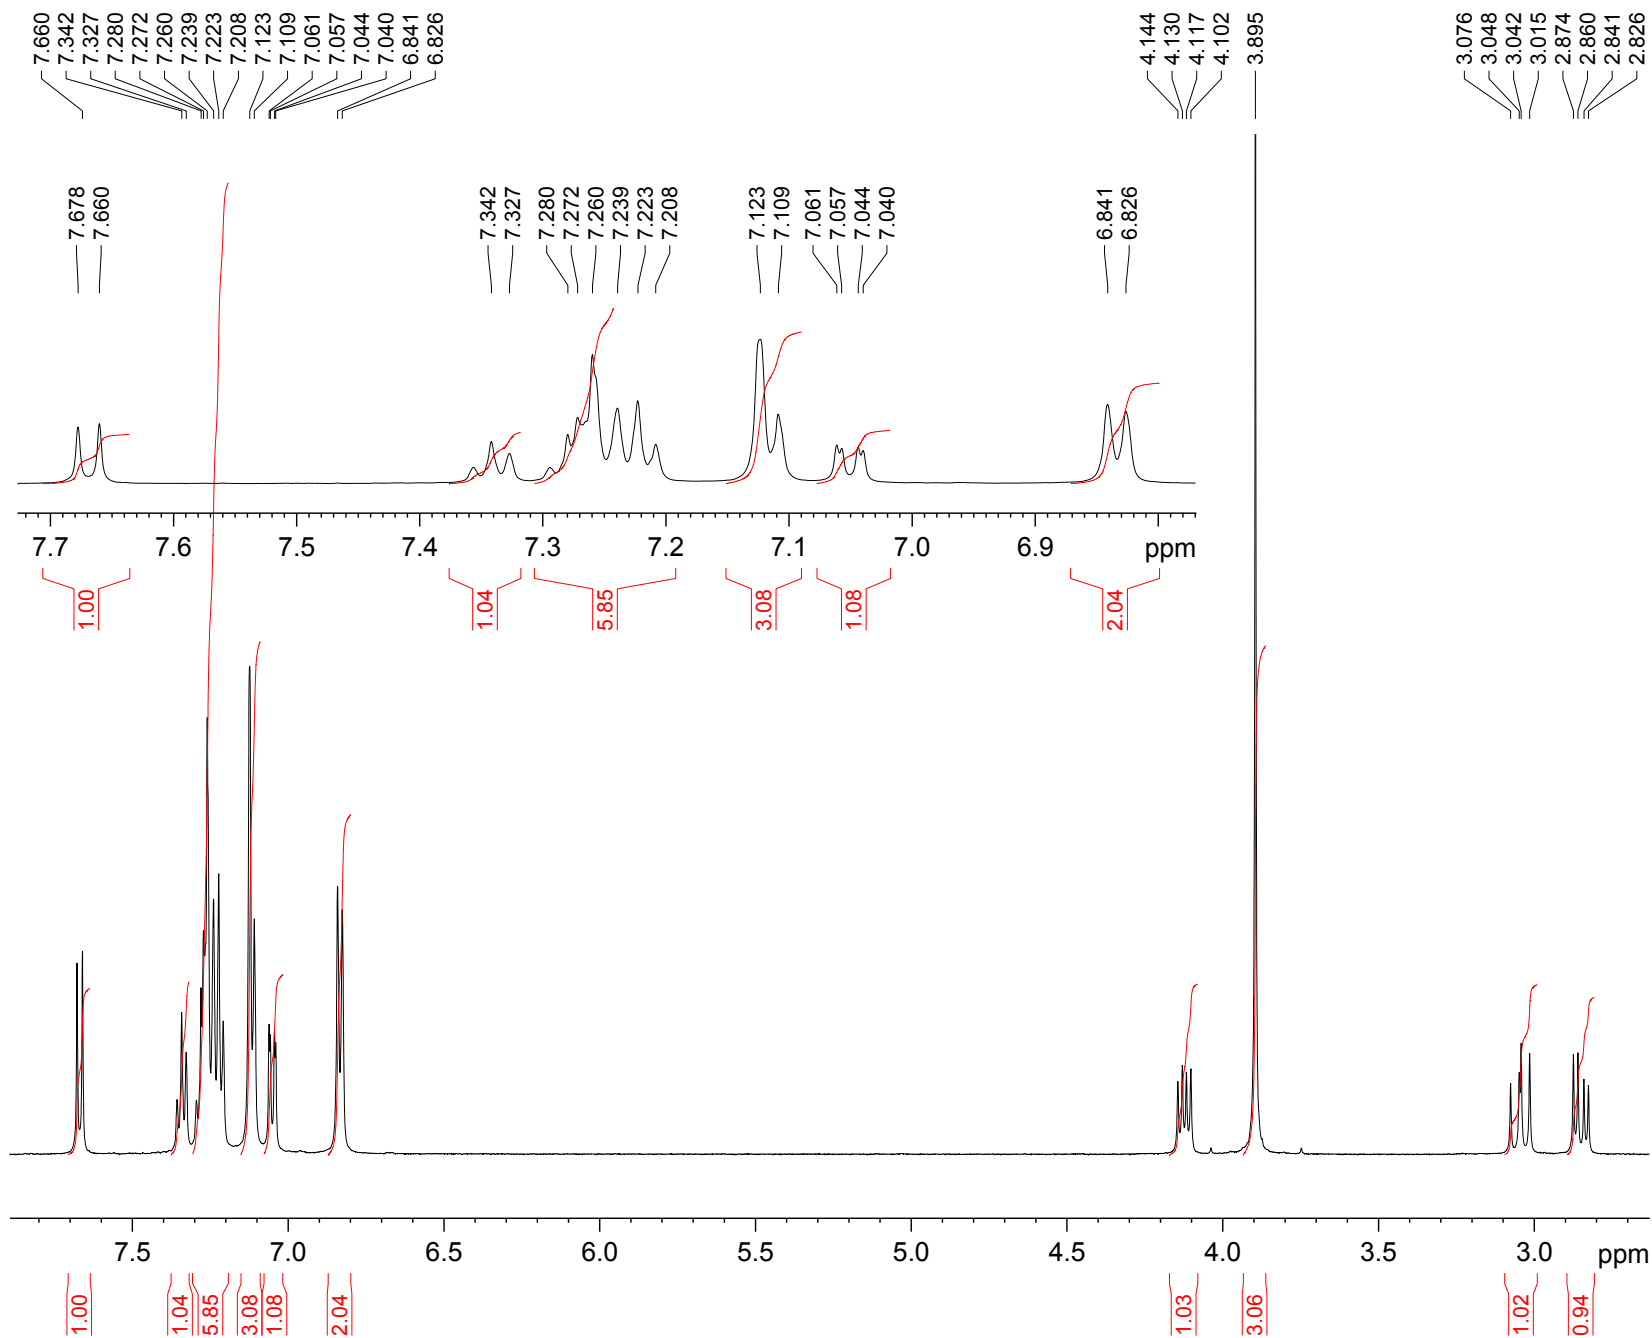

Current Data Parameters  
 NAME MR162-1  
 EXPNO 2  
 PROCNO 1

F2 - Acquisition Parameters  
 Date\_ 20080110  
 Time\_ 8.16  
 INSTRUM spect  
 PROBHD 5 mm PABBO BB-  
 PULPROG zg30  
 TD 65536  
 SOLVENT CDCl3  
 NS 10  
 DS 2  
 SWH 7002.801 Hz  
 FIDRES 0.106854 Hz  
 AQ 4.6793203 sec  
 RG 322  
 DW 71.400 usec  
 DE 6.50 usec  
 TE 297.9 K  
 D1 1.0000000 sec  
 TD0 1

===== CHANNEL f1 =====  
 NUC1 1H  
 P1 10.76 usec  
 PL1 0.00 dB  
 SF01 500.3932525 MHz

F2 - Processing parameters  
 SI 32768  
 SF 500.3900160 MHz  
 WDW EM  
 SSB 0  
 LB 0.30 Hz  
 GB 0  
 PC 1.00

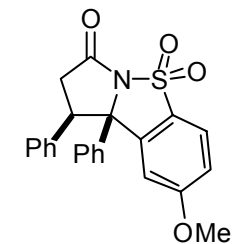

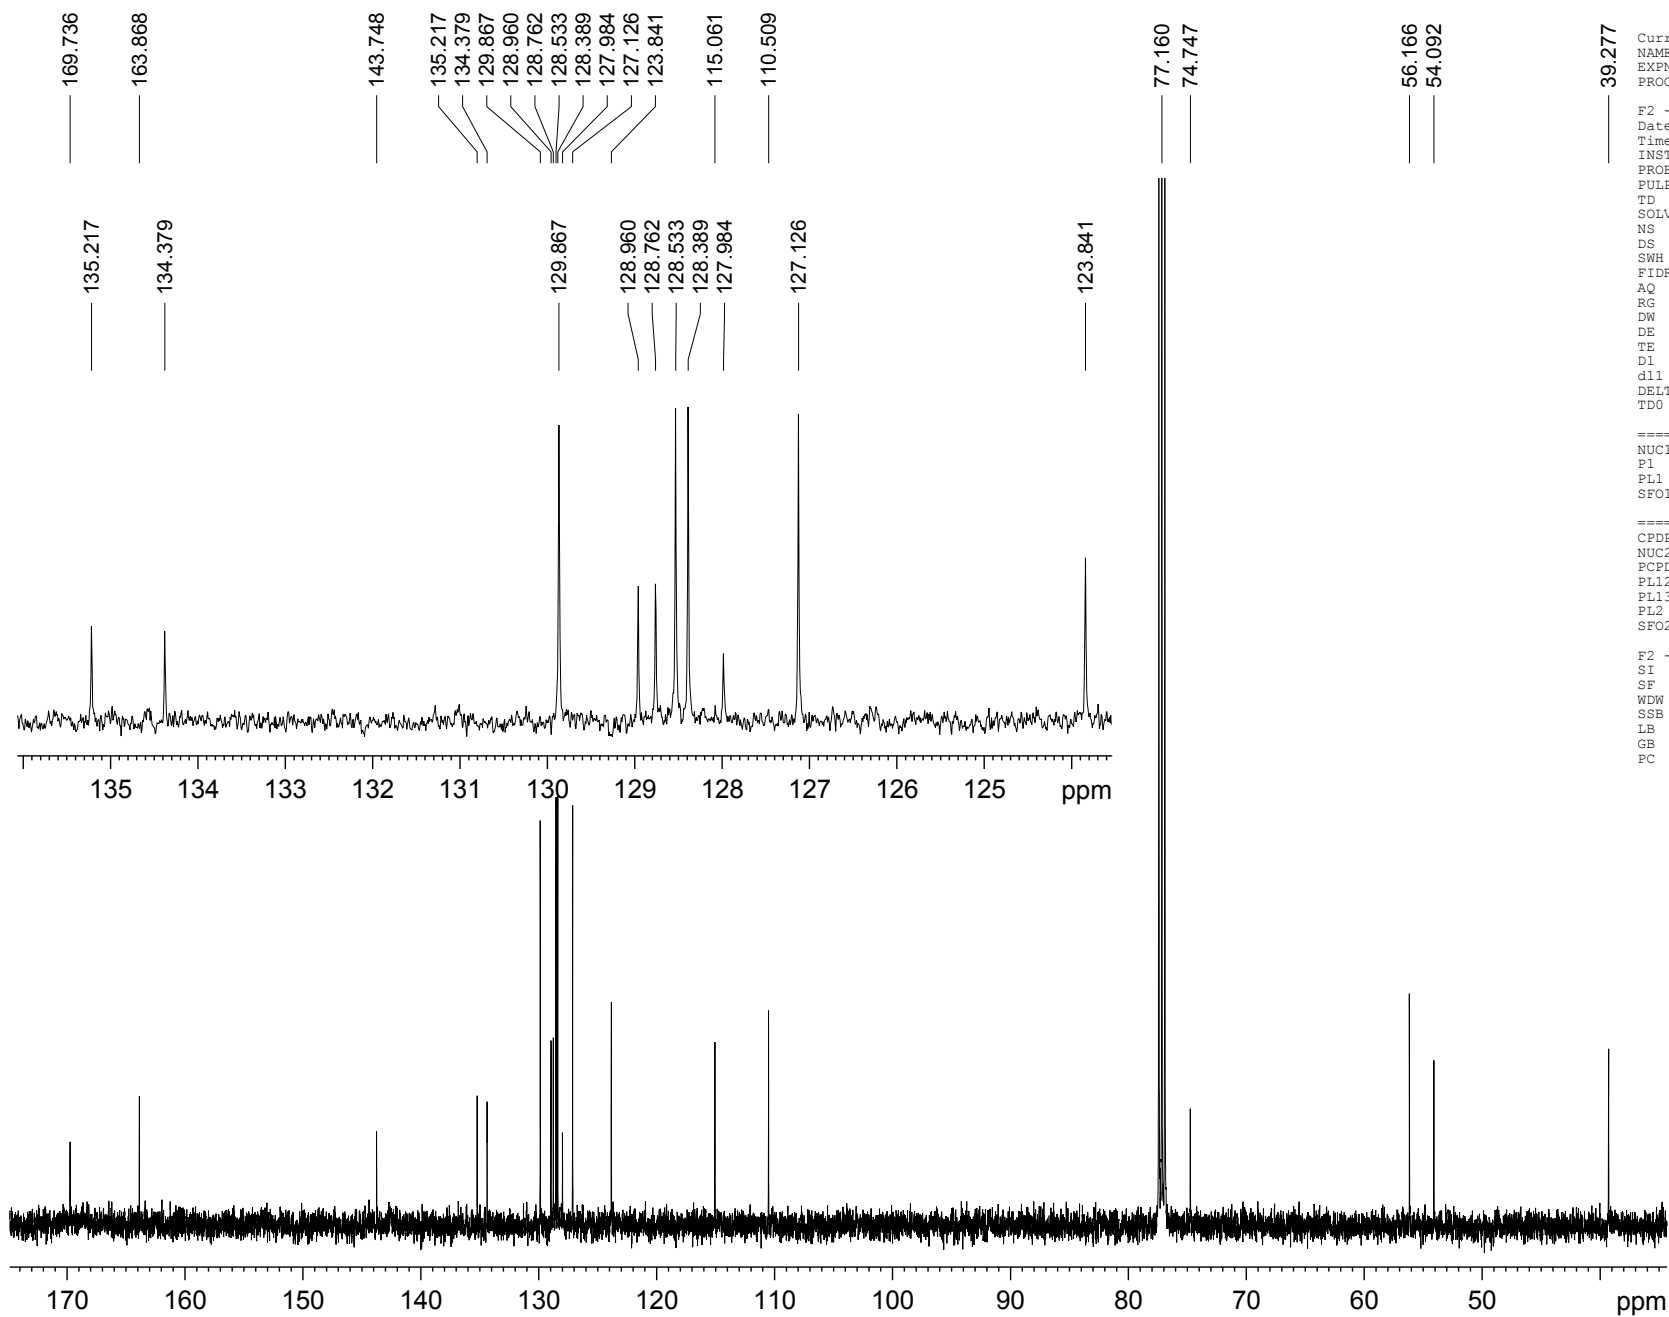

```

Current Data Parameters
NAME MR162-1
EXPNO 3
PROCNO 1

F2 - Acquisition Parameters
Date_ 20080110
Time 8.25
INSTRUM spect
PROBHD 5 mm PABBO BB-
PULPROG zgpg30
TD 65536
SOLVENT CDCl3
NS 133
DS 4
SWH 29761.904 Hz
FIDRES 0.454131 Hz
AQ 1.1010548 sec
RG 456
DW 16.800 usec
DE 6.50 usec
TE 298.7 K
D1 2.00000000 sec
d11 0.03000000 sec
DELTA 1.89999998 sec
TDO 1

===== CHANNEL f1 =====
NUC1 13C
P1 7.50 usec
PL1 1.00 dB
SFO1 125.8357479 MHz

===== CHANNEL f2 =====
CPDPRG2 waltz16
NUC2 1H
PCPD2 80.00 usec
PL12 17.43 dB
PL13 18.43 dB
PL2 0.00 dB
SFO2 500.3920016 MHz

F2 - Processing parameters
SI 32768
SF 125.8231508 MHz
WDW EM
SSB 0
LB 1.00 Hz
GB 0
PC 1.40

```



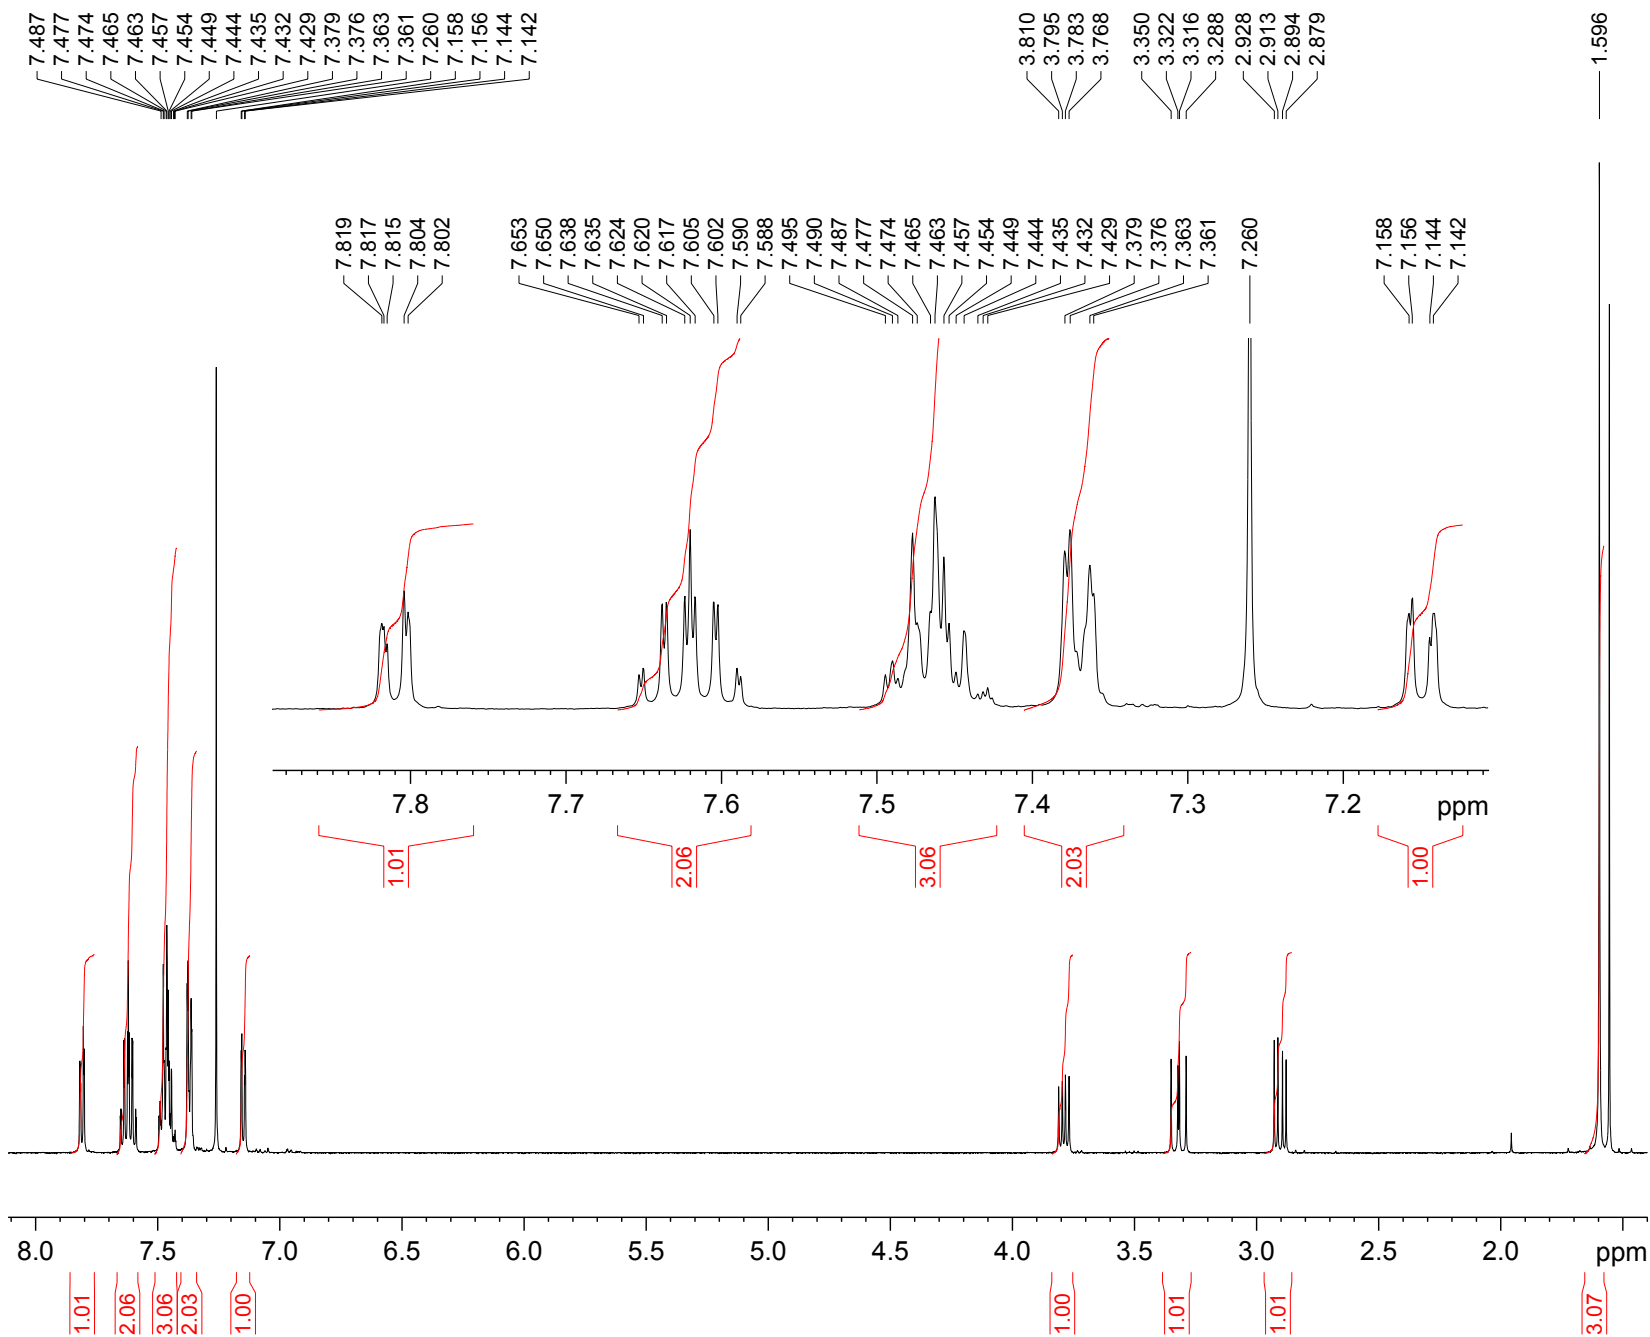

```

Current Data Parameters
NAME MR101-64
EXPNO 5
PROCNO 1

F2 - Acquisition Parameters
Date_ 20080922
Time_ 10.29
INSTRUM spect
PROBHD 5 mm PABBO BB-
PULPROG zg30
TD 65536
SOLVENT CDCl3
NS 16
DS 2
SWH 7002.801 Hz
FIDRES 0.106854 Hz
AQ 4.6793203 sec
RG 912
DW 71.400 usec
DE 6.50 usec
TE 297.3 K
D1 1.00000000 sec
TDO 1

===== CHANNEL f1 =====
NUC1 1H
P1 10.76 usec
PL1 0.00 dB
SFO1 500.3932525 MHz

F2 - Processing parameters
SI 32768
SF 500.3900160 MHz
WDW EM
SSB 0
LB 0.30 Hz
GB 0
PC 1.00
    
```

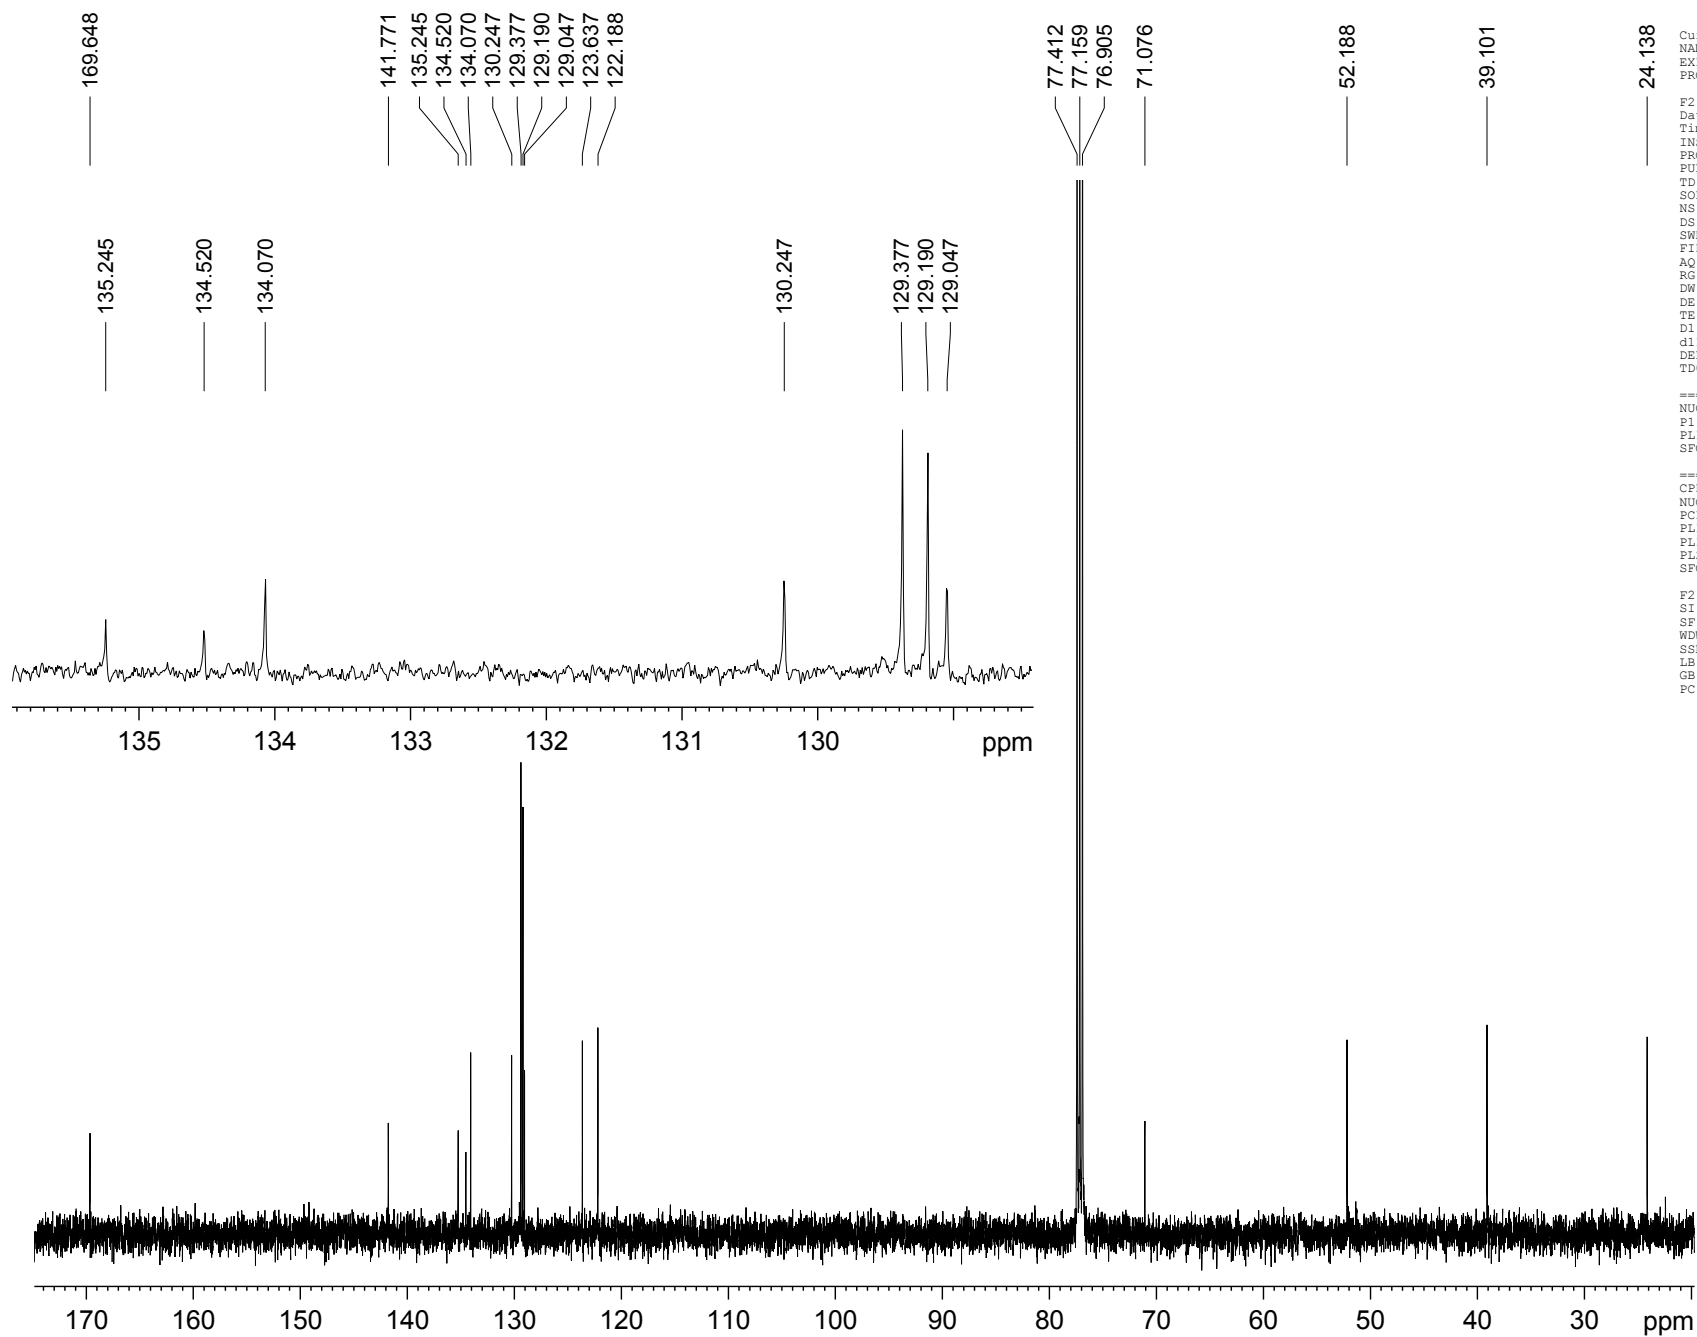

```

Current Data Parameters
NAME                MR101-63
EXPNO                3
PROCNO              1

F2 - Acquisition Parameters
Date_                20080801
Time_                18.18
INSTRUM              spect
PROBHD               5 mm PABBO BB-
PULPROG              zgpg30
TD                   65536
SOLVENT              CDCl3
NS                   211
DS                   4
SWH                  29761.904 Hz
FIDRES               0.454131 Hz
AQ                   1.1010548 sec
RG                   912
DW                   16.800 usec
DE                   6.50 usec
TE                   298.6 K
D1                   2.00000000 sec
d11                  0.03000000 sec
DELTA                1.89999998 sec
TDO                  1

===== CHANNEL f1 =====
NUC1                  13C
P1                    7.50 usec
PL1                   1.00 dB
SFO1                  125.8357479 MHz

===== CHANNEL f2 =====
CPDPRG2              waltz16
NUC2                  1H
PCPD2                80.00 usec
PL12                  17.43 dB
PL13                  18.43 dB
PL2                   0.00 dB
SFO2                  500.3920016 MHz

F2 - Processing parameters
SI                    32768
SF                    125.8231500 MHz
WDW                   EM
SSB                   0
LB                    1.00 Hz
GB                    0
PC                    1.40

```

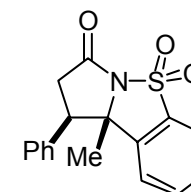

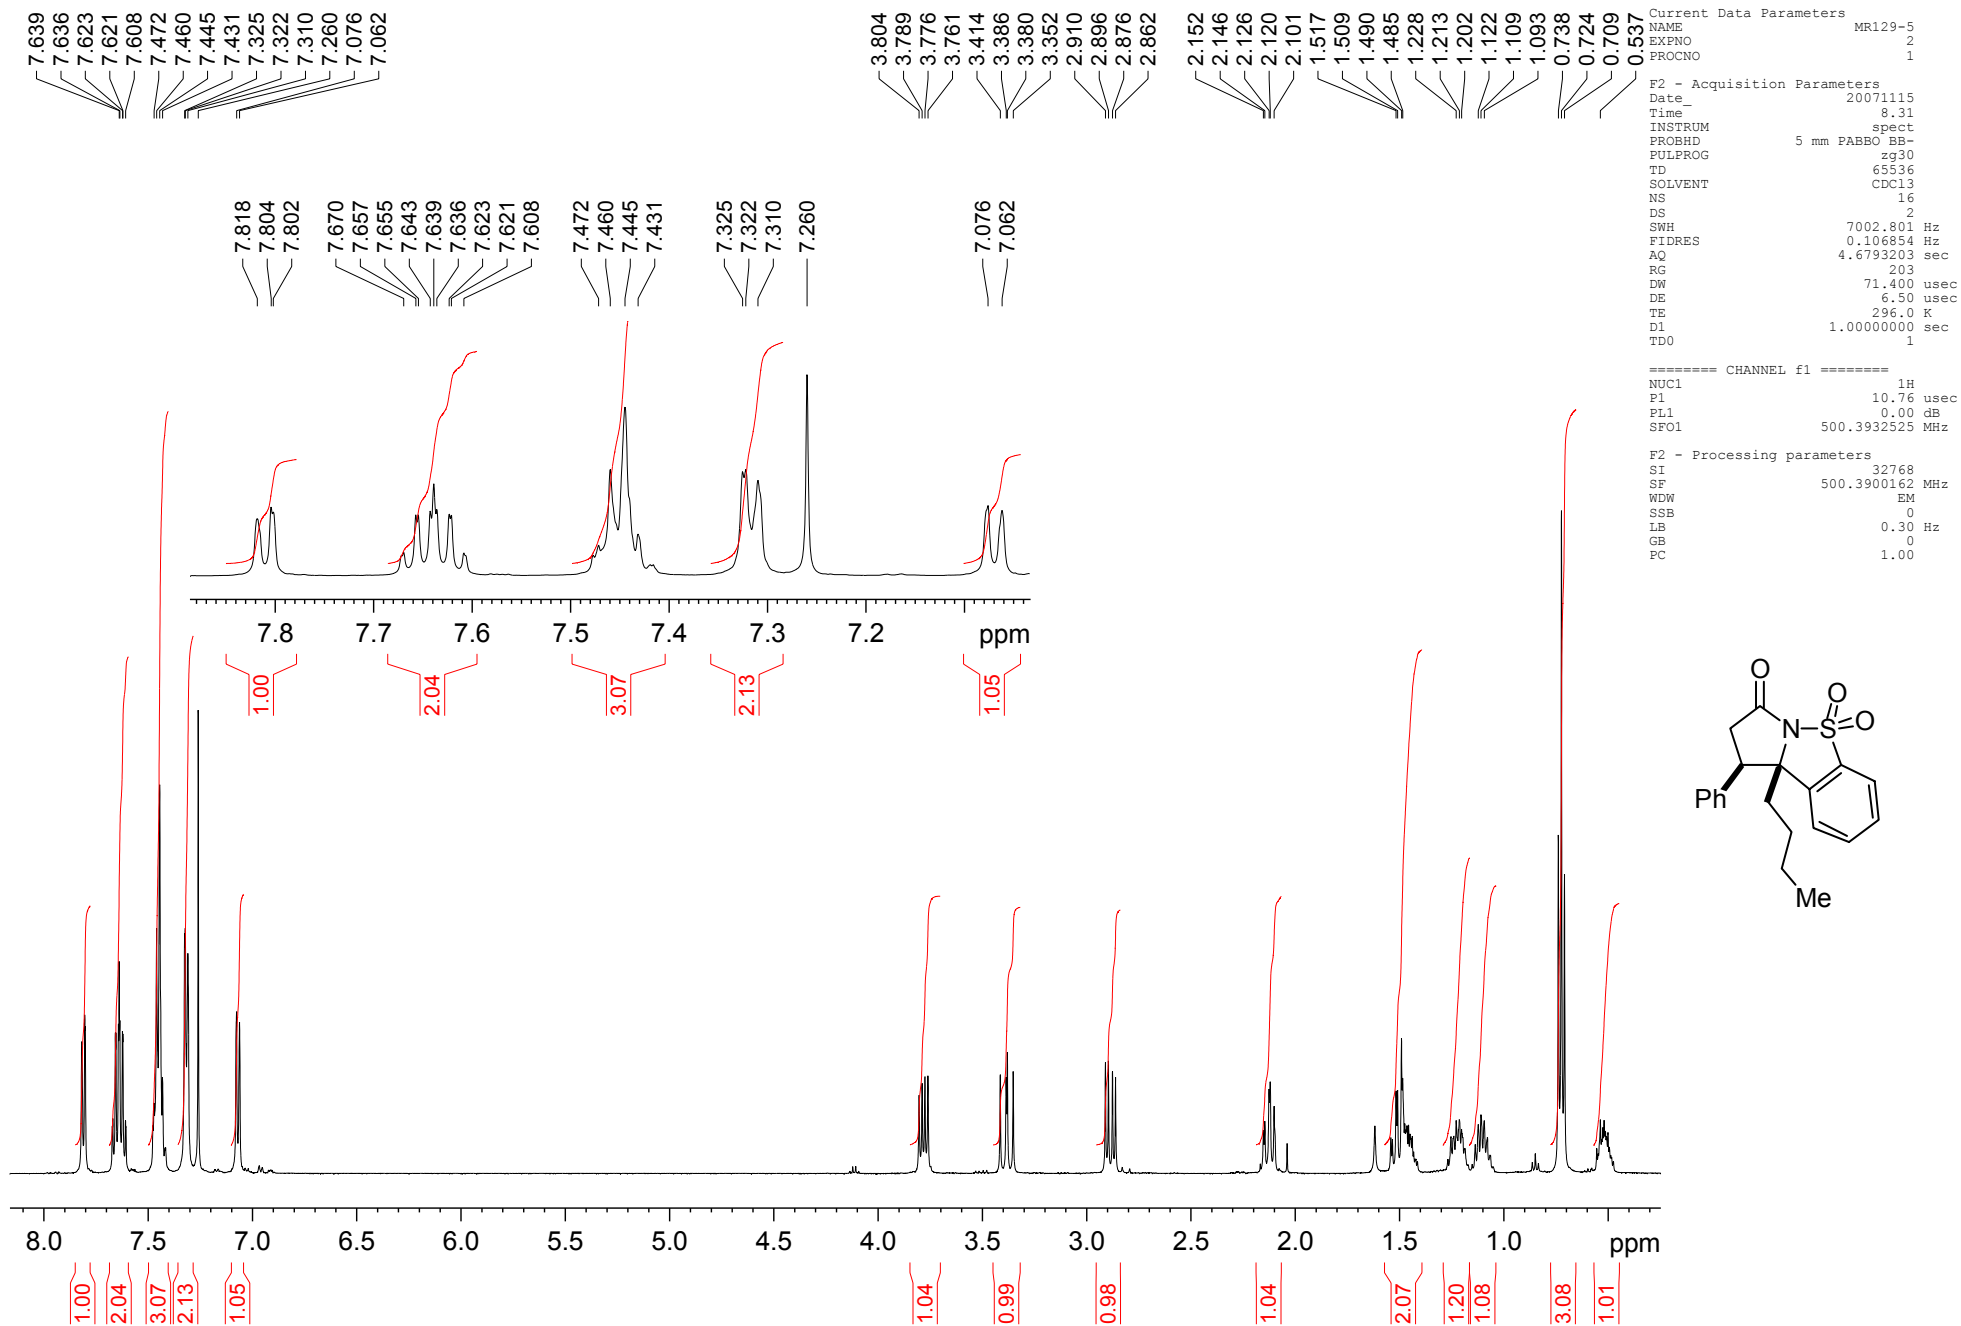

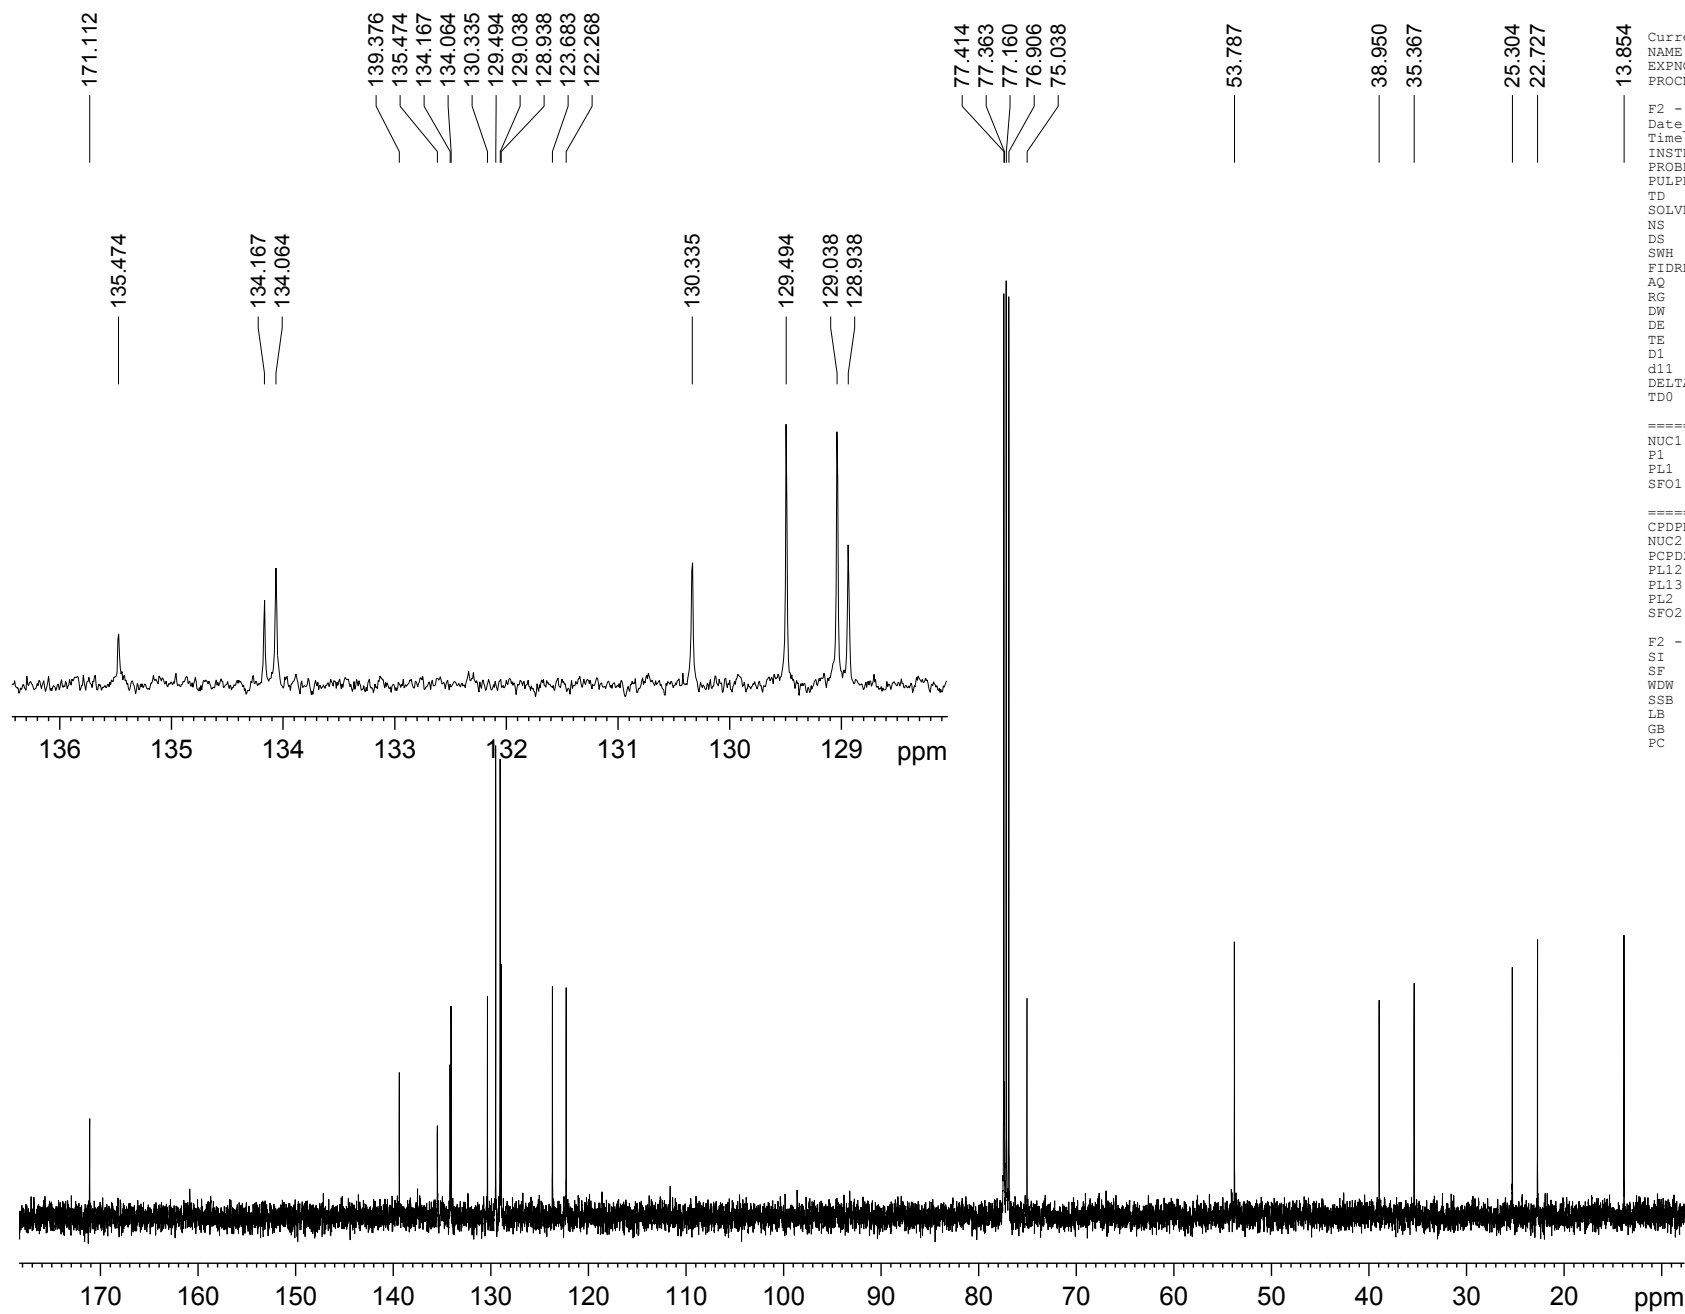

```

Current Data Parameters
NAME MR129-5
EXPNO 3
PROCNO 1

F2 - Acquisition Parameters
Date_ 20071115
Time 8.34
INSTRUM spect
PROBHD 5 mm PABBO BB-
PULPROG zgpg30
TD 65536
SOLVENT CDCl3
NS 39
DS 4
SWH 29761.904 Hz
FIDRES 0.454131 Hz
AQ 1.1010548 sec
RG 456
DW 16.800 usec
DE 6.50 usec
TE 296.5 K
D1 2.0000000 sec
d11 0.0300000 sec
DELTA 1.8999999 sec
TDO 1

===== CHANNEL f1 =====
NUC1 13C
P1 7.50 usec
PL1 1.00 dB
SFO1 125.8357479 MHz

===== CHANNEL f2 =====
CPDPRG2 waltz16
NUC2 1H
PCPD2 80.00 usec
PL12 17.43 dB
PL13 18.43 dB
PL2 0.00 dB
SFO2 500.3920016 MHz

F2 - Processing parameters
SI 32768
SF 125.8231542 MHz
WDW EM
SSB 0
LB 1.00 Hz
GB 0
PC 1.40

```

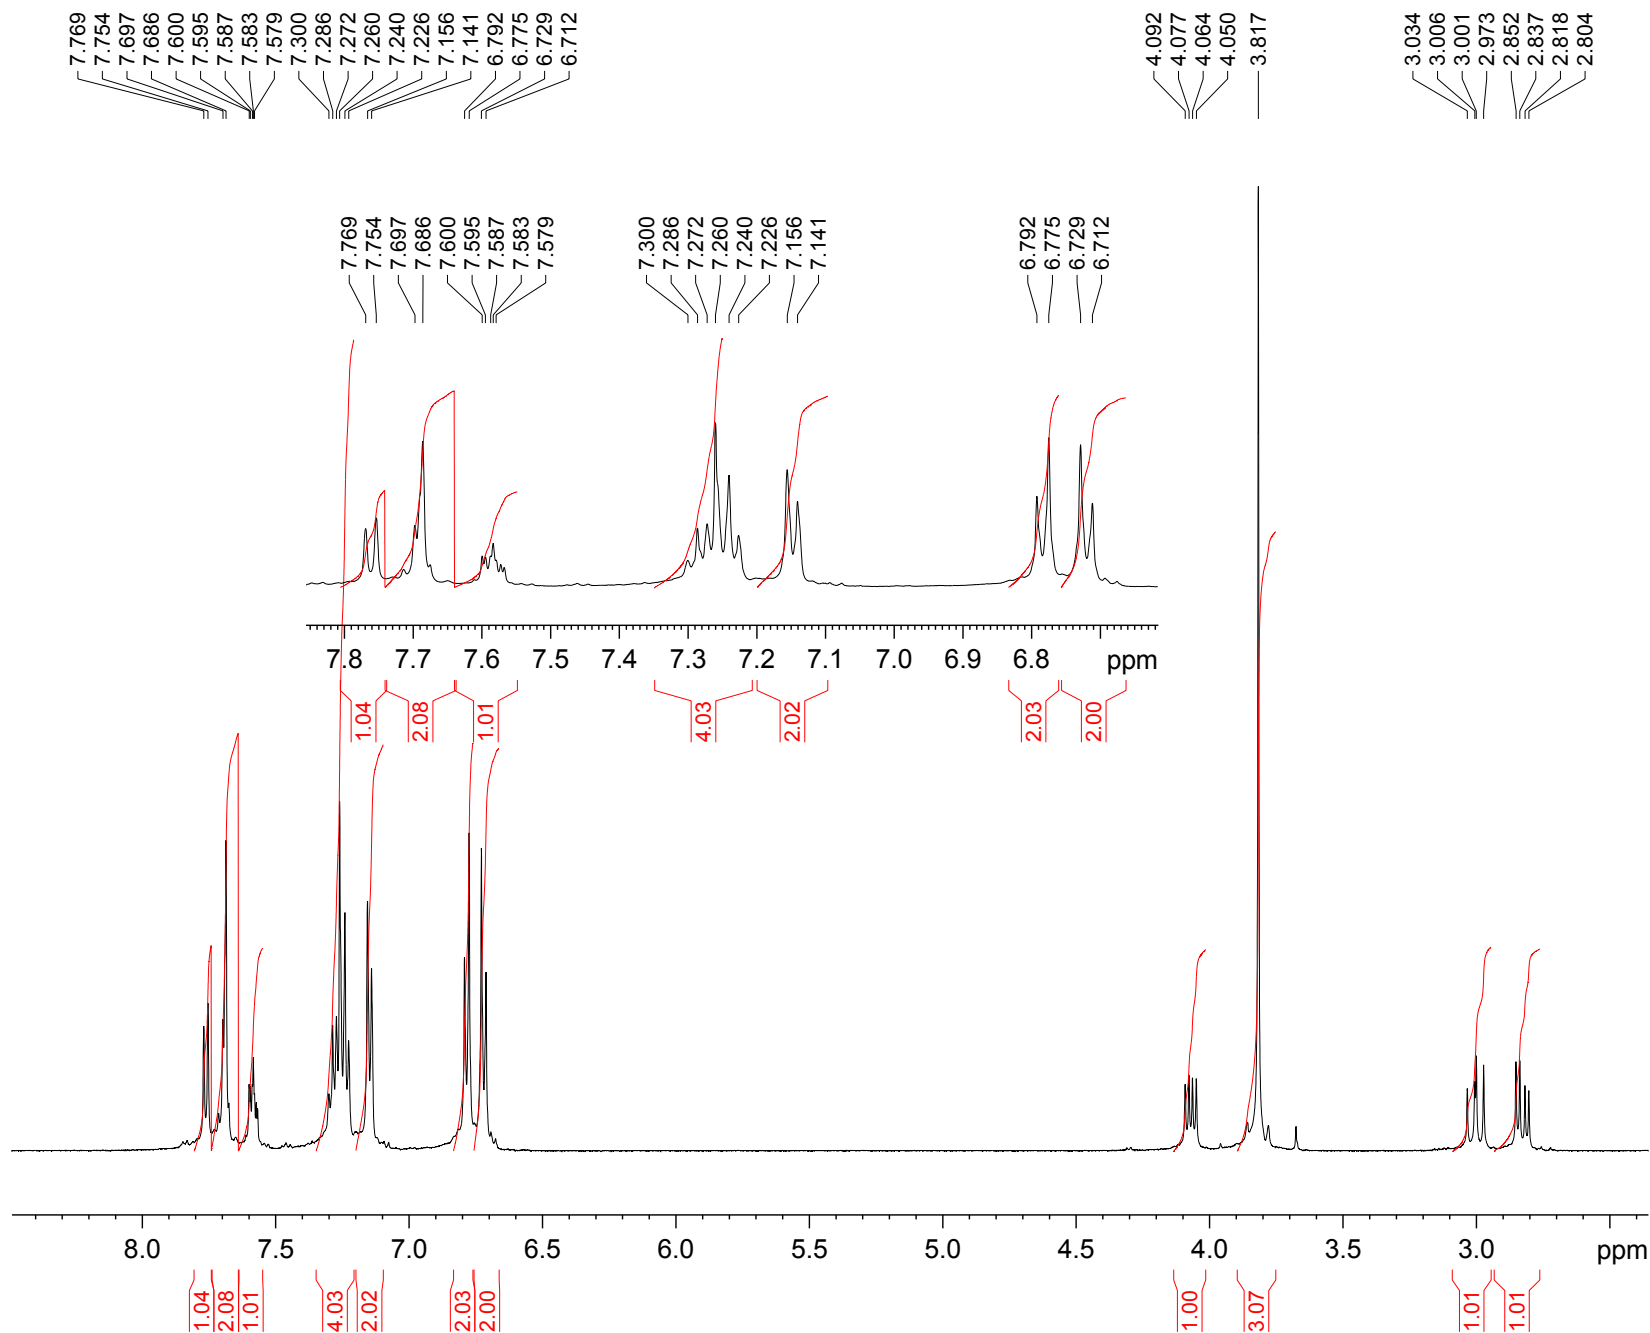

```

Current Data Parameters
NAME                MR210-1cis
EXPNO                3
PROCNO              1

F2 - Acquisition Parameters
Date_                20080927
Time_                19.16
INSTRUM             spect
PROBHD              5 mm FAPBO BB-
PULPROG             zg30
TD                  65536
SOLVENT             CDCl3
NS                  16
DS                   2
SWH                 7002.801 Hz
FIDRES              0.106854 Hz
AQ                  4.6793203 sec
RG                   406
DW                  71.400 usec
DE                   6.50 usec
TE                  300.0 K
D1                  1.00000000 sec
TDO                  1

===== CHANNEL f1 =====
NUC1                 1H
P1                   10.76 usec
PL1                  0.00 dB
SFO1                 500.3932525 MHz

F2 - Processing parameters
SI                   32768
SF                   500.3900160 MHz
WDW                  EM
SSB                  0
LB                   0.30 Hz
GB                   0
PC                   1.00

```

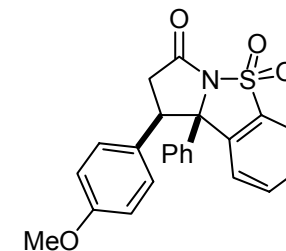

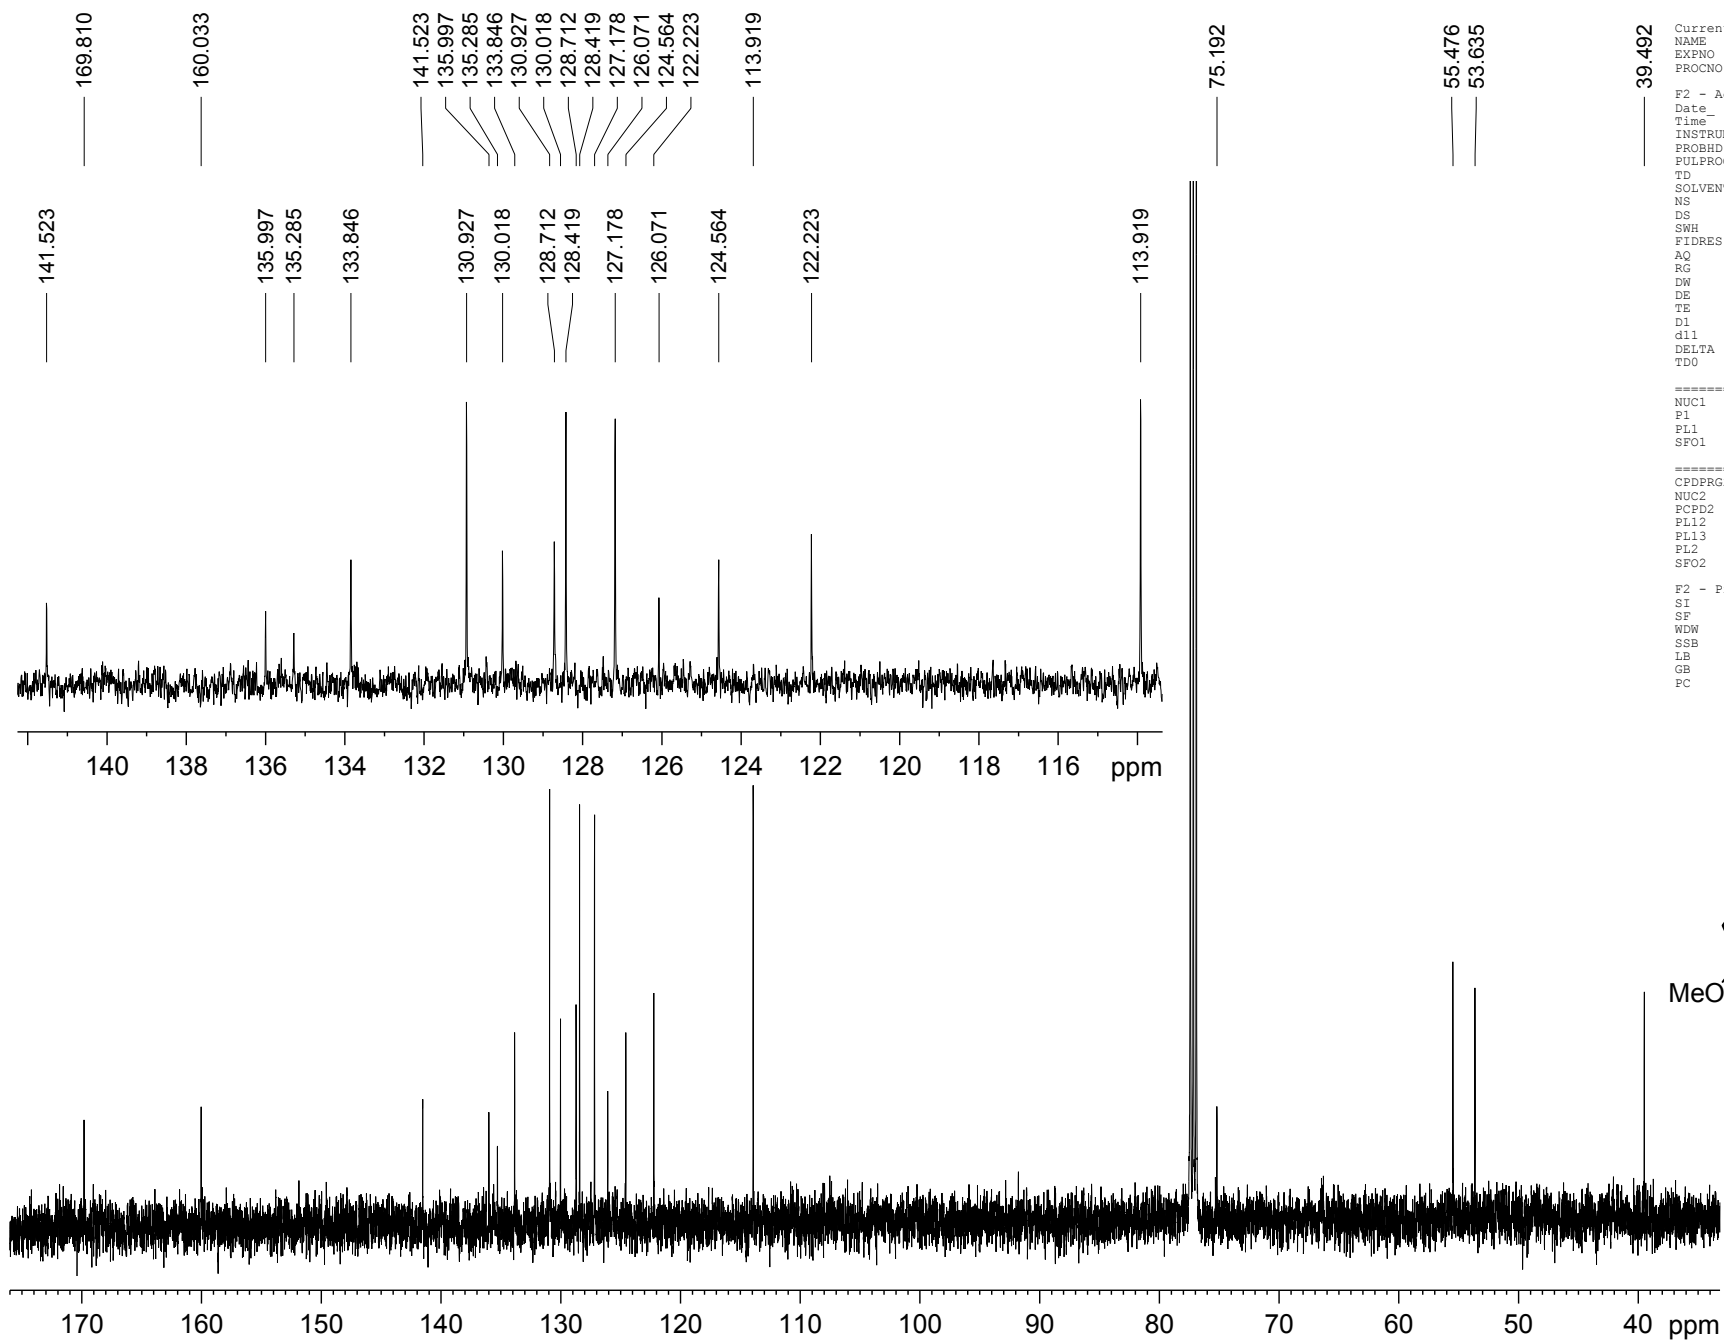

```

Current Data Parameters
NAME             MR210-1cis
EXPNO            2
PROCNO           1

F2 - Acquisition Parameters
Date_            20080602
Time             19.18
INSTRUM          spect
PROBHD           5 mm PABBO BB-
PULPROG          zgpg30
TD               65536
SOLVENT          CDCl3
NS               109
DS               4
SWH              29761.904 Hz
FIDRES           0.454131 Hz
AQ               1.1010548 sec
RG               575
DW               16.800 usec
DE               6.50 usec
TE               298.9 K
D1               2.00000000 sec
d11              0.03000000 sec
DELTA            1.89999998 sec
TDO              1

===== CHANNEL f1 =====
NUC1              13C
P1                7.50 usec
PL1               1.00 dB
SFO1              125.8357479 MHz

===== CHANNEL f2 =====
CPDPRG2          waltz16
NUC2              1H
PCPD2            80.00 usec
PL12             17.43 dB
PL13             18.43 dB
PL2              9.00 dB
SFO2              500.3920016 MHz

F2 - Processing parameters
SI                32768
SF                125.8231500 MHz
WDW               EM
SSB               0
LB                1.00 Hz
GB                0
PC                1.40

```

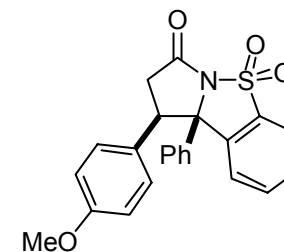

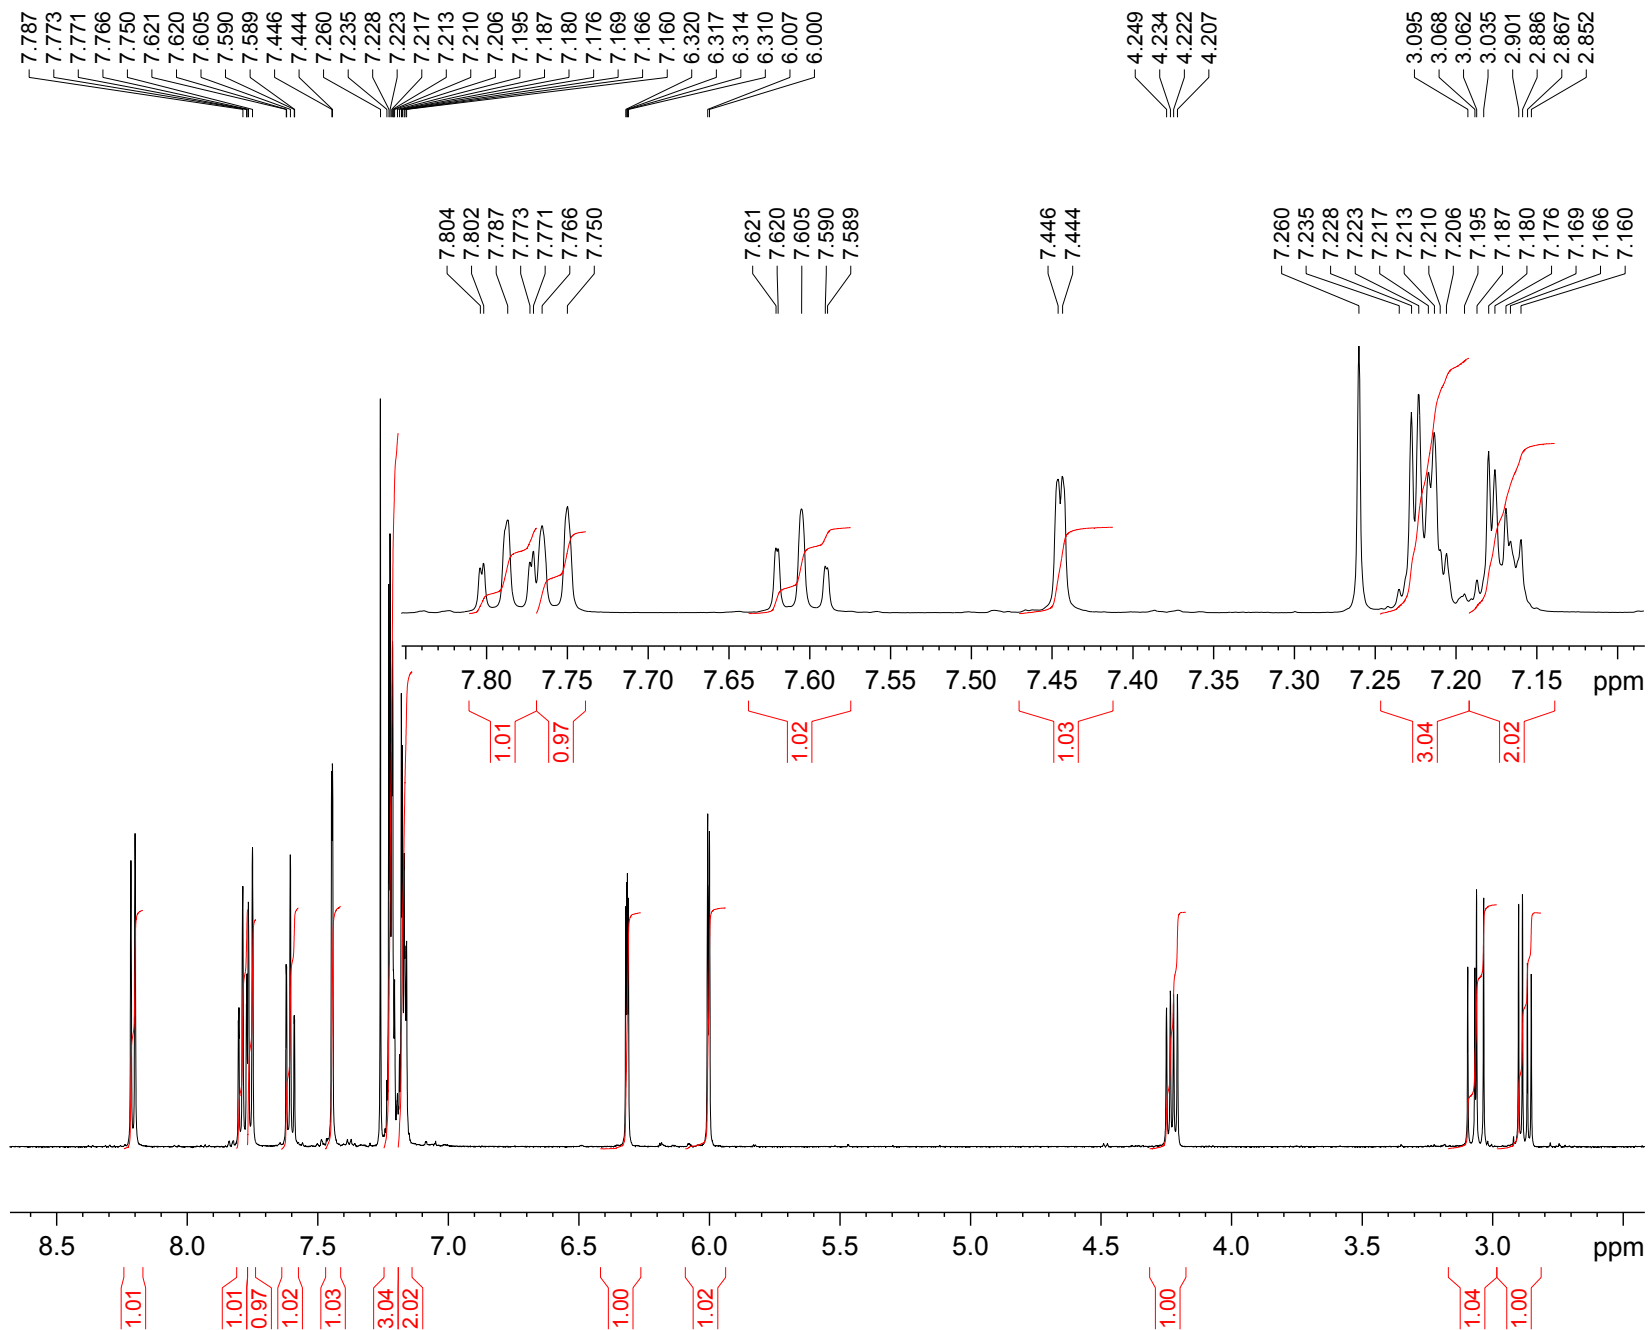

Current Data Parameters  
 MR209-1  
 NAME  
 EXPNO 9  
 PROCNO 1

F2 - Acquisition Parameters  
 Date\_ 20081003  
 Time 9.42  
 INSTRUM spect  
 PROBHD 5 mm DUL D/1H-  
 PULPROG zg30  
 TD 6536  
 SOLVENT CDCl3  
 NS 16  
 DS 2  
 SWH 7002.801 Hz  
 FIDRES 0.106854 Hz  
 AQC 4.6793203 sec  
 RG 456  
 DW 71.400 usec  
 DE 6.50 usec  
 TE 298.2 K  
 D1 1.00000000 sec  
 TDO 1

===== CHANNEL f1 =====  
 NUC1 1H  
 P1 10.00 usec  
 PL1 -2.00 dB  
 SFO1 500.3932525 MHz

F2 - Processing parameters  
 SI 32768  
 SF 500.3900160 MHz  
 WDW EM  
 SSB 0  
 LB 0.30 Hz  
 GB 0  
 PC 1.00

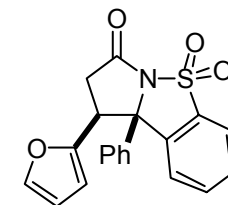

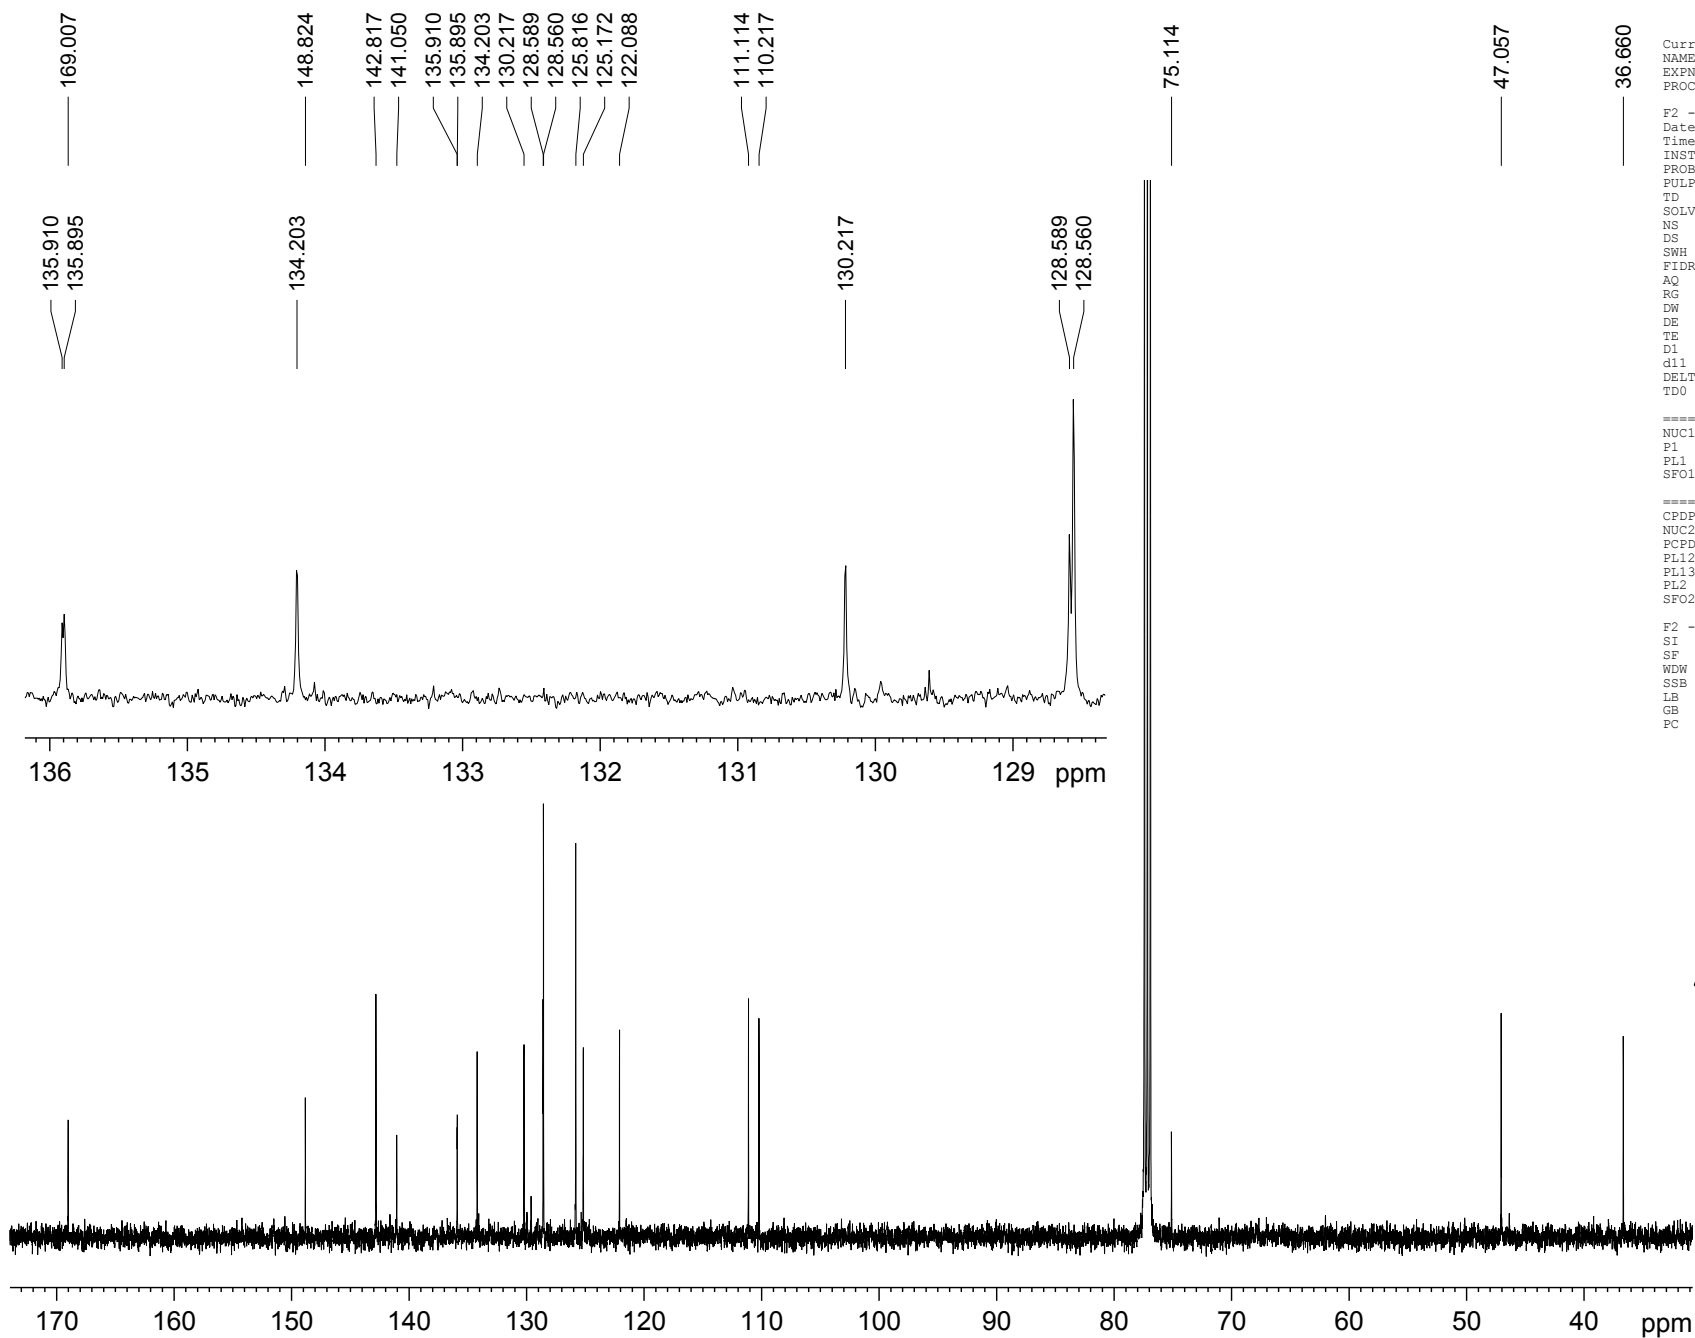

Current Data Parameters  
 NAME MR209-1  
 EXPNO 5  
 PROCNO 1

F2 - Acquisition Parameters  
 Date\_ 20080928  
 Time 1.22  
 INSTRUM spect  
 PROBHD 5 mm PABBO BB-  
 PULPROG zgpg30  
 TD 65536  
 SOLVENT CDCl3  
 NS 462  
 DS 4  
 SWH 29761.904 Hz  
 FIDRES 0.454131 Hz  
 AQ 1.1010548 sec  
 RG 912  
 DW 16.800 usec  
 DE 6.50 usec  
 TE 298.5 K  
 D1 2.0000000 sec  
 d11 0.0300000 sec  
 DELTA 1.89999998 sec  
 TDO 1

===== CHANNEL f1 =====  
 NUC1 13C  
 P1 7.50 usec  
 PL1 1.00 dB  
 SFO1 125.8357479 MHz

===== CHANNEL f2 =====  
 CPDPRG2 waltz16  
 NUC2 1H  
 PCPD2 80.00 usec  
 PL12 17.43 dB  
 PL13 18.43 dB  
 PL2 0.00 dB  
 SFO2 500.3920016 MHz

F2 - Processing parameters  
 SI 32768  
 SF 125.8231500 MHz  
 WDW EM  
 SSB 0  
 LB 1.00 Hz  
 GB 0  
 FC 1.40



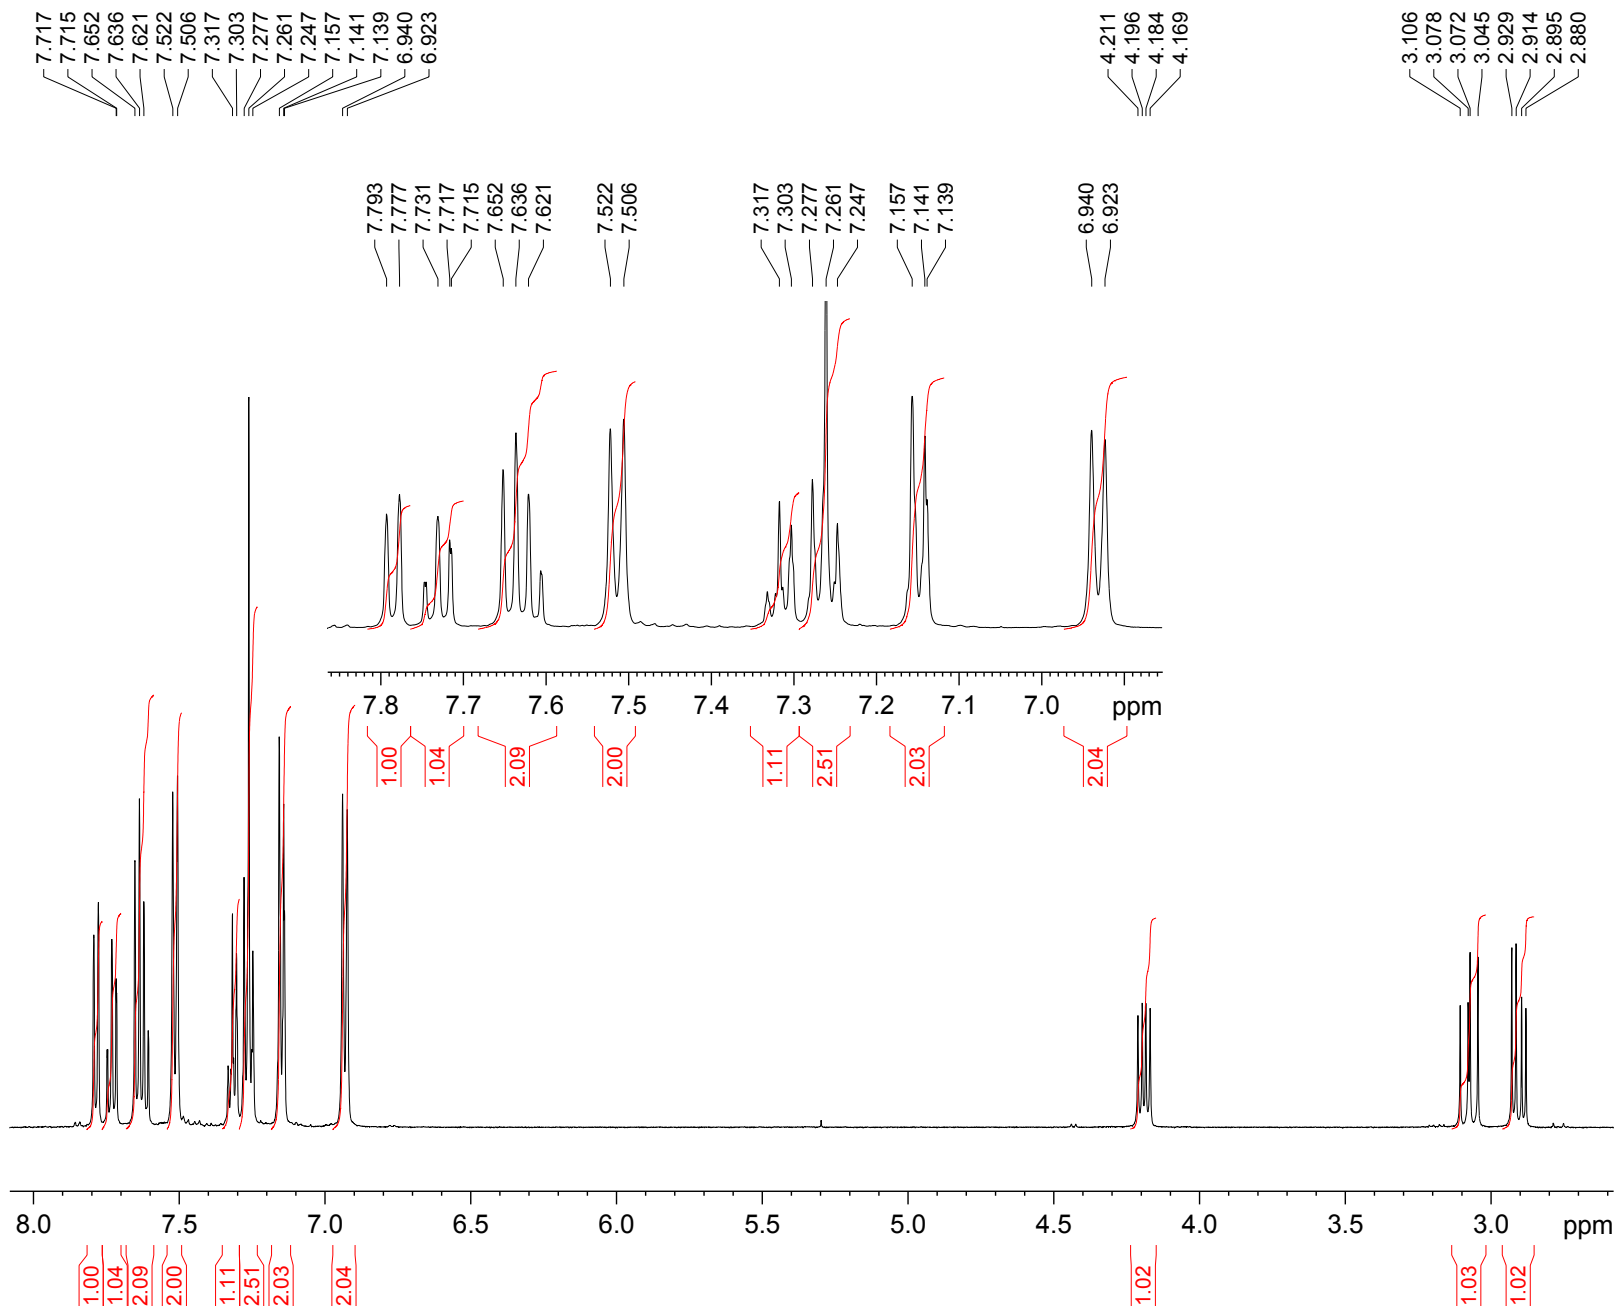

```

Current Data Parameters
NAME MR211-1
EXPNO 2
PROCNO 1

F2 - Acquisition Parameters
Date_ 20080709
Time_ 17.35
INSTRUM spect
PROBHD 5 mm PABBO BB-
PULPROG zg30
TD 65536
SOLVENT CDCl3
NS 16
DS 2
SWH 7002.801 Hz
FIDRES 0.106854 Hz
AQ 4.6793203 sec
RG 362
DM 71.400 usec
DE 6.50 usec
TE 298.2 K
D1 1.0000000 sec
TD0 1

===== CHANNEL f1 =====
NUC1 1H
P1 10.76 usec
PL1 0.00 dB
SFO1 500.3932525 MHz

F2 - Processing parameters
SI 32768
SF 500.3900160 MHz
WDW EM
SSB 0
LB 0.30 Hz
GB 0
PC 1.00
    
```

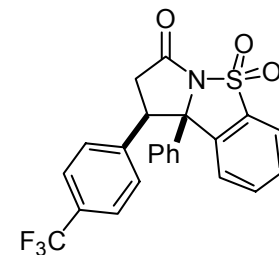

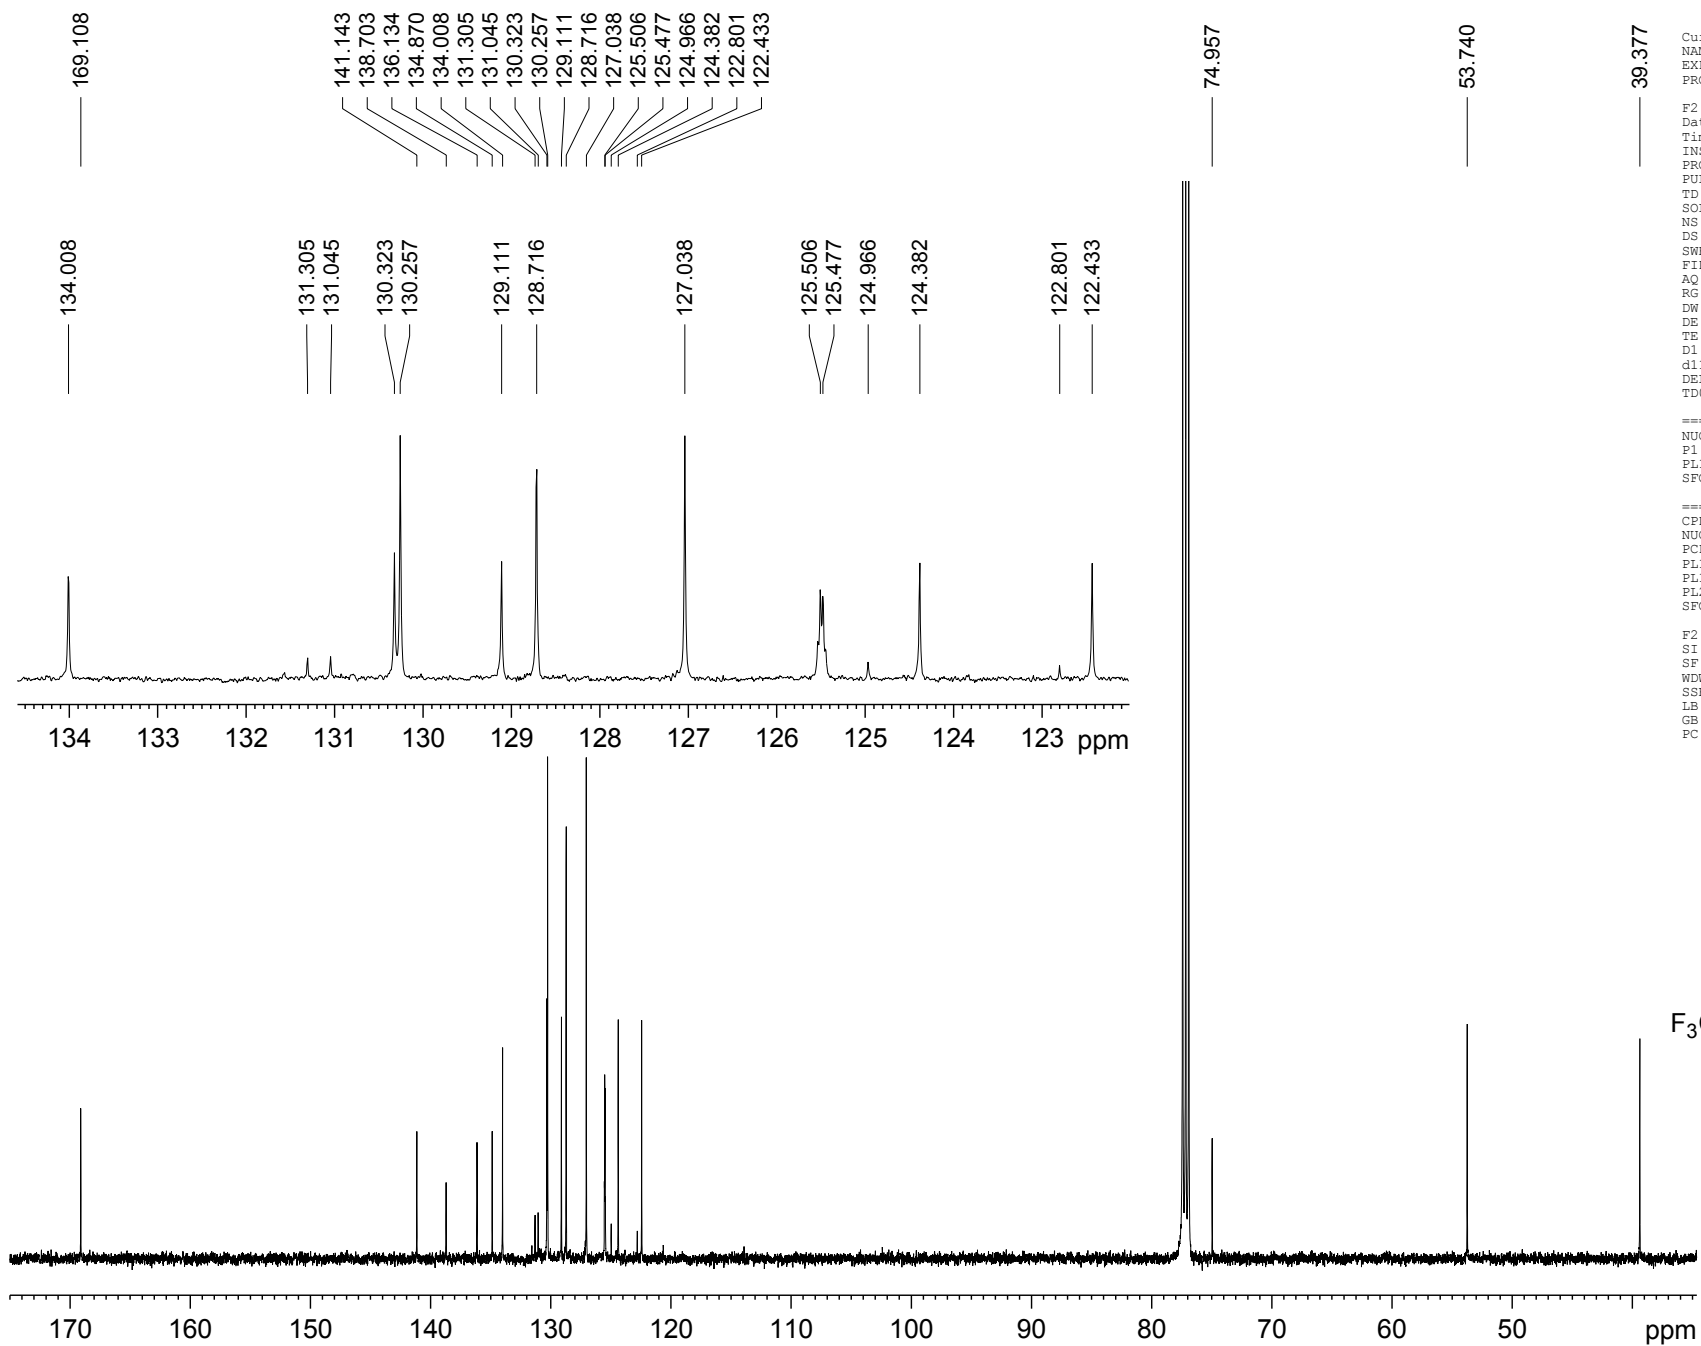

```

Current Data Parameters
NAME                MR211-1
EXPNO                5
PROCNO              1

F2 - Acquisition Parameters
Date_                20080927
Time                20.35
INSTRUM              spect
PROBHD               5 mm PABBO BB-
PULPROG              zgpg30
TD                   65536
SOLVENT              CDCl3
NS                   1571
DS                   4
SWH                  29761.904 Hz
FIDRES               0.454131 Hz
AQ                   1.1010548 sec
RG                   912
DW                   16.800 usec
DE                   6.50 usec
TE                   298.6 K
D1                   2.00000000 sec
d11                  0.03000000 sec
DELTA                1.89999998 sec
TD0                  1

===== CHANNEL f1 =====
NUC1                  13C
P1                    7.50 usec
PL1                   1.00 dB
SFO1                  125.8357479 MHz

===== CHANNEL f2 =====
CPDPRG2              waltz16
NUC2                  1H
PCPD2                80.00 usec
PL12                  17.43 dB
PL13                  18.43 dB
PL2                   0.00 dB
SFO2                  500.3920016 MHz

F2 - Processing parameters
SI                    32768
SF                    125.8231500 MHz
WDW                   EM
SBB                   0
LB                    1.00 Hz
GB                    0
PC                    1.40

```

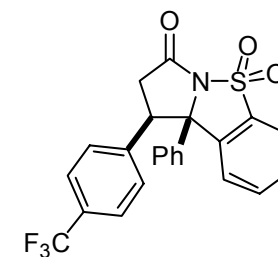

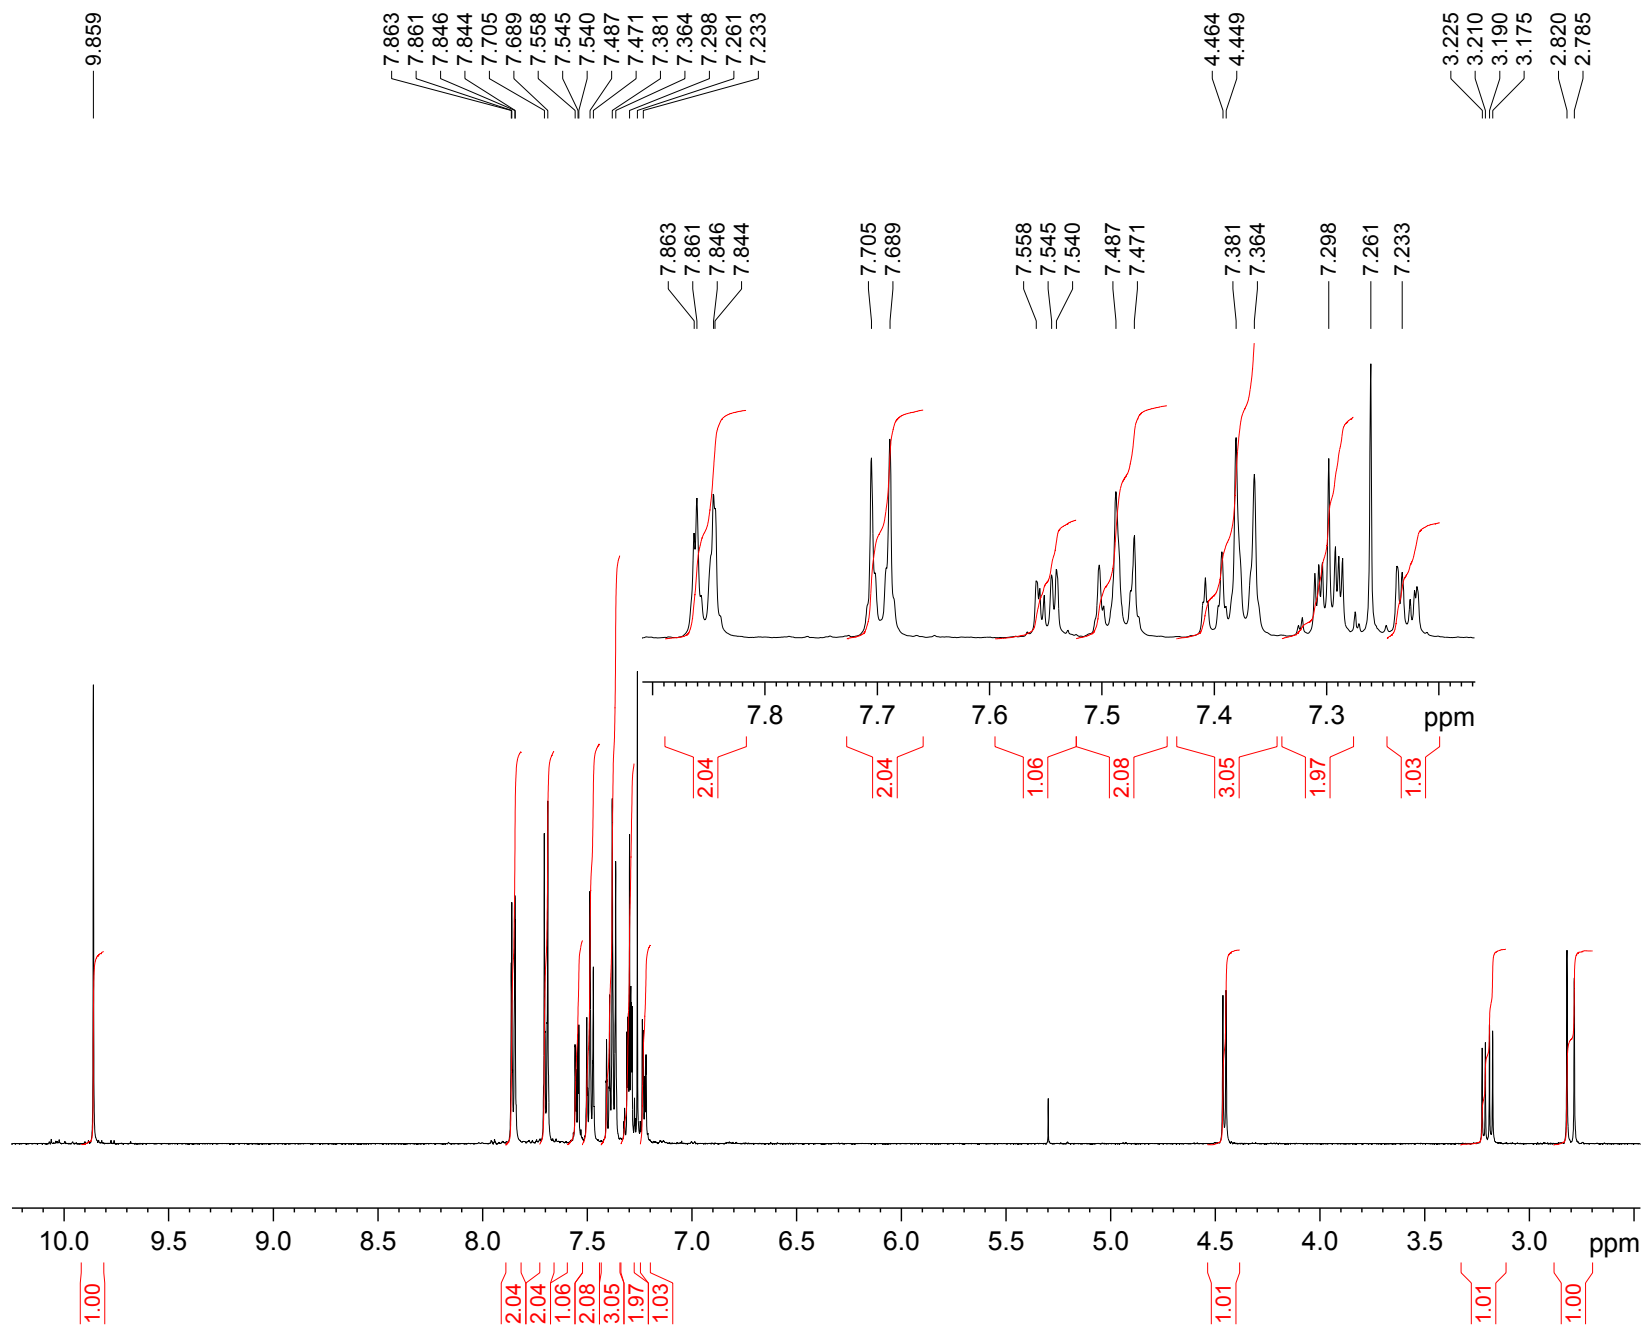

```

Current Data Parameters
NAME                MR218-1
EXPNO               2
PROCNO              1

F2 - Acquisition Parameters
Date_               20080723
Time                10.29
INSTRUM             spect
PROBHD              5 mm PABBO BB-
PULPROG             zg30
TD                  65536
SOLVENT             CDCl3
NS                  16
DS                  2
SWH                 7002.801 Hz
FIDRES              0.106854 Hz
AQ                  4.6793203 sec
RG                  645
DE                  71.400 usec
TE                  298.3 K
D1                  1.00000000 sec
TD0                 1

===== CHANNEL f1 =====
NUC1                1H
P1                  10.76 usec
PL1                 0.00 dB
SFO1                500.3932525 MHz

F2 - Processing parameters
SI                  32768
SF                  500.3900160 MHz
WDW                 EM
SSB                 0
LB                  0.30 Hz
GB                  0
PC                  1.00

```

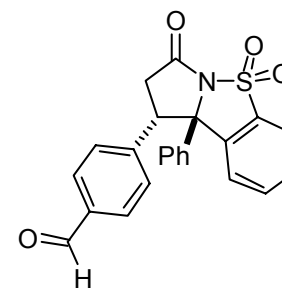

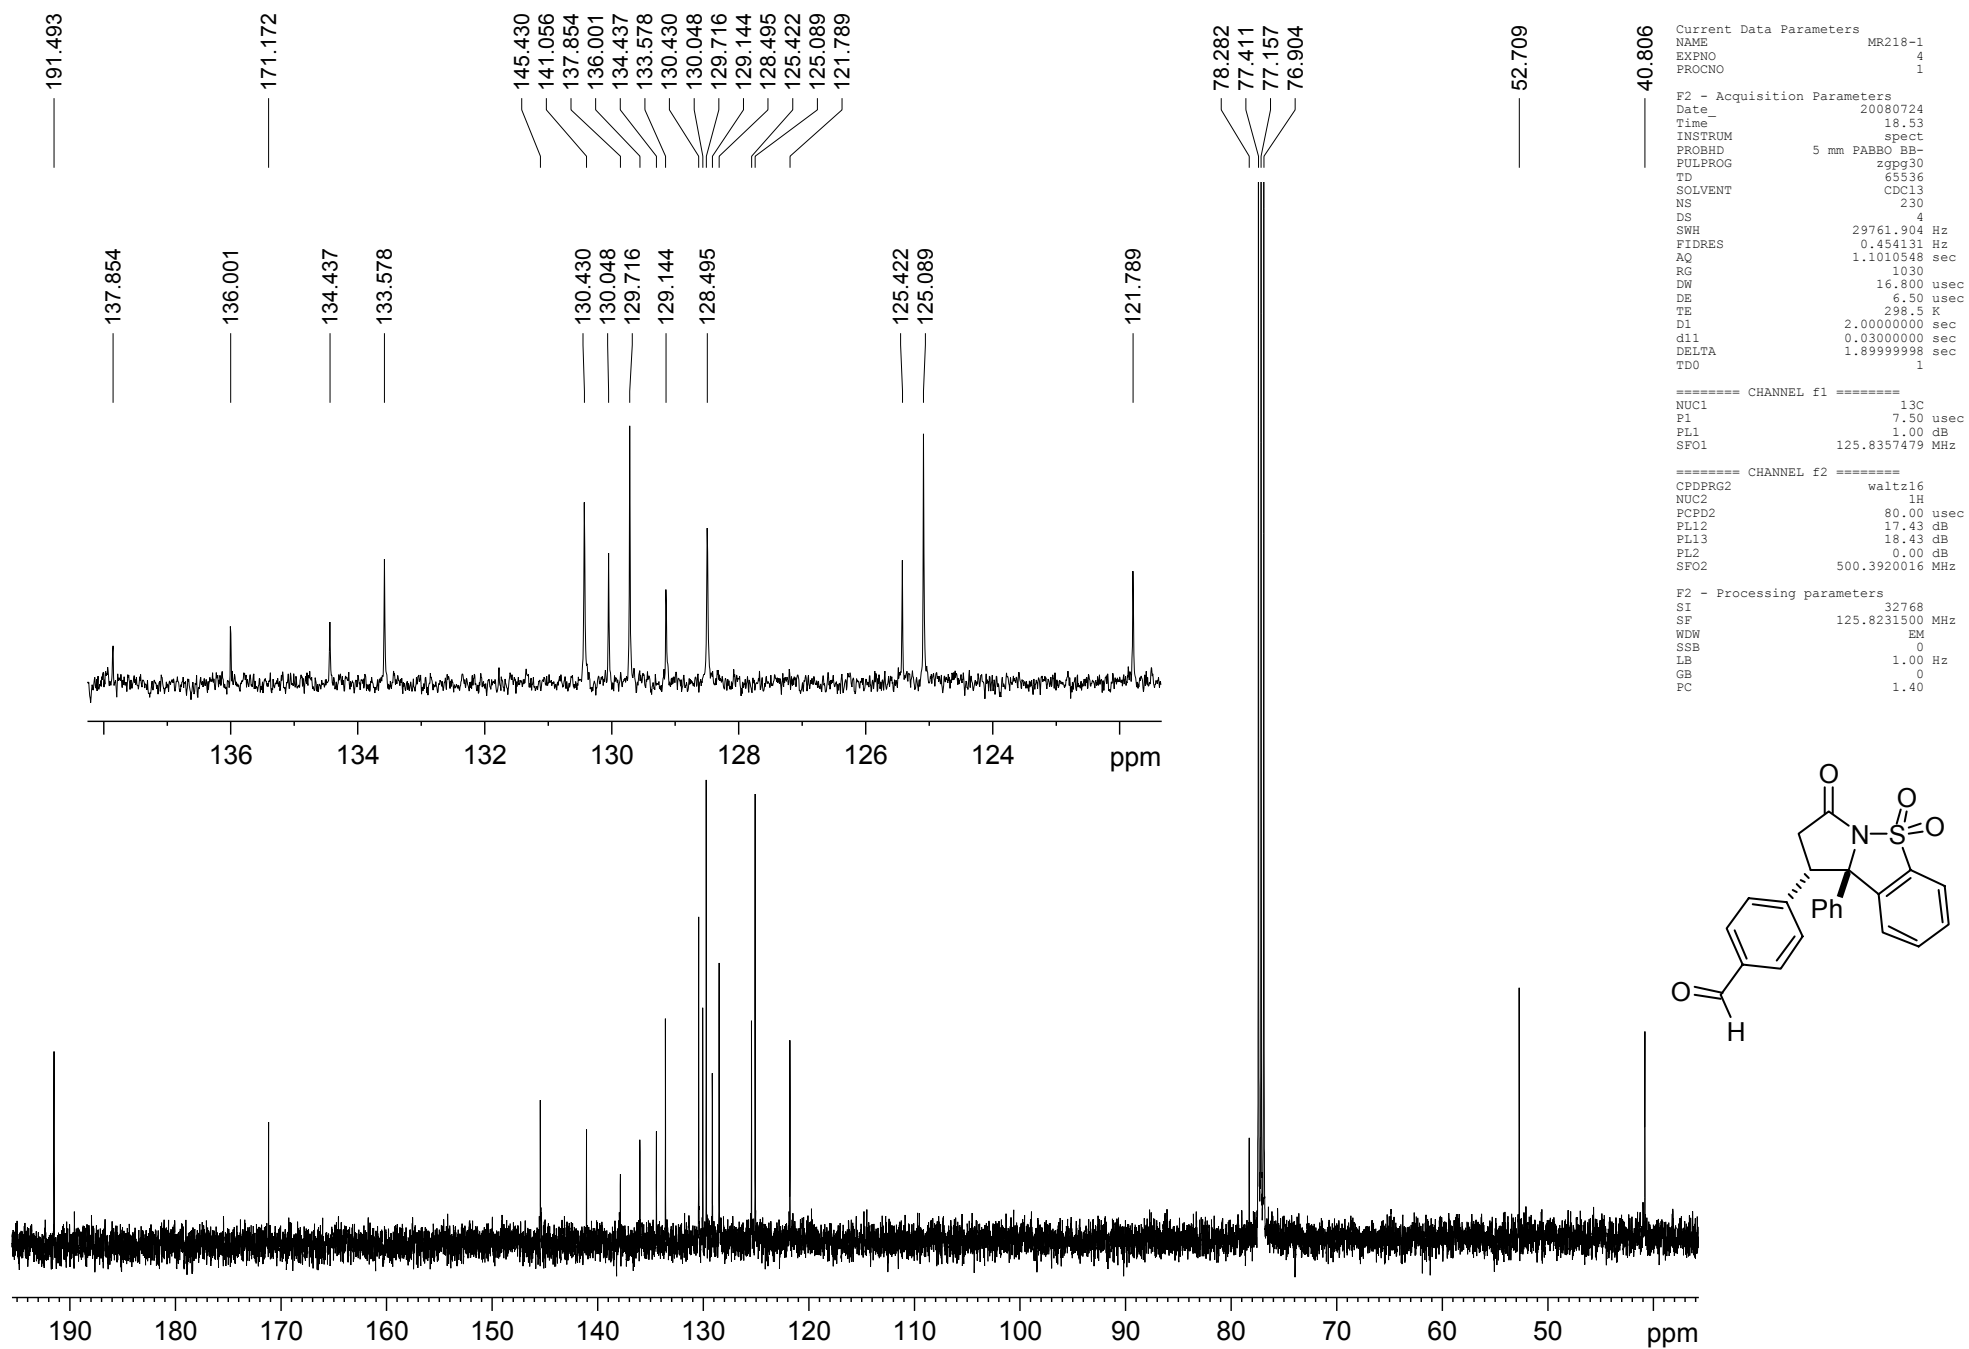

7.860  
7.845  
7.748  
7.734  
7.724  
7.598  
7.583  
7.540  
7.524  
7.422  
7.408  
7.392  
7.361  
7.346

5.820  
5.807  
5.803  
5.794  
5.790  
5.777  
5.068  
5.065  
5.049  
5.046  
5.042  
5.037  
5.034  
5.018  
5.016

3.467  
3.448  
3.428  
3.408

2.639  
2.618

1.765  
1.762  
1.752

```
Current Data Parameters
NAME MR213-2
EXPNO 1
PROCNO 1

F2 - Acquisition Parameters
Date_ 20080709
Time 17.53
INSTRUM spect
PROBHD 5 mm PABBO BB-
PULPROG zg30
TD 65536
SOLVENT CDCl3
NS 14
DS 2
SWH 7002.801 Hz
FIDRES 0.106854 Hz
AQ 4.6793203 sec
RG 1030
DW 71.400 usec
DE 6.50 usec
TE 298.4 K
D1 1.00000000 sec
TD0 1

===== CHANNEL f1 =====
NUC1 1H
P1 10.76 usec
PL1 0.00 dB
SFO1 500.3932525 MHz

F2 - Processing parameters
SI 32768
SF 500.3900160 MHz
WDW EM
SSB 0
LB 0.30 Hz
GB 0
PC 1.00
```

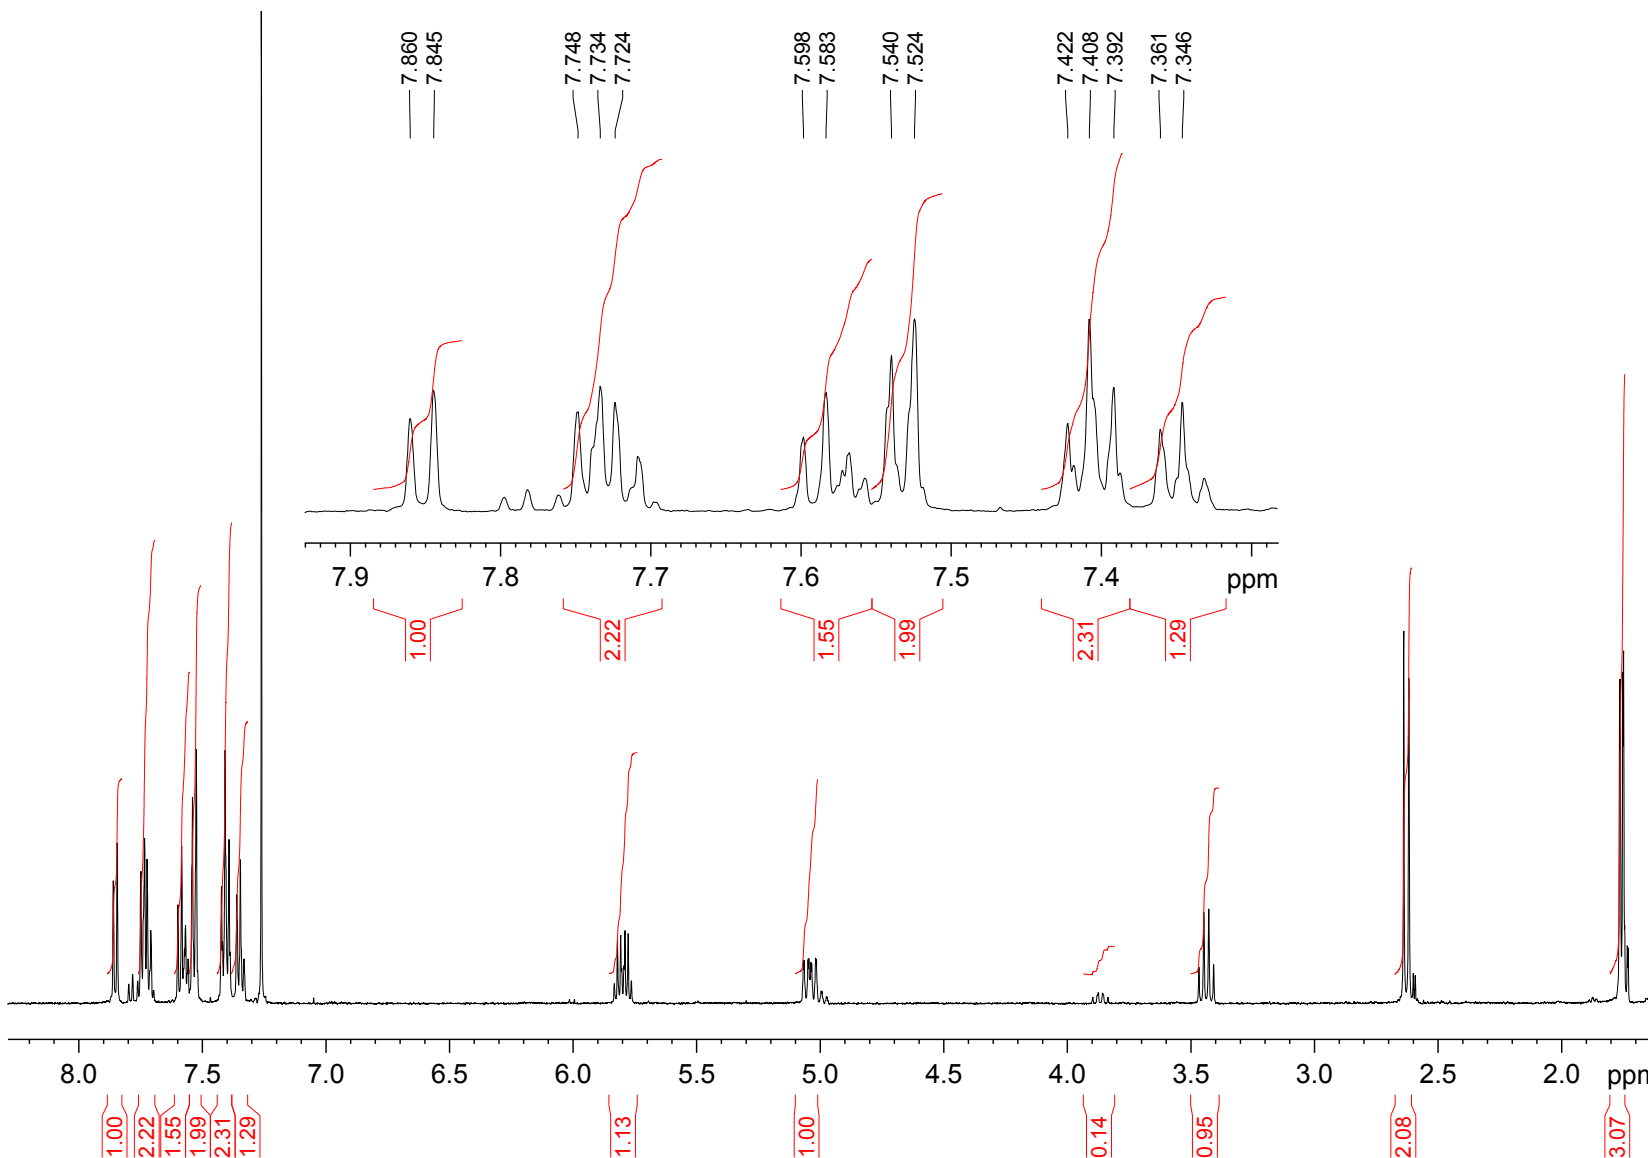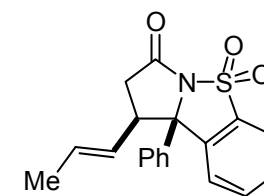

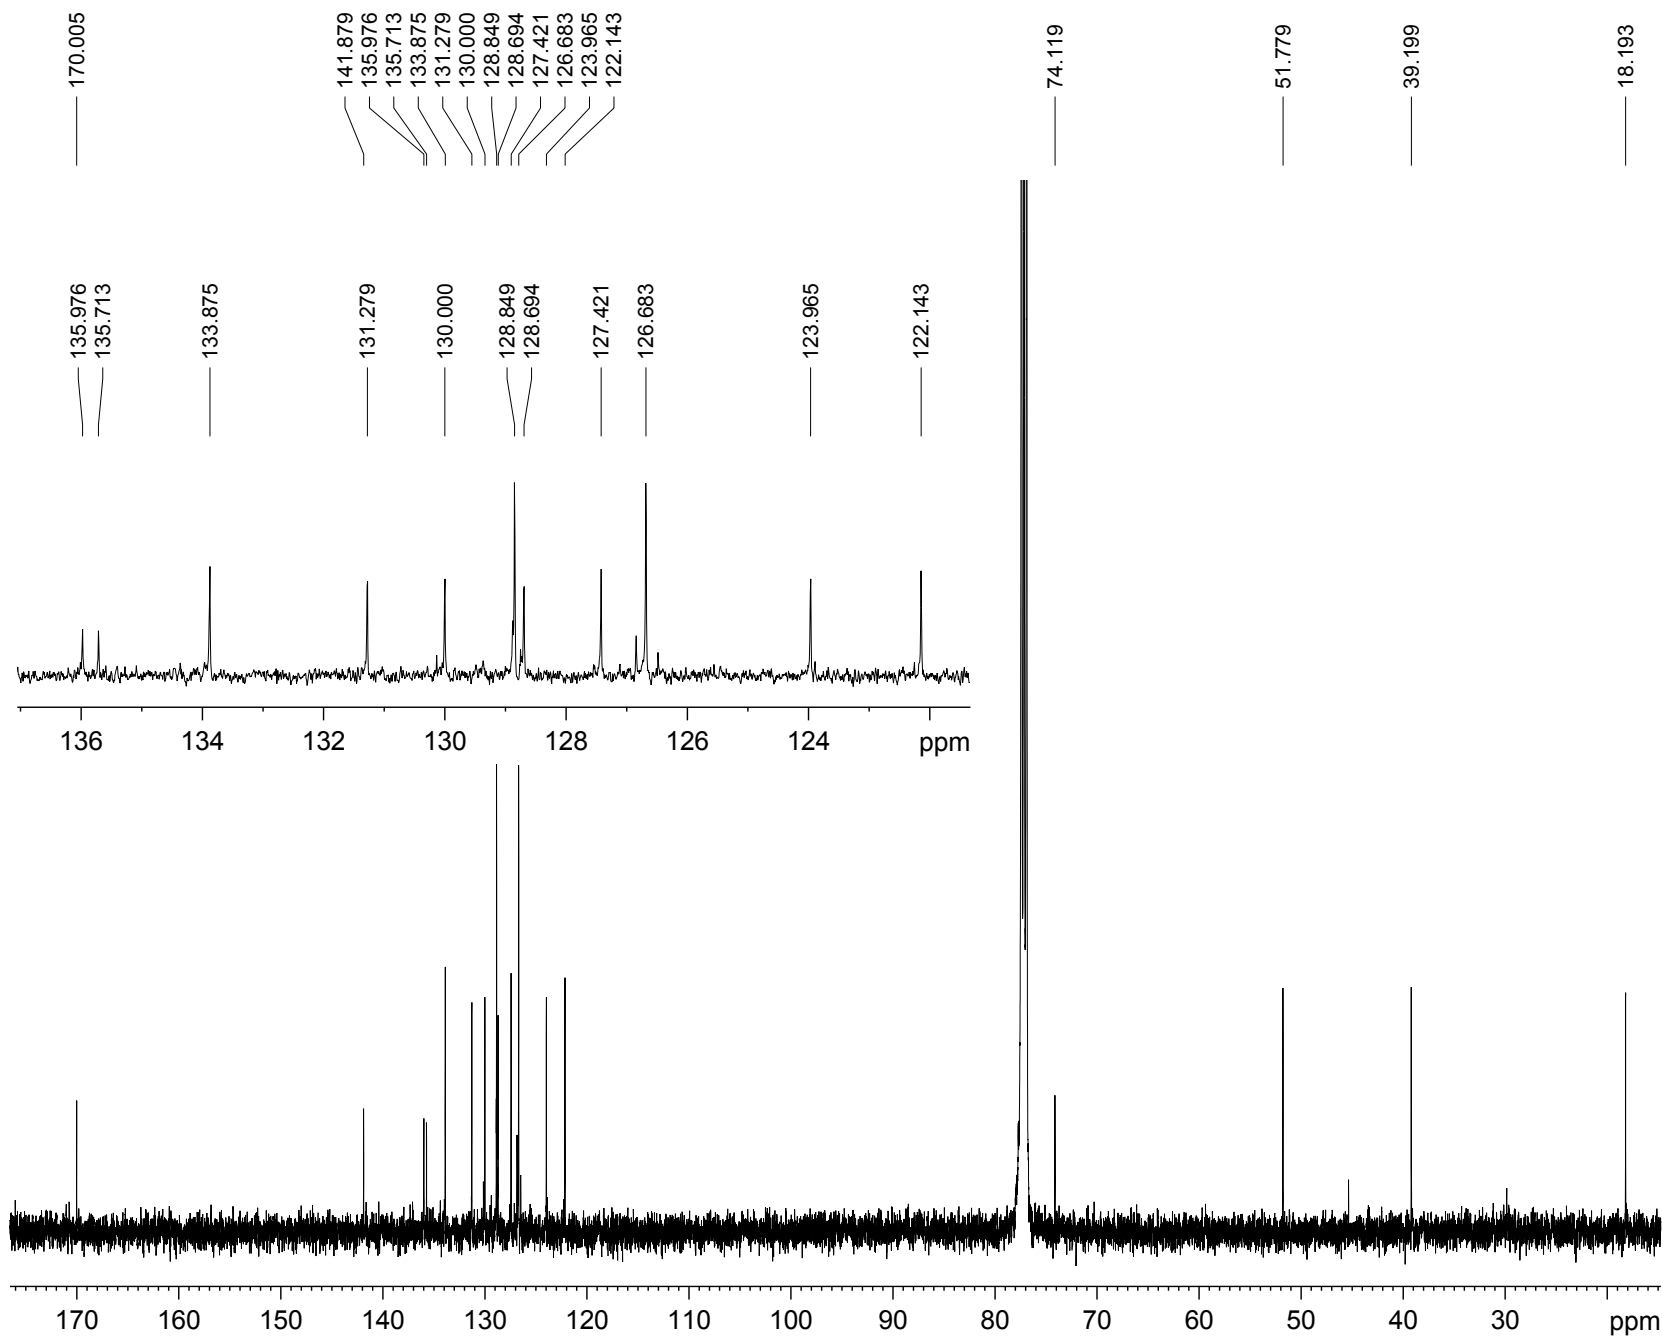

```

Current Data Parameters
NAME                MR213-2
EXPNO               7
PROCNO             1

F2 - Acquisition Parameters
Date_              20080928
Time_              1.57
INSTRUM            spect
PROBHD             5 mm PABBO BB-
PULPROG            zgpg30
TD                 65536
SOLVENT            CDCl3
NS                 6144
DS                 4
SWH                29761.904 Hz
FIDRES             0.454131 Hz
AQ                 1.1010548 sec
RG                 1030
DW                 16.800 usec
DE                 6.50 usec
TE                 298.5 K
D1                 2.00000000 sec
d11                 0.03000000 sec
DELTA              1.89999998 sec
TD0                1

===== CHANNEL f1 =====
NUC1                13C
P1                  7.50 usec
PL1                 1.00 dB
SFO1                125.8357479 MHz

===== CHANNEL f2 =====
CPDPRG2            waltz16
NUC2                1H
PCPD2              80.00 usec
PL12                17.43 dB
PL13                18.43 dB
PL2                 0.00 dB
SFO2                500.3920016 MHz

F2 - Processing parameters
SI                  32768
SF                  125.8231500 MHz
WDW                 EM
SSB                 0
LB                  1.00 Hz
GB                  0
PC                  1.40

```

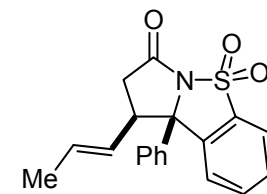

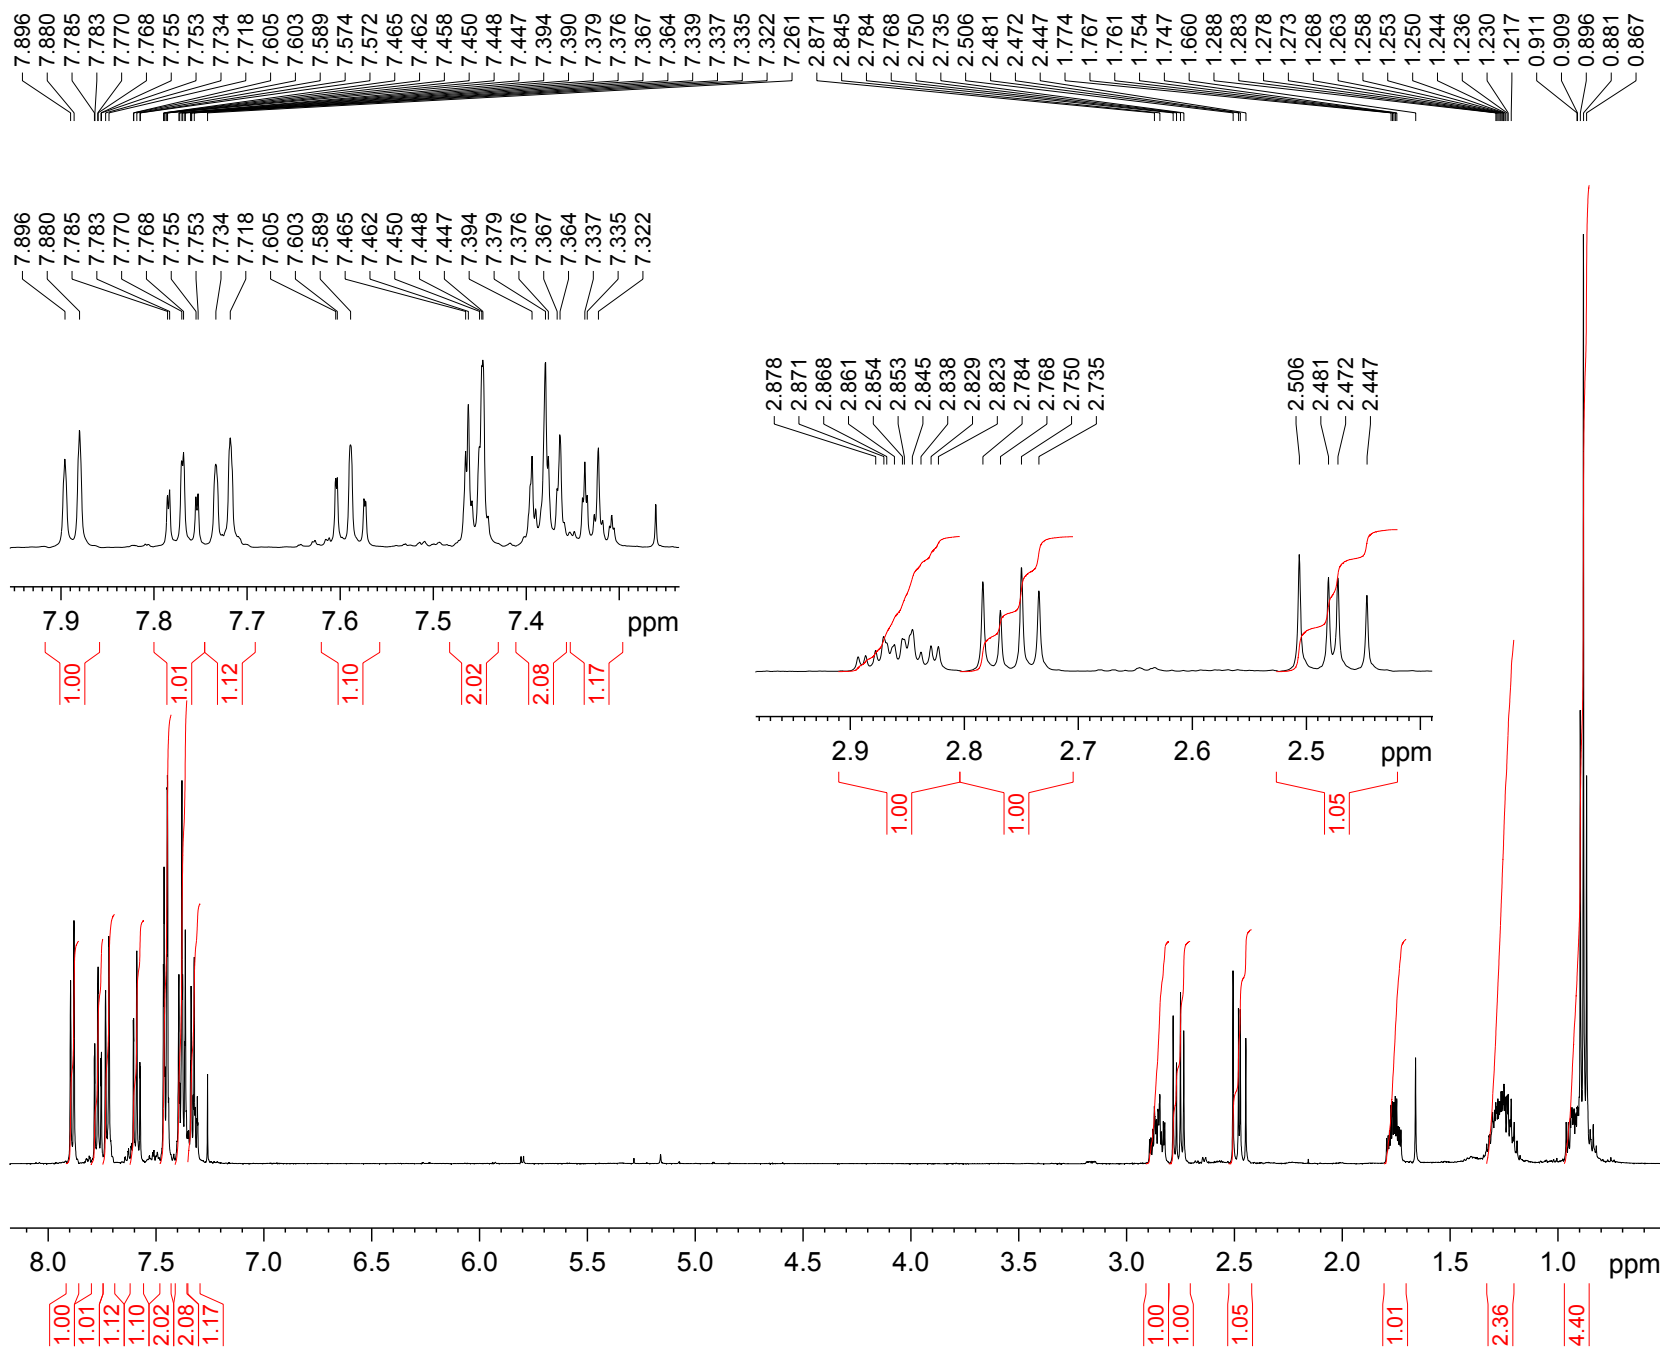

```

Current Data Parameters
NAME                MR215-1
EXPNO                1
PROCNO              1

F2 - Acquisition Parameters
Date_                20080709
Time                 12.00
INSTRUM              spect
PROBHID              5 mm PABBO BB-
PULPROG              zg30
TD                   65536
SOLVENT              CDCl3
NS                   10
DS                   2
SWH                  7002.801 Hz
FIDRES               0.106854 Hz
AQ                   4.6793203 sec
RG                   114
DW                   71.400 usec
DE                   6.50 usec
TE                   298.2 K
D1                   1.00000000 sec
TD0                  1

===== CHANNEL f1 =====
NUC1                  1H
P1                    10.76 usec
PL1                   0.00 dB
SF01                  500.3932525 MHz

F2 - Processing parameters
SI                    32768
SF                    500.3900160 MHz
WDW                   EM
SSB                   0
LB                    0.30 Hz
GB                    0
PC                    1.00

```

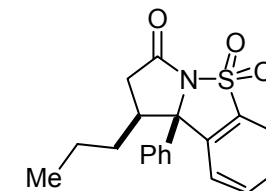

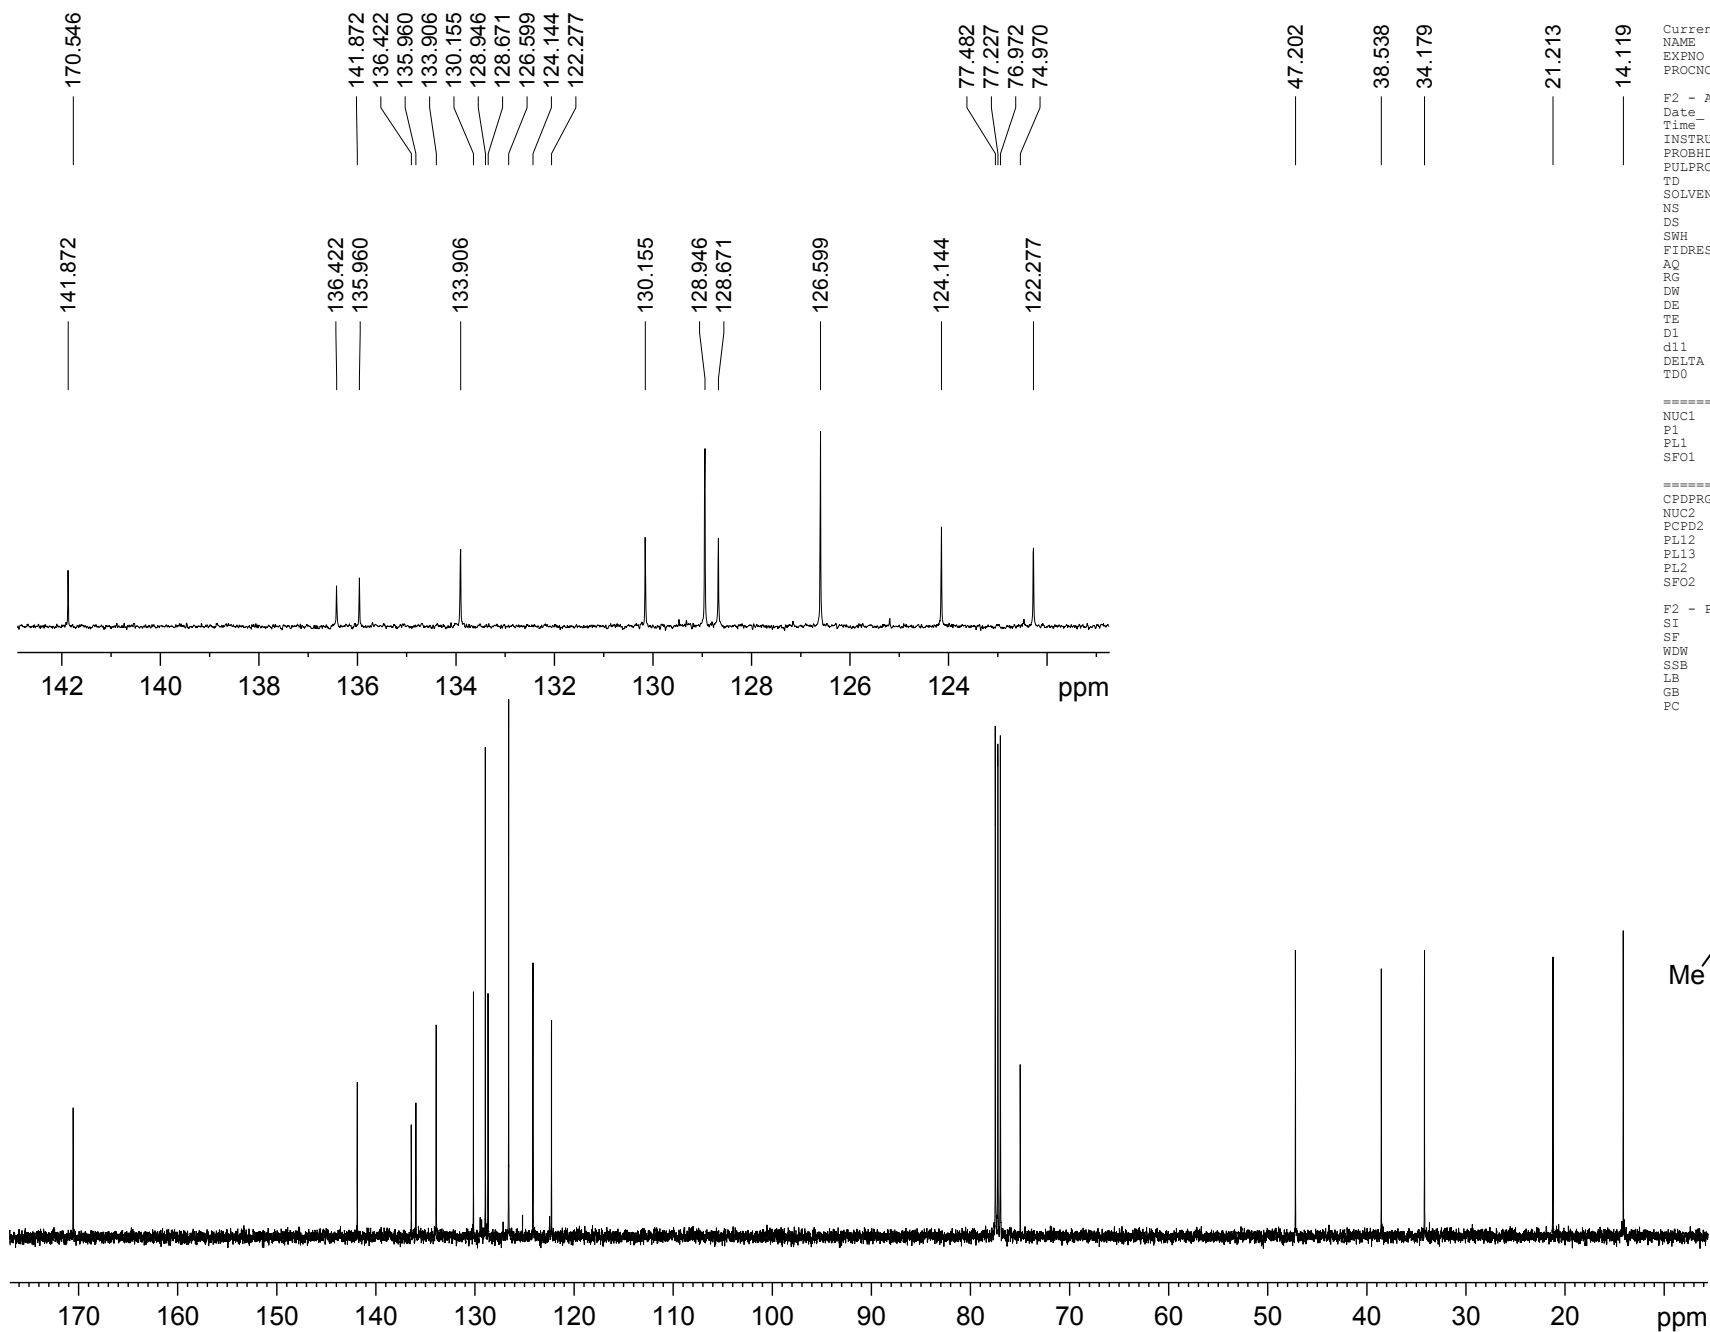

```

Current Data Parameters
NAME                MR215-1
EXPNO                2
PROCNO               1

F2 - Acquisition Parameters
Date_                20080709
Time_                12.05
INSTRUM              spect
PROBHD               5 mm PABBO BB-
PULPROG              zgpg30
TD                   65536
SOLVENT              CDCl3
NS                   60
DS                   4
SWH                  29761.904 Hz
FIDRES               0.454131 Hz
AQ                   1.1010548 sec
RG                   1440
DW                   16.800 usec
DE                   6.50 usec
TE                   298.9 K
D1                   2.0000000 sec
d11                  0.0300000 sec
DELTA                1.89999998 sec
TD0                  1

===== CHANNEL f1 =====
NUC1                  13C
P1                    7.50 usec
PL1                   1.00 dB
SFO1                  125.8357479 MHz

===== CHANNEL f2 =====
CPDPRG2              waltz16
NUC2                  1H
PCPD2                80.00 usec
PL12                  17.43 dB
PL13                  18.43 dB
PL2                   0.00 dB
SFO2                  500.3920016 MHz

F2 - Processing parameters
SI                    32768
SF                    125.8231500 MHz
WDW                   EM
SSB                   0
LB                    1.00 Hz
GB                    0
PC                    1.40

```



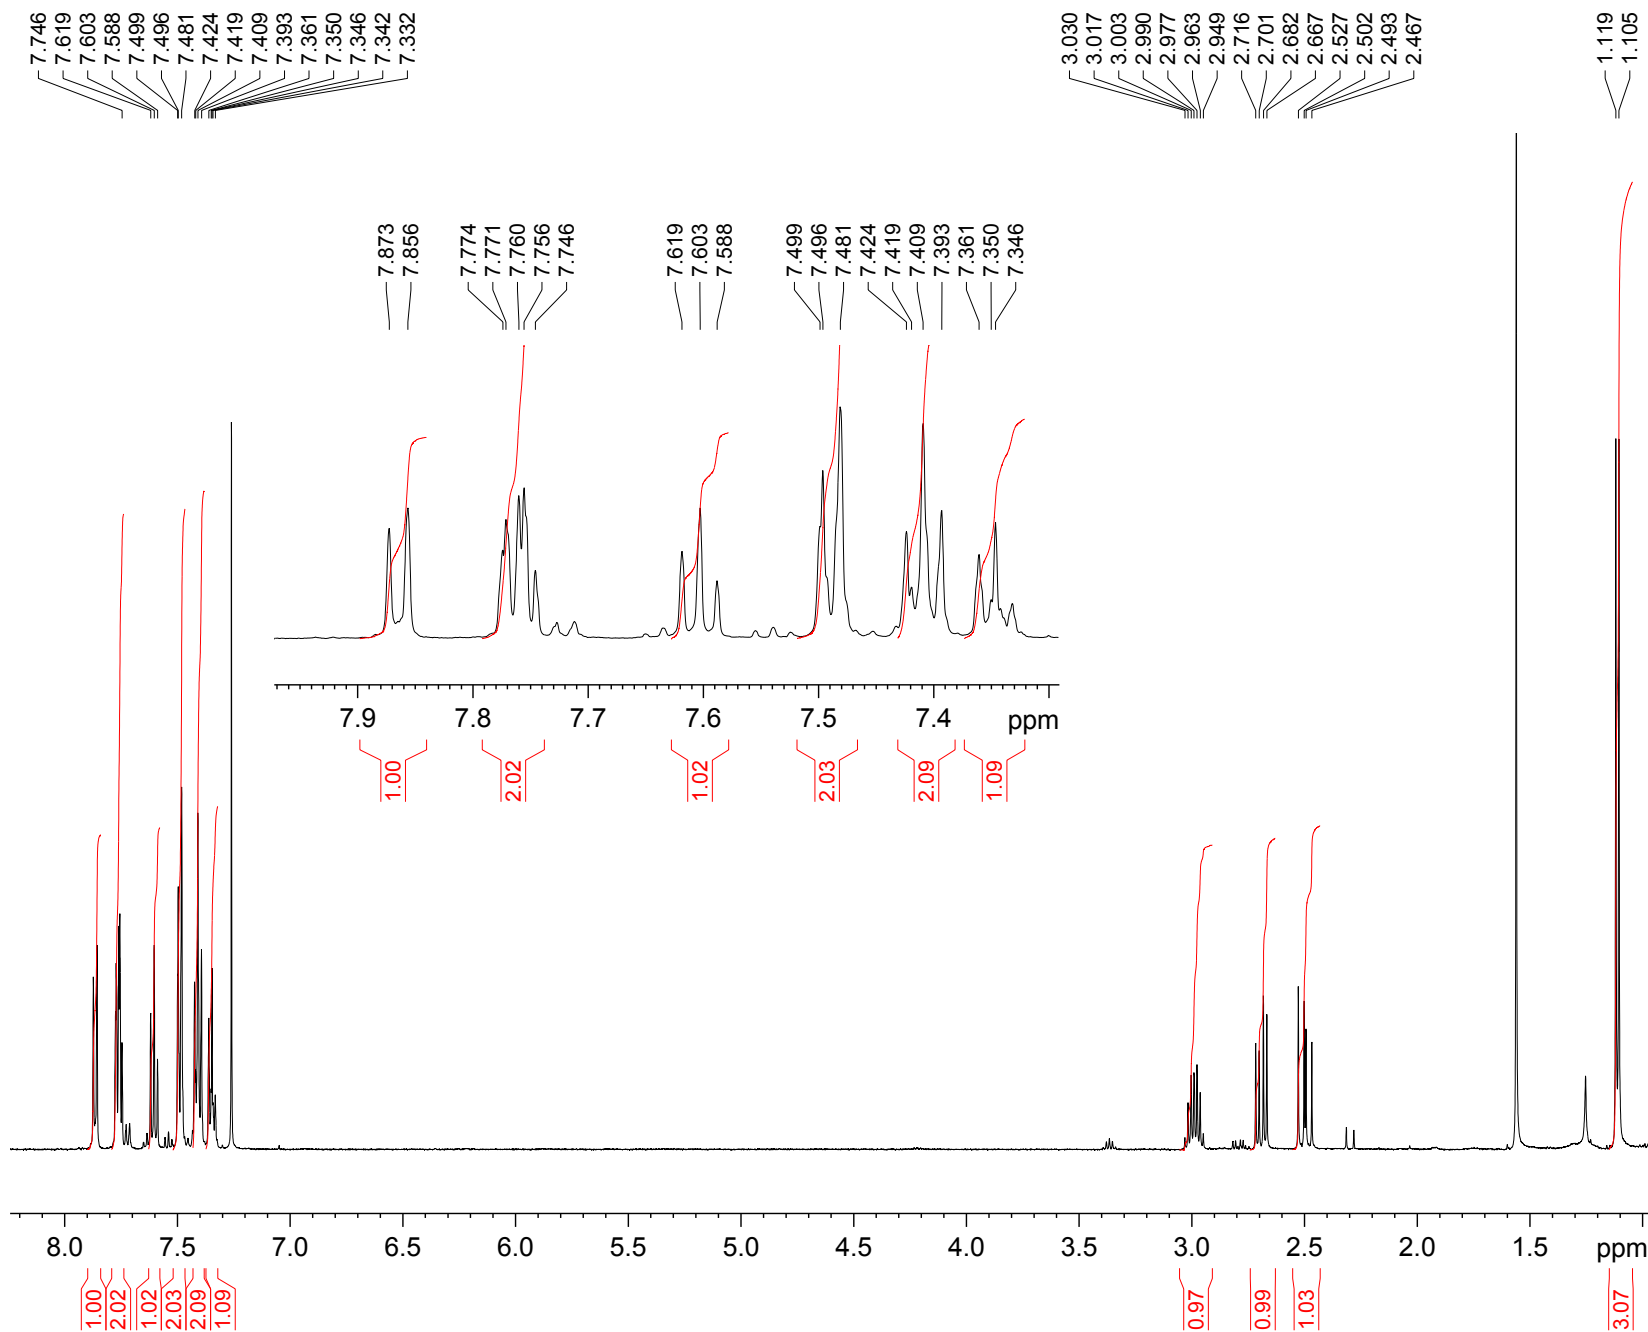

```

Current Data Parameters
NAME MR212-2
EXPNO 4
PROCNO 1

F2 - Acquisition Parameters
Date_ 20081003
Time_ 9.46
INSTRUM spect
PROBHD 5 mm DUL D/1H-
PULPROG zg30
TD 65536
SOLVENT CDCl3
NS 16
DS 2
SWH 7002.801 Hz
FIDRES 0.106854 Hz
AQ 4.6793203 sec
RG 812
DW 71.400 usec
DE 6.50 usec
TE 298.2 K
D1 1.0000000 sec
TD0 1

===== CHANNEL f1 =====
NUC1 1H
P1 10.00 usec
PL1 -2.00 dB
SFO1 500.3932525 MHz

F2 - Processing parameters
SI 32768
SF 500.3900160 MHz
WDW EM
SSB 0
LB 0.30 Hz
GB 0
PC 1.00
    
```

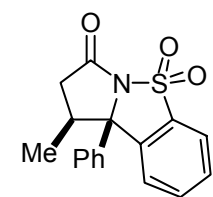

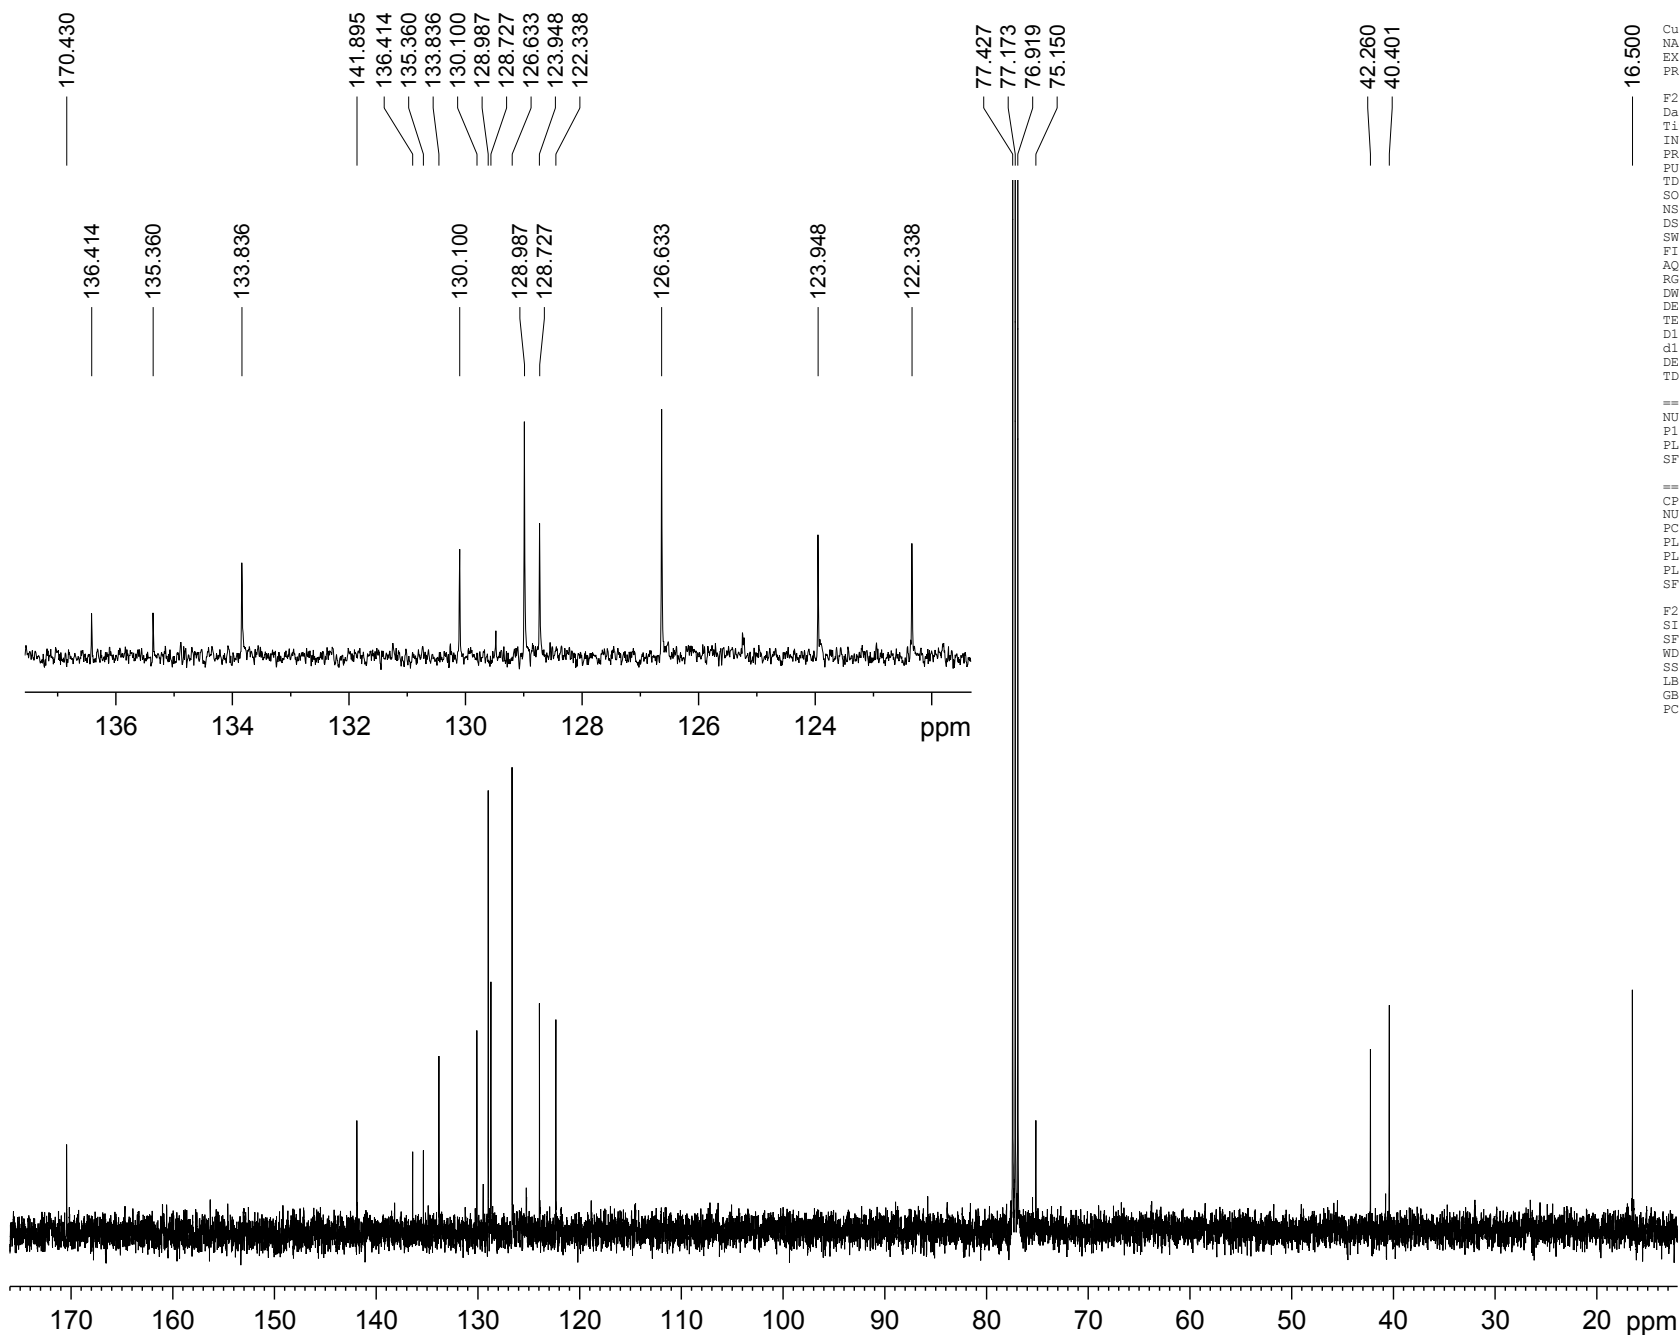

170.430  
136.414  
135.360  
133.836  
141.895  
136.414  
135.360  
133.836  
130.100  
128.987  
128.727  
126.633  
123.948  
122.338

77.427  
77.173  
76.919  
75.150

42.260  
40.401

16.500

```
Current Data Parameters
NAME MR12-2
EXPNO 2
PROCNO 1

F2 - Acquisition Parameters
Date_ 20080709
Time_ 12.25
INSTRUM spect
PROBHD 5 mm PABBO BB-
PULPROG zgpg30
TD 65536
SOLVENT CDCl3
NS 49
DS 4
SWH 29761.904 Hz
FIDRES 0.454131 Hz
AQ 1.1010548 sec
RG 1030
DW 16.800 usec
DE 6.50 usec
TE 299.0 K
D1 2.0000000 sec
d11 0.0300000 sec
DELTA 1.89999998 sec
TD0 1

===== CHANNEL f1 =====
NUC1 13C
P1 7.50 usec
PL1 1.00 dB
SFO1 125.8357479 MHz

===== CHANNEL f2 =====
CPDPRG2 waltz16
NUC2 1H
PCPD2 80.00 usec
PL12 17.43 dB
PL13 18.43 dB
PL2 0.00 dB
SFO2 500.3920016 MHz

F2 - Processing parameters
SI 32768
SF 125.8231500 MHz
WDW EM
SSB 0
LB 1.00 Hz
GB 0
PC 1.40
```

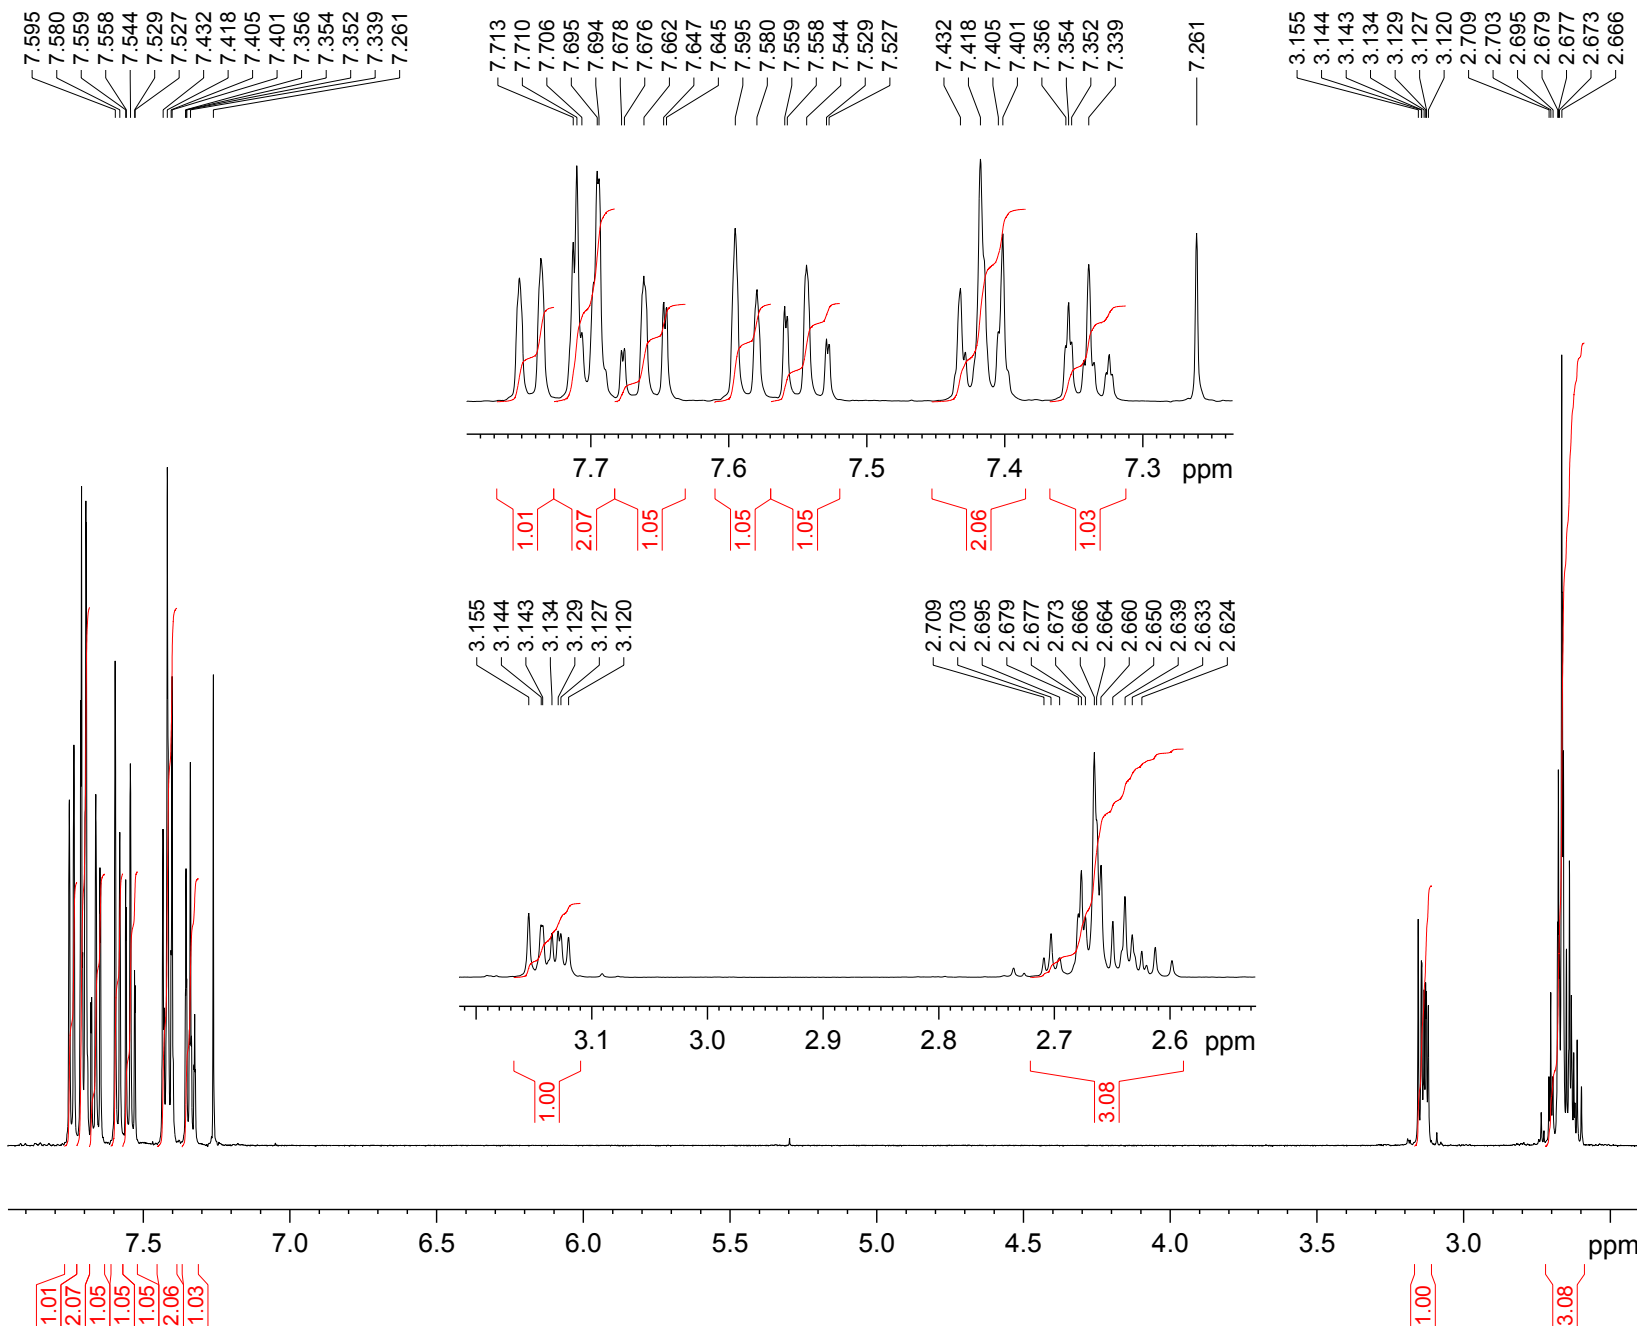

```

Current Data Parameters
NAME MR214-2
EXPNO 1
PROCNO 1

F2 - Acquisition Parameters
Date_ 20080709
Time 12.13
INSTRUM spect
PROBHD 5 mm PABBO BB-
PULPROG zg30
TD 65536
SOLVENT CDCl3
NS 16
DS 2
SWH 7002.801 Hz
FIDRES 0.106854 Hz
AQ 4.6793203 sec
RG 362
DW 71.400 usec
DE 6.50 usec
TE 298.2 K
D1 1.00000000 sec
TD0 1

===== CHANNEL f1 =====
NUC1 1H
P1 10.76 usec
PL1 0.00 dB
SFO1 500.3932525 MHz

F2 - Processing parameters
SI 32768
SF 500.3900160 MHz
WDW EM
SSB 0
LB 0.30 Hz
GB 0
PC 1.00
    
```

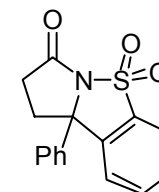

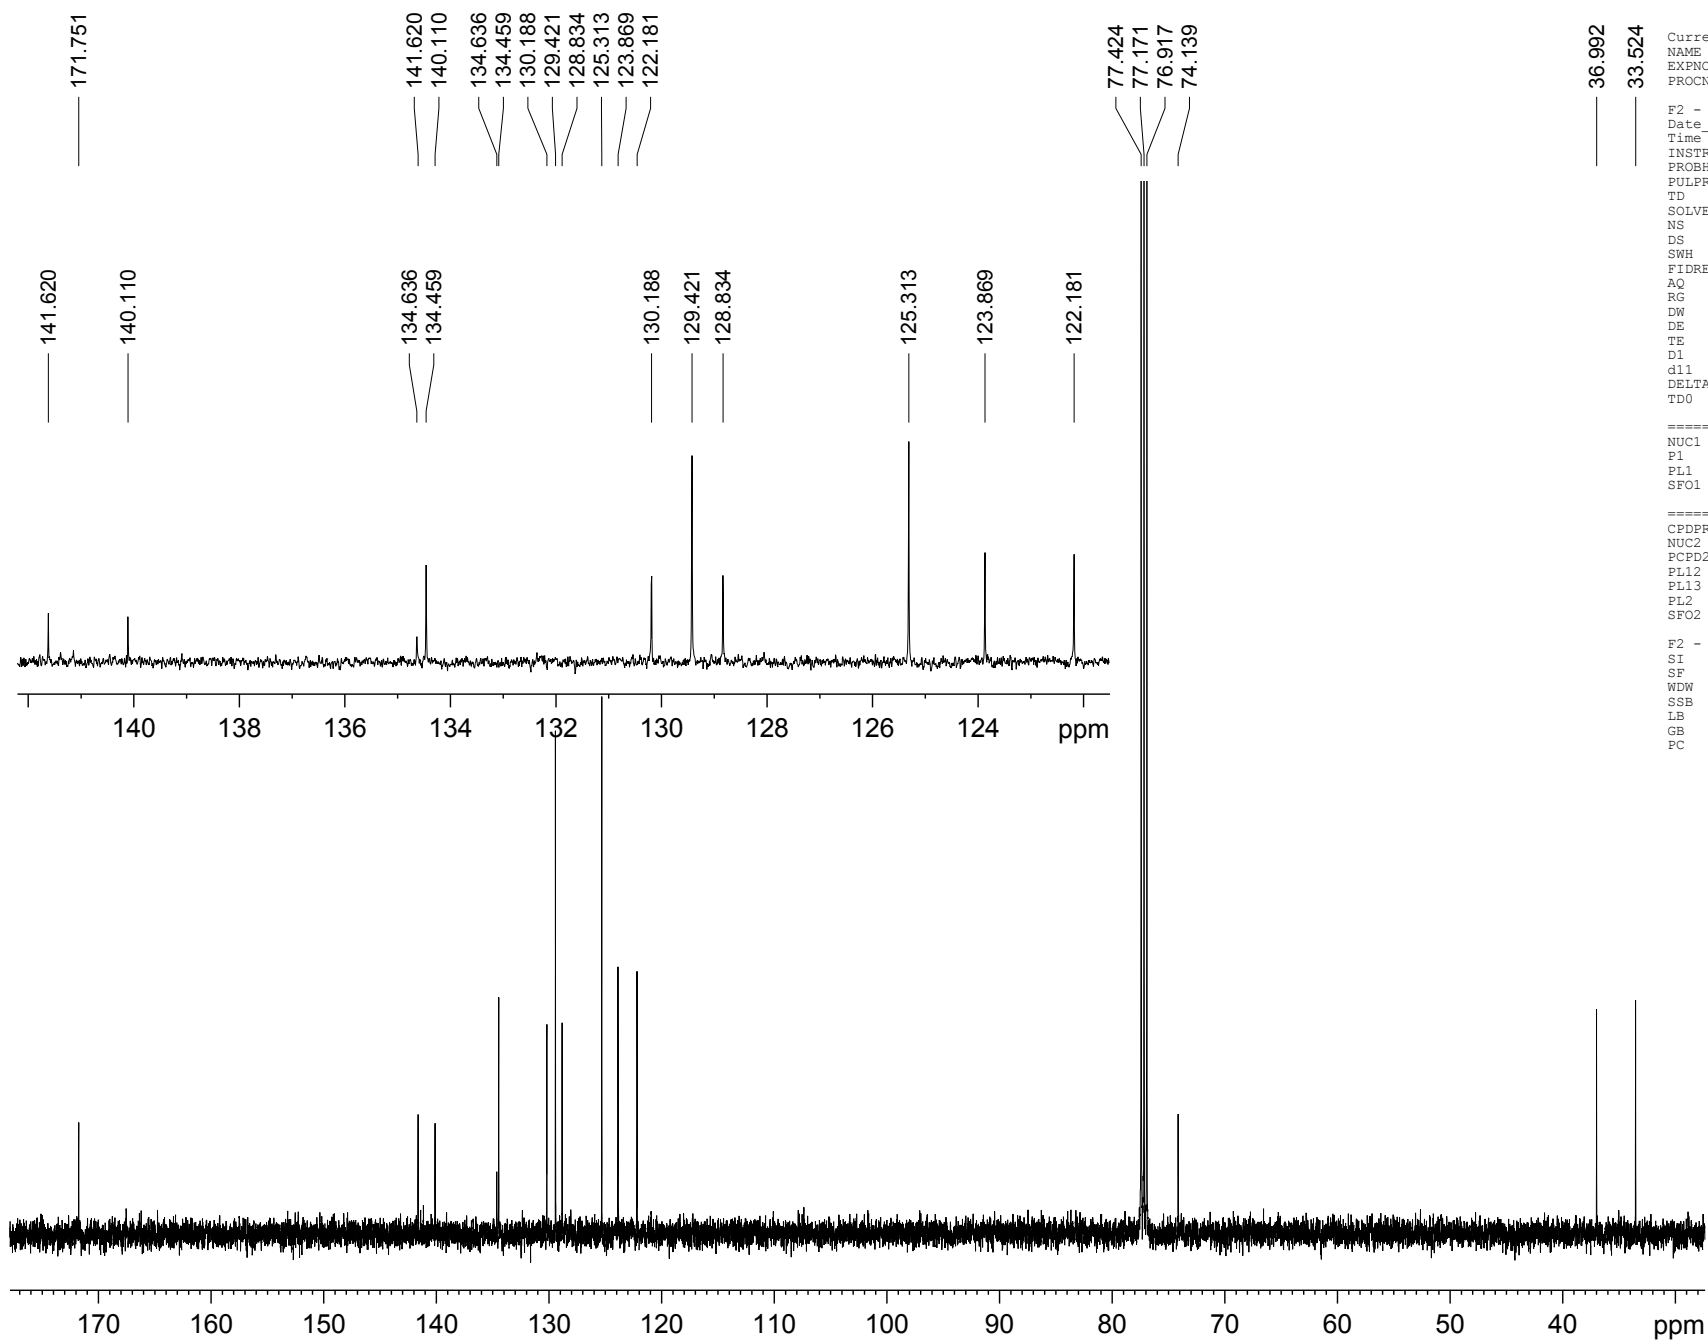

```

Current Data Parameters
NAME MR214-2
EXPNO 2
PROCNO 1

F2 - Acquisition Parameters
Date_ 20080709
Time 12.16
INSTRUM spect
PROBHD 5 mm PABBO BB-
PULPROG zgpg30
TD 65536
SOLVENT CDCl3
NS 76
DS 4
SWH 29761.904 Hz
FIDRES 0.454131 Hz
AQ 1.1010548 sec
RG 1290
DW 16.800 usec
DE 6.50 usec
TE 299.0 K
D1 2.00000000 sec
d11 0.03000000 sec
DELTA 1.89999998 sec
TD0 1

===== CHANNEL f1 =====
NUC1 13C
P1 7.50 usec
PL1 1.00 dB
SFO1 125.8357479 MHz

===== CHANNEL f2 =====
CPDPRG2 waltz16
NUC2 1H
PCPD2 80.00 usec
PL12 17.43 dB
PL13 18.43 dB
PL2 0.00 dB
SFO2 500.3920016 MHz

F2 - Processing parameters
SI 32768
SF 125.8231500 MHz
WDW EM
SSB 0
LB 1.00 Hz
GB 0
PC 1.40

```

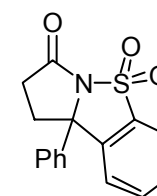

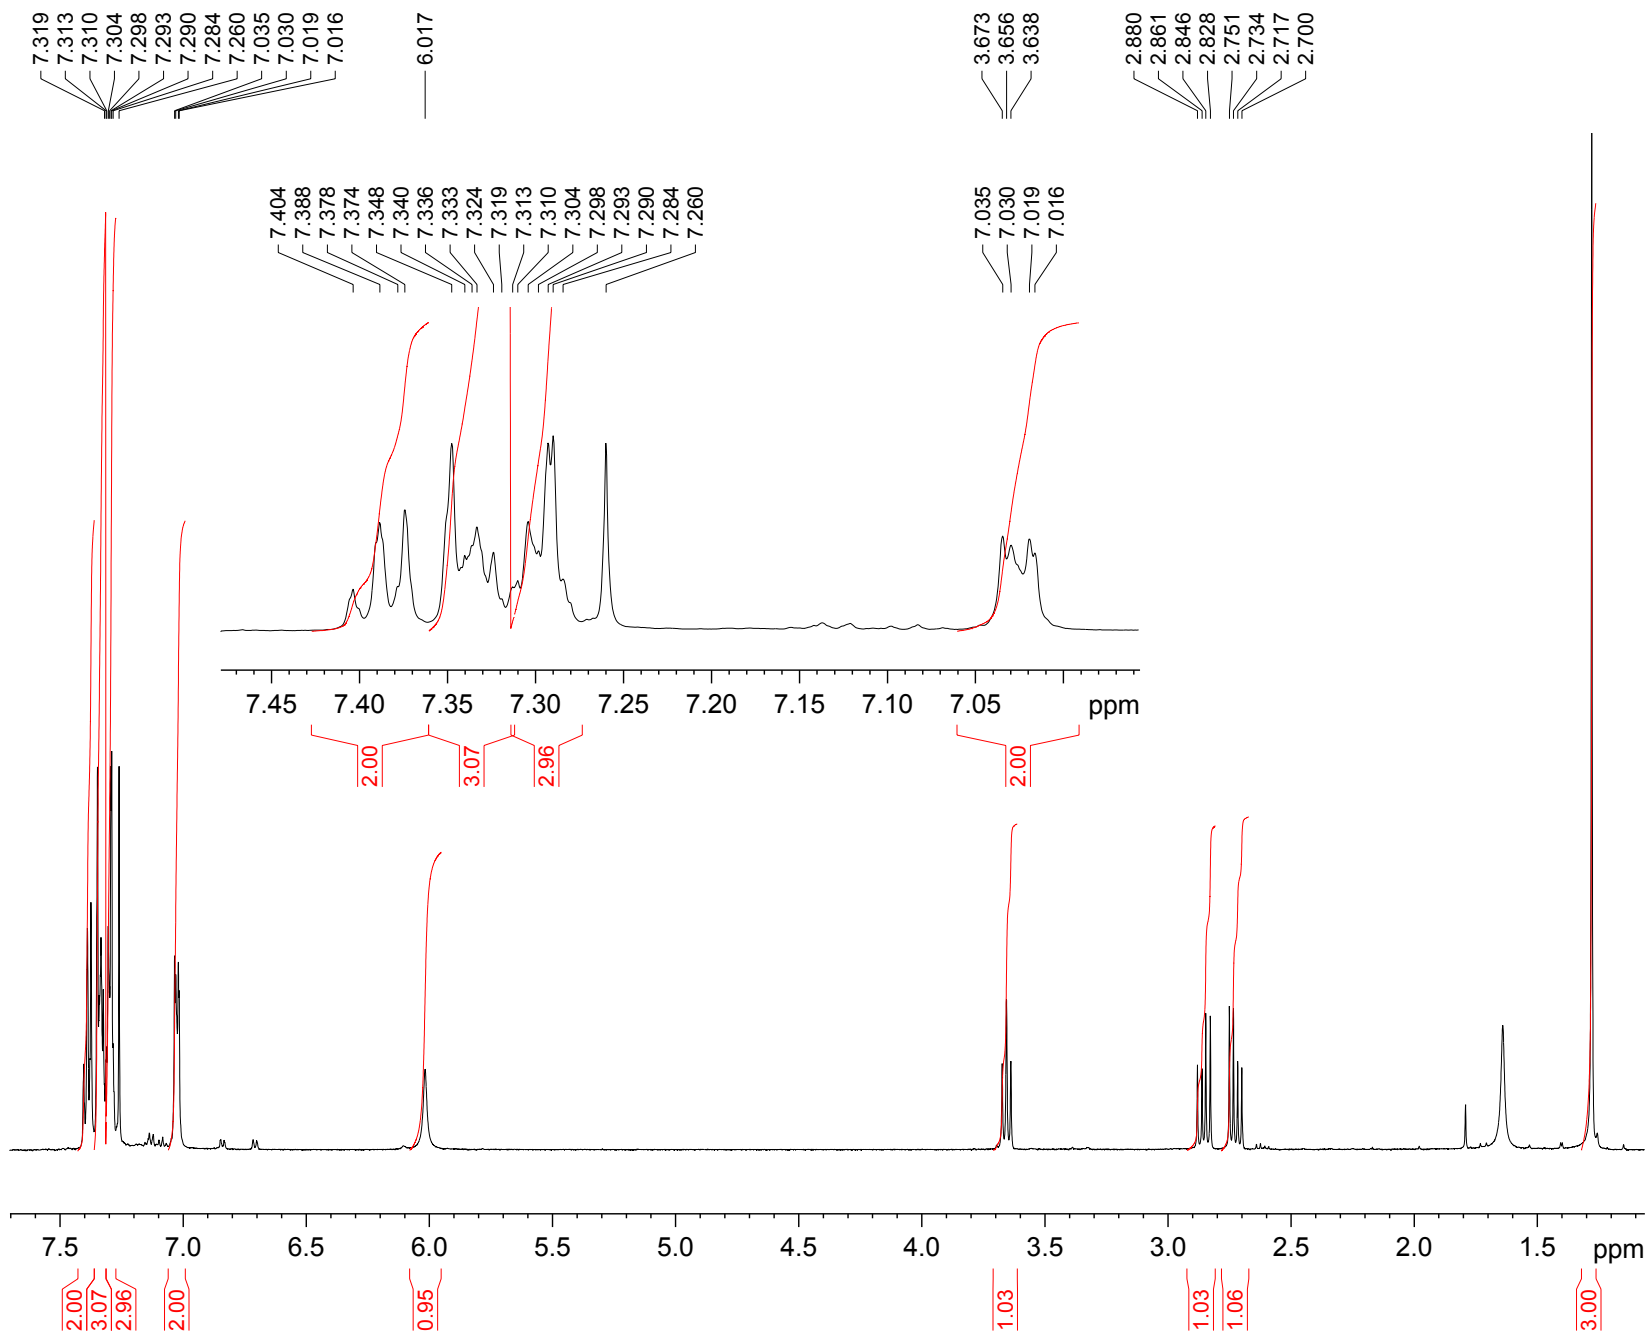

Current Data Parameters  
NAME MR221-36  
EXPNO 8  
PROCNO 1

F2 - Acquisition Parameters  
Date\_ 20081003  
Time 9.52  
INSTRUM spect  
PROBHD 5 mm DUL D/1H-  
PULPROG zg30  
TD 65536  
SOLVENT cdcl3  
NS 16  
DS 2  
SWH 7002.801 Hz  
FIDRES 0.106854 Hz  
AQ 4.6793203 sec  
RG 406  
DW 71.400 usec  
DE 6.50 usec  
TE 298.2 K  
D1 1.00000000 sec  
TDO 1

===== CHANNEL f1 =====  
NUC1 1H  
P1 10.00 usec  
PL1 -2.00 dB  
SFO1 500.3932525 MHz

F2 - Processing parameters 32768  
SI 500.3900160 MHz  
WDW EM  
SSB 0  
LB 0.30 Hz  
GB 0  
PC 1.00

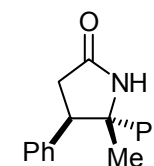

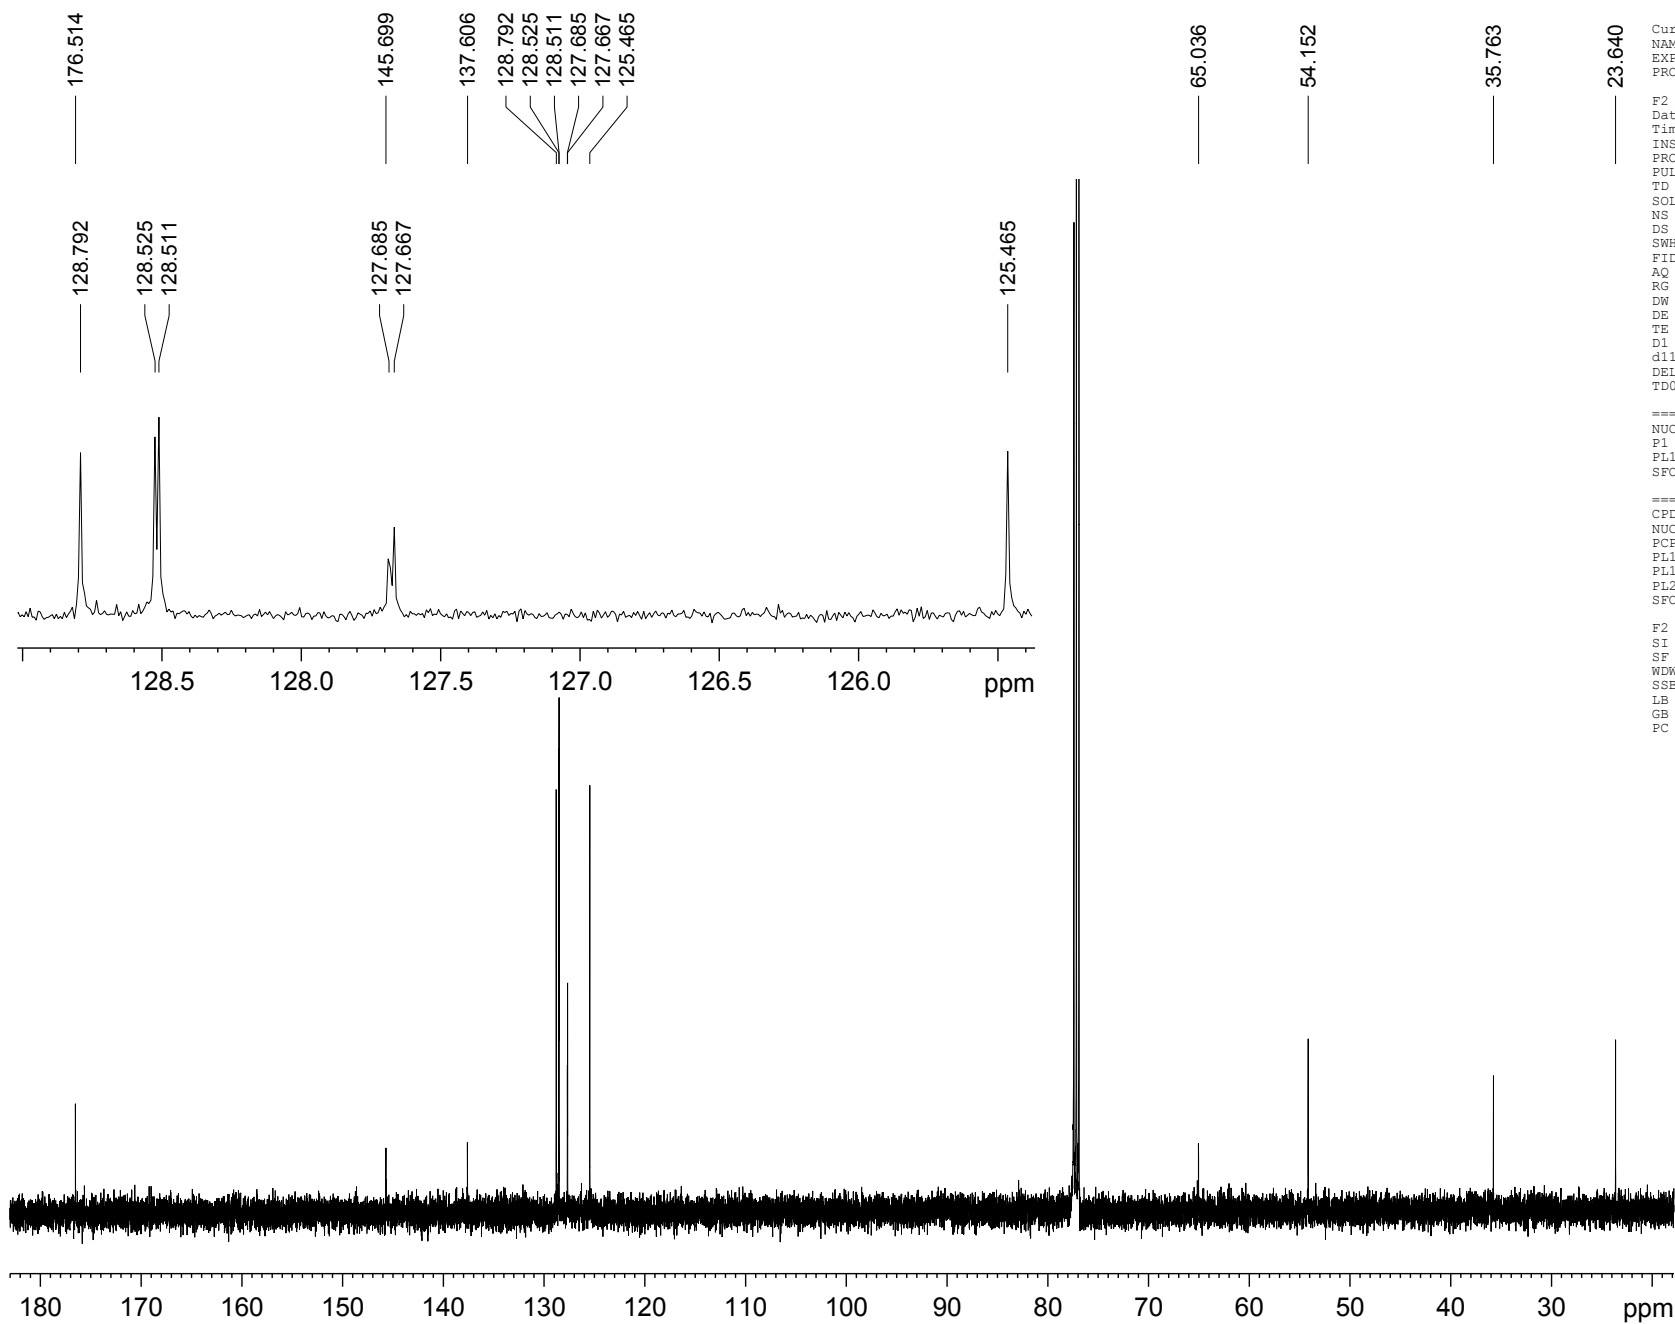

```

Current Data Parameters
NAME MR221-36
EXPNO 3
PROCNO 1

F2 - Acquisition Parameters
Date_ 20080928
Time 18.40
INSTRUM spect
PROBHD 5 mm PABBO BB-
PULPROG zgpg30
TD 65536
SOLVENT CDCl3
NS 255
DS 4
SWH 29761.904 Hz
FIDRES 0.454131 Hz
AQ 1.1010548 sec
RG 1030
DW 16.800 usec
DE 6.50 usec
TE 298.6 K
D1 2.00000000 sec
d11 0.03000000 sec
DELTA 1.89999998 sec
TDO 1

===== CHANNEL f1 =====
NUC1 13C
P1 7.50 usec
PL1 1.00 dB
SFO1 125.8357479 MHz

===== CHANNEL f2 =====
CPDPRG2 waltz16
NUC2 1H
PCPD2 80.00 usec
PL12 17.43 dB
PL13 18.43 dB
PL2 0.00 dB
SFO2 500.3920016 MHz

F2 - Processing parameters
SI 32768
SF 125.8231500 MHz
WDW EM
SSB 0
LB 0.10 Hz
GB 0
PC 1.40

```

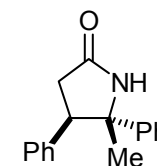

Supplement: NIHMS86617-supplement-1_si_001.pdf [file NIHMS86617-supplement-1_si_001.pdf]
